# Supplementary material
Source: MDPI journal article supplement (https://www.mdpi.com/2227-7390/10/22/4240)
Supplement: s1 [file s1]

Archive with 14 entries (14 files):
- Figure 1A_Mathematics-1964681.nb
- Figure 1B_Mathematics-1964681.nb
- Figure 2_Mathematics-1964681.nb
- Figure 3A_Mathematics-1964681.nb
- Figure 3B_Mathematics-1964681.nb
- Figure 4_Mathematics-1964681.nb
- Figure 5_Mathematics-1964681.nb
- Figure 6AC_Mathematics-1964681.nb
- Figure 6BD_Mathematics-1964681.nb
- Figure S1ACE_Mathematics-1964681.nb
- Figure S1BDF_Mathematics-1964681.nb
- Figure S2AB_Mathematics-1964681.nb
- mathematics-1964681-supplementary.pdf
- Supplementary material_mathematics-1964681.pdf
