# Supplementary material
Source: MDPI journal article supplement (https://www.mdpi.com/2227-7390/10/22/4240)
Supplement: s1 [file s1 › Figure 4_Mathematics-1964681.nb]

(* Content-type: application/vnd.wolfram.mathematica *)

(*** Wolfram Notebook File ***)
(* http://www.wolfram.com/nb *)

(* CreatedBy='Mathematica 12.2' *)

(*CacheID: 234*)
(* Internal cache information:
NotebookFileLineBreakTest
NotebookFileLineBreakTest
NotebookDataPosition[       158,          7]
NotebookDataLength[    164689,       3855]
NotebookOptionsPosition[    159069,       3752]
NotebookOutlinePosition[    159471,       3768]
CellTagsIndexPosition[    159428,       3765]
WindowFrame->Normal*)

(* Beginning of Notebook Content *)
Notebook[{

Cell[CellGroupData[{
Cell["\<\
Ping-Pong Reaction with One Substrate Undergoing Disproportionation
in the Absence of Suicide Substrate Inactivation\
\>", "Section",
 CellChangeTimes->{
  3.87535263895614*^9},ExpressionUUID->"2eca4cf7-9db6-4441-9ec8-bcec228c7aea"],

Cell[CellGroupData[{

Cell[TextData[{
 Cell[BoxData[
  FormBox[GridBox[{
     {
      RowBox[{
       RowBox[{
       Cell["A", "Text",ExpressionUUID->
         "b559930b-d615-431e-86b1-a01e084a43b1"], "+", Cell[
        "E\[NonBreakingSpace]", "Text",ExpressionUUID->
         "eeef836a-8a6a-49ec-9d6f-b88ba16aafc3"]}], 
       OverscriptBox["\[RightArrow]", 
        SubscriptBox["k", "a"]], 
       RowBox[{
       Cell["F", "Text",ExpressionUUID->
         "d8ee3a39-fd70-4336-bb3e-3fd0587adbb6"], "+", Cell[
        "P", "Text",ExpressionUUID->
         "f1d08f57-f0e1-4736-a77e-677495193ecd"]}]}]},
     {
      RowBox[{
       RowBox[{
       Cell["A", "Text",ExpressionUUID->
         "e460a60f-a9a4-403e-8a46-450139adf9d1"], "+", Cell[
        "F\[NonBreakingSpace]", "Text",ExpressionUUID->
         "9f1d8292-9aeb-4f20-9c6d-5e4323b66598"]}], 
       OverscriptBox["\[RightArrow]", 
        SubscriptBox["k", "d"]], 
       RowBox[{
       Cell["E", "Text",ExpressionUUID->
         "f56b161d-091c-4747-93a4-5d1a87dc1961"], "+", Cell[
        "Q", "Text",ExpressionUUID->
         "83738949-0de0-49df-961b-05e0200e461e"]}]}]}
    },
    GridBoxAlignment->{"Columns" -> {{Left}}, "Rows" -> {{Baseline}}}], 
   TraditionalForm]],ExpressionUUID->"bb67debe-ab9d-402a-8979-58dd195ec97d"],
 "\n\n",
 Cell[BoxData[
  RowBox[{
   SubscriptBox[
    StyleBox["k",
     FontSlant->"Italic"], "c"], " ", "\[RightArrow]", " ", 
   RowBox[{"\[Infinity]", " ", "and", " ", 
    SubscriptBox[
     StyleBox["k",
      FontSlant->"Italic"], "f"]}], " ", "\[RightArrow]", " ", 
   "\[Infinity]"}]],
  CellChangeTimes->{{3.841749732856798*^9, 3.841749906918338*^9}, {
    3.841750053788534*^9, 3.8417500568715334`*^9}, {3.8418036925935926`*^9, 
    3.841803706752474*^9}, {3.8418037607203846`*^9, 3.841803774188929*^9}, {
    3.8418038073567395`*^9, 3.8418038499275484`*^9}, 3.841803904405038*^9, {
    3.8418053228201857`*^9, 3.841805323938447*^9}, {3.841805430221315*^9, 
    3.841805430784861*^9}, {3.8418056712220964`*^9, 3.8418056725014286`*^9}, {
    3.841836424378595*^9, 3.8418364269817724`*^9}, {3.8418867914336452`*^9, 
    3.841886853106645*^9}, {3.841886891238326*^9, 3.8418869414298725`*^9}, {
    3.8418871779836135`*^9, 3.8418871986816463`*^9}, {3.8418872411875305`*^9, 
    3.841887251013095*^9}, {3.84188731368587*^9, 3.8418873297914915`*^9}, {
    3.8418874752412233`*^9, 3.8418874765690117`*^9}, 3.8418875913857713`*^9, {
    3.841887944680502*^9, 3.841888206986114*^9}, {3.8418882799062786`*^9, 
    3.8418882862487326`*^9}, {3.8418883519361906`*^9, 3.841888407829341*^9}, {
    3.8418884538187127`*^9, 3.8418884964492006`*^9}, {3.8420104553380365`*^9, 
    3.842010456105392*^9}, {3.842010501475397*^9, 3.8420105017222424`*^9}, 
    3.8420105393949304`*^9, {3.8466571293324575`*^9, 
    3.8466571443435946`*^9}, {3.846657370778998*^9, 3.8466574869332204`*^9}, {
    3.846657601401836*^9, 3.846657689884245*^9}, 3.846658199217289*^9, {
    3.8466582422685738`*^9, 3.8466583553051624`*^9}, {3.8466583890306325`*^9, 
    3.846658445869364*^9}, {3.8466587017050686`*^9, 3.846658727875573*^9}, {
    3.8466589044445233`*^9, 3.846658923562812*^9}, {3.8466590107398157`*^9, 
    3.846659080311597*^9}, {3.846659127976855*^9, 3.846659128101828*^9}, {
    3.8466591912168427`*^9, 3.8466592481487646`*^9}, {3.8466594766550484`*^9, 
    3.846659533599231*^9}, {3.84665958437168*^9, 3.846659863675767*^9}, {
    3.8466598938799286`*^9, 3.846660059514933*^9}, {3.846669158921476*^9, 
    3.846669160540101*^9}, {3.846669210254387*^9, 3.8466695226397595`*^9}, {
    3.8466696739300594`*^9, 3.846669700555784*^9}, {3.846669733667065*^9, 
    3.846669830943153*^9}, {3.846669942941931*^9, 3.846669970183852*^9}, {
    3.8466700023530407`*^9, 3.846670003337158*^9}, {3.846670285534099*^9, 
    3.8466702962801914`*^9}, 3.846670457513308*^9, {3.846670500562671*^9, 
    3.8466705275347214`*^9}, {3.8466707719949465`*^9, 
    3.8466708730671043`*^9}, {3.8466709531558485`*^9, 
    3.8466710349452095`*^9}, {3.8466710720817604`*^9, 3.84667111103518*^9}, {
    3.8466711412342763`*^9, 3.8466712050839252`*^9}, {3.846671240711611*^9, 
    3.846671300266326*^9}, {3.846671342372938*^9, 3.8466714524283266`*^9}, {
    3.8466715047371726`*^9, 3.846671713659568*^9}, {3.8466722931171083`*^9, 
    3.8466723395722675`*^9}, 3.846672384048112*^9, {3.846739969188094*^9, 
    3.846739972171768*^9}, 3.846745658041407*^9, 3.846746398433676*^9, {
    3.846764496223112*^9, 3.846764552952351*^9}, {3.8472766347056165`*^9, 
    3.847276669849394*^9}, {3.847276713138187*^9, 3.847276721757236*^9}, {
    3.8472770823160067`*^9, 3.8472771436873293`*^9}, {3.847277313528089*^9, 
    3.8472773203345337`*^9}, {3.847277416301323*^9, 3.8472774310812693`*^9}, {
    3.8472774750157623`*^9, 3.847277479177511*^9}, {3.8472775316318893`*^9, 
    3.8472775758940177`*^9}, {3.8472776543078303`*^9, 
    3.8472776815826125`*^9}, {3.8472820829125304`*^9, 3.847282101713642*^9}, {
    3.847282202644628*^9, 3.8472822104353604`*^9}, {3.847282267459462*^9, 
    3.847282310564173*^9}, {3.8472823596584167`*^9, 3.847282370012159*^9}, {
    3.84728242923578*^9, 3.847282460379707*^9}, 3.8472825661218014`*^9, {
    3.847282602620706*^9, 3.847282614768936*^9}, {3.847335149022919*^9, 
    3.8473351951998057`*^9}, {3.847335255588388*^9, 3.8473352622853622`*^9}, 
    3.847335299620603*^9, {3.847335579443143*^9, 3.847335608350524*^9}, {
    3.8473356424322844`*^9, 3.84733571358677*^9}, {3.8473357501219473`*^9, 
    3.8473359066759663`*^9}, {3.847336046522848*^9, 3.847336053503533*^9}, {
    3.8473361964772964`*^9, 3.847336200021795*^9}, {3.8473362736531377`*^9, 
    3.847336288747509*^9}, {3.8473481034081535`*^9, 3.8473481111240797`*^9}, {
    3.848382018287554*^9, 3.8483820505924406`*^9}, {3.8483820856130686`*^9, 
    3.8483821106696844`*^9}, {3.848382145520816*^9, 3.8483821466143074`*^9}, 
    3.848382193853175*^9, {3.8483823158244123`*^9, 3.8483823864694166`*^9}, {
    3.8483824661294794`*^9, 3.848382489858067*^9}, {3.848382561091242*^9, 
    3.848382564293646*^9}, {3.851685314669648*^9, 3.8516853345712028`*^9}, {
    3.851685467649209*^9, 3.8516855020422287`*^9}, {3.8516869238465166`*^9, 
    3.85168695982136*^9}, {3.8516872104938073`*^9, 3.8516872120405083`*^9}, {
    3.851687248756606*^9, 3.8516872707514334`*^9}, {3.8516878641505013`*^9, 
    3.8516880498282366`*^9}, {3.8516882835180893`*^9, 3.851688291032139*^9}, {
    3.851688381385642*^9, 3.85168840174336*^9}, {3.851688516903908*^9, 
    3.8516885512922974`*^9}, 3.8516888509872847`*^9, {3.8516890734305644`*^9, 
    3.8516890753207664`*^9}, 3.8517484648140383`*^9, {3.8517485281857347`*^9, 
    3.8517485619332514`*^9}, 3.8517486580512123`*^9, {3.8517513588686676`*^9, 
    3.8517514073309526`*^9}, {3.851751441541626*^9, 3.851751533068022*^9}, {
    3.851751605597808*^9, 3.851751650071472*^9}, {3.851751914649771*^9, 
    3.8517519306772113`*^9}, {3.8517539209566264`*^9, 3.851753921518944*^9}, {
    3.8517540049156313`*^9, 3.851754040623369*^9}, {3.8517541342577877`*^9, 
    3.851754134913883*^9}, {3.851755580791625*^9, 3.851755632282189*^9}, {
    3.85175566732077*^9, 3.85175576897163*^9}, {3.8517559092694125`*^9, 
    3.8517560125106993`*^9}, {3.851756148759842*^9, 3.8517561999442496`*^9}, {
    3.8517562786755133`*^9, 3.85175632121237*^9}, {3.85175638008928*^9, 
    3.8517564265781727`*^9}, {3.851756473982087*^9, 3.851756555509982*^9}, {
    3.8517565928446894`*^9, 3.851756625102707*^9}, {3.8517567124475203`*^9, 
    3.8517567340361834`*^9}, {3.851756821984413*^9, 3.8517568226248865`*^9}, {
    3.851756969730645*^9, 3.851757070910103*^9}, {3.851757110244399*^9, 
    3.851757111275406*^9}, {3.851757569353534*^9, 3.851757600992166*^9}, {
    3.851757676019738*^9, 3.85175767789157*^9}, {3.8517588302002554`*^9, 
    3.8517588878013997`*^9}, {3.851759072157569*^9, 3.85175907351406*^9}, {
    3.8517591552706633`*^9, 3.851759156705036*^9}, {3.851773137829807*^9, 
    3.851773169748623*^9}, {3.851773221229227*^9, 3.851773236357489*^9}, {
    3.8517733236279716`*^9, 3.8517733853129454`*^9}, {3.8517736188601284`*^9, 
    3.8517736258686404`*^9}, {3.8517737335668736`*^9, 3.851773738860039*^9}, 
    3.85177424731844*^9, {3.8517744746512675`*^9, 3.8517745447581444`*^9}, {
    3.851774585179755*^9, 3.851774618308499*^9}, {3.8517746807891307`*^9, 
    3.851774793080097*^9}, {3.851774873581607*^9, 3.8517749417219224`*^9}, {
    3.8517749856665754`*^9, 3.851775069507588*^9}, {3.8517774656545877`*^9, 
    3.851777466404437*^9}, {3.851777829092969*^9, 3.851777904166011*^9}, {
    3.8517781493109093`*^9, 3.8517782678252363`*^9}, {3.8517783179878016`*^9, 
    3.8517783821043415`*^9}, {3.85177841694917*^9, 3.851778454471308*^9}, {
    3.8517786093640203`*^9, 3.851778649402458*^9}, {3.851778683091739*^9, 
    3.851778693952546*^9}, 3.8517787333336506`*^9, {3.851778860073439*^9, 
    3.8517789122839394`*^9}, 3.851778952979082*^9, {3.8517791570067186`*^9, 
    3.8517791968098183`*^9}, {3.8517792312940693`*^9, 3.851779232715418*^9}, {
    3.8517792716194496`*^9, 3.851779379340855*^9}, {3.851779414021425*^9, 
    3.851779437226183*^9}, {3.8517794772943573`*^9, 3.8517795285549793`*^9}, 
    3.851779599409135*^9, {3.851947825131568*^9, 3.8519478397101264`*^9}, {
    3.8519479427752776`*^9, 3.851948080565038*^9}, {3.85194815725144*^9, 
    3.8519482112936525`*^9}, {3.8519482513071823`*^9, 3.851948300685818*^9}, {
    3.8519483467633505`*^9, 3.851948421926777*^9}, {3.854599917707138*^9, 
    3.854600013569354*^9}, {3.854712805139721*^9, 3.854712813811827*^9}, 
    3.85471512724292*^9, 3.8547154313136697`*^9, 3.854715541926668*^9, 
    3.854715944297141*^9, 3.8547754142715487`*^9, {3.8547755264962225`*^9, 
    3.8547755281675076`*^9}, {3.8547757270426426`*^9, 3.854775759334991*^9}, {
    3.8547757926492653`*^9, 3.85477579305542*^9}, {3.8547768647573757`*^9, 
    3.854776888796584*^9}, {3.8547769897774916`*^9, 3.854777019479389*^9}, {
    3.8547782128710985`*^9, 3.854778230252418*^9}, {3.8551982248697605`*^9, 
    3.855198277906287*^9}, {3.8551983360656457`*^9, 3.855198378165367*^9}, {
    3.855198503562776*^9, 3.855198531540599*^9}, {3.8551986228954463`*^9, 
    3.855198632533785*^9}, {3.8551987815217276`*^9, 3.855198791160095*^9}, {
    3.8552109863220525`*^9, 3.855210987618623*^9}, 3.855214762411118*^9, {
    3.856011846562994*^9, 3.856011846734826*^9}, 3.8560878091302457`*^9, 
    3.856087843090822*^9, {3.8560879184455433`*^9, 3.856087963059487*^9}, {
    3.8560880649683847`*^9, 3.856088202612194*^9}, 3.856088353238575*^9, {
    3.8560883909865675`*^9, 3.8560884115561733`*^9}, {3.8560884566794767`*^9, 
    3.856088466752247*^9}, {3.8560892251039495`*^9, 3.856089228351763*^9}, 
    3.8560897910955305`*^9, 3.856090309417139*^9, {3.8560904253453856`*^9, 
    3.8560904291870055`*^9}, {3.856091411499737*^9, 3.8560914171155396`*^9}, 
    3.8560914677276793`*^9, {3.8560929829811707`*^9, 
    3.8560930025763435`*^9}, {3.856093034916766*^9, 3.856093040136408*^9}, 
    3.8560936656415873`*^9, {3.8560946746845627`*^9, 3.8560947386523623`*^9}, 
    3.8560948723914704`*^9, {3.8560949180506277`*^9, 
    3.8560949209652853`*^9}, {3.8560949813293114`*^9, 
    3.8560949895195255`*^9}, {3.856096770884041*^9, 3.8560967982143965`*^9}, {
    3.8562662119601536`*^9, 3.8562662387117453`*^9}, {3.8562662738353577`*^9, 
    3.85626634798162*^9}, {3.8562664068280306`*^9, 3.8562664493400946`*^9}, {
    3.856266491656769*^9, 3.8562665542320075`*^9}, {3.8562666093858414`*^9, 
    3.856266616914109*^9}, 3.8562666503855114`*^9, 3.856266731222801*^9, {
    3.8562667623716664`*^9, 3.856266763340187*^9}, {3.856266817889781*^9, 
    3.8562669903836803`*^9}, {3.856267028970646*^9, 3.8562674280048995`*^9}, {
    3.856267489320221*^9, 3.8562675036762*^9}, {3.8562675747686973`*^9, 
    3.85626772736058*^9}, {3.856268275993417*^9, 3.856268308782513*^9}, {
    3.8562683880938034`*^9, 3.8562684345515585`*^9}, {3.856268464669392*^9, 
    3.856268483055673*^9}, {3.856268600184104*^9, 3.8562686093384027`*^9}, {
    3.8562686627942486`*^9, 3.8562686713562837`*^9}, {3.856268715189642*^9, 
    3.85626872318774*^9}, {3.8562688858849354`*^9, 3.8562689033964076`*^9}, {
    3.8562689706460557`*^9, 3.8562689783161087`*^9}, {3.8562690119511585`*^9, 
    3.856269027838032*^9}, {3.8562692047059155`*^9, 3.8562692060962067`*^9}, {
    3.8562692889079857`*^9, 3.8562692982027073`*^9}, {3.856269339677191*^9, 
    3.856269382573267*^9}, {3.856269415565442*^9, 3.856269435654676*^9}, {
    3.8562694723563094`*^9, 3.856269557617446*^9}, {3.856269592702757*^9, 
    3.8562695966393237`*^9}, {3.8562697389401054`*^9, 3.856269757199979*^9}, {
    3.8562698668960752`*^9, 3.8562698804551315`*^9}, 3.8562699452694855`*^9, {
    3.8562700055975056`*^9, 3.856270024858776*^9}, 3.856270062059145*^9, {
    3.8562701015654116`*^9, 3.856270107938883*^9}, {3.8562708100480924`*^9, 
    3.856270885842801*^9}, 3.856270961293467*^9, {3.8562711191233764`*^9, 
    3.8562711470871487`*^9}, {3.8562711940291367`*^9, 
    3.8562712004963613`*^9}, {3.8562712551100063`*^9, 
    3.8562712731059637`*^9}, {3.856271326739816*^9, 3.856271327005192*^9}, 
    3.8562715582179365`*^9, {3.85635050737883*^9, 3.8563505384237394`*^9}, {
    3.8563507814405966`*^9, 3.8563508153988123`*^9}, {3.856403365288825*^9, 
    3.8564033725059032`*^9}, 3.8564034328061533`*^9, {3.856403677833009*^9, 
    3.8564036865653663`*^9}, 3.856403890866742*^9, {3.8564041266115713`*^9, 
    3.8564041422014694`*^9}, 3.8564041731184883`*^9, {3.856416050425877*^9, 
    3.8564160637664623`*^9}, {3.856416280935495*^9, 3.856416287355866*^9}, {
    3.856416959202245*^9, 3.8564169628422403`*^9}, {3.8564170881878357`*^9, 
    3.8564170929365063`*^9}, {3.8564211371406746`*^9, 
    3.8564211381260867`*^9}, {3.8584271961336045`*^9, 3.858427205893742*^9}, 
    3.858429013129891*^9, {3.8584294949592237`*^9, 3.8584294959118695`*^9}, {
    3.858429584832994*^9, 3.8584295943151016`*^9}, 3.8584301369616175`*^9, {
    3.858430339552408*^9, 3.85843034217698*^9}, 3.8584315237909*^9, {
    3.8584315538161883`*^9, 3.858431583077695*^9}, {3.8586481763032894`*^9, 
    3.8586482132321167`*^9}, {3.8586482662196245`*^9, 
    3.8586482788262625`*^9}, {3.8586520958274355`*^9, 
    3.8586520974052067`*^9}, {3.8586521767410717`*^9, 
    3.8586522948195953`*^9}, {3.858652332447443*^9, 3.8586523344626207`*^9}, {
    3.8586524266083574`*^9, 3.858652428795418*^9}, {3.858652466641944*^9, 
    3.8586524687664547`*^9}, 3.858652635278686*^9, 3.8586526698572216`*^9, {
    3.8586527015549583`*^9, 3.8586527915947876`*^9}, {3.8586528245985355`*^9, 
    3.858652908923914*^9}, {3.8586530994435596`*^9, 3.858653197242655*^9}, {
    3.8586532352464437`*^9, 3.8586532454784384`*^9}, {3.8586534506699677`*^9, 
    3.8586535085142584`*^9}, {3.858653623629122*^9, 3.8586536312142105`*^9}, {
    3.8586545877607684`*^9, 3.858654593790846*^9}, {3.858654662936039*^9, 
    3.8586546703699636`*^9}, {3.8586551608986635`*^9, 3.858655207035569*^9}, {
    3.8586552560515184`*^9, 3.858655256691988*^9}, {3.858655294051999*^9, 
    3.8586552945676804`*^9}, {3.8586553251959395`*^9, 3.858655329055599*^9}, {
    3.8586554034905972`*^9, 3.8586554039594183`*^9}, {3.8586562167494545`*^9, 
    3.8586562419891367`*^9}, {3.858656345853464*^9, 3.8586563472281446`*^9}, {
    3.85865642554783*^9, 3.8586564274223795`*^9}, 3.858656609260376*^9, {
    3.8586567791800585`*^9, 3.8586567938415623`*^9}, {3.858656843604476*^9, 
    3.8586568448541813`*^9}, 3.858657264350212*^9, 3.8586578643727827`*^9, {
    3.8586603501435423`*^9, 3.8586603610776873`*^9}, {3.858665299710614*^9, 
    3.858665304568842*^9}, {3.85866660066634*^9, 3.858666631320428*^9}, 
    3.8588324708255205`*^9, 3.858834680023713*^9, {3.858834816319806*^9, 
    3.8588348245678115`*^9}, {3.859371068746986*^9, 3.859371071760897*^9}, {
    3.859371119092376*^9, 3.859371120263667*^9}, {3.86058476409734*^9, 
    3.860584765722186*^9}, {3.860584841536561*^9, 3.8605848473633127`*^9}, {
    3.860584881556029*^9, 3.8605849345190516`*^9}, {3.8605849810705805`*^9, 
    3.860585005457756*^9}, {3.8605850393795395`*^9, 3.8605850418789215`*^9}, {
    3.8605851656060953`*^9, 3.860585194270255*^9}, 3.86063381286031*^9, {
    3.860633853041381*^9, 3.8606338605381393`*^9}, {3.86063401668987*^9, 
    3.8606340194591556`*^9}, {3.8606344973969564`*^9, 
    3.8606345323857527`*^9}, {3.8606351162938786`*^9, 
    3.8606351169534793`*^9}, {3.860635337183052*^9, 3.860635337760549*^9}, {
    3.8606415668765078`*^9, 3.860641595432556*^9}, {3.8606478264186707`*^9, 
    3.860647827262169*^9}, {3.860652123064255*^9, 3.8606521235797577`*^9}, {
    3.860652155786443*^9, 3.8606521736104174`*^9}, 3.8606522667603283`*^9, {
    3.8606696247237062`*^9, 3.8606696733079042`*^9}, {3.860669722427417*^9, 
    3.860669749858634*^9}, {3.8606698523428307`*^9, 3.8606698539051495`*^9}, {
    3.860670121437567*^9, 3.860670162149023*^9}, {3.860670218651143*^9, 
    3.8606702191509986`*^9}, {3.860670257720063*^9, 3.8606702608755703`*^9}, 
    3.860670357321578*^9, {3.8608393202951083`*^9, 3.860839327144682*^9}, {
    3.8608395360225525`*^9, 3.860839568560756*^9}, {3.860839626109659*^9, 
    3.8608396316532125`*^9}, {3.860839972322068*^9, 3.8608399940349*^9}, {
    3.8608404196123*^9, 3.860840428309719*^9}, {3.860840480919987*^9, 
    3.860840481588693*^9}, {3.860840536412998*^9, 3.8608405379998827`*^9}, {
    3.860840633619918*^9, 3.8608406562135906`*^9}, {3.8608407583448086`*^9, 
    3.86084082336386*^9}, {3.8608409345127068`*^9, 3.8608409351678333`*^9}, {
    3.86084105988897*^9, 3.8608410940155354`*^9}, {3.8608413360670547`*^9, 
    3.8608413526004543`*^9}, {3.860841580986247*^9, 3.8608416011112056`*^9}, {
    3.8608422038020997`*^9, 3.860842221049014*^9}, {3.861189494194888*^9, 
    3.861189496865979*^9}, {3.86119056512847*^9, 3.8611905745824733`*^9}, {
    3.8623951441743917`*^9, 3.862395332697236*^9}, 3.8623954053114996`*^9, {
    3.8623954515841923`*^9, 3.862395460222004*^9}, {3.8623954945791407`*^9, 
    3.8623955137183037`*^9}, {3.8752349401678534`*^9, 3.875234961536339*^9}, 
    3.875235172904148*^9, {3.8752352398820295`*^9, 3.875235316197029*^9}, {
    3.8752353506019335`*^9, 3.8752353807075663`*^9}, {3.875235414389227*^9, 
    3.8752354566803694`*^9}, {3.875235529313761*^9, 3.8752355300012703`*^9}, {
    3.87523563456826*^9, 3.8752356645246763`*^9}, {3.875235707223446*^9, 
    3.8752359593024373`*^9}, {3.8752359934424667`*^9, 3.875236049310521*^9}, {
    3.875236294987774*^9, 3.8752363050000896`*^9}, {3.875236383458136*^9, 
    3.8752364461073356`*^9}, {3.8752364788558893`*^9, 
    3.8752365706212935`*^9}, {3.875236707214814*^9, 3.875236709583338*^9}, {
    3.8752367641977963`*^9, 3.875236843994796*^9}, {3.875236896011919*^9, 
    3.875237166046666*^9}, {3.875237235531037*^9, 3.875237251461103*^9}, {
    3.8752372851071124`*^9, 3.875237299220729*^9}, {3.8752373346031885`*^9, 
    3.875237339867747*^9}, {3.875237376370146*^9, 3.875237532572172*^9}, {
    3.8752376224386363`*^9, 3.875237718894716*^9}, {3.875237760346624*^9, 
    3.875237774849938*^9}, {3.8752378624652424`*^9, 3.875237867705207*^9}, {
    3.8752380915617523`*^9, 3.8752380974494762`*^9}, {3.8752381451223817`*^9, 
    3.8752382219509845`*^9}, {3.8752384878004336`*^9, 3.875238517872681*^9}, 
    3.875238560792837*^9, {3.875238604702647*^9, 3.875238617957013*^9}, {
    3.875238737909627*^9, 3.875238748027789*^9}, {3.8753544661404305`*^9, 
    3.8753546174521494`*^9}, {3.875354653831521*^9, 3.8753546885927687`*^9}, {
    3.875365200482809*^9, 3.8753653714892845`*^9}, {3.8753654565315585`*^9, 
    3.8753655107946672`*^9}},ExpressionUUID->
  "4ce6044c-f641-469a-8d0d-633b252eb276"]
}], "Subsection",
 CellChangeTimes->{{3.8753548389136524`*^9, 3.8753548833557987`*^9}, {
  3.8753662078353353`*^9, 
  3.87536621770676*^9}},ExpressionUUID->"338e51c4-725c-46f0-ab96-\
bcba02090773"],

Cell[CellGroupData[{

Cell[TextData[{
 StyleBox["Figure 4 (Mathematics-1964681)",
  FontWeight->"Bold"],
 ". Representative numerical (subscript ns) and approximate analytical \
(subscript n = 2) solutions of the time-dependent variation of the reaction \
rate for the substrate A undergoing disproportionation and one of the active \
enzymes states, E, of an enzyme-catalyzed ping-pong reaction in which the \
substrate-enzyme complexes do not accumulate. "
}], "Subsubsection",
 CellChangeTimes->{{3.875352757960924*^9, 3.875352842924491*^9}, {
   3.875353823083063*^9, 3.875353855802587*^9}, 3.87535475154042*^9, {
   3.8753550122960453`*^9, 3.8753550192350597`*^9}, {3.8757665167908735`*^9, 
   3.875766524056842*^9}, 
   3.876496707985092*^9},ExpressionUUID->"56765b94-8760-4926-8073-\
5fe35aabd730"],

Cell["1. Solution around t = 0", "Text",
 CellChangeTimes->{{3.8753555917630568`*^9, 
  3.875355608090945*^9}},ExpressionUUID->"8378b1e8-85fd-4885-a4fa-\
5e76bcb91c2f"],

Cell[CellGroupData[{

Cell[BoxData[{
 RowBox[{
  RowBox[{
   RowBox[{"-", 
    RowBox[{
     RowBox[{"cA", "'"}], "[", "t", "]"}]}], "\[Equal]", 
   RowBox[{
    RowBox[{"ka", "*", 
     RowBox[{"cA", "[", "t", "]"}], "*", 
     RowBox[{"cE", "[", "t", "]"}]}], "+", 
    RowBox[{"kd", "*", 
     RowBox[{"cA", "[", "t", "]"}], "*", 
     RowBox[{"cF", "[", "t", "]"}]}]}]}], "/.", 
  RowBox[{
   RowBox[{"cF", "[", "t", "]"}], "\[Rule]", 
   RowBox[{"cEo", "-", 
    RowBox[{"cE", "[", "t", "]"}]}]}]}], "\[IndentingNewLine]", 
 RowBox[{
  RowBox[{
   RowBox[{"-", 
    RowBox[{
     RowBox[{"cE", "'"}], "[", "t", "]"}]}], "\[Equal]", 
   RowBox[{
    RowBox[{"ka", "*", 
     RowBox[{"cA", "[", "t", "]"}], "*", 
     RowBox[{"cE", "[", "t", "]"}]}], "-", 
    RowBox[{"kd", "*", 
     RowBox[{"cA", "[", "t", "]"}], "*", 
     RowBox[{"cF", "[", "t", "]"}]}]}]}], "/.", 
  RowBox[{
   RowBox[{"cF", "[", "t", "]"}], "\[Rule]", 
   RowBox[{"cEo", "-", 
    RowBox[{"cE", "[", "t", "]"}]}]}]}], "\[IndentingNewLine]", 
 RowBox[{
  RowBox[{"-", 
   RowBox[{
    RowBox[{"cF", "'"}], "[", "t", "]"}]}], "\[Equal]", 
  RowBox[{
   RowBox[{"cE", "'"}], "[", "t", "]"}]}]}], "Input",
 CellChangeTimes->{{3.8753556369254107`*^9, 3.875355661898532*^9}},
 CellLabel->"In[78]:=",ExpressionUUID->"7ada4f30-3f66-4fd2-a483-3865dabbcfd6"],

Cell[BoxData[
 RowBox[{
  RowBox[{"-", 
   RowBox[{
    SuperscriptBox["cA", "\[Prime]",
     MultilineFunction->None], "[", "t", "]"}]}], "\[Equal]", 
  RowBox[{
   RowBox[{"kd", " ", 
    RowBox[{"cA", "[", "t", "]"}], " ", 
    RowBox[{"(", 
     RowBox[{"cEo", "-", 
      RowBox[{"cE", "[", "t", "]"}]}], ")"}]}], "+", 
   RowBox[{"ka", " ", 
    RowBox[{"cA", "[", "t", "]"}], " ", 
    RowBox[{"cE", "[", "t", "]"}]}]}]}]], "Output",
 CellChangeTimes->{3.8753556848611507`*^9, 3.8753599407778006`*^9},
 CellLabel->"Out[78]=",ExpressionUUID->"ae81d6e9-3c94-4a85-9f5c-9970d788b3b5"],

Cell[BoxData[
 RowBox[{
  RowBox[{"-", 
   RowBox[{
    SuperscriptBox["cE", "\[Prime]",
     MultilineFunction->None], "[", "t", "]"}]}], "\[Equal]", 
  RowBox[{
   RowBox[{
    RowBox[{"-", "kd"}], " ", 
    RowBox[{"cA", "[", "t", "]"}], " ", 
    RowBox[{"(", 
     RowBox[{"cEo", "-", 
      RowBox[{"cE", "[", "t", "]"}]}], ")"}]}], "+", 
   RowBox[{"ka", " ", 
    RowBox[{"cA", "[", "t", "]"}], " ", 
    RowBox[{"cE", "[", "t", "]"}]}]}]}]], "Output",
 CellChangeTimes->{3.8753556848611507`*^9, 3.875359940782814*^9},
 CellLabel->"Out[79]=",ExpressionUUID->"b5083463-06c6-48b2-a1fc-511992992a4f"],

Cell[BoxData[
 RowBox[{
  RowBox[{"-", 
   RowBox[{
    SuperscriptBox["cF", "\[Prime]",
     MultilineFunction->None], "[", "t", "]"}]}], "\[Equal]", 
  RowBox[{
   SuperscriptBox["cE", "\[Prime]",
    MultilineFunction->None], "[", "t", "]"}]}]], "Output",
 CellChangeTimes->{3.8753556848611507`*^9, 3.875359940785804*^9},
 CellLabel->"Out[80]=",ExpressionUUID->"871c85b1-4f63-42a7-b7ef-462e21ef5a39"]
}, Open  ]],

Cell["\<\
Chain rule
dy/dx=(dy/dt) /(dx/dt)\
\>", "Text",
 CellChangeTimes->{{3.8753557096827335`*^9, 3.875355714202396*^9}, {
  3.8753563012485294`*^9, 3.875356302468072*^9}, {3.8753563374485292`*^9, 
  3.8753563699060407`*^9}},ExpressionUUID->"a46a8a52-d088-4ea0-9903-\
0cac08d89e78"],

Cell[CellGroupData[{

Cell[BoxData[
 RowBox[{"Simplify", "[", 
  RowBox[{
   RowBox[{
    RowBox[{"-", 
     RowBox[{
      SuperscriptBox["cA", "\[Prime]",
       MultilineFunction->None], "[", "t", "]"}]}], "/", 
    RowBox[{"(", 
     RowBox[{"-", 
      RowBox[{
       SuperscriptBox["cE", "\[Prime]",
        MultilineFunction->None], "[", "t", "]"}]}], ")"}]}], "\[Equal]", 
   RowBox[{
    RowBox[{"(", 
     RowBox[{
      RowBox[{"kd", " ", 
       RowBox[{"cA", "[", "t", "]"}], " ", 
       RowBox[{"(", 
        RowBox[{"cEo", "-", 
         RowBox[{"cE", "[", "t", "]"}]}], ")"}]}], "+", 
      RowBox[{"ka", " ", 
       RowBox[{"cA", "[", "t", "]"}], " ", 
       RowBox[{"cE", "[", "t", "]"}]}]}], ")"}], "/", 
    RowBox[{"(", 
     RowBox[{
      RowBox[{
       RowBox[{"-", "kd"}], " ", 
       RowBox[{"cA", "[", "t", "]"}], " ", 
       RowBox[{"(", 
        RowBox[{"cEo", "-", 
         RowBox[{"cE", "[", "t", "]"}]}], ")"}]}], "+", 
      RowBox[{"ka", " ", 
       RowBox[{"cA", "[", "t", "]"}], " ", 
       RowBox[{"cE", "[", "t", "]"}]}]}], ")"}]}]}], "]"}]], "Input",
 CellChangeTimes->{{3.875355926677122*^9, 3.875355930160171*^9}},
 CellLabel->"In[64]:=",ExpressionUUID->"7523eccf-e649-4f19-8452-5902cea8a0be"],

Cell[BoxData[
 RowBox[{
  RowBox[{
   FractionBox[
    RowBox[{
     RowBox[{"cEo", " ", "kd"}], "+", 
     RowBox[{
      RowBox[{"(", 
       RowBox[{"ka", "-", "kd"}], ")"}], " ", 
      RowBox[{"cE", "[", "t", "]"}]}]}], 
    RowBox[{
     RowBox[{"cEo", " ", "kd"}], "-", 
     RowBox[{
      RowBox[{"(", 
       RowBox[{"ka", "+", "kd"}], ")"}], " ", 
      RowBox[{"cE", "[", "t", "]"}]}]}]], "+", 
   FractionBox[
    RowBox[{
     SuperscriptBox["cA", "\[Prime]",
      MultilineFunction->None], "[", "t", "]"}], 
    RowBox[{
     SuperscriptBox["cE", "\[Prime]",
      MultilineFunction->None], "[", "t", "]"}]]}], "\[Equal]", 
  "0"}]], "Output",
 CellChangeTimes->{3.8753559350892816`*^9},
 CellLabel->"Out[64]=",ExpressionUUID->"cc9da830-b0ae-4ac6-b25a-155203e4d806"]
}, Open  ]],

Cell[CellGroupData[{

Cell[BoxData[
 RowBox[{"Collect", "[", 
  RowBox[{
   RowBox[{
    RowBox[{"Simplify", "[", 
     RowBox[{
      RowBox[{"DSolve", "[", 
       RowBox[{
        RowBox[{"{", 
         RowBox[{
          RowBox[{
           RowBox[{"-", 
            RowBox[{
             SuperscriptBox["cA", "\[Prime]",
              MultilineFunction->None], "[", "cE", "]"}]}], "\[Equal]", 
           FractionBox[
            RowBox[{
             RowBox[{"cE", " ", 
              RowBox[{"(", 
               RowBox[{"ka", "-", "kd"}], ")"}]}], "+", 
             RowBox[{"cEo", " ", "kd"}]}], 
            RowBox[{
             RowBox[{"cEo", " ", "kd"}], "-", 
             RowBox[{"cE", " ", 
              RowBox[{"(", 
               RowBox[{"ka", "+", "kd"}], ")"}]}]}]]}], ",", 
          RowBox[{
           RowBox[{"cA", "[", "cEo", "]"}], "\[Equal]", "cAo"}]}], "}"}], ",", 
        RowBox[{"cA", "[", "cE", "]"}], ",", "cE"}], "]"}], ",", 
      RowBox[{
       RowBox[{"ka", ">", "0"}], "&&", 
       RowBox[{"kd", ">", "0"}], "&&", 
       RowBox[{"cEo", ">", "0"}], "&&", 
       RowBox[{"cAo", ">", "0"}]}]}], "]"}], "/.", 
    RowBox[{"cE", "\[Rule]", 
     RowBox[{"cE", "[", "t", "]"}]}]}], ",", 
   RowBox[{"ka", "+", "kd"}]}], "]"}]], "Input",
 CellChangeTimes->{{3.875356163433436*^9, 3.8753562238460293`*^9}, {
  3.8753578457214003`*^9, 3.8753578877153025`*^9}, {3.875358154615006*^9, 
  3.8753581658681536`*^9}, {3.8753592671142235`*^9, 3.8753592751032877`*^9}, {
  3.8753593466880283`*^9, 3.875359381089764*^9}, {3.8753594908967743`*^9, 
  3.8753595138684654`*^9}},
 CellLabel->"In[73]:=",ExpressionUUID->"1ea71ac1-7bdd-4cbe-a7a4-a4c17d5d3ff1"],

Cell[BoxData[
 RowBox[{"{", 
  RowBox[{"{", 
   RowBox[{
    RowBox[{"cA", "[", 
     RowBox[{"cE", "[", "t", "]"}], "]"}], "\[Rule]", 
    RowBox[{"cAo", "+", 
     FractionBox[
      RowBox[{
       RowBox[{"(", 
        RowBox[{"ka", "-", "kd"}], ")"}], " ", 
       RowBox[{"(", 
        RowBox[{
         RowBox[{"-", "cEo"}], "+", 
         RowBox[{"cE", "[", "t", "]"}]}], ")"}]}], 
      RowBox[{"ka", "+", "kd"}]], "+", 
     FractionBox[
      RowBox[{
       RowBox[{
        RowBox[{"-", "2"}], " ", "cEo", " ", "ka", " ", "kd", " ", 
        RowBox[{"Log", "[", 
         RowBox[{"cEo", " ", "ka"}], "]"}]}], "+", 
       RowBox[{"2", " ", "cEo", " ", "ka", " ", "kd", " ", 
        RowBox[{"Log", "[", 
         RowBox[{
          RowBox[{
           RowBox[{"-", "cEo"}], " ", "kd"}], "+", 
          RowBox[{
           RowBox[{"(", 
            RowBox[{"ka", "+", "kd"}], ")"}], " ", 
           RowBox[{"cE", "[", "t", "]"}]}]}], "]"}]}]}], 
      SuperscriptBox[
       RowBox[{"(", 
        RowBox[{"ka", "+", "kd"}], ")"}], "2"]]}]}], "}"}], "}"}]], "Output",
 CellChangeTimes->{3.8753561475902762`*^9, 3.8753562273990955`*^9, 
  3.8753578960018797`*^9, 3.8753581678931675`*^9, 3.875359276626365*^9, 
  3.875359353796486*^9, 3.8753594764013762`*^9, 3.875359529306636*^9},
 CellLabel->"Out[73]=",ExpressionUUID->"6400b50f-9689-4259-8d36-820dfec592e7"]
}, Open  ]],

Cell[CellGroupData[{

Cell[BoxData[
 RowBox[{"Simplify", "[", 
  RowBox[{
   RowBox[{
    RowBox[{"-", 
     RowBox[{
      SuperscriptBox["cE", "\[Prime]",
       MultilineFunction->None], "[", "t", "]"}]}], "\[Equal]", 
    RowBox[{
     RowBox[{
      RowBox[{"-", "kd"}], " ", 
      RowBox[{"cA", "[", "t", "]"}], " ", 
      RowBox[{"(", 
       RowBox[{"cEo", "-", 
        RowBox[{"cE", "[", "t", "]"}]}], ")"}]}], "+", 
     RowBox[{"ka", " ", 
      RowBox[{"cA", "[", "t", "]"}], " ", 
      RowBox[{"cE", "[", "t", "]"}]}]}]}], "/.", 
   RowBox[{
    RowBox[{"cA", "[", "t", "]"}], "->", 
    RowBox[{"cAo", "+", 
     FractionBox[
      RowBox[{
       RowBox[{"(", 
        RowBox[{"ka", "-", "kd"}], ")"}], " ", 
       RowBox[{"(", 
        RowBox[{
         RowBox[{"-", "cEo"}], "+", 
         RowBox[{"cE", "[", "t", "]"}]}], ")"}]}], 
      RowBox[{"ka", "+", "kd"}]], "+", 
     FractionBox[
      RowBox[{
       RowBox[{
        RowBox[{"-", "2"}], " ", "cEo", " ", "ka", " ", "kd", " ", 
        RowBox[{"Log", "[", 
         RowBox[{"cEo", " ", "ka"}], "]"}]}], "+", 
       RowBox[{"2", " ", "cEo", " ", "ka", " ", "kd", " ", 
        RowBox[{"Log", "[", 
         RowBox[{
          RowBox[{
           RowBox[{"-", "cEo"}], " ", "kd"}], "+", 
          RowBox[{
           RowBox[{"(", 
            RowBox[{"ka", "+", "kd"}], ")"}], " ", 
           RowBox[{"cE", "[", "t", "]"}]}]}], "]"}]}]}], 
      SuperscriptBox[
       RowBox[{"(", 
        RowBox[{"ka", "+", "kd"}], ")"}], "2"]]}]}]}], "]"}]], "Input",
 CellChangeTimes->{{3.8753585878828583`*^9, 3.875358625587867*^9}, 
   3.8753595747305346`*^9, {3.8753596058128653`*^9, 3.875359645939361*^9}, 
   3.87535995655711*^9},
 CellLabel->"In[81]:=",ExpressionUUID->"6b994a7a-de0f-46de-8af5-38310916fd77"],

Cell[BoxData[
 RowBox[{
  RowBox[{
   FractionBox["1", 
    SuperscriptBox[
     RowBox[{"(", 
      RowBox[{"ka", "+", "kd"}], ")"}], "2"]], 
   RowBox[{
    RowBox[{"(", 
     RowBox[{
      RowBox[{"cEo", " ", "kd"}], "-", 
      RowBox[{
       RowBox[{"(", 
        RowBox[{"ka", "+", "kd"}], ")"}], " ", 
       RowBox[{"cE", "[", "t", "]"}]}]}], ")"}], " ", 
    RowBox[{"(", 
     RowBox[{
      RowBox[{"cAo", " ", 
       SuperscriptBox["ka", "2"]}], "-", 
      RowBox[{"cEo", " ", 
       SuperscriptBox["ka", "2"]}], "+", 
      RowBox[{"2", " ", "cAo", " ", "ka", " ", "kd"}], "+", 
      RowBox[{"cAo", " ", 
       SuperscriptBox["kd", "2"]}], "+", 
      RowBox[{"cEo", " ", 
       SuperscriptBox["kd", "2"]}], "+", 
      RowBox[{
       RowBox[{"(", 
        RowBox[{
         SuperscriptBox["ka", "2"], "-", 
         SuperscriptBox["kd", "2"]}], ")"}], " ", 
       RowBox[{"cE", "[", "t", "]"}]}], "-", 
      RowBox[{"2", " ", "cEo", " ", "ka", " ", "kd", " ", 
       RowBox[{"Log", "[", 
        RowBox[{"cEo", " ", "ka"}], "]"}]}], "+", 
      RowBox[{"2", " ", "cEo", " ", "ka", " ", "kd", " ", 
       RowBox[{"Log", "[", 
        RowBox[{
         RowBox[{
          RowBox[{"-", "cEo"}], " ", "kd"}], "+", 
         RowBox[{
          RowBox[{"(", 
           RowBox[{"ka", "+", "kd"}], ")"}], " ", 
          RowBox[{"cE", "[", "t", "]"}]}]}], "]"}]}]}], ")"}]}]}], "\[Equal]", 
  RowBox[{
   SuperscriptBox["cE", "\[Prime]",
    MultilineFunction->None], "[", "t", "]"}]}]], "Output",
 CellChangeTimes->{3.8753586281710095`*^9, 3.875359583368017*^9, 
  3.875359627065186*^9, 3.8753596967030983`*^9, 3.875359961381071*^9},
 CellLabel->"Out[81]=",ExpressionUUID->"7231c765-93bf-4569-a2ba-7fe7583116d2"]
}, Open  ]],

Cell[" Power expansion series", "Text",
 CellChangeTimes->{{3.8753602007082877`*^9, 
  3.8753602118812475`*^9}},ExpressionUUID->"14b9b60f-69db-470c-9dfd-\
9e270ae521e4"],

Cell[CellGroupData[{

Cell[BoxData[
 RowBox[{"Series", "[", 
  RowBox[{
   RowBox[{
    RowBox[{
     FractionBox["1", 
      SuperscriptBox[
       RowBox[{"(", 
        RowBox[{"ka", "+", "kd"}], ")"}], "2"]], 
     RowBox[{"(", 
      RowBox[{
       RowBox[{"cEo", " ", "kd"}], "-", 
       RowBox[{
        RowBox[{"(", 
         RowBox[{"ka", "+", "kd"}], ")"}], " ", 
        RowBox[{"cE", "[", "t", "]"}]}]}], ")"}], " ", 
     RowBox[{"(", 
      RowBox[{
       RowBox[{"cAo", " ", 
        SuperscriptBox["ka", "2"]}], "-", 
       RowBox[{"cEo", " ", 
        SuperscriptBox["ka", "2"]}], "+", 
       RowBox[{"2", " ", "cAo", " ", "ka", " ", "kd"}], "+", 
       RowBox[{"cAo", " ", 
        SuperscriptBox["kd", "2"]}], "+", 
       RowBox[{"cEo", " ", 
        SuperscriptBox["kd", "2"]}], "+", 
       RowBox[{
        RowBox[{"(", 
         RowBox[{
          SuperscriptBox["ka", "2"], "-", 
          SuperscriptBox["kd", "2"]}], ")"}], " ", 
        RowBox[{"cE", "[", "t", "]"}]}], "-", 
       RowBox[{"2", " ", "cEo", " ", "ka", " ", "kd", " ", 
        RowBox[{"Log", "[", 
         RowBox[{"cEo", " ", "ka"}], "]"}]}], "+", 
       RowBox[{"2", " ", "cEo", " ", "ka", " ", "kd", " ", 
        RowBox[{"Log", "[", 
         RowBox[{
          RowBox[{
           RowBox[{"-", "cEo"}], " ", "kd"}], "+", 
          RowBox[{
           RowBox[{"(", 
            RowBox[{"ka", "+", "kd"}], ")"}], " ", 
           RowBox[{"cE", "[", "t", "]"}]}]}], "]"}]}]}], ")"}]}], "\[Equal]", 
    RowBox[{
     SuperscriptBox["cE", "\[Prime]",
      MultilineFunction->None], "[", "t", "]"}]}], ",", 
   RowBox[{"{", 
    RowBox[{
     RowBox[{"cE", "[", "t", "]"}], ",", "cEo", ",", "1"}], "}"}]}], 
  "]"}]], "Input",
 CellChangeTimes->{
  3.8753598983261323`*^9, 3.8753599835268784`*^9, {3.875360659133292*^9, 
   3.8753606736748695`*^9}, {3.8753607165665307`*^9, 3.8753607220350995`*^9}},
 CellLabel->"In[90]:=",ExpressionUUID->"5886b84e-a800-4a8a-96b8-c7935db4eb43"],

Cell[BoxData[
 RowBox[{
  InterpretationBox[
   RowBox[{
    RowBox[{"-", 
     RowBox[{"cAo", " ", "cEo", " ", "ka"}]}], "+", 
    RowBox[{
     RowBox[{"(", 
      RowBox[{
       RowBox[{
        RowBox[{"-", "cAo"}], " ", "ka"}], "-", 
       RowBox[{"cEo", " ", "ka"}], "-", 
       RowBox[{"cAo", " ", "kd"}]}], ")"}], " ", 
     RowBox[{"(", 
      RowBox[{
       RowBox[{"cE", "[", "t", "]"}], "-", "cEo"}], ")"}]}], "+", 
    InterpretationBox[
     SuperscriptBox[
      RowBox[{"O", "[", 
       RowBox[{
        RowBox[{"cE", "[", "t", "]"}], "-", "cEo"}], "]"}], "2"],
     SeriesData[
      $CellContext`cE[$CellContext`t], $CellContext`cEo, {}, 0, 2, 1],
     Editable->False]}],
   SeriesData[
    $CellContext`cE[$CellContext`t], $CellContext`cEo, {-$CellContext`cAo \
$CellContext`cEo $CellContext`ka, -$CellContext`cAo $CellContext`ka - \
$CellContext`cEo $CellContext`ka - $CellContext`cAo $CellContext`kd}, 0, 2, 1],
   Editable->False], "\[Equal]", 
  RowBox[{
   SuperscriptBox["cE", "\[Prime]",
    MultilineFunction->None], "[", "t", "]"}]}]], "Output",
 CellChangeTimes->{3.875359902033838*^9, 3.8753599873308945`*^9, 
  3.8753605972790856`*^9, 3.8753606760843143`*^9, 3.8753607235814457`*^9},
 CellLabel->"Out[90]=",ExpressionUUID->"9d566570-b18b-47e8-b4dd-69b325cdf487"]
}, Open  ]],

Cell[CellGroupData[{

Cell[BoxData[
 RowBox[{"Series", "[", 
  RowBox[{
   RowBox[{
    RowBox[{
     FractionBox["1", 
      SuperscriptBox[
       RowBox[{"(", 
        RowBox[{"ka", "+", "kd"}], ")"}], "2"]], 
     RowBox[{"(", 
      RowBox[{
       RowBox[{"cEo", " ", "kd"}], "-", 
       RowBox[{
        RowBox[{"(", 
         RowBox[{"ka", "+", "kd"}], ")"}], " ", 
        RowBox[{"cE", "[", "t", "]"}]}]}], ")"}], " ", 
     RowBox[{"(", 
      RowBox[{
       RowBox[{"cAo", " ", 
        SuperscriptBox["ka", "2"]}], "-", 
       RowBox[{"cEo", " ", 
        SuperscriptBox["ka", "2"]}], "+", 
       RowBox[{"2", " ", "cAo", " ", "ka", " ", "kd"}], "+", 
       RowBox[{"cAo", " ", 
        SuperscriptBox["kd", "2"]}], "+", 
       RowBox[{"cEo", " ", 
        SuperscriptBox["kd", "2"]}], "+", 
       RowBox[{
        RowBox[{"(", 
         RowBox[{
          SuperscriptBox["ka", "2"], "-", 
          SuperscriptBox["kd", "2"]}], ")"}], " ", 
        RowBox[{"cE", "[", "t", "]"}]}], "-", 
       RowBox[{"2", " ", "cEo", " ", "ka", " ", "kd", " ", 
        RowBox[{"Log", "[", 
         RowBox[{"cEo", " ", "ka"}], "]"}]}], "+", 
       RowBox[{"2", " ", "cEo", " ", "ka", " ", "kd", " ", 
        RowBox[{"Log", "[", 
         RowBox[{
          RowBox[{
           RowBox[{"-", "cEo"}], " ", "kd"}], "+", 
          RowBox[{
           RowBox[{"(", 
            RowBox[{"ka", "+", "kd"}], ")"}], " ", 
           RowBox[{"cE", "[", "t", "]"}]}]}], "]"}]}]}], ")"}]}], "\[Equal]", 
    RowBox[{
     SuperscriptBox["cE", "\[Prime]",
      MultilineFunction->None], "[", "t", "]"}]}], ",", 
   RowBox[{"{", 
    RowBox[{
     RowBox[{"cE", "[", "t", "]"}], ",", "cEo", ",", "2"}], "}"}]}], 
  "]"}]], "Input",
 CellChangeTimes->{
  3.87536000688461*^9, {3.8753603579395723`*^9, 3.8753603611905704`*^9}},
 CellLabel->"In[91]:=",ExpressionUUID->"fb6de867-1b28-4192-885f-66a9d12b43b1"],

Cell[BoxData[
 RowBox[{
  InterpretationBox[
   RowBox[{
    RowBox[{"-", 
     RowBox[{"cAo", " ", "cEo", " ", "ka"}]}], "+", 
    RowBox[{
     RowBox[{"(", 
      RowBox[{
       RowBox[{
        RowBox[{"-", "cAo"}], " ", "ka"}], "-", 
       RowBox[{"cEo", " ", "ka"}], "-", 
       RowBox[{"cAo", " ", "kd"}]}], ")"}], " ", 
     RowBox[{"(", 
      RowBox[{
       RowBox[{"cE", "[", "t", "]"}], "-", "cEo"}], ")"}]}], "-", 
    RowBox[{"ka", " ", 
     SuperscriptBox[
      RowBox[{"(", 
       RowBox[{
        RowBox[{"cE", "[", "t", "]"}], "-", "cEo"}], ")"}], "2"]}], "+", 
    InterpretationBox[
     SuperscriptBox[
      RowBox[{"O", "[", 
       RowBox[{
        RowBox[{"cE", "[", "t", "]"}], "-", "cEo"}], "]"}], "3"],
     SeriesData[
      $CellContext`cE[$CellContext`t], $CellContext`cEo, {}, 0, 3, 1],
     Editable->False]}],
   SeriesData[
    $CellContext`cE[$CellContext`t], $CellContext`cEo, {-$CellContext`cAo \
$CellContext`cEo $CellContext`ka, -$CellContext`cAo $CellContext`ka - \
$CellContext`cEo $CellContext`ka - $CellContext`cAo $CellContext`kd, \
-$CellContext`ka}, 0, 3, 1],
   Editable->False], "\[Equal]", 
  RowBox[{
   SuperscriptBox["cE", "\[Prime]",
    MultilineFunction->None], "[", "t", "]"}]}]], "Output",
 CellChangeTimes->{3.875360008877165*^9, 3.8753607335880394`*^9},
 CellLabel->"Out[91]=",ExpressionUUID->"cac059ba-f086-4ef7-badf-e1b3e020fbe8"]
}, Open  ]],

Cell[CellGroupData[{

Cell[BoxData[
 RowBox[{"cEn1", "=", 
  RowBox[{"Simplify", "[", 
   RowBox[{"DSolve", "[", 
    RowBox[{
     RowBox[{"{", 
      RowBox[{
       RowBox[{
        RowBox[{
         RowBox[{
          RowBox[{"-", "cAo"}], " ", "cEo", " ", "ka"}], "+", 
         RowBox[{
          RowBox[{"(", 
           RowBox[{
            RowBox[{
             RowBox[{"-", "cAo"}], " ", "ka"}], "-", 
            RowBox[{"cEo", " ", "ka"}], "-", 
            RowBox[{"cAo", " ", "kd"}]}], ")"}], " ", 
          RowBox[{"(", 
           RowBox[{
            RowBox[{"cE", "[", "t", "]"}], "-", "cEo"}], ")"}]}]}], 
        "\[Equal]", 
        RowBox[{
         RowBox[{"cE", "'"}], "[", "t", "]"}]}], ",", 
       RowBox[{
        RowBox[{"cE", "[", "0", "]"}], "\[Equal]", "cEo"}]}], "}"}], ",", 
     RowBox[{"cE", "[", "t", "]"}], ",", "t"}], "]"}], "]"}]}]], "Input",
 CellChangeTimes->{{3.8753608126239347`*^9, 3.875360879451696*^9}, {
  3.8753610114766765`*^9, 3.8753610182030683`*^9}, {3.875363304307906*^9, 
  3.875363312177684*^9}},
 CellLabel->
  "In[114]:=",ExpressionUUID->"17c13035-6a0b-48c7-8b28-955d25a815a3"],

Cell[BoxData[
 RowBox[{"{", 
  RowBox[{"{", 
   RowBox[{
    RowBox[{"cE", "[", "t", "]"}], "\[Rule]", 
    FractionBox[
     RowBox[{"cEo", " ", 
      RowBox[{"(", 
       RowBox[{
        RowBox[{"cEo", " ", "ka"}], "+", 
        RowBox[{"cAo", " ", 
         RowBox[{"(", 
          RowBox[{
           RowBox[{
            SuperscriptBox["\[ExponentialE]", 
             RowBox[{"-", 
              RowBox[{"(", 
               RowBox[{
                RowBox[{"(", 
                 RowBox[{
                  RowBox[{"cEo", " ", "ka"}], "+", 
                  RowBox[{"cAo", " ", 
                   RowBox[{"(", 
                    RowBox[{"ka", "+", "kd"}], ")"}]}]}], ")"}], " ", "t"}], 
               ")"}]}]], " ", "ka"}], "+", "kd"}], ")"}]}]}], ")"}]}], 
     RowBox[{
      RowBox[{"cEo", " ", "ka"}], "+", 
      RowBox[{"cAo", " ", 
       RowBox[{"(", 
        RowBox[{"ka", "+", "kd"}], ")"}]}]}]]}], "}"}], "}"}]], "Output",
 CellChangeTimes->{3.8753608509513655`*^9, 3.875360882675726*^9, 
  3.8753610200649815`*^9, 3.8753633188748875`*^9},
 CellLabel->
  "Out[114]=",ExpressionUUID->"77e43691-1c7e-4e9e-8339-50c3d93601c7"]
}, Open  ]],

Cell[CellGroupData[{

Cell[BoxData[
 RowBox[{"cAn1", "=", 
  RowBox[{"Simplify", "[", 
   RowBox[{
    RowBox[{
     RowBox[{
      RowBox[{"cA", "[", "t", "]"}], "\[Equal]", 
      RowBox[{"cAo", "+", 
       FractionBox[
        RowBox[{
         RowBox[{"(", 
          RowBox[{"ka", "-", "kd"}], ")"}], " ", 
         RowBox[{"(", 
          RowBox[{
           RowBox[{"-", "cEo"}], "+", 
           RowBox[{"cE", "[", "t", "]"}]}], ")"}]}], 
        RowBox[{"ka", "+", "kd"}]], "+", 
       FractionBox[
        RowBox[{
         RowBox[{
          RowBox[{"-", "2"}], " ", "cEo", " ", "ka", " ", "kd", " ", 
          RowBox[{"Log", "[", 
           RowBox[{"cEo", " ", "ka"}], "]"}]}], "+", 
         RowBox[{"2", " ", "cEo", " ", "ka", " ", "kd", " ", 
          RowBox[{"Log", "[", 
           RowBox[{
            RowBox[{
             RowBox[{"-", "cEo"}], " ", "kd"}], "+", 
            RowBox[{
             RowBox[{"(", 
              RowBox[{"ka", "+", "kd"}], ")"}], " ", 
             RowBox[{"cE", "[", "t", "]"}]}]}], "]"}]}]}], 
        SuperscriptBox[
         RowBox[{"(", 
          RowBox[{"ka", "+", "kd"}], ")"}], "2"]]}]}], "/.", 
     RowBox[{
      RowBox[{"cE", "[", "t", "]"}], "\[Rule]", 
      FractionBox[
       RowBox[{"cEo", " ", 
        RowBox[{"(", 
         RowBox[{
          RowBox[{"cEo", " ", "ka"}], "+", 
          RowBox[{"cAo", " ", 
           RowBox[{"(", 
            RowBox[{
             RowBox[{
              SuperscriptBox["\[ExponentialE]", 
               RowBox[{"-", 
                RowBox[{"(", 
                 RowBox[{
                  RowBox[{"(", 
                   RowBox[{
                    RowBox[{"cEo", " ", "ka"}], "+", 
                    RowBox[{"cAo", " ", 
                    RowBox[{"(", 
                    RowBox[{"ka", "+", "kd"}], ")"}]}]}], ")"}], " ", "t"}], 
                 ")"}]}]], " ", "ka"}], "+", "kd"}], ")"}]}]}], ")"}]}], 
       RowBox[{
        RowBox[{"cEo", " ", "ka"}], "+", 
        RowBox[{"cAo", " ", 
         RowBox[{"(", 
          RowBox[{"ka", "+", "kd"}], ")"}]}]}]]}]}], ",", 
    RowBox[{
     RowBox[{"ka", ">", "0"}], "&&", 
     RowBox[{"kd", ">", "0"}], "&&", 
     RowBox[{"cAo", ">", "0"}], "&&", 
     RowBox[{"cEo", ">", "0"}]}]}], "]"}]}]], "Input",
 CellChangeTimes->{{3.875361041019724*^9, 3.8753610876025295`*^9}, {
  3.875361146222379*^9, 3.875361149915874*^9}, {3.8753633381773577`*^9, 
  3.875363342451742*^9}},
 CellLabel->
  "In[115]:=",ExpressionUUID->"d8267622-edd8-4319-9c33-ffc4c64eea80"],

Cell[BoxData[
 RowBox[{
  RowBox[{"cA", "[", "t", "]"}], "\[Equal]", 
  RowBox[{"cAo", "+", 
   FractionBox[
    RowBox[{"cEo", " ", 
     RowBox[{"(", 
      RowBox[{"ka", "-", "kd"}], ")"}], " ", 
     RowBox[{"(", 
      RowBox[{
       RowBox[{"-", "1"}], "+", 
       FractionBox[
        RowBox[{
         RowBox[{"cEo", " ", "ka"}], "+", 
         RowBox[{"cAo", " ", 
          RowBox[{"(", 
           RowBox[{
            RowBox[{
             SuperscriptBox["\[ExponentialE]", 
              RowBox[{"-", 
               RowBox[{"(", 
                RowBox[{
                 RowBox[{"(", 
                  RowBox[{
                   RowBox[{"cEo", " ", "ka"}], "+", 
                   RowBox[{"cAo", " ", 
                    RowBox[{"(", 
                    RowBox[{"ka", "+", "kd"}], ")"}]}]}], ")"}], " ", "t"}], 
                ")"}]}]], " ", "ka"}], "+", "kd"}], ")"}]}]}], 
        RowBox[{
         RowBox[{"cEo", " ", "ka"}], "+", 
         RowBox[{"cAo", " ", 
          RowBox[{"(", 
           RowBox[{"ka", "+", "kd"}], ")"}]}]}]]}], ")"}]}], 
    RowBox[{"ka", "+", "kd"}]], "+", 
   FractionBox[
    RowBox[{"2", " ", "cEo", " ", "ka", " ", "kd", " ", 
     RowBox[{"Log", "[", 
      FractionBox[
       RowBox[{
        RowBox[{"cEo", " ", "ka"}], "+", 
        RowBox[{"cAo", " ", 
         SuperscriptBox["\[ExponentialE]", 
          RowBox[{"-", 
           RowBox[{"(", 
            RowBox[{
             RowBox[{"(", 
              RowBox[{
               RowBox[{"cEo", " ", "ka"}], "+", 
               RowBox[{"cAo", " ", 
                RowBox[{"(", 
                 RowBox[{"ka", "+", "kd"}], ")"}]}]}], ")"}], " ", "t"}], 
            ")"}]}]], " ", 
         RowBox[{"(", 
          RowBox[{"ka", "+", "kd"}], ")"}]}]}], 
       RowBox[{
        RowBox[{"cEo", " ", "ka"}], "+", 
        RowBox[{"cAo", " ", 
         RowBox[{"(", 
          RowBox[{"ka", "+", "kd"}], ")"}]}]}]], "]"}]}], 
    SuperscriptBox[
     RowBox[{"(", 
      RowBox[{"ka", "+", "kd"}], ")"}], "2"]]}]}]], "Output",
 CellChangeTimes->{3.875361090096078*^9, 3.875361152744096*^9, 
  3.875362574976542*^9, 3.8753633473366823`*^9},
 CellLabel->
  "Out[115]=",ExpressionUUID->"03e4a1cd-0972-4cae-8071-8fcf6f4e46e9"]
}, Open  ]],

Cell[CellGroupData[{

Cell[BoxData[
 RowBox[{"cEn2", "=", 
  RowBox[{"Simplify", "[", 
   RowBox[{
    RowBox[{"DSolve", "[", 
     RowBox[{
      RowBox[{"{", 
       RowBox[{
        RowBox[{
         RowBox[{
          RowBox[{
           RowBox[{"-", "cAo"}], " ", "cEo", " ", "ka"}], "+", 
          RowBox[{
           RowBox[{"(", 
            RowBox[{
             RowBox[{
              RowBox[{"-", "cAo"}], " ", "ka"}], "-", 
             RowBox[{"cEo", " ", "ka"}], "-", 
             RowBox[{"cAo", " ", "kd"}]}], ")"}], " ", 
           RowBox[{"(", 
            RowBox[{
             RowBox[{"cE", "[", "t", "]"}], "-", "cEo"}], ")"}]}], "-", 
          RowBox[{"ka", " ", 
           SuperscriptBox[
            RowBox[{"(", 
             RowBox[{
              RowBox[{"cE", "[", "t", "]"}], "-", "cEo"}], ")"}], "2"]}]}], 
         "\[Equal]", 
         RowBox[{
          SuperscriptBox["cE", "\[Prime]",
           MultilineFunction->None], "[", "t", "]"}]}], ",", 
        RowBox[{
         RowBox[{"cE", "[", "0", "]"}], "\[Equal]", "cEo"}]}], "}"}], ",", 
      RowBox[{"cE", "[", "t", "]"}], ",", "t"}], "]"}], ",", 
    RowBox[{
     RowBox[{"ka", ">", "0"}], "&&", 
     RowBox[{"kd", ">", "0"}], "&&", 
     RowBox[{"cAo", ">", "0"}], "&&", 
     RowBox[{"cEo", ">", "0"}]}]}], "]"}]}]], "Input",
 CellChangeTimes->{
  3.8753613222000403`*^9, {3.875361365136136*^9, 3.8753614017709317`*^9}, {
   3.875361625023596*^9, 3.875361645636961*^9}, {3.875361683444808*^9, 
   3.8753616936729245`*^9}, {3.8753633654442987`*^9, 3.8753633717041717`*^9}},
 CellLabel->
  "In[116]:=",ExpressionUUID->"0a523133-bf80-4a1b-9b7a-edeb7bbe82c8"],

Cell[BoxData[
 TemplateBox[{
  "Solve", "ifun", 
   "\"Inverse functions are being used by \
\\!\\(\\*RowBox[{\\\"Solve\\\"}]\\), so some solutions may not be found; use \
Reduce for complete solution information.\"", 2, 116, 528, 
   20084497198144860477, "Local"},
  "MessageTemplate"]], "Message", "MSG",
 CellChangeTimes->{3.875361405334442*^9, 3.8753616496230803`*^9, 
  3.875361698313966*^9, 3.875363375427272*^9},
 CellLabel->
  "During evaluation of \
In[116]:=",ExpressionUUID->"e259fb4b-ba19-4d98-845f-d904e6b7a11a"],

Cell[BoxData[
 RowBox[{"{", 
  RowBox[{"{", 
   RowBox[{
    RowBox[{"cE", "[", "t", "]"}], "\[Rule]", 
    RowBox[{
     FractionBox["1", 
      RowBox[{"2", " ", "ka"}]], 
     RowBox[{"(", 
      RowBox[{
       RowBox[{"cEo", " ", "ka"}], "-", 
       RowBox[{"cAo", " ", 
        RowBox[{"(", 
         RowBox[{"ka", "+", "kd"}], ")"}]}], "+", 
       RowBox[{
        SqrtBox[
         RowBox[{
          RowBox[{
           SuperscriptBox["cEo", "2"], " ", 
           SuperscriptBox["ka", "2"]}], "+", 
          RowBox[{"2", " ", "cAo", " ", "cEo", " ", "ka", " ", 
           RowBox[{"(", 
            RowBox[{
             RowBox[{"-", "ka"}], "+", "kd"}], ")"}]}], "+", 
          RowBox[{
           SuperscriptBox["cAo", "2"], " ", 
           SuperscriptBox[
            RowBox[{"(", 
             RowBox[{"ka", "+", "kd"}], ")"}], "2"]}]}]], " ", 
        RowBox[{"Tanh", "[", 
         RowBox[{
          RowBox[{
           FractionBox["1", "2"], " ", 
           SqrtBox[
            RowBox[{
             RowBox[{
              SuperscriptBox["cEo", "2"], " ", 
              SuperscriptBox["ka", "2"]}], "+", 
             RowBox[{"2", " ", "cAo", " ", "cEo", " ", "ka", " ", 
              RowBox[{"(", 
               RowBox[{
                RowBox[{"-", "ka"}], "+", "kd"}], ")"}]}], "+", 
             RowBox[{
              SuperscriptBox["cAo", "2"], " ", 
              SuperscriptBox[
               RowBox[{"(", 
                RowBox[{"ka", "+", "kd"}], ")"}], "2"]}]}]], " ", "t"}], "+", 
          RowBox[{"ArcTanh", "[", 
           FractionBox[
            RowBox[{
             RowBox[{"cEo", " ", "ka"}], "+", 
             RowBox[{"cAo", " ", 
              RowBox[{"(", 
               RowBox[{"ka", "+", "kd"}], ")"}]}]}], 
            SqrtBox[
             RowBox[{
              RowBox[{
               SuperscriptBox["cEo", "2"], " ", 
               SuperscriptBox["ka", "2"]}], "+", 
              RowBox[{"2", " ", "cAo", " ", "cEo", " ", "ka", " ", 
               RowBox[{"(", 
                RowBox[{
                 RowBox[{"-", "ka"}], "+", "kd"}], ")"}]}], "+", 
              RowBox[{
               SuperscriptBox["cAo", "2"], " ", 
               SuperscriptBox[
                RowBox[{"(", 
                 RowBox[{"ka", "+", "kd"}], ")"}], "2"]}]}]]], "]"}]}], 
         "]"}]}]}], ")"}]}]}], "}"}], "}"}]], "Output",
 CellChangeTimes->{3.875361268929611*^9, 3.8753613684843082`*^9, 
  3.8753614078387437`*^9, 3.8753616521343646`*^9, 3.875361698360881*^9, 
  3.8753633776951995`*^9},
 CellLabel->
  "Out[116]=",ExpressionUUID->"0811fb60-b152-4c33-a75c-d7296996a517"]
}, Open  ]],

Cell[CellGroupData[{

Cell[BoxData[
 RowBox[{"cAn2", "=", 
  RowBox[{"Simplify", "[", 
   RowBox[{
    RowBox[{
     RowBox[{
      RowBox[{"cA", "[", "t", "]"}], "\[Equal]", 
      RowBox[{"cAo", "+", 
       FractionBox[
        RowBox[{
         RowBox[{"(", 
          RowBox[{"ka", "-", "kd"}], ")"}], " ", 
         RowBox[{"(", 
          RowBox[{
           RowBox[{"-", "cEo"}], "+", 
           RowBox[{"cE", "[", "t", "]"}]}], ")"}]}], 
        RowBox[{"ka", "+", "kd"}]], "+", 
       FractionBox[
        RowBox[{
         RowBox[{
          RowBox[{"-", "2"}], " ", "cEo", " ", "ka", " ", "kd", " ", 
          RowBox[{"Log", "[", 
           RowBox[{"cEo", " ", "ka"}], "]"}]}], "+", 
         RowBox[{"2", " ", "cEo", " ", "ka", " ", "kd", " ", 
          RowBox[{"Log", "[", 
           RowBox[{
            RowBox[{
             RowBox[{"-", "cEo"}], " ", "kd"}], "+", 
            RowBox[{
             RowBox[{"(", 
              RowBox[{"ka", "+", "kd"}], ")"}], " ", 
             RowBox[{"cE", "[", "t", "]"}]}]}], "]"}]}]}], 
        SuperscriptBox[
         RowBox[{"(", 
          RowBox[{"ka", "+", "kd"}], ")"}], "2"]]}]}], "/.", 
     RowBox[{
      RowBox[{"cE", "[", "t", "]"}], "\[Rule]", 
      RowBox[{
       FractionBox["1", 
        RowBox[{"2", " ", "ka"}]], 
       RowBox[{"(", 
        RowBox[{
         RowBox[{"cEo", " ", "ka"}], "-", 
         RowBox[{"cAo", " ", 
          RowBox[{"(", 
           RowBox[{"ka", "+", "kd"}], ")"}]}], "+", 
         RowBox[{
          SqrtBox[
           RowBox[{
            RowBox[{
             SuperscriptBox["cEo", "2"], " ", 
             SuperscriptBox["ka", "2"]}], "+", 
            RowBox[{"2", " ", "cAo", " ", "cEo", " ", "ka", " ", 
             RowBox[{"(", 
              RowBox[{
               RowBox[{"-", "ka"}], "+", "kd"}], ")"}]}], "+", 
            RowBox[{
             SuperscriptBox["cAo", "2"], " ", 
             SuperscriptBox[
              RowBox[{"(", 
               RowBox[{"ka", "+", "kd"}], ")"}], "2"]}]}]], " ", 
          RowBox[{"Tanh", "[", 
           RowBox[{
            RowBox[{
             FractionBox["1", "2"], " ", 
             SqrtBox[
              RowBox[{
               RowBox[{
                SuperscriptBox["cEo", "2"], " ", 
                SuperscriptBox["ka", "2"]}], "+", 
               RowBox[{"2", " ", "cAo", " ", "cEo", " ", "ka", " ", 
                RowBox[{"(", 
                 RowBox[{
                  RowBox[{"-", "ka"}], "+", "kd"}], ")"}]}], "+", 
               RowBox[{
                SuperscriptBox["cAo", "2"], " ", 
                SuperscriptBox[
                 RowBox[{"(", 
                  RowBox[{"ka", "+", "kd"}], ")"}], "2"]}]}]], " ", "t"}], 
            "+", 
            RowBox[{"ArcTanh", "[", 
             FractionBox[
              RowBox[{
               RowBox[{"cEo", " ", "ka"}], "+", 
               RowBox[{"cAo", " ", 
                RowBox[{"(", 
                 RowBox[{"ka", "+", "kd"}], ")"}]}]}], 
              SqrtBox[
               RowBox[{
                RowBox[{
                 SuperscriptBox["cEo", "2"], " ", 
                 SuperscriptBox["ka", "2"]}], "+", 
                RowBox[{"2", " ", "cAo", " ", "cEo", " ", "ka", " ", 
                 RowBox[{"(", 
                  RowBox[{
                   RowBox[{"-", "ka"}], "+", "kd"}], ")"}]}], "+", 
                RowBox[{
                 SuperscriptBox["cAo", "2"], " ", 
                 SuperscriptBox[
                  RowBox[{"(", 
                   RowBox[{"ka", "+", "kd"}], ")"}], "2"]}]}]]], "]"}]}], 
           "]"}]}]}], ")"}]}]}]}], ",", 
    RowBox[{
     RowBox[{"ka", ">", "0"}], "&&", 
     RowBox[{"kd", ">", "0"}], "&&", 
     RowBox[{"cAo", ">", "0"}], "&&", 
     RowBox[{"cEo", ">", "0"}]}]}], "]"}]}]], "Input",
 CellChangeTimes->{
  3.875362628441781*^9, {3.8753633860490384`*^9, 3.8753633925702047`*^9}, {
   3.87536481674119*^9, 3.875364844236515*^9}},
 CellLabel->
  "In[136]:=",ExpressionUUID->"d29f3b91-4570-4bbb-b671-24d7f4432272"],

Cell[BoxData[
 RowBox[{
  RowBox[{"cA", "[", "t", "]"}], "\[Equal]", 
  RowBox[{"cAo", "+", 
   RowBox[{
    FractionBox["1", 
     SuperscriptBox[
      RowBox[{"(", 
       RowBox[{"ka", "+", "kd"}], ")"}], "2"]], 
    RowBox[{"2", " ", "cEo", " ", "ka", " ", "kd", " ", 
     RowBox[{"(", 
      RowBox[{
       RowBox[{"-", 
        RowBox[{"Log", "[", 
         RowBox[{"cEo", " ", "ka"}], "]"}]}], "+", 
       RowBox[{"Log", "[", 
        RowBox[{
         RowBox[{
          RowBox[{"-", "cEo"}], " ", "kd"}], "+", 
         RowBox[{
          FractionBox["1", 
           RowBox[{"2", " ", "ka"}]], 
          RowBox[{
           RowBox[{"(", 
            RowBox[{"ka", "+", "kd"}], ")"}], " ", 
           RowBox[{"(", 
            RowBox[{
             RowBox[{"cEo", " ", "ka"}], "-", 
             RowBox[{"cAo", " ", 
              RowBox[{"(", 
               RowBox[{"ka", "+", "kd"}], ")"}]}], "+", 
             RowBox[{
              SqrtBox[
               RowBox[{
                RowBox[{
                 SuperscriptBox["cEo", "2"], " ", 
                 SuperscriptBox["ka", "2"]}], "+", 
                RowBox[{"2", " ", "cAo", " ", "cEo", " ", "ka", " ", 
                 RowBox[{"(", 
                  RowBox[{
                   RowBox[{"-", "ka"}], "+", "kd"}], ")"}]}], "+", 
                RowBox[{
                 SuperscriptBox["cAo", "2"], " ", 
                 SuperscriptBox[
                  RowBox[{"(", 
                   RowBox[{"ka", "+", "kd"}], ")"}], "2"]}]}]], " ", 
              RowBox[{"Tanh", "[", 
               RowBox[{
                RowBox[{
                 FractionBox["1", "2"], " ", 
                 SqrtBox[
                  RowBox[{
                   RowBox[{
                    SuperscriptBox["cEo", "2"], " ", 
                    SuperscriptBox["ka", "2"]}], "+", 
                   RowBox[{"2", " ", "cAo", " ", "cEo", " ", "ka", " ", 
                    RowBox[{"(", 
                    RowBox[{
                    RowBox[{"-", "ka"}], "+", "kd"}], ")"}]}], "+", 
                   RowBox[{
                    SuperscriptBox["cAo", "2"], " ", 
                    SuperscriptBox[
                    RowBox[{"(", 
                    RowBox[{"ka", "+", "kd"}], ")"}], "2"]}]}]], " ", "t"}], 
                "+", 
                RowBox[{"ArcTanh", "[", 
                 FractionBox[
                  RowBox[{
                   RowBox[{"cEo", " ", "ka"}], "+", 
                   RowBox[{"cAo", " ", 
                    RowBox[{"(", 
                    RowBox[{"ka", "+", "kd"}], ")"}]}]}], 
                  SqrtBox[
                   RowBox[{
                    RowBox[{
                    SuperscriptBox["cEo", "2"], " ", 
                    SuperscriptBox["ka", "2"]}], "+", 
                    RowBox[{"2", " ", "cAo", " ", "cEo", " ", "ka", " ", 
                    RowBox[{"(", 
                    RowBox[{
                    RowBox[{"-", "ka"}], "+", "kd"}], ")"}]}], "+", 
                    RowBox[{
                    SuperscriptBox["cAo", "2"], " ", 
                    SuperscriptBox[
                    RowBox[{"(", 
                    RowBox[{"ka", "+", "kd"}], ")"}], "2"]}]}]]], "]"}]}], 
               "]"}]}]}], ")"}]}]}]}], "]"}]}], ")"}]}]}], "-", 
   RowBox[{
    FractionBox["1", 
     RowBox[{"2", " ", "ka", " ", 
      RowBox[{"(", 
       RowBox[{"ka", "+", "kd"}], ")"}]}]], 
    RowBox[{
     RowBox[{"(", 
      RowBox[{"ka", "-", "kd"}], ")"}], " ", 
     RowBox[{"(", 
      RowBox[{
       RowBox[{"cEo", " ", "ka"}], "+", 
       RowBox[{"cAo", " ", 
        RowBox[{"(", 
         RowBox[{"ka", "+", "kd"}], ")"}]}], "-", 
       RowBox[{
        SqrtBox[
         RowBox[{
          RowBox[{
           SuperscriptBox["cEo", "2"], " ", 
           SuperscriptBox["ka", "2"]}], "+", 
          RowBox[{"2", " ", "cAo", " ", "cEo", " ", "ka", " ", 
           RowBox[{"(", 
            RowBox[{
             RowBox[{"-", "ka"}], "+", "kd"}], ")"}]}], "+", 
          RowBox[{
           SuperscriptBox["cAo", "2"], " ", 
           SuperscriptBox[
            RowBox[{"(", 
             RowBox[{"ka", "+", "kd"}], ")"}], "2"]}]}]], " ", 
        RowBox[{"Tanh", "[", 
         RowBox[{
          RowBox[{
           FractionBox["1", "2"], " ", 
           SqrtBox[
            RowBox[{
             RowBox[{
              SuperscriptBox["cEo", "2"], " ", 
              SuperscriptBox["ka", "2"]}], "+", 
             RowBox[{"2", " ", "cAo", " ", "cEo", " ", "ka", " ", 
              RowBox[{"(", 
               RowBox[{
                RowBox[{"-", "ka"}], "+", "kd"}], ")"}]}], "+", 
             RowBox[{
              SuperscriptBox["cAo", "2"], " ", 
              SuperscriptBox[
               RowBox[{"(", 
                RowBox[{"ka", "+", "kd"}], ")"}], "2"]}]}]], " ", "t"}], "+", 
          RowBox[{"ArcTanh", "[", 
           FractionBox[
            RowBox[{
             RowBox[{"cEo", " ", "ka"}], "+", 
             RowBox[{"cAo", " ", 
              RowBox[{"(", 
               RowBox[{"ka", "+", "kd"}], ")"}]}]}], 
            SqrtBox[
             RowBox[{
              RowBox[{
               SuperscriptBox["cEo", "2"], " ", 
               SuperscriptBox["ka", "2"]}], "+", 
              RowBox[{"2", " ", "cAo", " ", "cEo", " ", "ka", " ", 
               RowBox[{"(", 
                RowBox[{
                 RowBox[{"-", "ka"}], "+", "kd"}], ")"}]}], "+", 
              RowBox[{
               SuperscriptBox["cAo", "2"], " ", 
               SuperscriptBox[
                RowBox[{"(", 
                 RowBox[{"ka", "+", "kd"}], ")"}], "2"]}]}]]], "]"}]}], 
         "]"}]}]}], ")"}]}]}]}]}]], "Output",
 CellChangeTimes->{3.8753626422070384`*^9, 3.8753633969689655`*^9, 
  3.875364847442046*^9},
 CellLabel->
  "Out[136]=",ExpressionUUID->"7619c430-30e5-417e-a464-7f901c7484c1"]
}, Open  ]],

Cell[CellGroupData[{

Cell[BoxData[
 RowBox[{"cEn1D", "=", 
  RowBox[{"D", "[", 
   RowBox[{
    RowBox[{
     RowBox[{"cE", "[", "t", "]"}], "\[Equal]", 
     FractionBox[
      RowBox[{"cEo", " ", 
       RowBox[{"(", 
        RowBox[{
         RowBox[{"cEo", " ", "ka"}], "+", 
         RowBox[{"cAo", " ", 
          RowBox[{"(", 
           RowBox[{
            RowBox[{
             SuperscriptBox["\[ExponentialE]", 
              RowBox[{"-", 
               RowBox[{"(", 
                RowBox[{
                 RowBox[{"(", 
                  RowBox[{
                   RowBox[{"cEo", " ", "ka"}], "+", 
                   RowBox[{"cAo", " ", 
                    RowBox[{"(", 
                    RowBox[{"ka", "+", "kd"}], ")"}]}]}], ")"}], " ", "t"}], 
                ")"}]}]], " ", "ka"}], "+", "kd"}], ")"}]}]}], ")"}]}], 
      RowBox[{
       RowBox[{"cEo", " ", "ka"}], "+", 
       RowBox[{"cAo", " ", 
        RowBox[{"(", 
         RowBox[{"ka", "+", "kd"}], ")"}]}]}]]}], ",", "t"}], 
   "]"}]}]], "Input",
 CellChangeTimes->{{3.8753634354075527`*^9, 3.8753634732412996`*^9}, 
   3.8753649989203496`*^9},
 CellLabel->
  "In[138]:=",ExpressionUUID->"3b3f5cbd-c709-4327-95a8-5ab8405e4350"],

Cell[BoxData[
 RowBox[{
  RowBox[{
   SuperscriptBox["cE", "\[Prime]",
    MultilineFunction->None], "[", "t", "]"}], "\[Equal]", 
  FractionBox[
   RowBox[{"cAo", " ", "cEo", " ", 
    SuperscriptBox["\[ExponentialE]", 
     RowBox[{"-", 
      RowBox[{"(", 
       RowBox[{
        RowBox[{"(", 
         RowBox[{
          RowBox[{"cEo", " ", "ka"}], "+", 
          RowBox[{"cAo", " ", 
           RowBox[{"(", 
            RowBox[{"ka", "+", "kd"}], ")"}]}]}], ")"}], " ", "t"}], ")"}]}]],
     " ", "ka", " ", 
    RowBox[{"(", 
     RowBox[{
      RowBox[{
       RowBox[{"-", "cEo"}], " ", "ka"}], "-", 
      RowBox[{"cAo", " ", 
       RowBox[{"(", 
        RowBox[{"ka", "+", "kd"}], ")"}]}]}], ")"}]}], 
   RowBox[{
    RowBox[{"cEo", " ", "ka"}], "+", 
    RowBox[{"cAo", " ", 
     RowBox[{"(", 
      RowBox[{"ka", "+", "kd"}], ")"}]}]}]]}]], "Output",
 CellChangeTimes->{3.8753634502302876`*^9, 3.8753650018211*^9},
 CellLabel->
  "Out[138]=",ExpressionUUID->"6aee3e16-44c0-4e5b-ad3a-c8d1e0eeb482"]
}, Open  ]],

Cell[CellGroupData[{

Cell[BoxData[
 RowBox[{"cAn1D", "=", 
  RowBox[{"D", "[", 
   RowBox[{
    RowBox[{
     RowBox[{"cA", "[", "t", "]"}], "\[Equal]", 
     RowBox[{"cAo", "+", 
      FractionBox[
       RowBox[{"cEo", " ", 
        RowBox[{"(", 
         RowBox[{"ka", "-", "kd"}], ")"}], " ", 
        RowBox[{"(", 
         RowBox[{
          RowBox[{"-", "1"}], "+", 
          FractionBox[
           RowBox[{
            RowBox[{"cEo", " ", "ka"}], "+", 
            RowBox[{"cAo", " ", 
             RowBox[{"(", 
              RowBox[{
               RowBox[{
                SuperscriptBox["\[ExponentialE]", 
                 RowBox[{"-", 
                  RowBox[{"(", 
                   RowBox[{
                    RowBox[{"(", 
                    RowBox[{
                    RowBox[{"cEo", " ", "ka"}], "+", 
                    RowBox[{"cAo", " ", 
                    RowBox[{"(", 
                    RowBox[{"ka", "+", "kd"}], ")"}]}]}], ")"}], " ", "t"}], 
                   ")"}]}]], " ", "ka"}], "+", "kd"}], ")"}]}]}], 
           RowBox[{
            RowBox[{"cEo", " ", "ka"}], "+", 
            RowBox[{"cAo", " ", 
             RowBox[{"(", 
              RowBox[{"ka", "+", "kd"}], ")"}]}]}]]}], ")"}]}], 
       RowBox[{"ka", "+", "kd"}]], "+", 
      FractionBox[
       RowBox[{"2", " ", "cEo", " ", "ka", " ", "kd", " ", 
        RowBox[{"Log", "[", 
         FractionBox[
          RowBox[{
           RowBox[{"cEo", " ", "ka"}], "+", 
           RowBox[{"cAo", " ", 
            SuperscriptBox["\[ExponentialE]", 
             RowBox[{"-", 
              RowBox[{"(", 
               RowBox[{
                RowBox[{"(", 
                 RowBox[{
                  RowBox[{"cEo", " ", "ka"}], "+", 
                  RowBox[{"cAo", " ", 
                   RowBox[{"(", 
                    RowBox[{"ka", "+", "kd"}], ")"}]}]}], ")"}], " ", "t"}], 
               ")"}]}]], " ", 
            RowBox[{"(", 
             RowBox[{"ka", "+", "kd"}], ")"}]}]}], 
          RowBox[{
           RowBox[{"cEo", " ", "ka"}], "+", 
           RowBox[{"cAo", " ", 
            RowBox[{"(", 
             RowBox[{"ka", "+", "kd"}], ")"}]}]}]], "]"}]}], 
       SuperscriptBox[
        RowBox[{"(", 
         RowBox[{"ka", "+", "kd"}], ")"}], "2"]]}]}], ",", "t"}], 
   "]"}]}]], "Input",
 CellChangeTimes->{{3.875363494910123*^9, 3.8753635407301297`*^9}, 
   3.8753650252124205`*^9},
 CellLabel->
  "In[139]:=",ExpressionUUID->"6007af9e-a0ef-4895-a4b8-194b194a20f3"],

Cell[BoxData[
 RowBox[{
  RowBox[{
   SuperscriptBox["cA", "\[Prime]",
    MultilineFunction->None], "[", "t", "]"}], "\[Equal]", 
  RowBox[{
   FractionBox[
    RowBox[{"cAo", " ", "cEo", " ", 
     SuperscriptBox["\[ExponentialE]", 
      RowBox[{"-", 
       RowBox[{"(", 
        RowBox[{
         RowBox[{"(", 
          RowBox[{
           RowBox[{"cEo", " ", "ka"}], "+", 
           RowBox[{"cAo", " ", 
            RowBox[{"(", 
             RowBox[{"ka", "+", "kd"}], ")"}]}]}], ")"}], " ", "t"}], 
        ")"}]}]], " ", "ka", " ", 
     RowBox[{"(", 
      RowBox[{"ka", "-", "kd"}], ")"}], " ", 
     RowBox[{"(", 
      RowBox[{
       RowBox[{
        RowBox[{"-", "cEo"}], " ", "ka"}], "-", 
       RowBox[{"cAo", " ", 
        RowBox[{"(", 
         RowBox[{"ka", "+", "kd"}], ")"}]}]}], ")"}]}], 
    RowBox[{
     RowBox[{"(", 
      RowBox[{"ka", "+", "kd"}], ")"}], " ", 
     RowBox[{"(", 
      RowBox[{
       RowBox[{"cEo", " ", "ka"}], "+", 
       RowBox[{"cAo", " ", 
        RowBox[{"(", 
         RowBox[{"ka", "+", "kd"}], ")"}]}]}], ")"}]}]], "+", 
   FractionBox[
    RowBox[{"2", " ", "cAo", " ", "cEo", " ", 
     SuperscriptBox["\[ExponentialE]", 
      RowBox[{"-", 
       RowBox[{"(", 
        RowBox[{
         RowBox[{"(", 
          RowBox[{
           RowBox[{"cEo", " ", "ka"}], "+", 
           RowBox[{"cAo", " ", 
            RowBox[{"(", 
             RowBox[{"ka", "+", "kd"}], ")"}]}]}], ")"}], " ", "t"}], 
        ")"}]}]], " ", "ka", " ", "kd", " ", 
     RowBox[{"(", 
      RowBox[{
       RowBox[{
        RowBox[{"-", "cEo"}], " ", "ka"}], "-", 
       RowBox[{"cAo", " ", 
        RowBox[{"(", 
         RowBox[{"ka", "+", "kd"}], ")"}]}]}], ")"}]}], 
    RowBox[{
     RowBox[{"(", 
      RowBox[{"ka", "+", "kd"}], ")"}], " ", 
     RowBox[{"(", 
      RowBox[{
       RowBox[{"cEo", " ", "ka"}], "+", 
       RowBox[{"cAo", " ", 
        SuperscriptBox["\[ExponentialE]", 
         RowBox[{"-", 
          RowBox[{"(", 
           RowBox[{
            RowBox[{"(", 
             RowBox[{
              RowBox[{"cEo", " ", "ka"}], "+", 
              RowBox[{"cAo", " ", 
               RowBox[{"(", 
                RowBox[{"ka", "+", "kd"}], ")"}]}]}], ")"}], " ", "t"}], 
           ")"}]}]], " ", 
        RowBox[{"(", 
         RowBox[{"ka", "+", "kd"}], ")"}]}]}], ")"}]}]]}]}]], "Output",
 CellChangeTimes->{{3.875363511017614*^9, 3.8753635313388224`*^9}, 
   3.875363568349595*^9, 3.875365027904147*^9},
 CellLabel->
  "Out[139]=",ExpressionUUID->"a8167776-4521-4e0a-83d9-fff9739f3ff1"]
}, Open  ]],

Cell[CellGroupData[{

Cell[BoxData[
 RowBox[{"cEn2D", "=", 
  RowBox[{"D", "[", 
   RowBox[{
    RowBox[{
     RowBox[{"cE", "[", "t", "]"}], "==", 
     RowBox[{
      FractionBox["1", 
       RowBox[{"2", " ", "ka"}]], 
      RowBox[{"(", 
       RowBox[{
        RowBox[{"cEo", " ", "ka"}], "-", 
        RowBox[{"cAo", " ", 
         RowBox[{"(", 
          RowBox[{"ka", "+", "kd"}], ")"}]}], "+", 
        RowBox[{
         SqrtBox[
          RowBox[{
           RowBox[{
            SuperscriptBox["cEo", "2"], " ", 
            SuperscriptBox["ka", "2"]}], "+", 
           RowBox[{"2", " ", "cAo", " ", "cEo", " ", "ka", " ", 
            RowBox[{"(", 
             RowBox[{
              RowBox[{"-", "ka"}], "+", "kd"}], ")"}]}], "+", 
           RowBox[{
            SuperscriptBox["cAo", "2"], " ", 
            SuperscriptBox[
             RowBox[{"(", 
              RowBox[{"ka", "+", "kd"}], ")"}], "2"]}]}]], " ", 
         RowBox[{"Tanh", "[", 
          RowBox[{
           RowBox[{
            FractionBox["1", "2"], " ", 
            SqrtBox[
             RowBox[{
              RowBox[{
               SuperscriptBox["cEo", "2"], " ", 
               SuperscriptBox["ka", "2"]}], "+", 
              RowBox[{"2", " ", "cAo", " ", "cEo", " ", "ka", " ", 
               RowBox[{"(", 
                RowBox[{
                 RowBox[{"-", "ka"}], "+", "kd"}], ")"}]}], "+", 
              RowBox[{
               SuperscriptBox["cAo", "2"], " ", 
               SuperscriptBox[
                RowBox[{"(", 
                 RowBox[{"ka", "+", "kd"}], ")"}], "2"]}]}]], " ", "t"}], "+", 
           RowBox[{"ArcTanh", "[", 
            FractionBox[
             RowBox[{
              RowBox[{"cEo", " ", "ka"}], "+", 
              RowBox[{"cAo", " ", 
               RowBox[{"(", 
                RowBox[{"ka", "+", "kd"}], ")"}]}]}], 
             SqrtBox[
              RowBox[{
               RowBox[{
                SuperscriptBox["cEo", "2"], " ", 
                SuperscriptBox["ka", "2"]}], "+", 
               RowBox[{"2", " ", "cAo", " ", "cEo", " ", "ka", " ", 
                RowBox[{"(", 
                 RowBox[{
                  RowBox[{"-", "ka"}], "+", "kd"}], ")"}]}], "+", 
               RowBox[{
                SuperscriptBox["cAo", "2"], " ", 
                SuperscriptBox[
                 RowBox[{"(", 
                  RowBox[{"ka", "+", "kd"}], ")"}], "2"]}]}]]], "]"}]}], 
          "]"}]}]}], ")"}]}]}], ",", "t"}], "]"}]}]], "Input",
 CellChangeTimes->{{3.8753635903725915`*^9, 3.8753636150311017`*^9}, 
   3.875363687852473*^9, 3.8753650747973433`*^9},
 CellLabel->
  "In[140]:=",ExpressionUUID->"914ab13f-ac54-4215-90e8-9d87cedd9089"],

Cell[BoxData[
 RowBox[{
  RowBox[{
   SuperscriptBox["cE", "\[Prime]",
    MultilineFunction->None], "[", "t", "]"}], "\[Equal]", 
  RowBox[{
   FractionBox["1", 
    RowBox[{"4", " ", "ka"}]], 
   RowBox[{
    RowBox[{"(", 
     RowBox[{
      RowBox[{
       SuperscriptBox["cEo", "2"], " ", 
       SuperscriptBox["ka", "2"]}], "+", 
      RowBox[{"2", " ", "cAo", " ", "cEo", " ", "ka", " ", 
       RowBox[{"(", 
        RowBox[{
         RowBox[{"-", "ka"}], "+", "kd"}], ")"}]}], "+", 
      RowBox[{
       SuperscriptBox["cAo", "2"], " ", 
       SuperscriptBox[
        RowBox[{"(", 
         RowBox[{"ka", "+", "kd"}], ")"}], "2"]}]}], ")"}], " ", 
    SuperscriptBox[
     RowBox[{"Sech", "[", 
      RowBox[{
       RowBox[{
        FractionBox["1", "2"], " ", 
        SqrtBox[
         RowBox[{
          RowBox[{
           SuperscriptBox["cEo", "2"], " ", 
           SuperscriptBox["ka", "2"]}], "+", 
          RowBox[{"2", " ", "cAo", " ", "cEo", " ", "ka", " ", 
           RowBox[{"(", 
            RowBox[{
             RowBox[{"-", "ka"}], "+", "kd"}], ")"}]}], "+", 
          RowBox[{
           SuperscriptBox["cAo", "2"], " ", 
           SuperscriptBox[
            RowBox[{"(", 
             RowBox[{"ka", "+", "kd"}], ")"}], "2"]}]}]], " ", "t"}], "+", 
       RowBox[{"ArcTanh", "[", 
        FractionBox[
         RowBox[{
          RowBox[{"cEo", " ", "ka"}], "+", 
          RowBox[{"cAo", " ", 
           RowBox[{"(", 
            RowBox[{"ka", "+", "kd"}], ")"}]}]}], 
         SqrtBox[
          RowBox[{
           RowBox[{
            SuperscriptBox["cEo", "2"], " ", 
            SuperscriptBox["ka", "2"]}], "+", 
           RowBox[{"2", " ", "cAo", " ", "cEo", " ", "ka", " ", 
            RowBox[{"(", 
             RowBox[{
              RowBox[{"-", "ka"}], "+", "kd"}], ")"}]}], "+", 
           RowBox[{
            SuperscriptBox["cAo", "2"], " ", 
            SuperscriptBox[
             RowBox[{"(", 
              RowBox[{"ka", "+", "kd"}], ")"}], "2"]}]}]]], "]"}]}], "]"}], 
     "2"]}]}]}]], "Output",
 CellChangeTimes->{3.8753636174231405`*^9, 3.8753650775952067`*^9},
 CellLabel->
  "Out[140]=",ExpressionUUID->"b4ebd868-06df-421e-881b-8daccf0aeb25"]
}, Open  ]],

Cell[CellGroupData[{

Cell[BoxData[
 RowBox[{"cAn2D", "=", 
  RowBox[{"D", "[", 
   RowBox[{
    RowBox[{
     RowBox[{"cA", "[", "t", "]"}], "\[Equal]", 
     RowBox[{"cAo", "+", 
      RowBox[{
       FractionBox["1", 
        SuperscriptBox[
         RowBox[{"(", 
          RowBox[{"ka", "+", "kd"}], ")"}], "2"]], "2", " ", "cEo", " ", "ka",
        " ", "kd", " ", 
       RowBox[{"(", 
        RowBox[{
         RowBox[{"-", 
          RowBox[{"Log", "[", 
           RowBox[{"cEo", " ", "ka"}], "]"}]}], "+", 
         RowBox[{"Log", "[", 
          RowBox[{
           RowBox[{
            RowBox[{"-", "cEo"}], " ", "kd"}], "+", 
           RowBox[{
            FractionBox["1", 
             RowBox[{"2", " ", "ka"}]], 
            RowBox[{"(", 
             RowBox[{"ka", "+", "kd"}], ")"}], " ", 
            RowBox[{"(", 
             RowBox[{
              RowBox[{"cEo", " ", "ka"}], "-", 
              RowBox[{"cAo", " ", 
               RowBox[{"(", 
                RowBox[{"ka", "+", "kd"}], ")"}]}], "+", 
              RowBox[{
               SqrtBox[
                RowBox[{
                 RowBox[{
                  SuperscriptBox["cEo", "2"], " ", 
                  SuperscriptBox["ka", "2"]}], "+", 
                 RowBox[{"2", " ", "cAo", " ", "cEo", " ", "ka", " ", 
                  RowBox[{"(", 
                   RowBox[{
                    RowBox[{"-", "ka"}], "+", "kd"}], ")"}]}], "+", 
                 RowBox[{
                  SuperscriptBox["cAo", "2"], " ", 
                  SuperscriptBox[
                   RowBox[{"(", 
                    RowBox[{"ka", "+", "kd"}], ")"}], "2"]}]}]], " ", 
               RowBox[{"Tanh", "[", 
                RowBox[{
                 RowBox[{
                  FractionBox["1", "2"], " ", 
                  SqrtBox[
                   RowBox[{
                    RowBox[{
                    SuperscriptBox["cEo", "2"], " ", 
                    SuperscriptBox["ka", "2"]}], "+", 
                    RowBox[{"2", " ", "cAo", " ", "cEo", " ", "ka", " ", 
                    RowBox[{"(", 
                    RowBox[{
                    RowBox[{"-", "ka"}], "+", "kd"}], ")"}]}], "+", 
                    RowBox[{
                    SuperscriptBox["cAo", "2"], " ", 
                    SuperscriptBox[
                    RowBox[{"(", 
                    RowBox[{"ka", "+", "kd"}], ")"}], "2"]}]}]], " ", "t"}], 
                 "+", 
                 RowBox[{"ArcTanh", "[", 
                  FractionBox[
                   RowBox[{
                    RowBox[{"cEo", " ", "ka"}], "+", 
                    RowBox[{"cAo", " ", 
                    RowBox[{"(", 
                    RowBox[{"ka", "+", "kd"}], ")"}]}]}], 
                   SqrtBox[
                    RowBox[{
                    RowBox[{
                    SuperscriptBox["cEo", "2"], " ", 
                    SuperscriptBox["ka", "2"]}], "+", 
                    RowBox[{"2", " ", "cAo", " ", "cEo", " ", "ka", " ", 
                    RowBox[{"(", 
                    RowBox[{
                    RowBox[{"-", "ka"}], "+", "kd"}], ")"}]}], "+", 
                    RowBox[{
                    SuperscriptBox["cAo", "2"], " ", 
                    SuperscriptBox[
                    RowBox[{"(", 
                    RowBox[{"ka", "+", "kd"}], ")"}], "2"]}]}]]], "]"}]}], 
                "]"}]}]}], ")"}]}]}], "]"}]}], ")"}]}], "-", 
      RowBox[{
       FractionBox["1", 
        RowBox[{"2", " ", "ka", " ", 
         RowBox[{"(", 
          RowBox[{"ka", "+", "kd"}], ")"}]}]], 
       RowBox[{"(", 
        RowBox[{"ka", "-", "kd"}], ")"}], " ", 
       RowBox[{"(", 
        RowBox[{
         RowBox[{"cEo", " ", "ka"}], "+", 
         RowBox[{"cAo", " ", 
          RowBox[{"(", 
           RowBox[{"ka", "+", "kd"}], ")"}]}], "-", 
         RowBox[{
          SqrtBox[
           RowBox[{
            RowBox[{
             SuperscriptBox["cEo", "2"], " ", 
             SuperscriptBox["ka", "2"]}], "+", 
            RowBox[{"2", " ", "cAo", " ", "cEo", " ", "ka", " ", 
             RowBox[{"(", 
              RowBox[{
               RowBox[{"-", "ka"}], "+", "kd"}], ")"}]}], "+", 
            RowBox[{
             SuperscriptBox["cAo", "2"], " ", 
             SuperscriptBox[
              RowBox[{"(", 
               RowBox[{"ka", "+", "kd"}], ")"}], "2"]}]}]], " ", 
          RowBox[{"Tanh", "[", 
           RowBox[{
            RowBox[{
             FractionBox["1", "2"], " ", 
             SqrtBox[
              RowBox[{
               RowBox[{
                SuperscriptBox["cEo", "2"], " ", 
                SuperscriptBox["ka", "2"]}], "+", 
               RowBox[{"2", " ", "cAo", " ", "cEo", " ", "ka", " ", 
                RowBox[{"(", 
                 RowBox[{
                  RowBox[{"-", "ka"}], "+", "kd"}], ")"}]}], "+", 
               RowBox[{
                SuperscriptBox["cAo", "2"], " ", 
                SuperscriptBox[
                 RowBox[{"(", 
                  RowBox[{"ka", "+", "kd"}], ")"}], "2"]}]}]], " ", "t"}], 
            "+", 
            RowBox[{"ArcTanh", "[", 
             FractionBox[
              RowBox[{
               RowBox[{"cEo", " ", "ka"}], "+", 
               RowBox[{"cAo", " ", 
                RowBox[{"(", 
                 RowBox[{"ka", "+", "kd"}], ")"}]}]}], 
              SqrtBox[
               RowBox[{
                RowBox[{
                 SuperscriptBox["cEo", "2"], " ", 
                 SuperscriptBox["ka", "2"]}], "+", 
                RowBox[{"2", " ", "cAo", " ", "cEo", " ", "ka", " ", 
                 RowBox[{"(", 
                  RowBox[{
                   RowBox[{"-", "ka"}], "+", "kd"}], ")"}]}], "+", 
                RowBox[{
                 SuperscriptBox["cAo", "2"], " ", 
                 SuperscriptBox[
                  RowBox[{"(", 
                   RowBox[{"ka", "+", "kd"}], ")"}], "2"]}]}]]], "]"}]}], 
           "]"}]}]}], ")"}]}]}]}], ",", "t"}], "]"}]}]], "Input",
 CellChangeTimes->{{3.875363626596534*^9, 3.8753636340464845`*^9}, {
   3.8753636922306786`*^9, 3.8753637115176735`*^9}, {3.8753640441992373`*^9, 
   3.875364109273923*^9}, 3.8753651088893604`*^9},
 CellLabel->
  "In[141]:=",ExpressionUUID->"9b55c00f-7a80-48d4-bd90-367335b76a0c"],

Cell[BoxData[
 RowBox[{
  RowBox[{
   SuperscriptBox["cA", "\[Prime]",
    MultilineFunction->None], "[", "t", "]"}], "\[Equal]", 
  RowBox[{
   RowBox[{
    FractionBox["1", 
     RowBox[{"4", " ", "ka", " ", 
      RowBox[{"(", 
       RowBox[{"ka", "+", "kd"}], ")"}]}]], 
    RowBox[{
     RowBox[{"(", 
      RowBox[{"ka", "-", "kd"}], ")"}], " ", 
     RowBox[{"(", 
      RowBox[{
       RowBox[{
        SuperscriptBox["cEo", "2"], " ", 
        SuperscriptBox["ka", "2"]}], "+", 
       RowBox[{"2", " ", "cAo", " ", "cEo", " ", "ka", " ", 
        RowBox[{"(", 
         RowBox[{
          RowBox[{"-", "ka"}], "+", "kd"}], ")"}]}], "+", 
       RowBox[{
        SuperscriptBox["cAo", "2"], " ", 
        SuperscriptBox[
         RowBox[{"(", 
          RowBox[{"ka", "+", "kd"}], ")"}], "2"]}]}], ")"}], " ", 
     SuperscriptBox[
      RowBox[{"Sech", "[", 
       RowBox[{
        RowBox[{
         FractionBox["1", "2"], " ", 
         SqrtBox[
          RowBox[{
           RowBox[{
            SuperscriptBox["cEo", "2"], " ", 
            SuperscriptBox["ka", "2"]}], "+", 
           RowBox[{"2", " ", "cAo", " ", "cEo", " ", "ka", " ", 
            RowBox[{"(", 
             RowBox[{
              RowBox[{"-", "ka"}], "+", "kd"}], ")"}]}], "+", 
           RowBox[{
            SuperscriptBox["cAo", "2"], " ", 
            SuperscriptBox[
             RowBox[{"(", 
              RowBox[{"ka", "+", "kd"}], ")"}], "2"]}]}]], " ", "t"}], "+", 
        RowBox[{"ArcTanh", "[", 
         FractionBox[
          RowBox[{
           RowBox[{"cEo", " ", "ka"}], "+", 
           RowBox[{"cAo", " ", 
            RowBox[{"(", 
             RowBox[{"ka", "+", "kd"}], ")"}]}]}], 
          SqrtBox[
           RowBox[{
            RowBox[{
             SuperscriptBox["cEo", "2"], " ", 
             SuperscriptBox["ka", "2"]}], "+", 
            RowBox[{"2", " ", "cAo", " ", "cEo", " ", "ka", " ", 
             RowBox[{"(", 
              RowBox[{
               RowBox[{"-", "ka"}], "+", "kd"}], ")"}]}], "+", 
            RowBox[{
             SuperscriptBox["cAo", "2"], " ", 
             SuperscriptBox[
              RowBox[{"(", 
               RowBox[{"ka", "+", "kd"}], ")"}], "2"]}]}]]], "]"}]}], "]"}], 
      "2"]}]}], "+", 
   RowBox[{
    RowBox[{"(", 
     RowBox[{"cEo", " ", "kd", " ", 
      RowBox[{"(", 
       RowBox[{
        RowBox[{
         SuperscriptBox["cEo", "2"], " ", 
         SuperscriptBox["ka", "2"]}], "+", 
        RowBox[{"2", " ", "cAo", " ", "cEo", " ", "ka", " ", 
         RowBox[{"(", 
          RowBox[{
           RowBox[{"-", "ka"}], "+", "kd"}], ")"}]}], "+", 
        RowBox[{
         SuperscriptBox["cAo", "2"], " ", 
         SuperscriptBox[
          RowBox[{"(", 
           RowBox[{"ka", "+", "kd"}], ")"}], "2"]}]}], ")"}], " ", 
      SuperscriptBox[
       RowBox[{"Sech", "[", 
        RowBox[{
         RowBox[{
          FractionBox["1", "2"], " ", 
          SqrtBox[
           RowBox[{
            RowBox[{
             SuperscriptBox["cEo", "2"], " ", 
             SuperscriptBox["ka", "2"]}], "+", 
            RowBox[{"2", " ", "cAo", " ", "cEo", " ", "ka", " ", 
             RowBox[{"(", 
              RowBox[{
               RowBox[{"-", "ka"}], "+", "kd"}], ")"}]}], "+", 
            RowBox[{
             SuperscriptBox["cAo", "2"], " ", 
             SuperscriptBox[
              RowBox[{"(", 
               RowBox[{"ka", "+", "kd"}], ")"}], "2"]}]}]], " ", "t"}], "+", 
         RowBox[{"ArcTanh", "[", 
          FractionBox[
           RowBox[{
            RowBox[{"cEo", " ", "ka"}], "+", 
            RowBox[{"cAo", " ", 
             RowBox[{"(", 
              RowBox[{"ka", "+", "kd"}], ")"}]}]}], 
           SqrtBox[
            RowBox[{
             RowBox[{
              SuperscriptBox["cEo", "2"], " ", 
              SuperscriptBox["ka", "2"]}], "+", 
             RowBox[{"2", " ", "cAo", " ", "cEo", " ", "ka", " ", 
              RowBox[{"(", 
               RowBox[{
                RowBox[{"-", "ka"}], "+", "kd"}], ")"}]}], "+", 
             RowBox[{
              SuperscriptBox["cAo", "2"], " ", 
              SuperscriptBox[
               RowBox[{"(", 
                RowBox[{"ka", "+", "kd"}], ")"}], "2"]}]}]]], "]"}]}], "]"}], 
       "2"]}], ")"}], "/", 
    RowBox[{"(", 
     RowBox[{"2", " ", 
      RowBox[{"(", 
       RowBox[{"ka", "+", "kd"}], ")"}], " ", 
      RowBox[{"(", 
       RowBox[{
        RowBox[{
         RowBox[{"-", "cEo"}], " ", "kd"}], "+", 
        RowBox[{
         FractionBox["1", 
          RowBox[{"2", " ", "ka"}]], 
         RowBox[{
          RowBox[{"(", 
           RowBox[{"ka", "+", "kd"}], ")"}], " ", 
          RowBox[{"(", 
           RowBox[{
            RowBox[{"cEo", " ", "ka"}], "-", 
            RowBox[{"cAo", " ", 
             RowBox[{"(", 
              RowBox[{"ka", "+", "kd"}], ")"}]}], "+", 
            RowBox[{
             SqrtBox[
              RowBox[{
               RowBox[{
                SuperscriptBox["cEo", "2"], " ", 
                SuperscriptBox["ka", "2"]}], "+", 
               RowBox[{"2", " ", "cAo", " ", "cEo", " ", "ka", " ", 
                RowBox[{"(", 
                 RowBox[{
                  RowBox[{"-", "ka"}], "+", "kd"}], ")"}]}], "+", 
               RowBox[{
                SuperscriptBox["cAo", "2"], " ", 
                SuperscriptBox[
                 RowBox[{"(", 
                  RowBox[{"ka", "+", "kd"}], ")"}], "2"]}]}]], " ", 
             RowBox[{"Tanh", "[", 
              RowBox[{
               RowBox[{
                FractionBox["1", "2"], " ", 
                SqrtBox[
                 RowBox[{
                  RowBox[{
                   SuperscriptBox["cEo", "2"], " ", 
                   SuperscriptBox["ka", "2"]}], "+", 
                  RowBox[{"2", " ", "cAo", " ", "cEo", " ", "ka", " ", 
                   RowBox[{"(", 
                    RowBox[{
                    RowBox[{"-", "ka"}], "+", "kd"}], ")"}]}], "+", 
                  RowBox[{
                   SuperscriptBox["cAo", "2"], " ", 
                   SuperscriptBox[
                    RowBox[{"(", 
                    RowBox[{"ka", "+", "kd"}], ")"}], "2"]}]}]], " ", "t"}], 
               "+", 
               RowBox[{"ArcTanh", "[", 
                FractionBox[
                 RowBox[{
                  RowBox[{"cEo", " ", "ka"}], "+", 
                  RowBox[{"cAo", " ", 
                   RowBox[{"(", 
                    RowBox[{"ka", "+", "kd"}], ")"}]}]}], 
                 SqrtBox[
                  RowBox[{
                   RowBox[{
                    SuperscriptBox["cEo", "2"], " ", 
                    SuperscriptBox["ka", "2"]}], "+", 
                   RowBox[{"2", " ", "cAo", " ", "cEo", " ", "ka", " ", 
                    RowBox[{"(", 
                    RowBox[{
                    RowBox[{"-", "ka"}], "+", "kd"}], ")"}]}], "+", 
                   RowBox[{
                    SuperscriptBox["cAo", "2"], " ", 
                    SuperscriptBox[
                    RowBox[{"(", 
                    RowBox[{"ka", "+", "kd"}], ")"}], "2"]}]}]]], "]"}]}], 
              "]"}]}]}], ")"}]}]}]}], ")"}]}], ")"}]}]}]}]], "Output",
 CellChangeTimes->{3.8753637129556923`*^9, 3.87536408219559*^9, 
  3.8753641153187647`*^9, 3.875365113813141*^9},
 CellLabel->
  "Out[141]=",ExpressionUUID->"5745c710-d1a2-4f9f-a569-01abedbc7461"]
}, Open  ]],

Cell["2. Steady-state approximation", "Text",
 CellChangeTimes->{{3.8753656050450068`*^9, 3.875365610966113*^9}, {
  3.8765641947622447`*^9, 
  3.876564197911979*^9}},ExpressionUUID->"fe1fa69e-3a37-45cb-b0bc-\
a3302c51868c"],

Cell[CellGroupData[{

Cell[BoxData[{
 RowBox[{
  RowBox[{
   RowBox[{"-", 
    RowBox[{
     RowBox[{"cA", "'"}], "[", "t", "]"}]}], "\[Equal]", 
   RowBox[{
    RowBox[{"ka", "*", 
     RowBox[{"cA", "[", "t", "]"}], "*", 
     RowBox[{"cE", "[", "t", "]"}]}], "+", 
    RowBox[{"kd", "*", 
     RowBox[{"cA", "[", "t", "]"}], "*", 
     RowBox[{"cF", "[", "t", "]"}]}]}]}], "/.", 
  RowBox[{
   RowBox[{"cF", "[", "t", "]"}], "\[Rule]", 
   RowBox[{"cEo", "-", 
    RowBox[{"cE", "[", "t", "]"}]}]}]}], "\[IndentingNewLine]", 
 RowBox[{
  RowBox[{
   RowBox[{"-", 
    RowBox[{
     RowBox[{"cE", "'"}], "[", "t", "]"}]}], "\[Equal]", 
   RowBox[{
    RowBox[{"ka", "*", 
     RowBox[{"cA", "[", "t", "]"}], "*", 
     RowBox[{"cE", "[", "t", "]"}]}], "-", 
    RowBox[{"kd", "*", 
     RowBox[{"cA", "[", "t", "]"}], "*", 
     RowBox[{"cF", "[", "t", "]"}]}]}]}], "/.", 
  RowBox[{
   RowBox[{"cF", "[", "t", "]"}], "\[Rule]", 
   RowBox[{"cEo", "-", 
    RowBox[{"cE", "[", "t", "]"}]}]}]}], "\[IndentingNewLine]", 
 RowBox[{
  RowBox[{"-", 
   RowBox[{
    RowBox[{"cF", "'"}], "[", "t", "]"}]}], "\[Equal]", 
  RowBox[{
   RowBox[{"cE", "'"}], "[", "t", "]"}]}]}], "Input",
 CellLabel->
  "In[146]:=",ExpressionUUID->"b52d70e4-1493-4451-a6af-abb4017e935f"],

Cell[BoxData[
 RowBox[{
  RowBox[{"-", 
   RowBox[{
    SuperscriptBox["cA", "\[Prime]",
     MultilineFunction->None], "[", "t", "]"}]}], "\[Equal]", 
  RowBox[{
   RowBox[{"kd", " ", 
    RowBox[{"cA", "[", "t", "]"}], " ", 
    RowBox[{"(", 
     RowBox[{"cEo", "-", 
      RowBox[{"cE", "[", "t", "]"}]}], ")"}]}], "+", 
   RowBox[{"ka", " ", 
    RowBox[{"cA", "[", "t", "]"}], " ", 
    RowBox[{"cE", "[", "t", "]"}]}]}]}]], "Output",
 CellChangeTimes->{3.8753656995033827`*^9},
 CellLabel->
  "Out[146]=",ExpressionUUID->"6d30f4c5-7ab8-416e-9094-1d1102432fa9"],

Cell[BoxData[
 RowBox[{
  RowBox[{"-", 
   RowBox[{
    SuperscriptBox["cE", "\[Prime]",
     MultilineFunction->None], "[", "t", "]"}]}], "\[Equal]", 
  RowBox[{
   RowBox[{
    RowBox[{"-", "kd"}], " ", 
    RowBox[{"cA", "[", "t", "]"}], " ", 
    RowBox[{"(", 
     RowBox[{"cEo", "-", 
      RowBox[{"cE", "[", "t", "]"}]}], ")"}]}], "+", 
   RowBox[{"ka", " ", 
    RowBox[{"cA", "[", "t", "]"}], " ", 
    RowBox[{"cE", "[", "t", "]"}]}]}]}]], "Output",
 CellChangeTimes->{3.875365699510361*^9},
 CellLabel->
  "Out[147]=",ExpressionUUID->"0fefe88f-5a2d-4428-9269-6021d6f90864"],

Cell[BoxData[
 RowBox[{
  RowBox[{"-", 
   RowBox[{
    SuperscriptBox["cF", "\[Prime]",
     MultilineFunction->None], "[", "t", "]"}]}], "\[Equal]", 
  RowBox[{
   SuperscriptBox["cE", "\[Prime]",
    MultilineFunction->None], "[", "t", "]"}]}]], "Output",
 CellChangeTimes->{3.8753656995153465`*^9},
 CellLabel->
  "Out[148]=",ExpressionUUID->"289dd948-d90c-4d72-99b5-5361f0ec4cd9"]
}, Open  ]],

Cell[CellGroupData[{

Cell[BoxData[
 RowBox[{"Solve", "[", 
  RowBox[{
   RowBox[{
    RowBox[{
     RowBox[{"-", 
      RowBox[{
       SuperscriptBox["cE", "\[Prime]",
        MultilineFunction->None], "[", "t", "]"}]}], "\[Equal]", 
     RowBox[{
      RowBox[{
       RowBox[{"-", "kd"}], " ", 
       RowBox[{"cA", "[", "t", "]"}], " ", 
       RowBox[{"(", 
        RowBox[{"cEo", "-", 
         RowBox[{"cE", "[", "t", "]"}]}], ")"}]}], "+", 
      RowBox[{"ka", " ", 
       RowBox[{"cA", "[", "t", "]"}], " ", 
       RowBox[{"cE", "[", "t", "]"}]}]}]}], "/.", 
    RowBox[{
     RowBox[{
      RowBox[{"cE", "'"}], "[", "t", "]"}], "\[Rule]", "0"}]}], ",", 
   RowBox[{"cE", "[", "t", "]"}]}], "]"}]], "Input",
 CellChangeTimes->{{3.8753657095091057`*^9, 3.8753657502010365`*^9}, {
  3.875366045883342*^9, 3.8753660883268065`*^9}},
 CellLabel->
  "In[158]:=",ExpressionUUID->"22a740ca-3879-4290-aeeb-22a6b6e288b3"],

Cell[BoxData[
 RowBox[{"{", 
  RowBox[{"{", 
   RowBox[{
    RowBox[{"cE", "[", "t", "]"}], "\[Rule]", 
    FractionBox[
     RowBox[{"cEo", " ", "kd"}], 
     RowBox[{"ka", "+", "kd"}]]}], "}"}], "}"}]], "Output",
 CellChangeTimes->{
  3.8753657519449935`*^9, {3.8753660616293125`*^9, 3.875366089833826*^9}},
 CellLabel->
  "Out[158]=",ExpressionUUID->"7dbba73d-5713-4267-ac07-30425365f913"]
}, Open  ]],

Cell[CellGroupData[{

Cell[BoxData[
 RowBox[{"D", "[", 
  RowBox[{
   RowBox[{"DSolve", "[", 
    RowBox[{
     RowBox[{"{", 
      RowBox[{
       RowBox[{
        RowBox[{
         RowBox[{"-", 
          RowBox[{
           SuperscriptBox["cA", "\[Prime]",
            MultilineFunction->None], "[", "t", "]"}]}], "\[Equal]", 
         RowBox[{
          RowBox[{"kd", " ", 
           RowBox[{"cA", "[", "t", "]"}], " ", 
           RowBox[{"(", 
            RowBox[{"cEo", "-", 
             RowBox[{"cE", "[", "t", "]"}]}], ")"}]}], "+", 
          RowBox[{"ka", " ", 
           RowBox[{"cA", "[", "t", "]"}], " ", 
           RowBox[{"cE", "[", "t", "]"}]}]}]}], "/.", 
        RowBox[{
         RowBox[{"cE", "[", "t", "]"}], "\[Rule]", 
         FractionBox[
          RowBox[{"cEo", " ", "kd"}], 
          RowBox[{"ka", "+", "kd"}]]}]}], ",", 
       RowBox[{
        RowBox[{"cA", "[", "0", "]"}], "\[Equal]", "cAo"}]}], "}"}], ",", 
     RowBox[{"cA", "[", "t", "]"}], ",", "t"}], "]"}], ",", "t"}], 
  "]"}]], "Input",
 CellChangeTimes->{{3.8753657603369436`*^9, 3.875365829224991*^9}, {
  3.875365951796008*^9, 3.8753660150408936`*^9}},
 CellLabel->
  "In[156]:=",ExpressionUUID->"c73cac85-d9e9-459e-8237-890d55828a6f"],

Cell[BoxData[
 RowBox[{"{", 
  RowBox[{"{", 
   RowBox[{
    RowBox[{
     SuperscriptBox["cA", "\[Prime]",
      MultilineFunction->None], "[", "t", "]"}], "\[Rule]", 
    RowBox[{"-", 
     FractionBox[
      RowBox[{"2", " ", "cAo", " ", "cEo", " ", 
       SuperscriptBox["\[ExponentialE]", 
        RowBox[{"-", 
         FractionBox[
          RowBox[{"2", " ", "cEo", " ", "ka", " ", "kd", " ", "t"}], 
          RowBox[{"ka", "+", "kd"}]]}]], " ", "ka", " ", "kd"}], 
      RowBox[{"ka", "+", "kd"}]]}]}], "}"}], "}"}]], "Output",
 CellChangeTimes->{
  3.875365833815178*^9, {3.8753659551028547`*^9, 3.875366016620015*^9}},
 CellLabel->
  "Out[156]=",ExpressionUUID->"c3f48685-08a6-412f-a6c0-a01d6609652a"]
}, Open  ]],

Cell[CellGroupData[{

Cell[BoxData[
 RowBox[{
  RowBox[{"Manipulate", "[", 
   RowBox[{
    RowBox[{"Module", "[", 
     RowBox[{
      RowBox[{"{", 
       RowBox[{
       "PingPongModel1", ",", "soln", ",", "eqAns", ",", "eqAn2", ",", 
        "eqAss", ",", "eqEns", ",", "eqEn2", ",", "eqEss", ",", "plot1"}], 
       "}"}], ",", "\[IndentingNewLine]", 
      RowBox[{
       RowBox[{"PingPongModel1", "=", 
        RowBox[{"Sequence", "[", "\[IndentingNewLine]", 
         RowBox[{
          RowBox[{"PlotRange", "\[Rule]", "Full"}], ",", 
          "\[IndentingNewLine]", 
          RowBox[{"PlotLabel", "\[Rule]", 
           RowBox[{"Style", "[", 
            RowBox[{
            "\"\<Ping-Pong Reaction with One Substrate Undergoing \
Disproportionation\nin the Absence of Suicide Substrate Inactivation \
(\!\(\*SubscriptBox[StyleBox[\"k\",FontSlant->\"Italic\"], \"c\"]\) \
\[RightArrow] \[Infinity] and \
\!\(\*SubscriptBox[StyleBox[\"k\",FontSlant->\"Italic\"], \"f\"]\) \
\[RightArrow] \[Infinity]):\nA + E \[LongRightArrow] P + F\nA + F \
\[LongRightArrow] Q + E\>\"", ",", 
             RowBox[{"FontSize", "\[Rule]", "14"}]}], "]"}]}], ",", 
          "\[IndentingNewLine]", 
          RowBox[{"Frame", "\[Rule]", "True"}], ",", "\[IndentingNewLine]", 
          RowBox[{"FrameLabel", "\[Rule]", 
           RowBox[{"{", 
            RowBox[{
            "\"\<Time, s\>\"", ",", 
             "\"\<d[ ]/dt, \!\(\*FormBox[RowBox[{\"mol\", \" \", \
SuperscriptBox[RowBox[{StyleBox[\"m\",FontSlant->\"Plain\"], \" \"}], \
RowBox[{\"\[Dash]\", \"3\"}]], \
SuperscriptBox[StyleBox[\"s\",FontSlant->\"Plain\"], RowBox[{\"\[Dash]\", \"1\
\"}]]}],TraditionalForm]\)\>\""}], "}"}]}], ",", "\[IndentingNewLine]", 
          RowBox[{"LabelStyle", "\[Rule]", 
           RowBox[{"{", 
            RowBox[{"FontSize", "\[Rule]", "14"}], "}"}]}], ",", 
          "\[IndentingNewLine]", 
          RowBox[{"ImageSize", "\[Rule]", 
           RowBox[{"1.2", 
            RowBox[{"{", 
             RowBox[{"480", ",", "310"}], "}"}]}]}]}], "]"}]}], ";", 
       "\[IndentingNewLine]", 
       RowBox[{"soln", "=", 
        RowBox[{"NDSolve", "[", 
         RowBox[{
          RowBox[{"{", 
           RowBox[{
            RowBox[{
             RowBox[{"-", 
              RowBox[{
               RowBox[{"cA", "'"}], "[", "t", "]"}]}], "\[Equal]", 
             RowBox[{
              RowBox[{"ka", "*", 
               RowBox[{"cA", "[", "t", "]"}], "*", 
               RowBox[{"cE", "[", "t", "]"}]}], "+", 
              RowBox[{"kd", "*", 
               RowBox[{"cA", "[", "t", "]"}], "*", 
               RowBox[{"cF", "[", "t", "]"}]}]}]}], ",", 
            RowBox[{
             RowBox[{"-", 
              RowBox[{
               RowBox[{"cE", "'"}], "[", "t", "]"}]}], "\[Equal]", 
             RowBox[{
              RowBox[{"ka", "*", 
               RowBox[{"cA", "[", "t", "]"}], "*", 
               RowBox[{"cE", "[", "t", "]"}]}], "-", 
              RowBox[{"kd", "*", 
               RowBox[{"cA", "[", "t", "]"}], "*", 
               RowBox[{"cF", "[", "t", "]"}]}]}]}], ",", 
            "\[IndentingNewLine]", 
            RowBox[{
             RowBox[{
              RowBox[{"cF", "'"}], "[", "t", "]"}], "\[Equal]", 
             RowBox[{
              RowBox[{"ka", "*", 
               RowBox[{"cA", "[", "t", "]"}], "*", 
               RowBox[{"cE", "[", "t", "]"}]}], "-", 
              RowBox[{"kd", "*", 
               RowBox[{"cA", "[", "t", "]"}], "*", 
               RowBox[{"cF", "[", "t", "]"}]}]}]}], ",", 
            RowBox[{
             RowBox[{
              RowBox[{"cP", "'"}], "[", "t", "]"}], "\[Equal]", 
             RowBox[{"ka", "*", 
              RowBox[{"cA", "[", "t", "]"}], "*", 
              RowBox[{"cE", "[", "t", "]"}]}]}], ",", 
            RowBox[{
             RowBox[{
              RowBox[{"cQ", "'"}], "[", "t", "]"}], "\[Equal]", 
             RowBox[{"kd", "*", 
              RowBox[{"cA", "[", "t", "]"}], "*", 
              RowBox[{"cF", "[", "t", "]"}]}]}], ",", 
            RowBox[{
             RowBox[{"cA", "[", "0", "]"}], "\[Equal]", "cAo"}], ",", 
            RowBox[{
             RowBox[{"cE", "[", "0", "]"}], "\[Equal]", "cEo"}], ",", 
            RowBox[{
             RowBox[{"cF", "[", "0", "]"}], "\[Equal]", "cFo"}], ",", 
            RowBox[{
             RowBox[{"cP", "[", "0", "]"}], "\[Equal]", "cPo"}], ",", 
            RowBox[{
             RowBox[{"cQ", "[", "0", "]"}], "\[Equal]", "cQo"}]}], "}"}], ",", 
          RowBox[{"{", 
           RowBox[{"cA", ",", "cE", ",", "cF", ",", "cP", ",", "cQ"}], "}"}], 
          ",", 
          RowBox[{"{", 
           RowBox[{"t", ",", "0.0", ",", "250"}], "}"}]}], "]"}]}], ";", 
       "\[IndentingNewLine]", 
       RowBox[{"eqAns", "=", 
        RowBox[{
         RowBox[{"-", 
          RowBox[{
           RowBox[{"cA", "'"}], "[", "t", "]"}]}], "/.", "soln"}]}], ";", 
       "\[IndentingNewLine]", 
       RowBox[{"eqAn2", "=", 
        RowBox[{"-", 
         RowBox[{"(", 
          RowBox[{
           RowBox[{
            FractionBox["1", 
             RowBox[{"4", " ", "ka", " ", 
              RowBox[{"(", 
               RowBox[{"ka", "+", "kd"}], ")"}]}]], 
            RowBox[{"(", 
             RowBox[{"ka", "-", "kd"}], ")"}], " ", 
            RowBox[{"(", 
             RowBox[{
              RowBox[{
               SuperscriptBox["cEo", "2"], " ", 
               SuperscriptBox["ka", "2"]}], "+", 
              RowBox[{"2", " ", "cAo", " ", "cEo", " ", "ka", " ", 
               RowBox[{"(", 
                RowBox[{
                 RowBox[{"-", "ka"}], "+", "kd"}], ")"}]}], "+", 
              RowBox[{
               SuperscriptBox["cAo", "2"], " ", 
               SuperscriptBox[
                RowBox[{"(", 
                 RowBox[{"ka", "+", "kd"}], ")"}], "2"]}]}], ")"}], " ", 
            SuperscriptBox[
             RowBox[{"Sech", "[", 
              RowBox[{
               RowBox[{
                FractionBox["1", "2"], " ", 
                SqrtBox[
                 RowBox[{
                  RowBox[{
                   SuperscriptBox["cEo", "2"], " ", 
                   SuperscriptBox["ka", "2"]}], "+", 
                  RowBox[{"2", " ", "cAo", " ", "cEo", " ", "ka", " ", 
                   RowBox[{"(", 
                    RowBox[{
                    RowBox[{"-", "ka"}], "+", "kd"}], ")"}]}], "+", 
                  RowBox[{
                   SuperscriptBox["cAo", "2"], " ", 
                   SuperscriptBox[
                    RowBox[{"(", 
                    RowBox[{"ka", "+", "kd"}], ")"}], "2"]}]}]], " ", "t"}], 
               "+", 
               RowBox[{"ArcTanh", "[", 
                FractionBox[
                 RowBox[{
                  RowBox[{"cEo", " ", "ka"}], "+", 
                  RowBox[{"cAo", " ", 
                   RowBox[{"(", 
                    RowBox[{"ka", "+", "kd"}], ")"}]}]}], 
                 SqrtBox[
                  RowBox[{
                   RowBox[{
                    SuperscriptBox["cEo", "2"], " ", 
                    SuperscriptBox["ka", "2"]}], "+", 
                   RowBox[{"2", " ", "cAo", " ", "cEo", " ", "ka", " ", 
                    RowBox[{"(", 
                    RowBox[{
                    RowBox[{"-", "ka"}], "+", "kd"}], ")"}]}], "+", 
                   RowBox[{
                    SuperscriptBox["cAo", "2"], " ", 
                    SuperscriptBox[
                    RowBox[{"(", 
                    RowBox[{"ka", "+", "kd"}], ")"}], "2"]}]}]]], "]"}]}], 
              "]"}], "2"]}], "+", 
           RowBox[{
            RowBox[{"(", 
             RowBox[{"cEo", " ", "ka", " ", "kd", " ", 
              RowBox[{"(", 
               RowBox[{
                RowBox[{
                 SuperscriptBox["cEo", "2"], " ", 
                 SuperscriptBox["ka", "2"]}], "+", 
                RowBox[{"2", " ", "cAo", " ", "cEo", " ", "ka", " ", 
                 RowBox[{"(", 
                  RowBox[{
                   RowBox[{"-", "ka"}], "+", "kd"}], ")"}]}], "+", 
                RowBox[{
                 SuperscriptBox["cAo", "2"], " ", 
                 SuperscriptBox[
                  RowBox[{"(", 
                   RowBox[{"ka", "+", "kd"}], ")"}], "2"]}]}], ")"}], " ", 
              SuperscriptBox[
               RowBox[{"Sech", "[", 
                RowBox[{
                 RowBox[{
                  FractionBox["1", "2"], " ", 
                  SqrtBox[
                   RowBox[{
                    RowBox[{
                    SuperscriptBox["cEo", "2"], " ", 
                    SuperscriptBox["ka", "2"]}], "+", 
                    RowBox[{"2", " ", "cAo", " ", "cEo", " ", "ka", " ", 
                    RowBox[{"(", 
                    RowBox[{
                    RowBox[{"-", "ka"}], "+", "kd"}], ")"}]}], "+", 
                    RowBox[{
                    SuperscriptBox["cAo", "2"], " ", 
                    SuperscriptBox[
                    RowBox[{"(", 
                    RowBox[{"ka", "+", "kd"}], ")"}], "2"]}]}]], " ", "t"}], 
                 "+", 
                 RowBox[{"ArcTanh", "[", 
                  FractionBox[
                   RowBox[{
                    RowBox[{"cEo", " ", "ka"}], "+", 
                    RowBox[{"cAo", " ", 
                    RowBox[{"(", 
                    RowBox[{"ka", "+", "kd"}], ")"}]}]}], 
                   SqrtBox[
                    RowBox[{
                    RowBox[{
                    SuperscriptBox["cEo", "2"], " ", 
                    SuperscriptBox["ka", "2"]}], "+", 
                    RowBox[{"2", " ", "cAo", " ", "cEo", " ", "ka", " ", 
                    RowBox[{"(", 
                    RowBox[{
                    RowBox[{"-", "ka"}], "+", "kd"}], ")"}]}], "+", 
                    RowBox[{
                    SuperscriptBox["cAo", "2"], " ", 
                    SuperscriptBox[
                    RowBox[{"(", 
                    RowBox[{"ka", "+", "kd"}], ")"}], "2"]}]}]]], "]"}]}], 
                "]"}], "2"]}], ")"}], "/", 
            RowBox[{"(", 
             RowBox[{
              RowBox[{"(", 
               RowBox[{"ka", "+", "kd"}], ")"}], " ", 
              RowBox[{"(", 
               RowBox[{
                RowBox[{"cEo", " ", "ka", " ", 
                 RowBox[{"(", 
                  RowBox[{"ka", "-", "kd"}], ")"}]}], "-", 
                RowBox[{"cAo", " ", 
                 SuperscriptBox[
                  RowBox[{"(", 
                   RowBox[{"ka", "+", "kd"}], ")"}], "2"]}], "+", 
                RowBox[{
                 RowBox[{"(", 
                  RowBox[{"ka", "+", "kd"}], ")"}], " ", 
                 SqrtBox[
                  RowBox[{
                   RowBox[{
                    SuperscriptBox["cEo", "2"], " ", 
                    SuperscriptBox["ka", "2"]}], "+", 
                   RowBox[{"2", " ", "cAo", " ", "cEo", " ", "ka", " ", 
                    RowBox[{"(", 
                    RowBox[{
                    RowBox[{"-", "ka"}], "+", "kd"}], ")"}]}], "+", 
                   RowBox[{
                    SuperscriptBox["cAo", "2"], " ", 
                    SuperscriptBox[
                    RowBox[{"(", 
                    RowBox[{"ka", "+", "kd"}], ")"}], "2"]}]}]], " ", 
                 RowBox[{"Tanh", "[", 
                  RowBox[{
                   RowBox[{
                    FractionBox["1", "2"], " ", 
                    SqrtBox[
                    RowBox[{
                    RowBox[{
                    SuperscriptBox["cEo", "2"], " ", 
                    SuperscriptBox["ka", "2"]}], "+", 
                    RowBox[{"2", " ", "cAo", " ", "cEo", " ", "ka", " ", 
                    RowBox[{"(", 
                    RowBox[{
                    RowBox[{"-", "ka"}], "+", "kd"}], ")"}]}], "+", 
                    RowBox[{
                    SuperscriptBox["cAo", "2"], " ", 
                    SuperscriptBox[
                    RowBox[{"(", 
                    RowBox[{"ka", "+", "kd"}], ")"}], "2"]}]}]], " ", "t"}], 
                   "+", 
                   RowBox[{"ArcTanh", "[", 
                    FractionBox[
                    RowBox[{
                    RowBox[{"cEo", " ", "ka"}], "+", 
                    RowBox[{"cAo", " ", 
                    RowBox[{"(", 
                    RowBox[{"ka", "+", "kd"}], ")"}]}]}], 
                    SqrtBox[
                    RowBox[{
                    RowBox[{
                    SuperscriptBox["cEo", "2"], " ", 
                    SuperscriptBox["ka", "2"]}], "+", 
                    RowBox[{"2", " ", "cAo", " ", "cEo", " ", "ka", " ", 
                    RowBox[{"(", 
                    RowBox[{
                    RowBox[{"-", "ka"}], "+", "kd"}], ")"}]}], "+", 
                    RowBox[{
                    SuperscriptBox["cAo", "2"], " ", 
                    SuperscriptBox[
                    RowBox[{"(", 
                    RowBox[{"ka", "+", "kd"}], ")"}], "2"]}]}]]], "]"}]}], 
                  "]"}]}]}], ")"}]}], ")"}]}]}], ")"}]}]}], ";", 
       "\[IndentingNewLine]", 
       RowBox[{"eqAss", "=", 
        FractionBox[
         RowBox[{"2", " ", "cAo", " ", "cEo", " ", 
          SuperscriptBox["\[ExponentialE]", 
           RowBox[{"-", 
            FractionBox[
             RowBox[{"2", " ", "cEo", " ", "ka", " ", "kd", " ", "t"}], 
             RowBox[{"ka", "+", "kd"}]]}]], " ", "ka", " ", "kd"}], 
         RowBox[{"ka", "+", "kd"}]]}], ";", "\[IndentingNewLine]", 
       RowBox[{"eqEns", "=", 
        RowBox[{
         RowBox[{
          RowBox[{"cE", "'"}], "[", "t", "]"}], "/.", "soln"}]}], ";", 
       "\[IndentingNewLine]", 
       RowBox[{"eqEn2", "=", 
        RowBox[{
         FractionBox["1", 
          RowBox[{"4", " ", "ka"}]], 
         RowBox[{"(", 
          RowBox[{
           RowBox[{
            SuperscriptBox["cEo", "2"], " ", 
            SuperscriptBox["ka", "2"]}], "+", 
           RowBox[{"2", " ", "cAo", " ", "cEo", " ", "ka", " ", 
            RowBox[{"(", 
             RowBox[{
              RowBox[{"-", "ka"}], "+", "kd"}], ")"}]}], "+", 
           RowBox[{
            SuperscriptBox["cAo", "2"], " ", 
            SuperscriptBox[
             RowBox[{"(", 
              RowBox[{"ka", "+", "kd"}], ")"}], "2"]}]}], ")"}], " ", 
         SuperscriptBox[
          RowBox[{"Sech", "[", 
           RowBox[{
            RowBox[{
             FractionBox["1", "2"], " ", 
             SqrtBox[
              RowBox[{
               RowBox[{
                SuperscriptBox["cEo", "2"], " ", 
                SuperscriptBox["ka", "2"]}], "+", 
               RowBox[{"2", " ", "cAo", " ", "cEo", " ", "ka", " ", 
                RowBox[{"(", 
                 RowBox[{
                  RowBox[{"-", "ka"}], "+", "kd"}], ")"}]}], "+", 
               RowBox[{
                SuperscriptBox["cAo", "2"], " ", 
                SuperscriptBox[
                 RowBox[{"(", 
                  RowBox[{"ka", "+", "kd"}], ")"}], "2"]}]}]], " ", "t"}], 
            "+", 
            RowBox[{"ArcTanh", "[", 
             FractionBox[
              RowBox[{
               RowBox[{"cEo", " ", "ka"}], "+", 
               RowBox[{"cAo", " ", 
                RowBox[{"(", 
                 RowBox[{"ka", "+", "kd"}], ")"}]}]}], 
              SqrtBox[
               RowBox[{
                RowBox[{
                 SuperscriptBox["cEo", "2"], " ", 
                 SuperscriptBox["ka", "2"]}], "+", 
                RowBox[{"2", " ", "cAo", " ", "cEo", " ", "ka", " ", 
                 RowBox[{"(", 
                  RowBox[{
                   RowBox[{"-", "ka"}], "+", "kd"}], ")"}]}], "+", 
                RowBox[{
                 SuperscriptBox["cAo", "2"], " ", 
                 SuperscriptBox[
                  RowBox[{"(", 
                   RowBox[{"ka", "+", "kd"}], ")"}], "2"]}]}]]], "]"}]}], 
           "]"}], "2"]}]}], ";", "\[IndentingNewLine]", 
       RowBox[{"eqEss", "=", "0"}], ";", "\[IndentingNewLine]", 
       RowBox[{"plot1", "=", 
        RowBox[{"Plot", "[", 
         RowBox[{
          RowBox[{"{", 
           RowBox[{
           "eqAns", ",", "eqAn2", ",", "eqAss", ",", "eqEns", ",", "eqEn2", 
            ",", "eqEss"}], "}"}], ",", 
          RowBox[{"{", 
           RowBox[{"t", ",", "0.02", ",", "250"}], "}"}], ",", 
          "\[IndentingNewLine]", 
          RowBox[{"Evaluate", "@", "PingPongModel1"}], ",", 
          "\[IndentingNewLine]", 
          RowBox[{"PlotStyle", "\[Rule]", 
           RowBox[{"{", 
            RowBox[{
             RowBox[{"{", 
              RowBox[{"Thick", ",", 
               RowBox[{"Darker", "[", "Green", "]"}]}], "}"}], ",", 
             RowBox[{"{", 
              RowBox[{"Thick", ",", "Blue"}], "}"}], ",", 
             RowBox[{"{", 
              RowBox[{"Thick", ",", "Pink"}], "}"}], ",", 
             RowBox[{"{", 
              RowBox[{"Thick", ",", 
               RowBox[{"Darker", "[", "Brown", "]"}]}], "}"}], ",", 
             RowBox[{"{", 
              RowBox[{"Thin", ",", "Green"}], "}"}], ",", 
             RowBox[{"{", 
              RowBox[{"Thick", ",", "Brown"}], "}"}]}], "}"}]}], ",", 
          "\[IndentingNewLine]", 
          RowBox[{"Epilog", "\[Rule]", 
           RowBox[{"{", 
            RowBox[{
             RowBox[{"Inset", "[", 
              RowBox[{
               RowBox[{"Style", "[", 
                RowBox[{
                "\"\<-[A]\!\(\*SubscriptBox[\('\), \(ns\)]\)\>\"", ",", "12", 
                 ",", 
                 RowBox[{"Background", "\[Rule]", "White"}]}], "]"}], ",", 
               RowBox[{"{", 
                RowBox[{"25", ",", 
                 RowBox[{
                  RowBox[{"0.01", "-", 
                   RowBox[{
                    RowBox[{"cA", "'"}], "[", "25", "]"}]}], "/.", 
                  RowBox[{"soln", "[", 
                   RowBox[{"[", "1", "]"}], "]"}]}]}], "}"}]}], "]"}], ",", 
             "\[IndentingNewLine]", 
             RowBox[{"Inset", "[", 
              RowBox[{
               RowBox[{"Style", "[", 
                RowBox[{
                "\"\<-[A]\!\(\*SubscriptBox[\('\), \(n = 2\)]\)\>\"", ",", 
                 "12", ",", 
                 RowBox[{"Background", "\[Rule]", "White"}]}], "]"}], ",", 
               RowBox[{"{", 
                RowBox[{"20", ",", 
                 RowBox[{"eqAn2", "/.", 
                  RowBox[{"t", "\[Rule]", "40"}]}]}], "}"}]}], "]"}], ",", 
             "\[IndentingNewLine]", 
             RowBox[{"Inset", "[", 
              RowBox[{
               RowBox[{"Style", "[", 
                RowBox[{
                "\"\<-[A]\!\(\*SubscriptBox[\('\), \(ss\)]\)\>\"", ",", "12", 
                 ",", 
                 RowBox[{"Background", "\[Rule]", "White"}]}], "]"}], ",", 
               RowBox[{"{", 
                RowBox[{"175", ",", 
                 RowBox[{
                  RowBox[{"0.005", "+", "eqAss"}], "/.", 
                  RowBox[{"t", "\[Rule]", "175"}]}]}], "}"}]}], "]"}], ",", 
             RowBox[{"Inset", "[", 
              RowBox[{
               RowBox[{"Style", "[", 
                RowBox[{
                "\"\<[E]\!\(\*SubscriptBox[\('\), \(ns\)]\)\>\"", ",", "12", 
                 ",", 
                 RowBox[{"Background", "\[Rule]", "White"}]}], "]"}], ",", 
               RowBox[{"{", 
                RowBox[{"45", ",", 
                 RowBox[{
                  RowBox[{
                   RowBox[{"-", "0.01"}], "-", 
                   RowBox[{
                    RowBox[{"cE", "'"}], "[", "45", "]"}]}], "/.", 
                  RowBox[{"soln", "[", 
                   RowBox[{"[", "1", "]"}], "]"}]}]}], "}"}]}], "]"}], ",", 
             "\[IndentingNewLine]", 
             RowBox[{"Inset", "[", 
              RowBox[{
               RowBox[{"Style", "[", 
                RowBox[{
                "\"\<[E]\!\(\*SubscriptBox[\('\), \(n = 2\)]\)\>\"", ",", 
                 "12", ",", 
                 RowBox[{"Background", "\[Rule]", "White"}]}], "]"}], ",", 
               RowBox[{"{", 
                RowBox[{"10", ",", 
                 RowBox[{
                  RowBox[{"0.004", "+", "eqEn2"}], "/.", 
                  RowBox[{"t", "\[Rule]", "20"}]}]}], "}"}]}], "]"}], ",", 
             "\[IndentingNewLine]", 
             RowBox[{"Inset", "[", 
              RowBox[{
               RowBox[{"Style", "[", 
                RowBox[{
                "\"\<[E]\!\(\*SubscriptBox[\('\), \(ss\)]\)\>\"", ",", "12", 
                 ",", 
                 RowBox[{"Background", "\[Rule]", "White"}]}], "]"}], ",", 
               RowBox[{"{", 
                RowBox[{"225", ",", 
                 RowBox[{
                  RowBox[{"0.005", "+", "eqEss"}], "/.", 
                  RowBox[{"t", "\[Rule]", "225"}]}]}], "}"}]}], "]"}]}], 
            "}"}]}]}], "]"}]}], ";", "\[IndentingNewLine]", 
       RowBox[{"Pane", "[", "\[IndentingNewLine]", 
        RowBox[{
         RowBox[{"Switch", "[", 
          RowBox[{"PingPong", ",", "\[IndentingNewLine]", "1", ",", 
           RowBox[{"Show", "[", "plot1", "]"}]}], "\[IndentingNewLine]", 
          "]"}], ",", 
         RowBox[{"ImageSize", "\[Rule]", 
          RowBox[{"1.2", 
           RowBox[{"{", 
            RowBox[{"480", ",", "310"}], "}"}]}]}]}], "]"}]}]}], "]"}], ",", 
    "\[IndentingNewLine]", 
    RowBox[{"Row", "[", 
     RowBox[{"{", "\[IndentingNewLine]", 
      RowBox[{
       RowBox[{"Column", "[", 
        RowBox[{"{", "\[IndentingNewLine]", "\[IndentingNewLine]", 
         RowBox[{
          RowBox[{"Style", "[", 
           RowBox[{"\"\<REACTANTS CONCENTRATIONS:\>\"", ",", "Bold"}], "]"}], 
          ",", "\[IndentingNewLine]", 
          RowBox[{"Control", "@", 
           RowBox[{"{", 
            RowBox[{
             RowBox[{"{", 
              RowBox[{
              "cAo", ",", "10", ",", 
               "\"\<[A\!\(\*SubscriptBox[\(]\), \
\(0\)]\),\!\(\*FormBox[RowBox[{\" \", RowBox[{\"mol\", \" \", \
SuperscriptBox[RowBox[{StyleBox[\"m\",FontSlant->\"Plain\"], \" \"}], \
RowBox[{\"\[Dash]\", \"3\"}]]}]}],TraditionalForm]\)\>\""}], "}"}], ",", 
             "0.1", ",", "20", ",", 
             RowBox[{"Appearance", "\[Rule]", "\"\<Labeled\>\""}]}], "}"}]}], 
          ",", "\[IndentingNewLine]", 
          RowBox[{"Control", "@", 
           RowBox[{"{", 
            RowBox[{
             RowBox[{"{", 
              RowBox[{
              "cEo", ",", "1", ",", 
               "\"\<[E\!\(\*SubscriptBox[\(]\), \
\(0\)]\),\!\(\*FormBox[RowBox[{\" \", RowBox[{\"mol\", \" \", \
SuperscriptBox[RowBox[{StyleBox[\"m\",FontSlant->\"Plain\"], \" \"}], \
RowBox[{\"\[Dash]\", \"3\"}]]}]}],TraditionalForm]\)\>\""}], "}"}], ",", 
             "0.1", ",", "2", ",", 
             RowBox[{"Appearance", "\[Rule]", "\"\<Labeled\>\""}]}], "}"}]}], 
          ",", "\[IndentingNewLine]", 
          RowBox[{"Control", "@", 
           RowBox[{"{", 
            RowBox[{
             RowBox[{"{", 
              RowBox[{
              "cFo", ",", "0", ",", 
               "\"\<[F\!\(\*SubscriptBox[\(]\), \
\(0\)]\),\!\(\*FormBox[RowBox[{\" \", RowBox[{\"mol\", \" \", \
SuperscriptBox[RowBox[{StyleBox[\"m\",FontSlant->\"Plain\"], \" \"}], \
RowBox[{\"\[Dash]\", \"3\"}]]}]}],TraditionalForm]\)\>\""}], "}"}], ",", "0", 
             ",", "0", ",", 
             RowBox[{"Appearance", "\[Rule]", "\"\<Labeled\>\""}]}], "}"}]}], 
          ",", "\[IndentingNewLine]", 
          RowBox[{"Control", "@", 
           RowBox[{"{", 
            RowBox[{
             RowBox[{"{", 
              RowBox[{
              "cPo", ",", "0", ",", 
               "\"\<[P\!\(\*SubscriptBox[\(]\), \
\(0\)]\),\!\(\*FormBox[RowBox[{\" \", RowBox[{\"mol\", \" \", \
SuperscriptBox[RowBox[{StyleBox[\"m\",FontSlant->\"Plain\"], \" \"}], \
RowBox[{\"\[Dash]\", \"3\"}]]}]}],TraditionalForm]\)\>\""}], "}"}], ",", "0", 
             ",", "0", ",", 
             RowBox[{"Appearance", "\[Rule]", "\"\<Labeled\>\""}]}], "}"}]}], 
          ",", "\[IndentingNewLine]", 
          RowBox[{"Control", "@", 
           RowBox[{"{", 
            RowBox[{
             RowBox[{"{", 
              RowBox[{
              "cQo", ",", "0", ",", 
               "\"\<[Q\!\(\*SubscriptBox[\(]\), \
\(0\)]\),\!\(\*FormBox[RowBox[{\" \", RowBox[{\"mol\", \" \", \
SuperscriptBox[RowBox[{StyleBox[\"m\",FontSlant->\"Plain\"], \" \"}], \
RowBox[{\"\[Dash]\", \"3\"}]]}]}],TraditionalForm]\)\>\""}], "}"}], ",", "0", 
             ",", "0", ",", 
             RowBox[{"Appearance", "\[Rule]", "\"\<Labeled\>\""}]}], 
            "}"}]}]}], "\[IndentingNewLine]", "}"}], "]"}], ",", 
       "\[IndentingNewLine]", 
       RowBox[{"Column", "[", 
        RowBox[{"{", "\[IndentingNewLine]", "\[IndentingNewLine]", 
         RowBox[{
          RowBox[{"Style", "[", 
           RowBox[{"\"\<RATE CONSTANTS:\>\"", ",", "Bold"}], "]"}], ",", 
          "\[IndentingNewLine]", 
          RowBox[{"Control", "@", 
           RowBox[{"{", 
            RowBox[{
             RowBox[{"{", 
              RowBox[{
              "ka", ",", "0.006", ",", 
               "\"\<\!\(\*SubscriptBox[StyleBox[\"k\",FontSlant->\"Italic\"], \
\"a\"]\), \
\!\(\*FormBox[RowBox[{SuperscriptBox[StyleBox[\"s\",FontSlant->\"Plain\"], \
RowBox[{\"\[Dash]\", \"1\"}]], \" \", SuperscriptBox[\"mol\", RowBox[{\"\
\[Dash]\", \"1\"}]], \" \", \
SuperscriptBox[StyleBox[\"m\",FontSlant->\"Plain\"], \
\"3\"]}],TraditionalForm]\)\>\""}], "}"}], ",", "0.001", ",", "0.012", ",", 
             RowBox[{"Appearance", "\[Rule]", "\"\<Labeled\>\""}]}], "}"}]}], 
          ",", "\[IndentingNewLine]", 
          RowBox[{"Control", "@", 
           RowBox[{"{", 
            RowBox[{
             RowBox[{"{", 
              RowBox[{
              "kd", ",", "0.003", ",", 
               "\"\<\!\(\*SubscriptBox[StyleBox[\"k\",FontSlant->\"Italic\"], \
\"d\"]\), \
\!\(\*FormBox[RowBox[{SuperscriptBox[StyleBox[\"s\",FontSlant->\"Plain\"], \
RowBox[{\"\[Dash]\", \"1\"}]], \" \", SuperscriptBox[\"mol\", RowBox[{\"\
\[Dash]\", \"1\"}]], \" \", \
SuperscriptBox[StyleBox[\"m\",FontSlant->\"Plain\"], \
\"3\"]}],TraditionalForm]\)\>\""}], "}"}], ",", "0.001", ",", "0.006", ",", 
             RowBox[{"Appearance", "\[Rule]", "\"\<Labeled\>\""}]}], 
            "}"}]}]}], "\[IndentingNewLine]", "}"}], "]"}], ",", 
       "\[IndentingNewLine]", 
       RowBox[{"Control", "@", 
        RowBox[{"{", 
         RowBox[{
          RowBox[{"{", 
           RowBox[{"PingPong", ",", "1", ",", "\"\<Panel\>\""}], "}"}], ",", 
          RowBox[{"{", "\[IndentingNewLine]", 
           RowBox[{"1", "\[Rule]", "\"\<A\>\""}], "\[IndentingNewLine]", 
           "}"}], ",", 
          RowBox[{"ControlType", "\[Rule]", "Setter"}]}], "}"}]}]}], "}"}], 
     "]"}]}], "\[IndentingNewLine]", "]"}], "\[IndentingNewLine]"}]], "Input",
 CellChangeTimes->{{3.841749732856798*^9, 3.841749906918338*^9}, {
   3.841750053788534*^9, 3.8417500568715334`*^9}, {3.8418036925935926`*^9, 
   3.841803706752474*^9}, {3.8418037607203846`*^9, 3.841803774188929*^9}, {
   3.8418038073567395`*^9, 3.8418038499275484`*^9}, 3.841803904405038*^9, {
   3.8418053228201857`*^9, 3.841805323938447*^9}, {3.841805430221315*^9, 
   3.841805430784861*^9}, {3.8418056712220964`*^9, 3.8418056725014286`*^9}, {
   3.841836424378595*^9, 3.8418364269817724`*^9}, {3.8418867914336452`*^9, 
   3.841886853106645*^9}, {3.841886891238326*^9, 3.8418869414298725`*^9}, {
   3.8418871779836135`*^9, 3.8418871986816463`*^9}, {3.8418872411875305`*^9, 
   3.841887251013095*^9}, {3.84188731368587*^9, 3.8418873297914915`*^9}, {
   3.8418874752412233`*^9, 3.8418874765690117`*^9}, 3.8418875913857713`*^9, {
   3.841887944680502*^9, 3.841888206986114*^9}, {3.8418882799062786`*^9, 
   3.8418882862487326`*^9}, {3.8418883519361906`*^9, 3.841888407829341*^9}, {
   3.8418884538187127`*^9, 3.8418884964492006`*^9}, {3.8420104553380365`*^9, 
   3.842010456105392*^9}, {3.842010501475397*^9, 3.8420105017222424`*^9}, 
   3.8420105393949304`*^9, {3.8466571293324575`*^9, 3.8466571443435946`*^9}, {
   3.846657370778998*^9, 3.8466574869332204`*^9}, {3.846657601401836*^9, 
   3.846657689884245*^9}, 3.846658199217289*^9, {3.8466582422685738`*^9, 
   3.8466583553051624`*^9}, {3.8466583890306325`*^9, 3.846658445869364*^9}, {
   3.8466587017050686`*^9, 3.846658727875573*^9}, {3.8466589044445233`*^9, 
   3.846658923562812*^9}, {3.8466590107398157`*^9, 3.846659080311597*^9}, {
   3.846659127976855*^9, 3.846659128101828*^9}, {3.8466591912168427`*^9, 
   3.8466592481487646`*^9}, {3.8466594766550484`*^9, 3.846659533599231*^9}, {
   3.84665958437168*^9, 3.846659863675767*^9}, {3.8466598938799286`*^9, 
   3.846660059514933*^9}, {3.846669158921476*^9, 3.846669160540101*^9}, {
   3.846669210254387*^9, 3.8466695226397595`*^9}, {3.8466696739300594`*^9, 
   3.846669700555784*^9}, {3.846669733667065*^9, 3.846669830943153*^9}, {
   3.846669942941931*^9, 3.846669970183852*^9}, {3.8466700023530407`*^9, 
   3.846670003337158*^9}, {3.846670285534099*^9, 3.8466702962801914`*^9}, 
   3.846670457513308*^9, {3.846670500562671*^9, 3.8466705275347214`*^9}, {
   3.8466707719949465`*^9, 3.8466708730671043`*^9}, {3.8466709531558485`*^9, 
   3.8466710349452095`*^9}, {3.8466710720817604`*^9, 3.84667111103518*^9}, {
   3.8466711412342763`*^9, 3.8466712050839252`*^9}, {3.846671240711611*^9, 
   3.846671300266326*^9}, {3.846671342372938*^9, 3.8466714524283266`*^9}, {
   3.8466715047371726`*^9, 3.846671713659568*^9}, {3.8466722931171083`*^9, 
   3.8466723395722675`*^9}, 3.846672384048112*^9, {3.846739969188094*^9, 
   3.846739972171768*^9}, 3.846745658041407*^9, 3.846746398433676*^9, {
   3.846764496223112*^9, 3.846764552952351*^9}, {3.8472766347056165`*^9, 
   3.847276669849394*^9}, {3.847276713138187*^9, 3.847276721757236*^9}, {
   3.8472770823160067`*^9, 3.8472771436873293`*^9}, {3.847277313528089*^9, 
   3.8472773203345337`*^9}, {3.847277416301323*^9, 3.8472774310812693`*^9}, {
   3.8472774750157623`*^9, 3.847277479177511*^9}, {3.8472775316318893`*^9, 
   3.8472775758940177`*^9}, {3.8472776543078303`*^9, 
   3.8472776815826125`*^9}, {3.8472820829125304`*^9, 3.847282101713642*^9}, {
   3.847282202644628*^9, 3.8472822104353604`*^9}, {3.847282267459462*^9, 
   3.847282310564173*^9}, {3.8472823596584167`*^9, 3.847282370012159*^9}, {
   3.84728242923578*^9, 3.847282460379707*^9}, 3.8472825661218014`*^9, {
   3.847282602620706*^9, 3.847282614768936*^9}, {3.847335149022919*^9, 
   3.8473351951998057`*^9}, {3.847335255588388*^9, 3.8473352622853622`*^9}, 
   3.847335299620603*^9, {3.847335579443143*^9, 3.847335608350524*^9}, {
   3.8473356424322844`*^9, 3.84733571358677*^9}, {3.8473357501219473`*^9, 
   3.8473359066759663`*^9}, {3.847336046522848*^9, 3.847336053503533*^9}, {
   3.8473361964772964`*^9, 3.847336200021795*^9}, {3.8473362736531377`*^9, 
   3.847336288747509*^9}, {3.8473481034081535`*^9, 3.8473481111240797`*^9}, {
   3.848382018287554*^9, 3.8483820505924406`*^9}, {3.8483820856130686`*^9, 
   3.8483821106696844`*^9}, {3.848382145520816*^9, 3.8483821466143074`*^9}, 
   3.848382193853175*^9, {3.8483823158244123`*^9, 3.8483823864694166`*^9}, {
   3.8483824661294794`*^9, 3.848382489858067*^9}, {3.848382561091242*^9, 
   3.848382564293646*^9}, {3.851685314669648*^9, 3.8516853345712028`*^9}, {
   3.851685467649209*^9, 3.8516855020422287`*^9}, {3.8516869238465166`*^9, 
   3.85168695982136*^9}, {3.8516872104938073`*^9, 3.8516872120405083`*^9}, {
   3.851687248756606*^9, 3.8516872707514334`*^9}, {3.8516878641505013`*^9, 
   3.8516880498282366`*^9}, {3.8516882835180893`*^9, 3.851688291032139*^9}, {
   3.851688381385642*^9, 3.85168840174336*^9}, {3.851688516903908*^9, 
   3.8516885512922974`*^9}, 3.8516888509872847`*^9, {3.8516890734305644`*^9, 
   3.8516890753207664`*^9}, 3.8517484648140383`*^9, {3.8517485281857347`*^9, 
   3.8517485619332514`*^9}, 3.8517486580512123`*^9, {3.8517513588686676`*^9, 
   3.8517514073309526`*^9}, {3.851751441541626*^9, 3.851751533068022*^9}, {
   3.851751605597808*^9, 3.851751650071472*^9}, {3.851751914649771*^9, 
   3.8517519306772113`*^9}, {3.8517539209566264`*^9, 3.851753921518944*^9}, {
   3.8517540049156313`*^9, 3.851754040623369*^9}, {3.8517541342577877`*^9, 
   3.851754134913883*^9}, {3.851755580791625*^9, 3.851755632282189*^9}, {
   3.85175566732077*^9, 3.85175576897163*^9}, {3.8517559092694125`*^9, 
   3.8517560125106993`*^9}, {3.851756148759842*^9, 3.8517561999442496`*^9}, {
   3.8517562786755133`*^9, 3.85175632121237*^9}, {3.85175638008928*^9, 
   3.8517564265781727`*^9}, {3.851756473982087*^9, 3.851756555509982*^9}, {
   3.8517565928446894`*^9, 3.851756625102707*^9}, {3.8517567124475203`*^9, 
   3.8517567340361834`*^9}, {3.851756821984413*^9, 3.8517568226248865`*^9}, {
   3.851756969730645*^9, 3.851757070910103*^9}, {3.851757110244399*^9, 
   3.851757111275406*^9}, {3.851757569353534*^9, 3.851757600992166*^9}, {
   3.851757676019738*^9, 3.85175767789157*^9}, {3.8517588302002554`*^9, 
   3.8517588878013997`*^9}, {3.851759072157569*^9, 3.85175907351406*^9}, {
   3.8517591552706633`*^9, 3.851759156705036*^9}, {3.851773137829807*^9, 
   3.851773169748623*^9}, {3.851773221229227*^9, 3.851773236357489*^9}, {
   3.8517733236279716`*^9, 3.8517733853129454`*^9}, {3.8517736188601284`*^9, 
   3.8517736258686404`*^9}, {3.8517737335668736`*^9, 3.851773738860039*^9}, 
   3.85177424731844*^9, {3.8517744746512675`*^9, 3.8517745447581444`*^9}, {
   3.851774585179755*^9, 3.851774618308499*^9}, {3.8517746807891307`*^9, 
   3.851774793080097*^9}, {3.851774873581607*^9, 3.8517749417219224`*^9}, {
   3.8517749856665754`*^9, 3.851775069507588*^9}, {3.8517774656545877`*^9, 
   3.851777466404437*^9}, {3.851777829092969*^9, 3.851777904166011*^9}, {
   3.8517781493109093`*^9, 3.8517782678252363`*^9}, {3.8517783179878016`*^9, 
   3.8517783821043415`*^9}, {3.85177841694917*^9, 3.851778454471308*^9}, {
   3.8517786093640203`*^9, 3.851778649402458*^9}, {3.851778683091739*^9, 
   3.851778693952546*^9}, 3.8517787333336506`*^9, {3.851778860073439*^9, 
   3.8517789122839394`*^9}, 3.851778952979082*^9, {3.8517791570067186`*^9, 
   3.8517791968098183`*^9}, {3.8517792312940693`*^9, 3.851779232715418*^9}, {
   3.8517792716194496`*^9, 3.851779379340855*^9}, {3.851779414021425*^9, 
   3.851779437226183*^9}, {3.8517794772943573`*^9, 3.8517795285549793`*^9}, 
   3.851779599409135*^9, {3.851947825131568*^9, 3.8519478397101264`*^9}, {
   3.8519479427752776`*^9, 3.851948080565038*^9}, {3.85194815725144*^9, 
   3.8519482112936525`*^9}, {3.8519482513071823`*^9, 3.851948300685818*^9}, {
   3.8519483467633505`*^9, 3.851948421926777*^9}, {3.854599917707138*^9, 
   3.854600013569354*^9}, {3.854712805139721*^9, 3.854712813811827*^9}, 
   3.85471512724292*^9, 3.8547154313136697`*^9, 3.854715541926668*^9, 
   3.854715944297141*^9, 3.8547754142715487`*^9, {3.8547755264962225`*^9, 
   3.8547755281675076`*^9}, {3.8547757270426426`*^9, 3.854775759334991*^9}, {
   3.8547757926492653`*^9, 3.85477579305542*^9}, {3.8547768647573757`*^9, 
   3.854776888796584*^9}, {3.8547769897774916`*^9, 3.854777019479389*^9}, {
   3.8547782128710985`*^9, 3.854778230252418*^9}, {3.8551982248697605`*^9, 
   3.855198277906287*^9}, {3.8551983360656457`*^9, 3.855198378165367*^9}, {
   3.855198503562776*^9, 3.855198531540599*^9}, {3.8551986228954463`*^9, 
   3.855198632533785*^9}, {3.8551987815217276`*^9, 3.855198791160095*^9}, {
   3.8552109863220525`*^9, 3.855210987618623*^9}, 3.855214762411118*^9, {
   3.856011846562994*^9, 3.856011846734826*^9}, 3.8560878091302457`*^9, 
   3.856087843090822*^9, {3.8560879184455433`*^9, 3.856087963059487*^9}, {
   3.8560880649683847`*^9, 3.856088202612194*^9}, 3.856088353238575*^9, {
   3.8560883909865675`*^9, 3.8560884115561733`*^9}, {3.8560884566794767`*^9, 
   3.856088466752247*^9}, {3.8560892251039495`*^9, 3.856089228351763*^9}, 
   3.8560897910955305`*^9, 3.856090309417139*^9, {3.8560904253453856`*^9, 
   3.8560904291870055`*^9}, {3.856091411499737*^9, 3.8560914171155396`*^9}, 
   3.8560914677276793`*^9, {3.8560929829811707`*^9, 3.8560930025763435`*^9}, {
   3.856093034916766*^9, 3.856093040136408*^9}, 3.8560936656415873`*^9, {
   3.8560946746845627`*^9, 3.8560947386523623`*^9}, 3.8560948723914704`*^9, {
   3.8560949180506277`*^9, 3.8560949209652853`*^9}, {3.8560949813293114`*^9, 
   3.8560949895195255`*^9}, {3.856096770884041*^9, 3.8560967982143965`*^9}, {
   3.8562662119601536`*^9, 3.8562662387117453`*^9}, {3.8562662738353577`*^9, 
   3.85626634798162*^9}, {3.8562664068280306`*^9, 3.8562664493400946`*^9}, {
   3.856266491656769*^9, 3.8562665542320075`*^9}, {3.8562666093858414`*^9, 
   3.856266616914109*^9}, 3.8562666503855114`*^9, 3.856266731222801*^9, {
   3.8562667623716664`*^9, 3.856266763340187*^9}, {3.856266817889781*^9, 
   3.8562669903836803`*^9}, {3.856267028970646*^9, 3.8562674280048995`*^9}, {
   3.856267489320221*^9, 3.8562675036762*^9}, {3.8562675747686973`*^9, 
   3.85626772736058*^9}, {3.856268275993417*^9, 3.856268308782513*^9}, {
   3.8562683880938034`*^9, 3.8562684345515585`*^9}, {3.856268464669392*^9, 
   3.856268483055673*^9}, {3.856268600184104*^9, 3.8562686093384027`*^9}, {
   3.8562686627942486`*^9, 3.8562686713562837`*^9}, {3.856268715189642*^9, 
   3.85626872318774*^9}, {3.8562688858849354`*^9, 3.8562689033964076`*^9}, {
   3.8562689706460557`*^9, 3.8562689783161087`*^9}, {3.8562690119511585`*^9, 
   3.856269027838032*^9}, {3.8562692047059155`*^9, 3.8562692060962067`*^9}, {
   3.8562692889079857`*^9, 3.8562692982027073`*^9}, {3.856269339677191*^9, 
   3.856269382573267*^9}, {3.856269415565442*^9, 3.856269435654676*^9}, {
   3.8562694723563094`*^9, 3.856269557617446*^9}, {3.856269592702757*^9, 
   3.8562695966393237`*^9}, {3.8562697389401054`*^9, 3.856269757199979*^9}, {
   3.8562698668960752`*^9, 3.8562698804551315`*^9}, 3.8562699452694855`*^9, {
   3.8562700055975056`*^9, 3.856270024858776*^9}, 3.856270062059145*^9, {
   3.8562701015654116`*^9, 3.856270107938883*^9}, {3.8562708100480924`*^9, 
   3.856270885842801*^9}, 3.856270961293467*^9, {3.8562711191233764`*^9, 
   3.8562711470871487`*^9}, {3.8562711940291367`*^9, 
   3.8562712004963613`*^9}, {3.8562712551100063`*^9, 
   3.8562712731059637`*^9}, {3.856271326739816*^9, 3.856271327005192*^9}, 
   3.8562715582179365`*^9, {3.85635050737883*^9, 3.8563505384237394`*^9}, {
   3.8563507814405966`*^9, 3.8563508153988123`*^9}, {3.856403365288825*^9, 
   3.8564033725059032`*^9}, 3.8564034328061533`*^9, {3.856403677833009*^9, 
   3.8564036865653663`*^9}, 3.856403890866742*^9, {3.8564041266115713`*^9, 
   3.8564041422014694`*^9}, 3.8564041731184883`*^9, {3.856416050425877*^9, 
   3.8564160637664623`*^9}, {3.856416280935495*^9, 3.856416287355866*^9}, {
   3.856416959202245*^9, 3.8564169628422403`*^9}, {3.8564170881878357`*^9, 
   3.8564170929365063`*^9}, {3.8564211371406746`*^9, 
   3.8564211381260867`*^9}, {3.8584271961336045`*^9, 3.858427205893742*^9}, 
   3.858429013129891*^9, {3.8584294949592237`*^9, 3.8584294959118695`*^9}, {
   3.858429584832994*^9, 3.8584295943151016`*^9}, 3.8584301369616175`*^9, {
   3.858430339552408*^9, 3.85843034217698*^9}, 3.8584315237909*^9, {
   3.8584315538161883`*^9, 3.858431583077695*^9}, {3.8586481763032894`*^9, 
   3.8586482132321167`*^9}, {3.8586482662196245`*^9, 
   3.8586482788262625`*^9}, {3.8586520958274355`*^9, 
   3.8586520974052067`*^9}, {3.8586521767410717`*^9, 
   3.8586522948195953`*^9}, {3.858652332447443*^9, 3.8586523344626207`*^9}, {
   3.8586524266083574`*^9, 3.858652428795418*^9}, {3.858652466641944*^9, 
   3.8586524687664547`*^9}, 3.858652635278686*^9, 3.8586526698572216`*^9, {
   3.8586527015549583`*^9, 3.8586527915947876`*^9}, {3.8586528245985355`*^9, 
   3.858652908923914*^9}, {3.8586530994435596`*^9, 3.858653197242655*^9}, {
   3.8586532352464437`*^9, 3.8586532454784384`*^9}, {3.8586534506699677`*^9, 
   3.8586535085142584`*^9}, {3.858653623629122*^9, 3.8586536312142105`*^9}, {
   3.8586545877607684`*^9, 3.858654593790846*^9}, {3.858654662936039*^9, 
   3.8586546703699636`*^9}, {3.8586551608986635`*^9, 3.858655207035569*^9}, {
   3.8586552560515184`*^9, 3.858655256691988*^9}, {3.858655294051999*^9, 
   3.8586552945676804`*^9}, {3.8586553251959395`*^9, 3.858655329055599*^9}, {
   3.8586554034905972`*^9, 3.8586554039594183`*^9}, {3.8586562167494545`*^9, 
   3.8586562419891367`*^9}, {3.858656345853464*^9, 3.8586563472281446`*^9}, {
   3.85865642554783*^9, 3.8586564274223795`*^9}, 3.858656609260376*^9, {
   3.8586567791800585`*^9, 3.8586567938415623`*^9}, {3.858656843604476*^9, 
   3.8586568448541813`*^9}, 3.858657264350212*^9, 3.8586578643727827`*^9, {
   3.8586603501435423`*^9, 3.8586603610776873`*^9}, {3.858665299710614*^9, 
   3.858665304568842*^9}, {3.85866660066634*^9, 3.858666631320428*^9}, 
   3.8588324708255205`*^9, 3.858834680023713*^9, {3.858834816319806*^9, 
   3.8588348245678115`*^9}, {3.859371068746986*^9, 3.859371071760897*^9}, {
   3.859371119092376*^9, 3.859371120263667*^9}, {3.86058476409734*^9, 
   3.860584765722186*^9}, {3.860584841536561*^9, 3.8605848473633127`*^9}, {
   3.860584881556029*^9, 3.8605849345190516`*^9}, {3.8605849810705805`*^9, 
   3.860585005457756*^9}, {3.8605850393795395`*^9, 3.8605850418789215`*^9}, {
   3.8605851656060953`*^9, 3.860585194270255*^9}, 3.86063381286031*^9, {
   3.860633853041381*^9, 3.8606338605381393`*^9}, {3.86063401668987*^9, 
   3.8606340194591556`*^9}, {3.8606344973969564`*^9, 
   3.8606345323857527`*^9}, {3.8606351162938786`*^9, 
   3.8606351169534793`*^9}, {3.860635337183052*^9, 3.860635337760549*^9}, {
   3.8606415668765078`*^9, 3.860641595432556*^9}, {3.8606478264186707`*^9, 
   3.860647827262169*^9}, {3.860652123064255*^9, 3.8606521235797577`*^9}, {
   3.860652155786443*^9, 3.8606521736104174`*^9}, 3.8606522667603283`*^9, {
   3.8606696247237062`*^9, 3.8606696733079042`*^9}, {3.860669722427417*^9, 
   3.860669749858634*^9}, {3.8606698523428307`*^9, 3.8606698539051495`*^9}, {
   3.860670121437567*^9, 3.860670162149023*^9}, {3.860670218651143*^9, 
   3.8606702191509986`*^9}, {3.860670257720063*^9, 3.8606702608755703`*^9}, 
   3.860670357321578*^9, {3.8608393202951083`*^9, 3.860839327144682*^9}, {
   3.8608395360225525`*^9, 3.860839568560756*^9}, {3.860839626109659*^9, 
   3.8608396316532125`*^9}, {3.860839972322068*^9, 3.8608399940349*^9}, {
   3.8608404196123*^9, 3.860840428309719*^9}, {3.860840480919987*^9, 
   3.860840481588693*^9}, {3.860840536412998*^9, 3.8608405379998827`*^9}, {
   3.860840633619918*^9, 3.8608406562135906`*^9}, {3.8608407583448086`*^9, 
   3.86084082336386*^9}, {3.8608409345127068`*^9, 3.8608409351678333`*^9}, {
   3.86084105988897*^9, 3.8608410940155354`*^9}, {3.8608413360670547`*^9, 
   3.8608413526004543`*^9}, {3.860841580986247*^9, 3.8608416011112056`*^9}, {
   3.8608422038020997`*^9, 3.860842221049014*^9}, {3.861189494194888*^9, 
   3.861189496865979*^9}, {3.86119056512847*^9, 3.8611905745824733`*^9}, {
   3.8623951441743917`*^9, 3.862395332697236*^9}, 3.8623954053114996`*^9, {
   3.8623954515841923`*^9, 3.862395460222004*^9}, {3.8623954945791407`*^9, 
   3.8623955137183037`*^9}, {3.8752349401678534`*^9, 3.875234961536339*^9}, 
   3.875235172904148*^9, {3.8752352398820295`*^9, 3.875235316197029*^9}, {
   3.8752353506019335`*^9, 3.8752353807075663`*^9}, {3.875235414389227*^9, 
   3.8752354566803694`*^9}, {3.875235529313761*^9, 3.8752355300012703`*^9}, {
   3.87523563456826*^9, 3.8752356645246763`*^9}, {3.875235707223446*^9, 
   3.8752359593024373`*^9}, {3.8752359934424667`*^9, 3.875236049310521*^9}, {
   3.875236294987774*^9, 3.8752363050000896`*^9}, {3.875236383458136*^9, 
   3.8752364461073356`*^9}, {3.8752364788558893`*^9, 
   3.8752365706212935`*^9}, {3.875236707214814*^9, 3.875236709583338*^9}, {
   3.8752367641977963`*^9, 3.875236843994796*^9}, {3.875236896011919*^9, 
   3.875237166046666*^9}, {3.875237235531037*^9, 3.875237251461103*^9}, {
   3.8752372851071124`*^9, 3.875237299220729*^9}, {3.8752373346031885`*^9, 
   3.875237339867747*^9}, {3.875237376370146*^9, 3.875237532572172*^9}, {
   3.8752376224386363`*^9, 3.875237718894716*^9}, {3.875237760346624*^9, 
   3.875237774849938*^9}, {3.8752378624652424`*^9, 3.875237867705207*^9}, {
   3.8752380915617523`*^9, 3.8752380974494762`*^9}, {3.8752381451223817`*^9, 
   3.8752382219509845`*^9}, {3.8752384878004336`*^9, 3.875238517872681*^9}, 
   3.875238560792837*^9, {3.875238604702647*^9, 3.875238617957013*^9}, {
   3.875238737909627*^9, 3.875238748027789*^9}, {3.8753544661404305`*^9, 
   3.8753546174521494`*^9}, {3.875354653831521*^9, 3.8753546885927687`*^9}, {
   3.875365200482809*^9, 3.8753653714892845`*^9}, {3.8753654565315585`*^9, 
   3.8753655107946672`*^9}, {3.8753678439224434`*^9, 3.875367848127922*^9}, 
   3.8753679568566713`*^9, 3.875766548108128*^9},
 CellLabel->"In[1]:=",ExpressionUUID->"9fd071ca-48b5-4a16-a731-add715db2899"],

Cell[BoxData[
 TagBox[
  StyleBox[
   DynamicModuleBox[{$CellContext`cAo$$ = 10, $CellContext`cEo$$ = 
    1, $CellContext`cFo$$ = 0, $CellContext`cPo$$ = 0, $CellContext`cQo$$ = 
    0, $CellContext`ka$$ = 0.006, $CellContext`kd$$ = 
    0.003, $CellContext`PingPong$$ = 1, Typeset`show$$ = True, 
    Typeset`bookmarkList$$ = {}, Typeset`bookmarkMode$$ = "Menu", 
    Typeset`animator$$, Typeset`animvar$$ = 1, Typeset`name$$ = 
    "\"untitled\"", Typeset`specs$$ = {{{
       Hold[$CellContext`cAo$$], 10, 
       "[A\!\(\*SubscriptBox[\(]\), \(0\)]\),\!\(\*FormBox[RowBox[{\" \", \
RowBox[{\"mol\", \" \", \
SuperscriptBox[RowBox[{StyleBox[\"m\",FontSlant->\"Plain\"], \" \"}], \
RowBox[{\"\[Dash]\", \"3\"}]]}]}],TraditionalForm]\)"}, 0.1, 20}, {{
       Hold[$CellContext`cEo$$], 1, 
       "[E\!\(\*SubscriptBox[\(]\), \(0\)]\),\!\(\*FormBox[RowBox[{\" \", \
RowBox[{\"mol\", \" \", \
SuperscriptBox[RowBox[{StyleBox[\"m\",FontSlant->\"Plain\"], \" \"}], \
RowBox[{\"\[Dash]\", \"3\"}]]}]}],TraditionalForm]\)"}, 0.1, 2}, {{
       Hold[$CellContext`cFo$$], 0, 
       "[F\!\(\*SubscriptBox[\(]\), \(0\)]\),\!\(\*FormBox[RowBox[{\" \", \
RowBox[{\"mol\", \" \", \
SuperscriptBox[RowBox[{StyleBox[\"m\",FontSlant->\"Plain\"], \" \"}], \
RowBox[{\"\[Dash]\", \"3\"}]]}]}],TraditionalForm]\)"}, 0, 0}, {{
       Hold[$CellContext`cPo$$], 0, 
       "[P\!\(\*SubscriptBox[\(]\), \(0\)]\),\!\(\*FormBox[RowBox[{\" \", \
RowBox[{\"mol\", \" \", \
SuperscriptBox[RowBox[{StyleBox[\"m\",FontSlant->\"Plain\"], \" \"}], \
RowBox[{\"\[Dash]\", \"3\"}]]}]}],TraditionalForm]\)"}, 0, 0}, {{
       Hold[$CellContext`cQo$$], 0, 
       "[Q\!\(\*SubscriptBox[\(]\), \(0\)]\),\!\(\*FormBox[RowBox[{\" \", \
RowBox[{\"mol\", \" \", \
SuperscriptBox[RowBox[{StyleBox[\"m\",FontSlant->\"Plain\"], \" \"}], \
RowBox[{\"\[Dash]\", \"3\"}]]}]}],TraditionalForm]\)"}, 0, 0}, {{
       Hold[$CellContext`ka$$], 0.006, 
       "\!\(\*SubscriptBox[StyleBox[\"k\",FontSlant->\"Italic\"], \"a\"]\), \
\!\(\*FormBox[RowBox[{SuperscriptBox[StyleBox[\"s\",FontSlant->\"Plain\"], \
RowBox[{\"\[Dash]\", \"1\"}]], \" \", SuperscriptBox[\"mol\", RowBox[{\"\
\[Dash]\", \"1\"}]], \" \", \
SuperscriptBox[StyleBox[\"m\",FontSlant->\"Plain\"], \
\"3\"]}],TraditionalForm]\)"}, 0.001, 0.012}, {{
       Hold[$CellContext`kd$$], 0.003, 
       "\!\(\*SubscriptBox[StyleBox[\"k\",FontSlant->\"Italic\"], \"d\"]\), \
\!\(\*FormBox[RowBox[{SuperscriptBox[StyleBox[\"s\",FontSlant->\"Plain\"], \
RowBox[{\"\[Dash]\", \"1\"}]], \" \", SuperscriptBox[\"mol\", RowBox[{\"\
\[Dash]\", \"1\"}]], \" \", \
SuperscriptBox[StyleBox[\"m\",FontSlant->\"Plain\"], \
\"3\"]}],TraditionalForm]\)"}, 0.001, 0.006}, {{
       Hold[$CellContext`PingPong$$], 1, "Panel"}, {1 -> "A"}}, {
      Hold[
       Row[{
         Column[{
           Style["REACTANTS CONCENTRATIONS:", Bold], 
           Manipulate`Place[1], 
           Manipulate`Place[2], 
           Manipulate`Place[3], 
           Manipulate`Place[4], 
           Manipulate`Place[5]}], 
         Column[{
           Style["RATE CONSTANTS:", Bold], 
           Manipulate`Place[6], 
           Manipulate`Place[7]}], 
         Manipulate`Place[8]}]], Manipulate`Dump`ThisIsNotAControl}}, 
    Typeset`size$$ = {576., {183., 189.}}, Typeset`update$$ = 0, 
    Typeset`initDone$$, Typeset`skipInitDone$$ = True}, 
    DynamicBox[Manipulate`ManipulateBoxes[
     2, StandardForm, 
      "Variables" :> {$CellContext`cAo$$ = 10, $CellContext`cEo$$ = 
        1, $CellContext`cFo$$ = 0, $CellContext`cPo$$ = 0, $CellContext`cQo$$ = 
        0, $CellContext`ka$$ = 0.006, $CellContext`kd$$ = 
        0.003, $CellContext`PingPong$$ = 1}, "ControllerVariables" :> {}, 
      "OtherVariables" :> {
       Typeset`show$$, Typeset`bookmarkList$$, Typeset`bookmarkMode$$, 
        Typeset`animator$$, Typeset`animvar$$, Typeset`name$$, 
        Typeset`specs$$, Typeset`size$$, Typeset`update$$, Typeset`initDone$$,
         Typeset`skipInitDone$$}, "Body" :> 
      Module[{$CellContext`PingPongModel1$, $CellContext`soln$, \
$CellContext`eqAns$, $CellContext`eqAn2$, $CellContext`eqAss$, \
$CellContext`eqEns$, $CellContext`eqEn2$, $CellContext`eqEss$, \
$CellContext`plot1$}, $CellContext`PingPongModel1$ = 
         Sequence[
          PlotRange -> Full, PlotLabel -> 
           Style["Ping-Pong Reaction with One Substrate Undergoing \
Disproportionation\nin the Absence of Suicide Substrate Inactivation \
(\!\(\*SubscriptBox[StyleBox[\"k\",FontSlant->\"Italic\"], \"c\"]\) \
\[RightArrow] \[Infinity] and \
\!\(\*SubscriptBox[StyleBox[\"k\",FontSlant->\"Italic\"], \"f\"]\) \
\[RightArrow] \[Infinity]):\nA + E \[LongRightArrow] P + F\nA + F \
\[LongRightArrow] Q + E", FontSize -> 14], Frame -> True, 
           FrameLabel -> {
            "Time, s", 
             "d[ ]/dt, \!\(\*FormBox[RowBox[{\"mol\", \" \", \
SuperscriptBox[RowBox[{StyleBox[\"m\",FontSlant->\"Plain\"], \" \"}], \
RowBox[{\"\[Dash]\", \"3\"}]], \
SuperscriptBox[StyleBox[\"s\",FontSlant->\"Plain\"], RowBox[{\"\[Dash]\", \"1\
\"}]]}],TraditionalForm]\)"}, LabelStyle -> {FontSize -> 14}, ImageSize -> 
           1.2 {480, 310}]; $CellContext`soln$ = 
         NDSolve[{-
             Derivative[
              1][$CellContext`cA][$CellContext`t] == $CellContext`ka$$ \
$CellContext`cA[$CellContext`t] $CellContext`cE[$CellContext`t] + \
$CellContext`kd$$ $CellContext`cA[$CellContext`t] \
$CellContext`cF[$CellContext`t], -
             Derivative[
              1][$CellContext`cE][$CellContext`t] == $CellContext`ka$$ \
$CellContext`cA[$CellContext`t] $CellContext`cE[$CellContext`t] - \
$CellContext`kd$$ $CellContext`cA[$CellContext`t] \
$CellContext`cF[$CellContext`t], 
            Derivative[
             1][$CellContext`cF][$CellContext`t] == $CellContext`ka$$ \
$CellContext`cA[$CellContext`t] $CellContext`cE[$CellContext`t] - \
$CellContext`kd$$ $CellContext`cA[$CellContext`t] \
$CellContext`cF[$CellContext`t], 
            Derivative[
             1][$CellContext`cP][$CellContext`t] == $CellContext`ka$$ \
$CellContext`cA[$CellContext`t] $CellContext`cE[$CellContext`t], 
            Derivative[
             
             1][$CellContext`cQ][$CellContext`t] == $CellContext`kd$$ \
$CellContext`cA[$CellContext`t] $CellContext`cF[$CellContext`t], \
$CellContext`cA[0] == $CellContext`cAo$$, $CellContext`cE[
             0] == $CellContext`cEo$$, $CellContext`cF[
             0] == $CellContext`cFo$$, $CellContext`cP[
             0] == $CellContext`cPo$$, $CellContext`cQ[
             0] == $CellContext`cQo$$}, {$CellContext`cA, $CellContext`cE, \
$CellContext`cF, $CellContext`cP, $CellContext`cQ}, {$CellContext`t, 0., 
            250}]; $CellContext`eqAns$ = 
         ReplaceAll[-
           Derivative[
            1][$CellContext`cA][$CellContext`t], $CellContext`soln$]; \
$CellContext`eqAn2$ = -((1/(
             4 $CellContext`ka$$ ($CellContext`ka$$ + $CellContext`kd$$))) \
($CellContext`ka$$ - $CellContext`kd$$) ($CellContext`cEo$$^2 \
$CellContext`ka$$^2 + 
             2 $CellContext`cAo$$ $CellContext`cEo$$ $CellContext`ka$$ \
(-$CellContext`ka$$ + $CellContext`kd$$) + $CellContext`cAo$$^2 \
($CellContext`ka$$ + $CellContext`kd$$)^2) 
            Sech[(1/2) 
                Sqrt[$CellContext`cEo$$^2 $CellContext`ka$$^2 + 
                  2 $CellContext`cAo$$ $CellContext`cEo$$ $CellContext`ka$$ \
(-$CellContext`ka$$ + $CellContext`kd$$) + $CellContext`cAo$$^2 \
($CellContext`ka$$ + $CellContext`kd$$)^2] $CellContext`t + 
               ArcTanh[($CellContext`cEo$$ $CellContext`ka$$ + \
$CellContext`cAo$$ ($CellContext`ka$$ + $CellContext`kd$$))/
                 Sqrt[$CellContext`cEo$$^2 $CellContext`ka$$^2 + 
                  2 $CellContext`cAo$$ $CellContext`cEo$$ $CellContext`ka$$ \
(-$CellContext`ka$$ + $CellContext`kd$$) + $CellContext`cAo$$^2 \
($CellContext`ka$$ + $CellContext`kd$$)^2]]]^2 + ($CellContext`cEo$$ \
$CellContext`ka$$ $CellContext`kd$$ ($CellContext`cEo$$^2 $CellContext`ka$$^2 + 
              2 $CellContext`cAo$$ $CellContext`cEo$$ $CellContext`ka$$ \
(-$CellContext`ka$$ + $CellContext`kd$$) + $CellContext`cAo$$^2 \
($CellContext`ka$$ + $CellContext`kd$$)^2) 
             Sech[(1/2) 
                 Sqrt[$CellContext`cEo$$^2 $CellContext`ka$$^2 + 
                   2 $CellContext`cAo$$ $CellContext`cEo$$ $CellContext`ka$$ \
(-$CellContext`ka$$ + $CellContext`kd$$) + $CellContext`cAo$$^2 \
($CellContext`ka$$ + $CellContext`kd$$)^2] $CellContext`t + 
                ArcTanh[($CellContext`cEo$$ $CellContext`ka$$ + \
$CellContext`cAo$$ ($CellContext`ka$$ + $CellContext`kd$$))/
                  Sqrt[$CellContext`cEo$$^2 $CellContext`ka$$^2 + 
                   2 $CellContext`cAo$$ $CellContext`cEo$$ $CellContext`ka$$ \
(-$CellContext`ka$$ + $CellContext`kd$$) + $CellContext`cAo$$^2 \
($CellContext`ka$$ + $CellContext`kd$$)^2]]]^2)/(($CellContext`ka$$ + \
$CellContext`kd$$) ($CellContext`cEo$$ $CellContext`ka$$ ($CellContext`ka$$ - \
$CellContext`kd$$) - $CellContext`cAo$$ ($CellContext`ka$$ + \
$CellContext`kd$$)^2 + ($CellContext`ka$$ + $CellContext`kd$$) 
              Sqrt[$CellContext`cEo$$^2 $CellContext`ka$$^2 + 
                2 $CellContext`cAo$$ $CellContext`cEo$$ $CellContext`ka$$ \
(-$CellContext`ka$$ + $CellContext`kd$$) + $CellContext`cAo$$^2 \
($CellContext`ka$$ + $CellContext`kd$$)^2] 
              Tanh[(1/2) 
                 Sqrt[$CellContext`cEo$$^2 $CellContext`ka$$^2 + 
                   2 $CellContext`cAo$$ $CellContext`cEo$$ $CellContext`ka$$ \
(-$CellContext`ka$$ + $CellContext`kd$$) + $CellContext`cAo$$^2 \
($CellContext`ka$$ + $CellContext`kd$$)^2] $CellContext`t + 
                ArcTanh[($CellContext`cEo$$ $CellContext`ka$$ + \
$CellContext`cAo$$ ($CellContext`ka$$ + $CellContext`kd$$))/
                  Sqrt[$CellContext`cEo$$^2 $CellContext`ka$$^2 + 
                   2 $CellContext`cAo$$ $CellContext`cEo$$ $CellContext`ka$$ \
(-$CellContext`ka$$ + $CellContext`kd$$) + $CellContext`cAo$$^2 \
($CellContext`ka$$ + $CellContext`kd$$)^2]]]))); $CellContext`eqAss$ = 
         2 $CellContext`cAo$$ $CellContext`cEo$$ 
          E^(-(2 $CellContext`cEo$$ $CellContext`ka$$ $CellContext`kd$$ \
$CellContext`t/($CellContext`ka$$ + $CellContext`kd$$))) $CellContext`ka$$ \
$CellContext`kd$$/($CellContext`ka$$ + $CellContext`kd$$); \
$CellContext`eqEns$ = ReplaceAll[
           Derivative[
           1][$CellContext`cE][$CellContext`t], $CellContext`soln$]; \
$CellContext`eqEn2$ = (1/(
           4 $CellContext`ka$$)) ($CellContext`cEo$$^2 $CellContext`ka$$^2 + 
           
           2 $CellContext`cAo$$ $CellContext`cEo$$ $CellContext`ka$$ \
(-$CellContext`ka$$ + $CellContext`kd$$) + $CellContext`cAo$$^2 \
($CellContext`ka$$ + $CellContext`kd$$)^2) 
          Sech[(1/2) 
              Sqrt[$CellContext`cEo$$^2 $CellContext`ka$$^2 + 
                2 $CellContext`cAo$$ $CellContext`cEo$$ $CellContext`ka$$ \
(-$CellContext`ka$$ + $CellContext`kd$$) + $CellContext`cAo$$^2 \
($CellContext`ka$$ + $CellContext`kd$$)^2] $CellContext`t + 
             ArcTanh[($CellContext`cEo$$ $CellContext`ka$$ + \
$CellContext`cAo$$ ($CellContext`ka$$ + $CellContext`kd$$))/
               Sqrt[$CellContext`cEo$$^2 $CellContext`ka$$^2 + 
                2 $CellContext`cAo$$ $CellContext`cEo$$ $CellContext`ka$$ \
(-$CellContext`ka$$ + $CellContext`kd$$) + $CellContext`cAo$$^2 \
($CellContext`ka$$ + $CellContext`kd$$)^2]]]^2; $CellContext`eqEss$ = 
         0; $CellContext`plot1$ = 
         Plot[{$CellContext`eqAns$, $CellContext`eqAn2$, $CellContext`eqAss$, \
$CellContext`eqEns$, $CellContext`eqEn2$, $CellContext`eqEss$}, \
{$CellContext`t, 0.02, 250}, 
           Evaluate[$CellContext`PingPongModel1$], PlotStyle -> {{Thick, 
              Darker[Green]}, {Thick, Blue}, {Thick, Pink}, {Thick, 
              Darker[Brown]}, {Thin, Green}, {Thick, Brown}}, Epilog -> {
             Inset[
              Style[
              "-[A]\!\(\*SubscriptBox[\('\), \(ns\)]\)", 12, Background -> 
               White], {25, 
               ReplaceAll[0.01 - Derivative[1][$CellContext`cA][25], 
                Part[$CellContext`soln$, 1]]}], 
             Inset[
              Style[
              "-[A]\!\(\*SubscriptBox[\('\), \(n = 2\)]\)", 12, Background -> 
               White], {20, 
               ReplaceAll[$CellContext`eqAn2$, $CellContext`t -> 40]}], 
             Inset[
              Style[
              "-[A]\!\(\*SubscriptBox[\('\), \(ss\)]\)", 12, Background -> 
               White], {175, 
               ReplaceAll[
               0.005 + $CellContext`eqAss$, $CellContext`t -> 175]}], 
             Inset[
              Style[
              "[E]\!\(\*SubscriptBox[\('\), \(ns\)]\)", 12, Background -> 
               White], {45, 
               ReplaceAll[-0.01 - Derivative[1][$CellContext`cE][45], 
                Part[$CellContext`soln$, 1]]}], 
             Inset[
              Style[
              "[E]\!\(\*SubscriptBox[\('\), \(n = 2\)]\)", 12, Background -> 
               White], {10, 
               ReplaceAll[
               0.004 + $CellContext`eqEn2$, $CellContext`t -> 20]}], 
             Inset[
              Style[
              "[E]\!\(\*SubscriptBox[\('\), \(ss\)]\)", 12, Background -> 
               White], {225, 
               ReplaceAll[
               0.005 + $CellContext`eqEss$, $CellContext`t -> 225]}]}]; Pane[
          Switch[$CellContext`PingPong$$, 1, 
           Show[$CellContext`plot1$]], ImageSize -> 1.2 {480, 310}]], 
      "Specifications" :> {{{$CellContext`cAo$$, 10, 
          "[A\!\(\*SubscriptBox[\(]\), \(0\)]\),\!\(\*FormBox[RowBox[{\" \", \
RowBox[{\"mol\", \" \", \
SuperscriptBox[RowBox[{StyleBox[\"m\",FontSlant->\"Plain\"], \" \"}], \
RowBox[{\"\[Dash]\", \"3\"}]]}]}],TraditionalForm]\)"}, 0.1, 20, Appearance -> 
         "Labeled", ControlPlacement -> 
         1}, {{$CellContext`cEo$$, 1, 
          "[E\!\(\*SubscriptBox[\(]\), \(0\)]\),\!\(\*FormBox[RowBox[{\" \", \
RowBox[{\"mol\", \" \", \
SuperscriptBox[RowBox[{StyleBox[\"m\",FontSlant->\"Plain\"], \" \"}], \
RowBox[{\"\[Dash]\", \"3\"}]]}]}],TraditionalForm]\)"}, 0.1, 2, Appearance -> 
         "Labeled", ControlPlacement -> 
         2}, {{$CellContext`cFo$$, 0, 
          "[F\!\(\*SubscriptBox[\(]\), \(0\)]\),\!\(\*FormBox[RowBox[{\" \", \
RowBox[{\"mol\", \" \", \
SuperscriptBox[RowBox[{StyleBox[\"m\",FontSlant->\"Plain\"], \" \"}], \
RowBox[{\"\[Dash]\", \"3\"}]]}]}],TraditionalForm]\)"}, 0, 0, Appearance -> 
         "Labeled", ControlPlacement -> 
         3}, {{$CellContext`cPo$$, 0, 
          "[P\!\(\*SubscriptBox[\(]\), \(0\)]\),\!\(\*FormBox[RowBox[{\" \", \
RowBox[{\"mol\", \" \", \
SuperscriptBox[RowBox[{StyleBox[\"m\",FontSlant->\"Plain\"], \" \"}], \
RowBox[{\"\[Dash]\", \"3\"}]]}]}],TraditionalForm]\)"}, 0, 0, Appearance -> 
         "Labeled", ControlPlacement -> 
         4}, {{$CellContext`cQo$$, 0, 
          "[Q\!\(\*SubscriptBox[\(]\), \(0\)]\),\!\(\*FormBox[RowBox[{\" \", \
RowBox[{\"mol\", \" \", \
SuperscriptBox[RowBox[{StyleBox[\"m\",FontSlant->\"Plain\"], \" \"}], \
RowBox[{\"\[Dash]\", \"3\"}]]}]}],TraditionalForm]\)"}, 0, 0, Appearance -> 
         "Labeled", ControlPlacement -> 
         5}, {{$CellContext`ka$$, 0.006, 
          "\!\(\*SubscriptBox[StyleBox[\"k\",FontSlant->\"Italic\"], \
\"a\"]\), \
\!\(\*FormBox[RowBox[{SuperscriptBox[StyleBox[\"s\",FontSlant->\"Plain\"], \
RowBox[{\"\[Dash]\", \"1\"}]], \" \", SuperscriptBox[\"mol\", RowBox[{\"\
\[Dash]\", \"1\"}]], \" \", \
SuperscriptBox[StyleBox[\"m\",FontSlant->\"Plain\"], \
\"3\"]}],TraditionalForm]\)"}, 0.001, 0.012, Appearance -> "Labeled", 
         ControlPlacement -> 
         6}, {{$CellContext`kd$$, 0.003, 
          "\!\(\*SubscriptBox[StyleBox[\"k\",FontSlant->\"Italic\"], \
\"d\"]\), \
\!\(\*FormBox[RowBox[{SuperscriptBox[StyleBox[\"s\",FontSlant->\"Plain\"], \
RowBox[{\"\[Dash]\", \"1\"}]], \" \", SuperscriptBox[\"mol\", RowBox[{\"\
\[Dash]\", \"1\"}]], \" \", \
SuperscriptBox[StyleBox[\"m\",FontSlant->\"Plain\"], \
\"3\"]}],TraditionalForm]\)"}, 0.001, 0.006, Appearance -> "Labeled", 
         ControlPlacement -> 7}, {{$CellContext`PingPong$$, 1, "Panel"}, {
         1 -> "A"}, ControlType -> Setter, ControlPlacement -> 8}, 
        Row[{
          Column[{
            Style["REACTANTS CONCENTRATIONS:", Bold], 
            Manipulate`Place[1], 
            Manipulate`Place[2], 
            Manipulate`Place[3], 
            Manipulate`Place[4], 
            Manipulate`Place[5]}], 
          Column[{
            Style["RATE CONSTANTS:", Bold], 
            Manipulate`Place[6], 
            Manipulate`Place[7]}], 
          Manipulate`Place[8]}]}, "Options" :> {}, "DefaultOptions" :> {}],
     ImageSizeCache->{770., {293., 299.}},
     SingleEvaluation->True],
    Deinitialization:>None,
    DynamicModuleValues:>{},
    SynchronousInitialization->True,
    UndoTrackedVariables:>{Typeset`show$$, Typeset`bookmarkMode$$},
    UnsavedVariables:>{Typeset`initDone$$},
    UntrackedVariables:>{Typeset`size$$}], "Manipulate",
   Deployed->True,
   StripOnInput->False],
  Manipulate`InterpretManipulate[1]]], "Output",
 CellChangeTimes->{
  3.8605844953427715`*^9, 3.8605856887477517`*^9, {3.8605857492341633`*^9, 
   3.8605857542800417`*^9}, 3.860633668069908*^9, {3.8606346018558435`*^9, 
   3.860634611587766*^9}, 3.860634914723384*^9, {3.8606350613151903`*^9, 
   3.8606350704118686`*^9}, {3.860635122742078*^9, 3.860635128759325*^9}, {
   3.8606351609907866`*^9, 3.860635164217308*^9}, {3.8606353476017513`*^9, 
   3.8606353500956645`*^9}, 3.860641610161583*^9, 3.860647794441798*^9, 
   3.8606478333232737`*^9, 3.860651885695275*^9, 3.860652179874552*^9, 
   3.8606522296753387`*^9, 3.860652270087669*^9, 3.8606636754348392`*^9, 
   3.860669547851231*^9, 3.860669754794775*^9, {3.8606698369472923`*^9, 
   3.8606698607626843`*^9}, {3.860669952537958*^9, 3.8606699692058797`*^9}, 
   3.8606701713029003`*^9, 3.8606702229626274`*^9, {3.8606702682019653`*^9, 
   3.8606702836201773`*^9}, {3.860670364679226*^9, 3.8606703807535357`*^9}, 
   3.86083929833218*^9, 3.860839336689225*^9, 3.8608393948772316`*^9, 
   3.8608395754394207`*^9, 3.860839644196808*^9, 3.860839694147865*^9, 
   3.860840440111395*^9, 3.860840542012122*^9, 3.860840660924508*^9, 
   3.8608408289018464`*^9, 3.8608409392955937`*^9, 3.860841007320944*^9, 
   3.8608410751326876`*^9, 3.860841111617941*^9, 3.8608411558705187`*^9, 
   3.8608413645267773`*^9, 3.8608416070482254`*^9, 3.8608416462999363`*^9, 
   3.860842224704837*^9, 3.8608499745516257`*^9, 3.8611871879274163`*^9, 
   3.8611872215455503`*^9, 3.861187302554028*^9, {3.861187978962521*^9, 
   3.861187981834504*^9}, {3.8611894990851173`*^9, 3.861189503735367*^9}, {
   3.8611903046208534`*^9, 3.8611903098846865`*^9}, 3.8611905771447525`*^9, 
   3.8623911466562977`*^9, 3.8623953374354334`*^9, 3.8623954181395726`*^9, 
   3.8623954706076083`*^9, 3.8623955170730724`*^9, 3.875235219618533*^9, 
   3.8752353226146393`*^9, 3.8752354704407434`*^9, 3.875235538891796*^9, 
   3.8752360575777035`*^9, 3.8752363096997786`*^9, 3.8752365861867185`*^9, 
   3.8752367241164885`*^9, 3.875236850482218*^9, 3.875236904184232*^9, 
   3.8752371783184166`*^9, {3.8752372622379303`*^9, 3.8752373018601832`*^9}, 
   3.8752373430316396`*^9, {3.87523740333832*^9, 3.8752374536543074`*^9}, 
   3.8752374891396136`*^9, {3.8752375204627495`*^9, 3.875237535738451*^9}, 
   3.875237778899183*^9, 3.8752378735502996`*^9, 3.875238101850604*^9, 
   3.8752382251552196`*^9, {3.875238497568685*^9, 3.8752385213756595`*^9}, 
   3.875238565829451*^9, 3.8752386351994*^9, 3.8752387579894505`*^9, 
   3.8753546199282055`*^9, 3.875354693962929*^9, 3.87535506750114*^9, {
   3.87536529301501*^9, 3.8753653199650307`*^9}, 3.8753653757910795`*^9, 
   3.875365514446227*^9, 3.8753661463007483`*^9, 3.875366246117177*^9, 
   3.8757665515703897`*^9, 3.8765551056581593`*^9, 3.8765642173042164`*^9},
 CellLabel->"Out[1]=",ExpressionUUID->"f270b3e9-45f3-4528-a410-20815a79fbaa"]
}, Open  ]]
}, Open  ]]
}, Open  ]]
}, Open  ]]
},
WindowSize->{993, 905},
WindowMargins->{{Automatic, 50}, {Automatic, 31}},
FrontEndVersion->"12.2 for Microsoft Windows (64-bit) (December 12, 2020)",
StyleDefinitions->"Default.nb",
ExpressionUUID->"e8793c7e-0532-461b-8cbc-fde9293f8a62"
]
(* End of Notebook Content *)

(* Internal cache information *)
(*CellTagsOutline
CellTagsIndex->{}
*)
(*CellTagsIndex
CellTagsIndex->{}
*)
(*NotebookFileOutline
Notebook[{
Cell[CellGroupData[{
Cell[580, 22, 242, 5, 105, "Section",ExpressionUUID->"2eca4cf7-9db6-4441-9ec8-bcec228c7aea"],
Cell[CellGroupData[{
Cell[847, 31, 19788, 290, 147, "Subsection",ExpressionUUID->"338e51c4-725c-46f0-ab96-bcba02090773"],
Cell[CellGroupData[{
Cell[20660, 325, 783, 14, 119, "Subsubsection",ExpressionUUID->"56765b94-8760-4926-8073-5fe35aabd730"],
Cell[21446, 341, 168, 3, 34, "Text",ExpressionUUID->"8378b1e8-85fd-4885-a4fa-5e76bcb91c2f"],
Cell[CellGroupData[{
Cell[21639, 348, 1305, 40, 67, "Input",ExpressionUUID->"7ada4f30-3f66-4fd2-a483-3865dabbcfd6"],
Cell[22947, 390, 587, 16, 32, "Output",ExpressionUUID->"ae81d6e9-3c94-4a85-9f5c-9970d788b3b5"],
Cell[23537, 408, 605, 17, 32, "Output",ExpressionUUID->"b5083463-06c6-48b2-a1fc-511992992a4f"],
Cell[24145, 427, 403, 10, 32, "Output",ExpressionUUID->"871c85b1-4f63-42a7-b7ef-462e21ef5a39"]
}, Open  ]],
Cell[24563, 440, 286, 7, 56, "Text",ExpressionUUID->"a46a8a52-d088-4ea0-9903-0cac08d89e78"],
Cell[CellGroupData[{
Cell[24874, 451, 1222, 36, 28, "Input",ExpressionUUID->"7523eccf-e649-4f19-8452-5902cea8a0be"],
Cell[26099, 489, 782, 25, 53, "Output",ExpressionUUID->"cc9da830-b0ae-4ac6-b25a-155203e4d806"]
}, Open  ]],
Cell[CellGroupData[{
Cell[26918, 519, 1657, 42, 79, "Input",ExpressionUUID->"1ea71ac1-7bdd-4cbe-a7a4-a4c17d5d3ff1"],
Cell[28578, 563, 1371, 37, 54, "Output",ExpressionUUID->"6400b50f-9689-4259-8d36-820dfec592e7"]
}, Open  ]],
Cell[CellGroupData[{
Cell[29986, 605, 1765, 51, 80, "Input",ExpressionUUID->"6b994a7a-de0f-46de-8af5-38310916fd77"],
Cell[31754, 658, 1733, 49, 77, "Output",ExpressionUUID->"7231c765-93bf-4569-a2ba-7fe7583116d2"]
}, Open  ]],
Cell[33502, 710, 169, 3, 34, "Text",ExpressionUUID->"14b9b60f-69db-470c-9dfd-9e270ae521e4"],
Cell[CellGroupData[{
Cell[33696, 717, 1959, 55, 132, "Input",ExpressionUUID->"5886b84e-a800-4a8a-96b8-c7935db4eb43"],
Cell[35658, 774, 1299, 34, 32, "Output",ExpressionUUID->"9d566570-b18b-47e8-b4dd-69b325cdf487"]
}, Open  ]],
Cell[CellGroupData[{
Cell[36994, 813, 1880, 54, 132, "Input",ExpressionUUID->"fb6de867-1b28-4192-885f-66a9d12b43b1"],
Cell[38877, 869, 1399, 39, 32, "Output",ExpressionUUID->"cac059ba-f086-4ef7-badf-e1b3e020fbe8"]
}, Open  ]],
Cell[CellGroupData[{
Cell[40313, 913, 1114, 31, 28, "Input",ExpressionUUID->"17c13035-6a0b-48c7-8b28-955d25a815a3"],
Cell[41430, 946, 1147, 33, 58, "Output",ExpressionUUID->"77e43691-1c7e-4e9e-8339-50c3d93601c7"]
}, Open  ]],
Cell[CellGroupData[{
Cell[42614, 984, 2507, 71, 97, "Input",ExpressionUUID->"d8267622-edd8-4319-9c33-ffc4c64eea80"],
Cell[45124, 1057, 2236, 66, 77, "Output",ExpressionUUID->"03e4a1cd-0972-4cae-8071-8fcf6f4e46e9"]
}, Open  ]],
Cell[CellGroupData[{
Cell[47397, 1128, 1631, 44, 55, "Input",ExpressionUUID->"0a523133-bf80-4a1b-9b7a-edeb7bbe82c8"],
Cell[49031, 1174, 526, 12, 23, "Message",ExpressionUUID->"e259fb4b-ba19-4d98-845f-d904e6b7a11a"],
Cell[49560, 1188, 2629, 73, 104, "Output",ExpressionUUID->"0811fb60-b152-4c33-a75c-d7296996a517"]
}, Open  ]],
Cell[CellGroupData[{
Cell[52226, 1266, 4010, 111, 207, "Input",ExpressionUUID->"d29f3b91-4570-4bbb-b671-24d7f4432272"],
Cell[56239, 1379, 5860, 159, 277, "Output",ExpressionUUID->"7619c430-30e5-417e-a464-7f901c7484c1"]
}, Open  ]],
Cell[CellGroupData[{
Cell[62136, 1543, 1191, 35, 54, "Input",ExpressionUUID->"3b3f5cbd-c709-4327-95a8-5ab8405e4350"],
Cell[63330, 1580, 1014, 32, 56, "Output",ExpressionUUID->"6aee3e16-44c0-4e5b-ad3a-c8d1e0eeb482"]
}, Open  ]],
Cell[CellGroupData[{
Cell[64381, 1617, 2475, 70, 106, "Input",ExpressionUUID->"6007af9e-a0ef-4895-a4b8-194b194a20f3"],
Cell[66859, 1689, 2554, 80, 82, "Output",ExpressionUUID->"a8167776-4521-4e0a-83d9-fff9739f3ff1"]
}, Open  ]],
Cell[CellGroupData[{
Cell[69450, 1774, 2676, 73, 252, "Input",ExpressionUUID->"914ab13f-ac54-4215-90e8-9d87cedd9089"],
Cell[72129, 1849, 2209, 66, 97, "Output",ExpressionUUID->"b4ebd868-06df-421e-881b-8daccf0aeb25"]
}, Open  ]],
Cell[CellGroupData[{
Cell[74375, 1920, 6242, 162, 515, "Input",ExpressionUUID->"9b55c00f-7a80-48d4-bd90-367335b76a0c"],
Cell[80620, 2084, 7394, 206, 328, "Output",ExpressionUUID->"5745c710-d1a2-4f9f-a569-01abedbc7461"]
}, Open  ]],
Cell[88029, 2293, 224, 4, 34, "Text",ExpressionUUID->"fe1fa69e-3a37-45cb-b0bc-a3302c51868c"],
Cell[CellGroupData[{
Cell[88278, 2301, 1241, 40, 67, "Input",ExpressionUUID->"b52d70e4-1493-4451-a6af-abb4017e935f"],
Cell[89522, 2343, 567, 17, 32, "Output",ExpressionUUID->"6d30f4c5-7ab8-416e-9094-1d1102432fa9"],
Cell[90092, 2362, 585, 18, 32, "Output",ExpressionUUID->"0fefe88f-5a2d-4428-9269-6021d6f90864"],
Cell[90680, 2382, 385, 11, 32, "Output",ExpressionUUID->"289dd948-d90c-4d72-99b5-5361f0ec4cd9"]
}, Open  ]],
Cell[CellGroupData[{
Cell[91102, 2398, 902, 26, 28, "Input",ExpressionUUID->"22a740ca-3879-4290-aeeb-22a6b6e288b3"],
Cell[92007, 2426, 392, 11, 50, "Output",ExpressionUUID->"7dbba73d-5713-4267-ac07-30425365f913"]
}, Open  ]],
Cell[CellGroupData[{
Cell[92436, 2442, 1213, 34, 46, "Input",ExpressionUUID->"c73cac85-d9e9-459e-8237-890d55828a6f"],
Cell[93652, 2478, 714, 19, 62, "Output",ExpressionUUID->"c3f48685-08a6-412f-a6c0-a01d6609652a"]
}, Open  ]],
Cell[CellGroupData[{
Cell[94403, 2502, 44720, 881, 1721, "Input",ExpressionUUID->"9fd071ca-48b5-4a16-a731-add715db2899"],
Cell[139126, 3385, 19891, 361, 632, "Output",ExpressionUUID->"f270b3e9-45f3-4528-a410-20815a79fbaa"]
}, Open  ]]
}, Open  ]]
}, Open  ]]
}, Open  ]]
}
]
*)
