# Supplementary material
Source: MDPI journal article supplement (https://www.mdpi.com/2227-7390/10/22/4240)
Supplement: s1 [file s1 › Figure 6AC_Mathematics-1964681.nb]

(* Content-type: application/vnd.wolfram.mathematica *)

(*** Wolfram Notebook File ***)
(* http://www.wolfram.com/nb *)

(* CreatedBy='Mathematica 12.2' *)

(*CacheID: 234*)
(* Internal cache information:
NotebookFileLineBreakTest
NotebookFileLineBreakTest
NotebookDataPosition[       158,          7]
NotebookDataLength[    152942,       3366]
NotebookOptionsPosition[    149738,       3303]
NotebookOutlinePosition[    150141,       3319]
CellTagsIndexPosition[    150098,       3316]
WindowFrame->Normal*)

(* Beginning of Notebook Content *)
Notebook[{

Cell[CellGroupData[{
Cell["\<\
Ping-Pong Reaction with One Substrate Undergoing Disproportionation
in the Presence of Suicide Substrate Inactivation\
\>", "Section",
 CellChangeTimes->{
  3.8753669257107997`*^9, {3.8753669685163937`*^9, 
   3.875367018214018*^9}},ExpressionUUID->"b08373cd-4c62-48f4-8269-\
92751363fe0b"],

Cell[CellGroupData[{

Cell[TextData[{
 StyleBox[Cell[BoxData[
  FormBox[GridBox[{
     {
      RowBox[{
       RowBox[{
       Cell["A", "Text",ExpressionUUID->
         "9c0b7230-e9a3-4439-95b5-0a08040464de"], "+", Cell[
        "E\[NonBreakingSpace]", "Text",ExpressionUUID->
         "481c998d-dd0a-4dfc-9c33-ba605d6ed46b"]}], 
       OverscriptBox["\[RightArrow]", 
        SubscriptBox["k", "a"]], 
       RowBox[{
       Cell["F", "Text",ExpressionUUID->
         "1ce19159-b11c-4dea-b573-02d7c938a380"], "+", Cell[
        "P", "Text",ExpressionUUID->
         "caf963eb-46f8-4792-9d96-e73e156d577d"]}]}]},
     {
      RowBox[{
       RowBox[{
       Cell["A", "Text",ExpressionUUID->
         "2c9f97bc-6c7e-4de2-82a4-88fe97ab797c"], "+", Cell[
        "F\[NonBreakingSpace]", "Text",ExpressionUUID->
         "7170637c-be98-4590-8040-f38b7485562d"]}], 
       OverscriptBox["\[RightArrow]", 
        SubscriptBox["k", "d"]], 
       RowBox[{
       Cell["E", "Text",ExpressionUUID->
         "9246d58f-c6ba-438d-ae0a-20d38eb33dc0"], "+", Cell[
        "Q", "Text",ExpressionUUID->
         "18163eb1-f9e8-441b-b44f-df5bfa666e5d"]}]}]}
    },
    GridBoxAlignment->{"Columns" -> {{Left}}, "Rows" -> {{Baseline}}}], 
   TraditionalForm]], "Subsection",ExpressionUUID->
  "7346a19f-a4be-460c-b855-896e889c8b2b"], "Subsection"],
 StyleBox["\n", "Subsection"],
 Cell[BoxData[
  FormBox[
   RowBox[{
    RowBox[{
    Cell["A", "Text",ExpressionUUID->"3d7492c1-c7fd-4dba-a4e3-63591c87dfbe"], 
     "+", Cell[
     "E \[NonBreakingSpace]", "Text",ExpressionUUID->
      "bf3ecba9-cbe7-40f4-8014-cd2eea62398c"]}], 
    OverscriptBox["\[RightArrow]", 
     SubscriptBox["k", "i"]], 
    StyleBox["I",
     FontSlant->"Plain"]}], TraditionalForm]],ExpressionUUID->
  "0956ce54-9b28-463f-866c-90e3753da0d9"],
 StyleBox["\n\n", "Subsection"],
 StyleBox[Cell[BoxData[
  RowBox[{
   RowBox[{
    SubscriptBox[
     StyleBox["k",
      FontSlant->"Italic"], "c"], " ", "\[RightArrow]", " ", "\[Infinity]"}], 
   ",", 
   RowBox[{
    SubscriptBox[
     StyleBox["k",
      FontSlant->"Italic"], "f"], " ", "\[RightArrow]", " ", 
    "\[Infinity]"}]}]], "Subsection",
  CellChangeTimes->{{3.841749732856798*^9, 3.841749906918338*^9}, {
    3.841750053788534*^9, 3.8417500568715334`*^9}, {3.8418036925935926`*^9, 
    3.841803706752474*^9}, {3.8418037607203846`*^9, 3.841803774188929*^9}, {
    3.8418038073567395`*^9, 3.8418038499275484`*^9}, 3.841803904405038*^9, {
    3.8418053228201857`*^9, 3.841805323938447*^9}, {3.841805430221315*^9, 
    3.841805430784861*^9}, {3.8418056712220964`*^9, 3.8418056725014286`*^9}, {
    3.841836424378595*^9, 3.8418364269817724`*^9}, {3.8418867914336452`*^9, 
    3.841886853106645*^9}, {3.841886891238326*^9, 3.8418869414298725`*^9}, {
    3.8418871779836135`*^9, 3.8418871986816463`*^9}, {3.8418872411875305`*^9, 
    3.841887251013095*^9}, {3.84188731368587*^9, 3.8418873297914915`*^9}, {
    3.8418874752412233`*^9, 3.8418874765690117`*^9}, 3.8418875913857713`*^9, {
    3.841887944680502*^9, 3.841888206986114*^9}, {3.8418882799062786`*^9, 
    3.8418882862487326`*^9}, {3.8418883519361906`*^9, 3.841888407829341*^9}, {
    3.8418884538187127`*^9, 3.8418884964492006`*^9}, {3.8420104553380365`*^9, 
    3.842010456105392*^9}, {3.842010501475397*^9, 3.8420105017222424`*^9}, 
    3.8420105393949304`*^9, {3.8466571293324575`*^9, 
    3.8466571443435946`*^9}, {3.846657370778998*^9, 3.8466574869332204`*^9}, {
    3.846657601401836*^9, 3.846657689884245*^9}, 3.846658199217289*^9, {
    3.8466582422685738`*^9, 3.8466583553051624`*^9}, {3.8466583890306325`*^9, 
    3.846658445869364*^9}, {3.8466587017050686`*^9, 3.846658727875573*^9}, {
    3.8466589044445233`*^9, 3.846658923562812*^9}, {3.8466590107398157`*^9, 
    3.846659080311597*^9}, {3.846659127976855*^9, 3.846659128101828*^9}, {
    3.8466591912168427`*^9, 3.8466592481487646`*^9}, {3.8466594766550484`*^9, 
    3.846659533599231*^9}, {3.84665958437168*^9, 3.846659863675767*^9}, {
    3.8466598938799286`*^9, 3.846660059514933*^9}, {3.846669158921476*^9, 
    3.846669160540101*^9}, {3.846669210254387*^9, 3.8466695226397595`*^9}, {
    3.8466696739300594`*^9, 3.846669700555784*^9}, {3.846669733667065*^9, 
    3.846669830943153*^9}, {3.846669942941931*^9, 3.846669970183852*^9}, {
    3.8466700023530407`*^9, 3.846670003337158*^9}, {3.846670285534099*^9, 
    3.8466702962801914`*^9}, 3.846670457513308*^9, {3.846670500562671*^9, 
    3.8466705275347214`*^9}, {3.8466707719949465`*^9, 
    3.8466708730671043`*^9}, {3.8466709531558485`*^9, 
    3.8466710349452095`*^9}, {3.8466710720817604`*^9, 3.84667111103518*^9}, {
    3.8466711412342763`*^9, 3.8466712050839252`*^9}, {3.846671240711611*^9, 
    3.846671300266326*^9}, {3.846671342372938*^9, 3.8466714524283266`*^9}, {
    3.8466715047371726`*^9, 3.846671713659568*^9}, {3.8466722931171083`*^9, 
    3.8466723395722675`*^9}, 3.846672384048112*^9, {3.846739969188094*^9, 
    3.846739972171768*^9}, 3.846745658041407*^9, 3.846746398433676*^9, {
    3.846764496223112*^9, 3.846764552952351*^9}, {3.8472766347056165`*^9, 
    3.847276669849394*^9}, {3.847276713138187*^9, 3.847276721757236*^9}, {
    3.8472770823160067`*^9, 3.8472771436873293`*^9}, {3.847277313528089*^9, 
    3.8472773203345337`*^9}, {3.847277416301323*^9, 3.8472774310812693`*^9}, {
    3.8472774750157623`*^9, 3.847277479177511*^9}, {3.8472775316318893`*^9, 
    3.8472775758940177`*^9}, {3.8472776543078303`*^9, 
    3.8472776815826125`*^9}, {3.8472820829125304`*^9, 3.847282101713642*^9}, {
    3.847282202644628*^9, 3.8472822104353604`*^9}, {3.847282267459462*^9, 
    3.847282310564173*^9}, {3.8472823596584167`*^9, 3.847282370012159*^9}, {
    3.84728242923578*^9, 3.847282460379707*^9}, 3.8472825661218014`*^9, {
    3.847282602620706*^9, 3.847282614768936*^9}, {3.847335149022919*^9, 
    3.8473351951998057`*^9}, {3.847335255588388*^9, 3.8473352622853622`*^9}, 
    3.847335299620603*^9, {3.847335579443143*^9, 3.847335608350524*^9}, {
    3.8473356424322844`*^9, 3.84733571358677*^9}, {3.8473357501219473`*^9, 
    3.8473359066759663`*^9}, {3.847336046522848*^9, 3.847336053503533*^9}, {
    3.8473361964772964`*^9, 3.847336200021795*^9}, {3.8473362736531377`*^9, 
    3.847336288747509*^9}, {3.8473481034081535`*^9, 3.8473481111240797`*^9}, {
    3.848382018287554*^9, 3.8483820505924406`*^9}, {3.8483820856130686`*^9, 
    3.8483821106696844`*^9}, {3.848382145520816*^9, 3.8483821466143074`*^9}, 
    3.848382193853175*^9, {3.8483823158244123`*^9, 3.8483823864694166`*^9}, {
    3.8483824661294794`*^9, 3.848382489858067*^9}, {3.848382561091242*^9, 
    3.848382564293646*^9}, {3.851685314669648*^9, 3.8516853345712028`*^9}, {
    3.851685467649209*^9, 3.8516855020422287`*^9}, {3.8516869238465166`*^9, 
    3.85168695982136*^9}, {3.8516872104938073`*^9, 3.8516872120405083`*^9}, {
    3.851687248756606*^9, 3.8516872707514334`*^9}, {3.8516878641505013`*^9, 
    3.8516880498282366`*^9}, {3.8516882835180893`*^9, 3.851688291032139*^9}, {
    3.851688381385642*^9, 3.85168840174336*^9}, {3.851688516903908*^9, 
    3.8516885512922974`*^9}, 3.8516888509872847`*^9, {3.8516890734305644`*^9, 
    3.8516890753207664`*^9}, 3.8517484648140383`*^9, {3.8517485281857347`*^9, 
    3.8517485619332514`*^9}, 3.8517486580512123`*^9, {3.8517513588686676`*^9, 
    3.8517514073309526`*^9}, {3.851751441541626*^9, 3.851751533068022*^9}, {
    3.851751605597808*^9, 3.851751650071472*^9}, {3.851751914649771*^9, 
    3.8517519306772113`*^9}, {3.8517539209566264`*^9, 3.851753921518944*^9}, {
    3.8517540049156313`*^9, 3.851754040623369*^9}, {3.8517541342577877`*^9, 
    3.851754134913883*^9}, {3.851755580791625*^9, 3.851755632282189*^9}, {
    3.85175566732077*^9, 3.85175576897163*^9}, {3.8517559092694125`*^9, 
    3.8517560125106993`*^9}, {3.851756148759842*^9, 3.8517561999442496`*^9}, {
    3.8517562786755133`*^9, 3.85175632121237*^9}, {3.85175638008928*^9, 
    3.8517564265781727`*^9}, {3.851756473982087*^9, 3.851756555509982*^9}, {
    3.8517565928446894`*^9, 3.851756625102707*^9}, {3.8517567124475203`*^9, 
    3.8517567340361834`*^9}, {3.851756821984413*^9, 3.8517568226248865`*^9}, {
    3.851756969730645*^9, 3.851757070910103*^9}, {3.851757110244399*^9, 
    3.851757111275406*^9}, {3.851757569353534*^9, 3.851757600992166*^9}, {
    3.851757676019738*^9, 3.85175767789157*^9}, {3.8517588302002554`*^9, 
    3.8517588878013997`*^9}, {3.851759072157569*^9, 3.85175907351406*^9}, {
    3.8517591552706633`*^9, 3.851759156705036*^9}, {3.851773137829807*^9, 
    3.851773169748623*^9}, {3.851773221229227*^9, 3.851773236357489*^9}, {
    3.8517733236279716`*^9, 3.8517733853129454`*^9}, {3.8517736188601284`*^9, 
    3.8517736258686404`*^9}, {3.8517737335668736`*^9, 3.851773738860039*^9}, 
    3.85177424731844*^9, {3.8517744746512675`*^9, 3.8517745447581444`*^9}, {
    3.851774585179755*^9, 3.851774618308499*^9}, {3.8517746807891307`*^9, 
    3.851774793080097*^9}, {3.851774873581607*^9, 3.8517749417219224`*^9}, {
    3.8517749856665754`*^9, 3.851775069507588*^9}, {3.8517774656545877`*^9, 
    3.851777466404437*^9}, {3.851777829092969*^9, 3.851777904166011*^9}, {
    3.8517781493109093`*^9, 3.8517782678252363`*^9}, {3.8517783179878016`*^9, 
    3.8517783821043415`*^9}, {3.85177841694917*^9, 3.851778454471308*^9}, {
    3.8517786093640203`*^9, 3.851778649402458*^9}, {3.851778683091739*^9, 
    3.851778693952546*^9}, 3.8517787333336506`*^9, {3.851778860073439*^9, 
    3.8517789122839394`*^9}, 3.851778952979082*^9, {3.8517791570067186`*^9, 
    3.8517791968098183`*^9}, {3.8517792312940693`*^9, 3.851779232715418*^9}, {
    3.8517792716194496`*^9, 3.851779379340855*^9}, {3.851779414021425*^9, 
    3.851779437226183*^9}, {3.8517794772943573`*^9, 3.8517795285549793`*^9}, 
    3.851779599409135*^9, {3.851947825131568*^9, 3.8519478397101264`*^9}, {
    3.8519479427752776`*^9, 3.851948080565038*^9}, {3.85194815725144*^9, 
    3.8519482112936525`*^9}, {3.8519482513071823`*^9, 3.851948300685818*^9}, {
    3.8519483467633505`*^9, 3.851948421926777*^9}, {3.854599917707138*^9, 
    3.854600013569354*^9}, {3.854712805139721*^9, 3.854712813811827*^9}, 
    3.85471512724292*^9, 3.8547154313136697`*^9, 3.854715541926668*^9, 
    3.854715944297141*^9, 3.8547754142715487`*^9, {3.8547755264962225`*^9, 
    3.8547755281675076`*^9}, {3.8547757270426426`*^9, 3.854775759334991*^9}, {
    3.8547757926492653`*^9, 3.85477579305542*^9}, {3.8547768647573757`*^9, 
    3.854776888796584*^9}, {3.8547769897774916`*^9, 3.854777019479389*^9}, {
    3.8547782128710985`*^9, 3.854778230252418*^9}, {3.8551982248697605`*^9, 
    3.855198277906287*^9}, {3.8551983360656457`*^9, 3.855198378165367*^9}, {
    3.855198503562776*^9, 3.855198531540599*^9}, {3.8551986228954463`*^9, 
    3.855198632533785*^9}, {3.8551987815217276`*^9, 3.855198791160095*^9}, {
    3.8552109863220525`*^9, 3.855210987618623*^9}, 3.855214762411118*^9, {
    3.856011846562994*^9, 3.856011846734826*^9}, 3.8560878091302457`*^9, 
    3.856087843090822*^9, {3.8560879184455433`*^9, 3.856087963059487*^9}, {
    3.8560880649683847`*^9, 3.856088202612194*^9}, 3.856088353238575*^9, {
    3.8560883909865675`*^9, 3.8560884115561733`*^9}, {3.8560884566794767`*^9, 
    3.856088466752247*^9}, {3.8560892251039495`*^9, 3.856089228351763*^9}, 
    3.8560897910955305`*^9, 3.856090309417139*^9, {3.8560904253453856`*^9, 
    3.8560904291870055`*^9}, {3.856091411499737*^9, 3.8560914171155396`*^9}, 
    3.8560914677276793`*^9, {3.8560929829811707`*^9, 
    3.8560930025763435`*^9}, {3.856093034916766*^9, 3.856093040136408*^9}, 
    3.8560936656415873`*^9, {3.8560946746845627`*^9, 3.8560947386523623`*^9}, 
    3.8560948723914704`*^9, {3.8560949180506277`*^9, 
    3.8560949209652853`*^9}, {3.8560949813293114`*^9, 
    3.8560949895195255`*^9}, {3.856096770884041*^9, 3.8560967982143965`*^9}, {
    3.8562662119601536`*^9, 3.8562662387117453`*^9}, {3.8562662738353577`*^9, 
    3.85626634798162*^9}, {3.8562664068280306`*^9, 3.8562664493400946`*^9}, {
    3.856266491656769*^9, 3.8562665542320075`*^9}, {3.8562666093858414`*^9, 
    3.856266616914109*^9}, 3.8562666503855114`*^9, 3.856266731222801*^9, {
    3.8562667623716664`*^9, 3.856266763340187*^9}, {3.856266817889781*^9, 
    3.8562669903836803`*^9}, {3.856267028970646*^9, 3.8562674280048995`*^9}, {
    3.856267489320221*^9, 3.8562675036762*^9}, {3.8562675747686973`*^9, 
    3.85626772736058*^9}, {3.856268275993417*^9, 3.856268308782513*^9}, {
    3.8562683880938034`*^9, 3.8562684345515585`*^9}, {3.856268464669392*^9, 
    3.856268483055673*^9}, {3.856268600184104*^9, 3.8562686093384027`*^9}, {
    3.8562686627942486`*^9, 3.8562686713562837`*^9}, {3.856268715189642*^9, 
    3.85626872318774*^9}, {3.8562688858849354`*^9, 3.8562689033964076`*^9}, {
    3.8562689706460557`*^9, 3.8562689783161087`*^9}, {3.8562690119511585`*^9, 
    3.856269027838032*^9}, {3.8562692047059155`*^9, 3.8562692060962067`*^9}, {
    3.8562692889079857`*^9, 3.8562692982027073`*^9}, {3.856269339677191*^9, 
    3.856269382573267*^9}, {3.856269415565442*^9, 3.856269435654676*^9}, {
    3.8562694723563094`*^9, 3.856269557617446*^9}, {3.856269592702757*^9, 
    3.8562695966393237`*^9}, {3.8562697389401054`*^9, 3.856269757199979*^9}, {
    3.8562698668960752`*^9, 3.8562698804551315`*^9}, 3.8562699452694855`*^9, {
    3.8562700055975056`*^9, 3.856270024858776*^9}, 3.856270062059145*^9, {
    3.8562701015654116`*^9, 3.856270107938883*^9}, {3.8562708100480924`*^9, 
    3.856270885842801*^9}, 3.856270961293467*^9, {3.8562711191233764`*^9, 
    3.8562711470871487`*^9}, {3.8562711940291367`*^9, 
    3.8562712004963613`*^9}, {3.8562712551100063`*^9, 
    3.8562712731059637`*^9}, {3.856271326739816*^9, 3.856271327005192*^9}, 
    3.8562715582179365`*^9, {3.85635050737883*^9, 3.8563505384237394`*^9}, {
    3.8563507814405966`*^9, 3.8563508153988123`*^9}, {3.856403365288825*^9, 
    3.8564033725059032`*^9}, 3.8564034328061533`*^9, {3.856403677833009*^9, 
    3.8564036865653663`*^9}, 3.856403890866742*^9, {3.8564041266115713`*^9, 
    3.8564041422014694`*^9}, 3.8564041731184883`*^9, {3.856416050425877*^9, 
    3.8564160637664623`*^9}, {3.856416280935495*^9, 3.856416287355866*^9}, {
    3.856416959202245*^9, 3.8564169628422403`*^9}, {3.8564170881878357`*^9, 
    3.8564170929365063`*^9}, {3.8564211371406746`*^9, 
    3.8564211381260867`*^9}, {3.8584271961336045`*^9, 3.858427205893742*^9}, 
    3.858429013129891*^9, {3.8584294949592237`*^9, 3.8584294959118695`*^9}, {
    3.858429584832994*^9, 3.8584295943151016`*^9}, 3.8584301369616175`*^9, {
    3.858430339552408*^9, 3.85843034217698*^9}, 3.8584315237909*^9, {
    3.8584315538161883`*^9, 3.858431583077695*^9}, {3.8586481763032894`*^9, 
    3.8586482132321167`*^9}, {3.8586482662196245`*^9, 
    3.8586482788262625`*^9}, {3.8586520958274355`*^9, 
    3.8586520974052067`*^9}, {3.8586521767410717`*^9, 
    3.8586522948195953`*^9}, {3.858652332447443*^9, 3.8586523344626207`*^9}, {
    3.8586524266083574`*^9, 3.858652428795418*^9}, {3.858652466641944*^9, 
    3.8586524687664547`*^9}, 3.858652635278686*^9, 3.8586526698572216`*^9, {
    3.8586527015549583`*^9, 3.8586527915947876`*^9}, {3.8586528245985355`*^9, 
    3.858652908923914*^9}, {3.8586530994435596`*^9, 3.858653197242655*^9}, {
    3.8586532352464437`*^9, 3.8586532454784384`*^9}, {3.8586534506699677`*^9, 
    3.8586535085142584`*^9}, {3.858653623629122*^9, 3.8586536312142105`*^9}, {
    3.8586545877607684`*^9, 3.858654593790846*^9}, {3.858654662936039*^9, 
    3.8586546703699636`*^9}, {3.8586551608986635`*^9, 3.858655207035569*^9}, {
    3.8586552560515184`*^9, 3.858655256691988*^9}, {3.858655294051999*^9, 
    3.8586552945676804`*^9}, {3.8586553251959395`*^9, 3.858655329055599*^9}, {
    3.8586554034905972`*^9, 3.8586554039594183`*^9}, {3.8586562167494545`*^9, 
    3.8586562419891367`*^9}, {3.858656345853464*^9, 3.8586563472281446`*^9}, {
    3.85865642554783*^9, 3.8586564274223795`*^9}, 3.858656609260376*^9, {
    3.8586567791800585`*^9, 3.8586567938415623`*^9}, {3.858656843604476*^9, 
    3.8586568448541813`*^9}, 3.858657264350212*^9, 3.8586578643727827`*^9, {
    3.8586603501435423`*^9, 3.8586603610776873`*^9}, {3.858665299710614*^9, 
    3.858665304568842*^9}, {3.85866660066634*^9, 3.858666631320428*^9}, 
    3.8588324708255205`*^9, 3.858834680023713*^9, {3.858834816319806*^9, 
    3.8588348245678115`*^9}, {3.859371068746986*^9, 3.859371071760897*^9}, {
    3.859371119092376*^9, 3.859371120263667*^9}, {3.86058476409734*^9, 
    3.860584765722186*^9}, {3.860584841536561*^9, 3.8605848473633127`*^9}, {
    3.860584881556029*^9, 3.8605849345190516`*^9}, {3.8605849810705805`*^9, 
    3.860585005457756*^9}, {3.8605850393795395`*^9, 3.8605850418789215`*^9}, {
    3.8605851656060953`*^9, 3.860585194270255*^9}, 3.86063381286031*^9, {
    3.860633853041381*^9, 3.8606338605381393`*^9}, {3.86063401668987*^9, 
    3.8606340194591556`*^9}, {3.8606344973969564`*^9, 
    3.8606345323857527`*^9}, {3.8606351162938786`*^9, 
    3.8606351169534793`*^9}, {3.860635337183052*^9, 3.860635337760549*^9}, {
    3.8606415668765078`*^9, 3.860641595432556*^9}, {3.8606478264186707`*^9, 
    3.860647827262169*^9}, {3.860652123064255*^9, 3.8606521235797577`*^9}, {
    3.860652155786443*^9, 3.8606521736104174`*^9}, 3.8606522667603283`*^9, {
    3.8606696247237062`*^9, 3.8606696733079042`*^9}, {3.860669722427417*^9, 
    3.860669749858634*^9}, {3.8606698523428307`*^9, 3.8606698539051495`*^9}, {
    3.860670121437567*^9, 3.860670162149023*^9}, {3.860670218651143*^9, 
    3.8606702191509986`*^9}, {3.860670257720063*^9, 3.8606702608755703`*^9}, 
    3.860670357321578*^9, {3.8608393202951083`*^9, 3.860839327144682*^9}, {
    3.8608395360225525`*^9, 3.860839568560756*^9}, {3.860839626109659*^9, 
    3.8608396316532125`*^9}, {3.860839972322068*^9, 3.8608399940349*^9}, {
    3.8608404196123*^9, 3.860840428309719*^9}, {3.860840480919987*^9, 
    3.860840481588693*^9}, {3.860840536412998*^9, 3.8608405379998827`*^9}, {
    3.860840633619918*^9, 3.8608406562135906`*^9}, {3.8608407583448086`*^9, 
    3.86084082336386*^9}, {3.8608409345127068`*^9, 3.8608409351678333`*^9}, {
    3.86084105988897*^9, 3.8608410940155354`*^9}, {3.8608413360670547`*^9, 
    3.8608413526004543`*^9}, {3.860841580986247*^9, 3.8608416011112056`*^9}, {
    3.8608422038020997`*^9, 3.860842221049014*^9}, {3.861189494194888*^9, 
    3.861189496865979*^9}, {3.86119056512847*^9, 3.8611905745824733`*^9}, {
    3.8623951441743917`*^9, 3.862395332697236*^9}, 3.8623954053114996`*^9, {
    3.8623954515841923`*^9, 3.862395460222004*^9}, {3.8623954945791407`*^9, 
    3.8623955137183037`*^9}, {3.8752349401678534`*^9, 3.875234961536339*^9}, 
    3.875235172904148*^9, {3.8752352398820295`*^9, 3.875235316197029*^9}, {
    3.8752353506019335`*^9, 3.8752353807075663`*^9}, {3.875235414389227*^9, 
    3.8752354566803694`*^9}, {3.875235529313761*^9, 3.8752355300012703`*^9}, {
    3.87523563456826*^9, 3.8752356645246763`*^9}, {3.875235707223446*^9, 
    3.8752359593024373`*^9}, {3.8752359934424667`*^9, 3.875236049310521*^9}, {
    3.875236294987774*^9, 3.8752363050000896`*^9}, {3.875236383458136*^9, 
    3.8752364461073356`*^9}, {3.8752364788558893`*^9, 
    3.8752365706212935`*^9}, {3.875236707214814*^9, 3.875236709583338*^9}, {
    3.8752367641977963`*^9, 3.875236843994796*^9}, {3.875236896011919*^9, 
    3.875237166046666*^9}, {3.875237235531037*^9, 3.875237251461103*^9}, {
    3.8752372851071124`*^9, 3.875237299220729*^9}, {3.8752373346031885`*^9, 
    3.875237339867747*^9}, {3.875237376370146*^9, 3.875237532572172*^9}, {
    3.8752376224386363`*^9, 3.875237718894716*^9}, {3.875237760346624*^9, 
    3.875237774849938*^9}, {3.8752378624652424`*^9, 3.875237867705207*^9}, {
    3.8752380915617523`*^9, 3.8752380974494762`*^9}, {3.8752381451223817`*^9, 
    3.8752382219509845`*^9}, {3.8752384878004336`*^9, 3.875238517872681*^9}, 
    3.875238560792837*^9, {3.875238604702647*^9, 3.875238617957013*^9}, {
    3.875238737909627*^9, 3.875238748027789*^9}, {3.8753544661404305`*^9, 
    3.8753546174521494`*^9}, {3.875354653831521*^9, 3.8753546885927687`*^9}, {
    3.875365200482809*^9, 3.8753653714892845`*^9}, {3.8753654565315585`*^9, 
    3.8753655107946672`*^9}},ExpressionUUID->
  "c0717d25-67c7-4b02-a9bb-2ffae6e58772"], "Subsection"],
 StyleBox[", [A] remains constant and inactivates E.", "Subsection"]
}], "Subsection",
 CellChangeTimes->{
  3.8753669644399815`*^9, {3.8753670335400515`*^9, 3.875367090589787*^9}, {
   3.875407932627271*^9, 3.8754079471538987`*^9}, {3.8754083426137085`*^9, 
   3.8754083455977287`*^9}, {3.8755353546700697`*^9, 
   3.8755353546700697`*^9}, {3.875537637552716*^9, 3.875537685945177*^9}, {
   3.8755394347274957`*^9, 
   3.8755394354159236`*^9}},ExpressionUUID->"dd6a3105-053c-494d-a465-\
1e1f78b1aa76"],

Cell[CellGroupData[{

Cell[TextData[{
 StyleBox["Figure 6A&C (Mathematics-1964681)",
  FontWeight->"Bold"],
 ". Representative approximate analytically integrated solutions of the \
time-dependent variation of the concentration for (A) the products P and Q \
and (C) the two active enzyme states E and F, together with the inactivate \
state I, of a ping-pong reaction under non-steady-state conditions, in which \
the suicide substrate A undergoes disproportionation and inactivates (A, C) E \
, while its concentration remains constant "
}], "Subsubsection",
 CellChangeTimes->{
  3.8753669850694046`*^9, {3.875367125478444*^9, 3.875367178332805*^9}, 
   3.8754080311904435`*^9, {3.8754080620089025`*^9, 3.875408115512653*^9}, {
   3.875538196584683*^9, 3.875538197888897*^9}, 3.875766811563553*^9, {
   3.875767017100935*^9, 3.8757670708514943`*^9}, {3.8764968404201365`*^9, 
   3.8764968913530188`*^9}, 
   3.8764969336412945`*^9},ExpressionUUID->"66e2a5d3-add2-4c96-860e-\
914ca1f8aea1"],

Cell[CellGroupData[{

Cell[BoxData[{
 RowBox[{
  RowBox[{
   RowBox[{"-", 
    RowBox[{
     SuperscriptBox["cA", "\[Prime]",
      MultilineFunction->None], "[", "t", "]"}]}], "\[Equal]", 
   RowBox[{
    RowBox[{
     RowBox[{"(", 
      RowBox[{"ka", "+", "ki"}], ")"}], " ", 
     RowBox[{"cA", "[", "t", "]"}], " ", 
     RowBox[{"cE", "[", "t", "]"}]}], "+", 
    RowBox[{"kd", " ", 
     RowBox[{"cA", "[", "t", "]"}], " ", 
     RowBox[{"cF", "[", "t", "]"}]}]}]}], "/.", 
  RowBox[{
   RowBox[{"cA", "[", "t", "]"}], "\[Rule]", "cAo"}]}], "\n", 
 RowBox[{
  RowBox[{
   RowBox[{"-", 
    RowBox[{
     SuperscriptBox["cF", "\[Prime]",
      MultilineFunction->None], "[", "t", "]"}]}], "\[Equal]", 
   RowBox[{
    RowBox[{
     RowBox[{"-", "ka"}], " ", 
     RowBox[{"cA", "[", "t", "]"}], " ", 
     RowBox[{"cE", "[", "t", "]"}]}], "+", 
    RowBox[{"kd", " ", 
     RowBox[{"cA", "[", "t", "]"}], " ", 
     RowBox[{"cF", "[", "t", "]"}]}]}]}], "/.", 
  RowBox[{
   RowBox[{"cA", "[", "t", "]"}], "\[Rule]", "cAo"}]}], "\n", 
 RowBox[{
  RowBox[{
   RowBox[{"-", 
    RowBox[{
     SuperscriptBox["cE", "\[Prime]",
      MultilineFunction->None], "[", "t", "]"}]}], "\[Equal]", 
   RowBox[{
    RowBox[{
     RowBox[{"(", 
      RowBox[{"ka", "+", "ki"}], ")"}], " ", 
     RowBox[{"cA", "[", "t", "]"}], " ", 
     RowBox[{"cE", "[", "t", "]"}]}], "-", 
    RowBox[{"kd", " ", 
     RowBox[{"cA", "[", "t", "]"}], " ", 
     RowBox[{"cF", "[", "t", "]"}]}]}]}], "/.", 
  RowBox[{
   RowBox[{"cA", "[", "t", "]"}], "\[Rule]", "cAo"}]}], "\[IndentingNewLine]", 
 RowBox[{
  RowBox[{
   RowBox[{
    RowBox[{"cP", "'"}], "[", "t", "]"}], "\[Equal]", 
   RowBox[{"ka", "*", 
    RowBox[{"cA", "[", "t", "]"}], "*", 
    RowBox[{"cE", "[", "t", "]"}]}]}], "/.", 
  RowBox[{
   RowBox[{"cA", "[", "t", "]"}], "\[Rule]", "cAo"}]}], "\[IndentingNewLine]", 
 RowBox[{
  RowBox[{
   RowBox[{
    RowBox[{"cQ", "'"}], "[", "t", "]"}], "==", 
   RowBox[{"kd", "*", 
    RowBox[{"cA", "[", "t", "]"}], "*", 
    RowBox[{"cF", "[", "t", "]"}]}]}], "/.", 
  RowBox[{
   RowBox[{"cA", "[", "t", "]"}], "\[Rule]", "cAo"}]}], "\[IndentingNewLine]", 
 RowBox[{
  RowBox[{
   RowBox[{
    RowBox[{"cI", "'"}], "[", "t", "]"}], "==", 
   RowBox[{"ki", "*", 
    RowBox[{"cA", "[", "t", "]"}], "*", 
    RowBox[{"cE", "[", "t", "]"}]}]}], "/.", 
  RowBox[{
   RowBox[{"cA", "[", "t", "]"}], "\[Rule]", "cAo"}]}]}], "Input",
 CellChangeTimes->{{3.8755358240635443`*^9, 3.8755358668712454`*^9}, {
   3.8755372352072306`*^9, 3.875537265835023*^9}, 3.875537310067227*^9},
 CellLabel->"In[27]:=",ExpressionUUID->"910dc5d2-9285-4e3d-9be8-1f58cb582a25"],

Cell[BoxData[
 RowBox[{
  RowBox[{"-", 
   RowBox[{
    SuperscriptBox["cA", "\[Prime]",
     MultilineFunction->None], "[", "t", "]"}]}], "\[Equal]", 
  RowBox[{
   RowBox[{"cAo", " ", 
    RowBox[{"(", 
     RowBox[{"ka", "+", "ki"}], ")"}], " ", 
    RowBox[{"cE", "[", "t", "]"}]}], "+", 
   RowBox[{"cAo", " ", "kd", " ", 
    RowBox[{"cF", "[", "t", "]"}]}]}]}]], "Output",
 CellChangeTimes->{3.875535504944583*^9, 3.875535869333361*^9, 
  3.8755373475017614`*^9},
 CellLabel->"Out[27]=",ExpressionUUID->"cb3a2a11-0755-4c54-b260-f1a7ef26456c"],

Cell[BoxData[
 RowBox[{
  RowBox[{"-", 
   RowBox[{
    SuperscriptBox["cF", "\[Prime]",
     MultilineFunction->None], "[", "t", "]"}]}], "\[Equal]", 
  RowBox[{
   RowBox[{
    RowBox[{"-", "cAo"}], " ", "ka", " ", 
    RowBox[{"cE", "[", "t", "]"}]}], "+", 
   RowBox[{"cAo", " ", "kd", " ", 
    RowBox[{"cF", "[", "t", "]"}]}]}]}]], "Output",
 CellChangeTimes->{3.875535504944583*^9, 3.875535869333361*^9, 
  3.875537347505751*^9},
 CellLabel->"Out[28]=",ExpressionUUID->"cb740433-aaf3-48f9-b974-bfddbbe21196"],

Cell[BoxData[
 RowBox[{
  RowBox[{"-", 
   RowBox[{
    SuperscriptBox["cE", "\[Prime]",
     MultilineFunction->None], "[", "t", "]"}]}], "\[Equal]", 
  RowBox[{
   RowBox[{"cAo", " ", 
    RowBox[{"(", 
     RowBox[{"ka", "+", "ki"}], ")"}], " ", 
    RowBox[{"cE", "[", "t", "]"}]}], "-", 
   RowBox[{"cAo", " ", "kd", " ", 
    RowBox[{"cF", "[", "t", "]"}]}]}]}]], "Output",
 CellChangeTimes->{3.875535504944583*^9, 3.875535869333361*^9, 
  3.8755373475077457`*^9},
 CellLabel->"Out[29]=",ExpressionUUID->"05559a3c-047e-4134-b7f3-ecf7fae34deb"],

Cell[BoxData[
 RowBox[{
  RowBox[{
   SuperscriptBox["cP", "\[Prime]",
    MultilineFunction->None], "[", "t", "]"}], "\[Equal]", 
  RowBox[{"cAo", " ", "ka", " ", 
   RowBox[{"cE", "[", "t", "]"}]}]}]], "Output",
 CellChangeTimes->{3.875535504944583*^9, 3.875535869333361*^9, 
  3.875537347510738*^9},
 CellLabel->"Out[30]=",ExpressionUUID->"6b3e3c2b-af56-43e4-b625-4893fbf776e7"],

Cell[BoxData[
 RowBox[{
  RowBox[{
   SuperscriptBox["cQ", "\[Prime]",
    MultilineFunction->None], "[", "t", "]"}], "\[Equal]", 
  RowBox[{"cAo", " ", "kd", " ", 
   RowBox[{"cF", "[", "t", "]"}]}]}]], "Output",
 CellChangeTimes->{3.875535504944583*^9, 3.875535869333361*^9, 
  3.8755373475127325`*^9},
 CellLabel->"Out[31]=",ExpressionUUID->"2892a288-0fc7-49f2-9af2-396a15cfd0b0"],

Cell[BoxData[
 RowBox[{
  RowBox[{
   SuperscriptBox["cI", "\[Prime]",
    MultilineFunction->None], "[", "t", "]"}], "\[Equal]", 
  RowBox[{"cAo", " ", "ki", " ", 
   RowBox[{"cE", "[", "t", "]"}]}]}]], "Output",
 CellChangeTimes->{3.875535504944583*^9, 3.875535869333361*^9, 
  3.8755373475147266`*^9},
 CellLabel->"Out[32]=",ExpressionUUID->"9053c907-0908-4647-8ce0-823bf147b1c9"]
}, Open  ]],

Cell[CellGroupData[{

Cell[BoxData[
 RowBox[{"Simplify", "[", 
  RowBox[{
   RowBox[{"DSolve", "[", 
    RowBox[{
     RowBox[{"{", 
      RowBox[{
       RowBox[{
        RowBox[{"-", 
         RowBox[{
          SuperscriptBox["cF", "\[Prime]",
           MultilineFunction->None], "[", "t", "]"}]}], "\[Equal]", 
        RowBox[{
         RowBox[{
          RowBox[{"-", "cAo"}], " ", "ka", " ", 
          RowBox[{"cE", "[", "t", "]"}]}], "+", 
         RowBox[{"cAo", " ", "kd", " ", 
          RowBox[{"cF", "[", "t", "]"}]}]}]}], ",", 
       RowBox[{
        RowBox[{"-", 
         RowBox[{
          SuperscriptBox["cE", "\[Prime]",
           MultilineFunction->None], "[", "t", "]"}]}], "\[Equal]", 
        RowBox[{
         RowBox[{"cAo", " ", 
          RowBox[{"(", 
           RowBox[{"ka", "+", "ki"}], ")"}], " ", 
          RowBox[{"cE", "[", "t", "]"}]}], "-", 
         RowBox[{"cAo", " ", "kd", " ", 
          RowBox[{"cF", "[", "t", "]"}]}]}]}], ",", 
       RowBox[{
        RowBox[{"cE", "[", "0", "]"}], "\[Equal]", "cEo"}], ",", 
       RowBox[{
        RowBox[{"cF", "[", "0", "]"}], "\[Equal]", "0"}]}], "}"}], ",", 
     RowBox[{"{", 
      RowBox[{
       RowBox[{"cE", "[", "t", "]"}], ",", 
       RowBox[{"cF", "[", "t", "]"}]}], "}"}], ",", "t"}], "]"}], ",", 
   RowBox[{
    RowBox[{"ka", ">", "0"}], "&&", 
    RowBox[{"kd", ">", "0"}], "&&", 
    RowBox[{"ki", ">", "0"}], "&&", 
    RowBox[{"cAo", ">", "0"}], "&&", 
    RowBox[{"cEo", ">", "0"}], "&&", " ", 
    RowBox[{
     SqrtBox[
      RowBox[{
       RowBox[{
        RowBox[{"-", "4"}], " ", "kd", " ", "ki"}], "+", 
       SuperscriptBox[
        RowBox[{"(", 
         RowBox[{"ka", "+", "kd", "+", "ki"}], ")"}], "2"]}]], ">", "0"}]}]}],
   "]"}]], "Input",
 CellChangeTimes->{{3.8755355656767545`*^9, 3.8755355960901117`*^9}, 
   3.875535712339098*^9},
 CellLabel->"In[4]:=",ExpressionUUID->"fcce5c0e-7894-4154-8204-55235632b70a"],

Cell[BoxData[
 RowBox[{"{", 
  RowBox[{"{", 
   RowBox[{
    RowBox[{
     RowBox[{"cE", "[", "t", "]"}], "\[Rule]", 
     RowBox[{
      FractionBox["1", 
       RowBox[{"2", " ", 
        SqrtBox[
         RowBox[{
          RowBox[{
           RowBox[{"-", "4"}], " ", "kd", " ", "ki"}], "+", 
          SuperscriptBox[
           RowBox[{"(", 
            RowBox[{"ka", "+", "kd", "+", "ki"}], ")"}], "2"]}]]}]], 
      RowBox[{"cEo", " ", 
       SuperscriptBox["\[ExponentialE]", 
        RowBox[{
         RowBox[{"-", 
          FractionBox["1", "2"]}], " ", "cAo", " ", 
         RowBox[{"(", 
          RowBox[{"ka", "+", "kd", "+", "ki", "+", 
           SqrtBox[
            RowBox[{
             RowBox[{
              RowBox[{"-", "4"}], " ", "kd", " ", "ki"}], "+", 
             SuperscriptBox[
              RowBox[{"(", 
               RowBox[{"ka", "+", "kd", "+", "ki"}], ")"}], "2"]}]]}], ")"}], 
         " ", "t"}]], " ", 
       RowBox[{"(", 
        RowBox[{"ka", "-", 
         RowBox[{
          SuperscriptBox["\[ExponentialE]", 
           RowBox[{"cAo", " ", 
            SqrtBox[
             RowBox[{
              RowBox[{
               RowBox[{"-", "4"}], " ", "kd", " ", "ki"}], "+", 
              SuperscriptBox[
               RowBox[{"(", 
                RowBox[{"ka", "+", "kd", "+", "ki"}], ")"}], "2"]}]], " ", 
            "t"}]], " ", "ka"}], "-", "kd", "+", 
         RowBox[{
          SuperscriptBox["\[ExponentialE]", 
           RowBox[{"cAo", " ", 
            SqrtBox[
             RowBox[{
              RowBox[{
               RowBox[{"-", "4"}], " ", "kd", " ", "ki"}], "+", 
              SuperscriptBox[
               RowBox[{"(", 
                RowBox[{"ka", "+", "kd", "+", "ki"}], ")"}], "2"]}]], " ", 
            "t"}]], " ", "kd"}], "+", "ki", "-", 
         RowBox[{
          SuperscriptBox["\[ExponentialE]", 
           RowBox[{"cAo", " ", 
            SqrtBox[
             RowBox[{
              RowBox[{
               RowBox[{"-", "4"}], " ", "kd", " ", "ki"}], "+", 
              SuperscriptBox[
               RowBox[{"(", 
                RowBox[{"ka", "+", "kd", "+", "ki"}], ")"}], "2"]}]], " ", 
            "t"}]], " ", "ki"}], "+", 
         SqrtBox[
          RowBox[{
           RowBox[{
            RowBox[{"-", "4"}], " ", "kd", " ", "ki"}], "+", 
           SuperscriptBox[
            RowBox[{"(", 
             RowBox[{"ka", "+", "kd", "+", "ki"}], ")"}], "2"]}]], "+", 
         RowBox[{
          SuperscriptBox["\[ExponentialE]", 
           RowBox[{"cAo", " ", 
            SqrtBox[
             RowBox[{
              RowBox[{
               RowBox[{"-", "4"}], " ", "kd", " ", "ki"}], "+", 
              SuperscriptBox[
               RowBox[{"(", 
                RowBox[{"ka", "+", "kd", "+", "ki"}], ")"}], "2"]}]], " ", 
            "t"}]], " ", 
          SqrtBox[
           RowBox[{
            RowBox[{
             RowBox[{"-", "4"}], " ", "kd", " ", "ki"}], "+", 
            SuperscriptBox[
             RowBox[{"(", 
              RowBox[{"ka", "+", "kd", "+", "ki"}], ")"}], "2"]}]]}]}], 
        ")"}]}]}]}], ",", 
    RowBox[{
     RowBox[{"cF", "[", "t", "]"}], "\[Rule]", 
     FractionBox[
      RowBox[{"cEo", " ", 
       SuperscriptBox["\[ExponentialE]", 
        RowBox[{
         RowBox[{"-", 
          FractionBox["1", "2"]}], " ", "cAo", " ", 
         RowBox[{"(", 
          RowBox[{"ka", "+", "kd", "+", "ki", "+", 
           SqrtBox[
            RowBox[{
             RowBox[{
              RowBox[{"-", "4"}], " ", "kd", " ", "ki"}], "+", 
             SuperscriptBox[
              RowBox[{"(", 
               RowBox[{"ka", "+", "kd", "+", "ki"}], ")"}], "2"]}]]}], ")"}], 
         " ", "t"}]], " ", 
       RowBox[{"(", 
        RowBox[{
         RowBox[{"-", "1"}], "+", 
         SuperscriptBox["\[ExponentialE]", 
          RowBox[{"cAo", " ", 
           SqrtBox[
            RowBox[{
             RowBox[{
              RowBox[{"-", "4"}], " ", "kd", " ", "ki"}], "+", 
             SuperscriptBox[
              RowBox[{"(", 
               RowBox[{"ka", "+", "kd", "+", "ki"}], ")"}], "2"]}]], " ", 
           "t"}]]}], ")"}], " ", "ka"}], 
      SqrtBox[
       RowBox[{
        RowBox[{
         RowBox[{"-", "4"}], " ", "kd", " ", "ki"}], "+", 
        SuperscriptBox[
         RowBox[{"(", 
          RowBox[{"ka", "+", "kd", "+", "ki"}], ")"}], "2"]}]]]}]}], "}"}], 
  "}"}]], "Output",
 CellChangeTimes->{3.875535729861247*^9},
 CellLabel->"Out[4]=",ExpressionUUID->"6bd209c0-8d66-4aec-949d-627525f2a16f"]
}, Open  ]],

Cell[CellGroupData[{

Cell[BoxData[
 RowBox[{"Factor", "[", 
  RowBox[{"DSolve", "[", 
   RowBox[{
    RowBox[{"{", 
     RowBox[{
      RowBox[{
       RowBox[{
        RowBox[{
         SuperscriptBox["cP", "\[Prime]",
          MultilineFunction->None], "[", "t", "]"}], "\[Equal]", 
        RowBox[{"cAo", " ", "ka", " ", 
         RowBox[{"cE", "[", "t", "]"}]}]}], "/.", 
       RowBox[{
        RowBox[{"cE", "[", "t", "]"}], "\[Rule]", 
        RowBox[{
         FractionBox["1", 
          RowBox[{"2", " ", 
           SqrtBox[
            RowBox[{
             RowBox[{
              RowBox[{"-", "4"}], " ", "kd", " ", "ki"}], "+", 
             SuperscriptBox[
              RowBox[{"(", 
               RowBox[{"ka", "+", "kd", "+", "ki"}], ")"}], "2"]}]]}]], "cEo",
          " ", 
         SuperscriptBox["\[ExponentialE]", 
          RowBox[{
           RowBox[{"-", 
            FractionBox["1", "2"]}], " ", "cAo", " ", 
           RowBox[{"(", 
            RowBox[{"ka", "+", "kd", "+", "ki", "+", 
             SqrtBox[
              RowBox[{
               RowBox[{
                RowBox[{"-", "4"}], " ", "kd", " ", "ki"}], "+", 
               SuperscriptBox[
                RowBox[{"(", 
                 RowBox[{"ka", "+", "kd", "+", "ki"}], ")"}], "2"]}]]}], 
            ")"}], " ", "t"}]], " ", 
         RowBox[{"(", 
          RowBox[{"ka", "-", 
           RowBox[{
            SuperscriptBox["\[ExponentialE]", 
             RowBox[{"cAo", " ", 
              SqrtBox[
               RowBox[{
                RowBox[{
                 RowBox[{"-", "4"}], " ", "kd", " ", "ki"}], "+", 
                SuperscriptBox[
                 RowBox[{"(", 
                  RowBox[{"ka", "+", "kd", "+", "ki"}], ")"}], "2"]}]], " ", 
              "t"}]], " ", "ka"}], "-", "kd", "+", 
           RowBox[{
            SuperscriptBox["\[ExponentialE]", 
             RowBox[{"cAo", " ", 
              SqrtBox[
               RowBox[{
                RowBox[{
                 RowBox[{"-", "4"}], " ", "kd", " ", "ki"}], "+", 
                SuperscriptBox[
                 RowBox[{"(", 
                  RowBox[{"ka", "+", "kd", "+", "ki"}], ")"}], "2"]}]], " ", 
              "t"}]], " ", "kd"}], "+", "ki", "-", 
           RowBox[{
            SuperscriptBox["\[ExponentialE]", 
             RowBox[{"cAo", " ", 
              SqrtBox[
               RowBox[{
                RowBox[{
                 RowBox[{"-", "4"}], " ", "kd", " ", "ki"}], "+", 
                SuperscriptBox[
                 RowBox[{"(", 
                  RowBox[{"ka", "+", "kd", "+", "ki"}], ")"}], "2"]}]], " ", 
              "t"}]], " ", "ki"}], "+", 
           SqrtBox[
            RowBox[{
             RowBox[{
              RowBox[{"-", "4"}], " ", "kd", " ", "ki"}], "+", 
             SuperscriptBox[
              RowBox[{"(", 
               RowBox[{"ka", "+", "kd", "+", "ki"}], ")"}], "2"]}]], "+", 
           RowBox[{
            SuperscriptBox["\[ExponentialE]", 
             RowBox[{"cAo", " ", 
              SqrtBox[
               RowBox[{
                RowBox[{
                 RowBox[{"-", "4"}], " ", "kd", " ", "ki"}], "+", 
                SuperscriptBox[
                 RowBox[{"(", 
                  RowBox[{"ka", "+", "kd", "+", "ki"}], ")"}], "2"]}]], " ", 
              "t"}]], " ", 
            SqrtBox[
             RowBox[{
              RowBox[{
               RowBox[{"-", "4"}], " ", "kd", " ", "ki"}], "+", 
              SuperscriptBox[
               RowBox[{"(", 
                RowBox[{"ka", "+", "kd", "+", "ki"}], ")"}], "2"]}]]}]}], 
          ")"}]}]}]}], ",", 
      RowBox[{
       RowBox[{"cP", "[", "0", "]"}], "\[Equal]", "0"}]}], "}"}], ",", 
    RowBox[{"cP", "[", "t", "]"}], ",", "t"}], "]"}], "]"}]], "Input",
 CellChangeTimes->{{3.87553590520994*^9, 3.8755359169229*^9}, {
  3.8755359498376493`*^9, 3.8755360256124754`*^9}, {3.8755361772407475`*^9, 
  3.875536217331687*^9}, {3.875536271560383*^9, 3.875536277526325*^9}},
 CellLabel->"In[14]:=",ExpressionUUID->"1e4d02ff-1234-4597-8cf8-4f1aaf047563"],

Cell[BoxData[
 RowBox[{"{", 
  RowBox[{"{", 
   RowBox[{
    RowBox[{"cP", "[", "t", "]"}], "\[Rule]", 
    RowBox[{
     RowBox[{"(", 
      RowBox[{"cEo", " ", 
       SuperscriptBox["\[ExponentialE]", 
        RowBox[{
         RowBox[{"-", 
          FractionBox["1", "2"]}], " ", "cAo", " ", 
         RowBox[{"(", 
          RowBox[{"ka", "+", "kd", "+", "ki", "+", 
           SqrtBox[
            RowBox[{
             RowBox[{
              RowBox[{"-", "4"}], " ", "kd", " ", "ki"}], "+", 
             SuperscriptBox[
              RowBox[{"(", 
               RowBox[{"ka", "+", "kd", "+", "ki"}], ")"}], "2"]}]]}], ")"}], 
         " ", "t"}]], " ", "ka", " ", 
       RowBox[{"(", 
        RowBox[{"ka", "-", 
         RowBox[{
          SuperscriptBox["\[ExponentialE]", 
           RowBox[{"cAo", " ", 
            SqrtBox[
             RowBox[{
              RowBox[{
               RowBox[{"-", "4"}], " ", "kd", " ", "ki"}], "+", 
              SuperscriptBox[
               RowBox[{"(", 
                RowBox[{"ka", "+", "kd", "+", "ki"}], ")"}], "2"]}]], " ", 
            "t"}]], " ", "ka"}], "+", "kd", "-", 
         RowBox[{
          SuperscriptBox["\[ExponentialE]", 
           RowBox[{"cAo", " ", 
            SqrtBox[
             RowBox[{
              RowBox[{
               RowBox[{"-", "4"}], " ", "kd", " ", "ki"}], "+", 
              SuperscriptBox[
               RowBox[{"(", 
                RowBox[{"ka", "+", "kd", "+", "ki"}], ")"}], "2"]}]], " ", 
            "t"}]], " ", "kd"}], "-", "ki", "+", 
         RowBox[{
          SuperscriptBox["\[ExponentialE]", 
           RowBox[{"cAo", " ", 
            SqrtBox[
             RowBox[{
              RowBox[{
               RowBox[{"-", "4"}], " ", "kd", " ", "ki"}], "+", 
              SuperscriptBox[
               RowBox[{"(", 
                RowBox[{"ka", "+", "kd", "+", "ki"}], ")"}], "2"]}]], " ", 
            "t"}]], " ", "ki"}], "-", 
         SqrtBox[
          RowBox[{
           RowBox[{
            RowBox[{"-", "4"}], " ", "kd", " ", "ki"}], "+", 
           SuperscriptBox[
            RowBox[{"(", 
             RowBox[{"ka", "+", "kd", "+", "ki"}], ")"}], "2"]}]], "-", 
         RowBox[{
          SuperscriptBox["\[ExponentialE]", 
           RowBox[{"cAo", " ", 
            SqrtBox[
             RowBox[{
              RowBox[{
               RowBox[{"-", "4"}], " ", "kd", " ", "ki"}], "+", 
              SuperscriptBox[
               RowBox[{"(", 
                RowBox[{"ka", "+", "kd", "+", "ki"}], ")"}], "2"]}]], " ", 
            "t"}]], " ", 
          SqrtBox[
           RowBox[{
            RowBox[{
             RowBox[{"-", "4"}], " ", "kd", " ", "ki"}], "+", 
            SuperscriptBox[
             RowBox[{"(", 
              RowBox[{"ka", "+", "kd", "+", "ki"}], ")"}], "2"]}]]}], "+", 
         RowBox[{"2", " ", 
          SuperscriptBox["\[ExponentialE]", 
           RowBox[{
            FractionBox["1", "2"], " ", "cAo", " ", 
            RowBox[{"(", 
             RowBox[{"ka", "+", "kd", "+", "ki", "+", 
              SqrtBox[
               RowBox[{
                RowBox[{
                 RowBox[{"-", "4"}], " ", "kd", " ", "ki"}], "+", 
                SuperscriptBox[
                 RowBox[{"(", 
                  RowBox[{"ka", "+", "kd", "+", "ki"}], ")"}], "2"]}]]}], 
             ")"}], " ", "t"}]], " ", 
          SqrtBox[
           RowBox[{
            RowBox[{
             RowBox[{"-", "4"}], " ", "kd", " ", "ki"}], "+", 
            SuperscriptBox[
             RowBox[{"(", 
              RowBox[{"ka", "+", "kd", "+", "ki"}], ")"}], "2"]}]]}]}], 
        ")"}]}], ")"}], "/", 
     RowBox[{"(", 
      RowBox[{"2", " ", "ki", " ", 
       SqrtBox[
        RowBox[{
         RowBox[{
          RowBox[{"-", "4"}], " ", "kd", " ", "ki"}], "+", 
         SuperscriptBox[
          RowBox[{"(", 
           RowBox[{"ka", "+", "kd", "+", "ki"}], ")"}], "2"]}]]}], ")"}]}]}], 
   "}"}], "}"}]], "Output",
 CellChangeTimes->{3.8755360301746845`*^9, 3.87553619202242*^9, 
  3.8755362226850147`*^9, 3.87553628172195*^9},
 CellLabel->"Out[14]=",ExpressionUUID->"9886b9f3-39ac-4706-9a84-0737d5ae2d9b"]
}, Open  ]],

Cell[CellGroupData[{

Cell[BoxData[
 RowBox[{"Simplify", "[", 
  RowBox[{
   RowBox[{"Limit", "[", 
    RowBox[{
     RowBox[{
      RowBox[{"(", 
       RowBox[{"cEo", " ", 
        SuperscriptBox["\[ExponentialE]", 
         RowBox[{
          RowBox[{"-", 
           FractionBox["1", "2"]}], " ", "cAo", " ", 
          RowBox[{"(", 
           RowBox[{"ka", "+", "kd", "+", "ki", "+", 
            SqrtBox[
             RowBox[{
              RowBox[{
               RowBox[{"-", "4"}], " ", "kd", " ", "ki"}], "+", 
              SuperscriptBox[
               RowBox[{"(", 
                RowBox[{"ka", "+", "kd", "+", "ki"}], ")"}], "2"]}]]}], ")"}],
           " ", "t"}]], " ", "ka", " ", 
        RowBox[{"(", 
         RowBox[{"ka", "-", 
          RowBox[{
           SuperscriptBox["\[ExponentialE]", 
            RowBox[{"cAo", " ", 
             SqrtBox[
              RowBox[{
               RowBox[{
                RowBox[{"-", "4"}], " ", "kd", " ", "ki"}], "+", 
               SuperscriptBox[
                RowBox[{"(", 
                 RowBox[{"ka", "+", "kd", "+", "ki"}], ")"}], "2"]}]], " ", 
             "t"}]], " ", "ka"}], "+", "kd", "-", 
          RowBox[{
           SuperscriptBox["\[ExponentialE]", 
            RowBox[{"cAo", " ", 
             SqrtBox[
              RowBox[{
               RowBox[{
                RowBox[{"-", "4"}], " ", "kd", " ", "ki"}], "+", 
               SuperscriptBox[
                RowBox[{"(", 
                 RowBox[{"ka", "+", "kd", "+", "ki"}], ")"}], "2"]}]], " ", 
             "t"}]], " ", "kd"}], "-", "ki", "+", 
          RowBox[{
           SuperscriptBox["\[ExponentialE]", 
            RowBox[{"cAo", " ", 
             SqrtBox[
              RowBox[{
               RowBox[{
                RowBox[{"-", "4"}], " ", "kd", " ", "ki"}], "+", 
               SuperscriptBox[
                RowBox[{"(", 
                 RowBox[{"ka", "+", "kd", "+", "ki"}], ")"}], "2"]}]], " ", 
             "t"}]], " ", "ki"}], "-", 
          SqrtBox[
           RowBox[{
            RowBox[{
             RowBox[{"-", "4"}], " ", "kd", " ", "ki"}], "+", 
            SuperscriptBox[
             RowBox[{"(", 
              RowBox[{"ka", "+", "kd", "+", "ki"}], ")"}], "2"]}]], "-", 
          RowBox[{
           SuperscriptBox["\[ExponentialE]", 
            RowBox[{"cAo", " ", 
             SqrtBox[
              RowBox[{
               RowBox[{
                RowBox[{"-", "4"}], " ", "kd", " ", "ki"}], "+", 
               SuperscriptBox[
                RowBox[{"(", 
                 RowBox[{"ka", "+", "kd", "+", "ki"}], ")"}], "2"]}]], " ", 
             "t"}]], " ", 
           SqrtBox[
            RowBox[{
             RowBox[{
              RowBox[{"-", "4"}], " ", "kd", " ", "ki"}], "+", 
             SuperscriptBox[
              RowBox[{"(", 
               RowBox[{"ka", "+", "kd", "+", "ki"}], ")"}], "2"]}]]}], "+", 
          RowBox[{"2", " ", 
           SuperscriptBox["\[ExponentialE]", 
            RowBox[{
             FractionBox["1", "2"], " ", "cAo", " ", 
             RowBox[{"(", 
              RowBox[{"ka", "+", "kd", "+", "ki", "+", 
               SqrtBox[
                RowBox[{
                 RowBox[{
                  RowBox[{"-", "4"}], " ", "kd", " ", "ki"}], "+", 
                 SuperscriptBox[
                  RowBox[{"(", 
                   RowBox[{"ka", "+", "kd", "+", "ki"}], ")"}], "2"]}]]}], 
              ")"}], " ", "t"}]], " ", 
           SqrtBox[
            RowBox[{
             RowBox[{
              RowBox[{"-", "4"}], " ", "kd", " ", "ki"}], "+", 
             SuperscriptBox[
              RowBox[{"(", 
               RowBox[{"ka", "+", "kd", "+", "ki"}], ")"}], "2"]}]]}]}], 
         ")"}]}], ")"}], "/", 
      RowBox[{"(", 
       RowBox[{"2", " ", "ki", " ", 
        SqrtBox[
         RowBox[{
          RowBox[{
           RowBox[{"-", "4"}], " ", "kd", " ", "ki"}], "+", 
          SuperscriptBox[
           RowBox[{"(", 
            RowBox[{"ka", "+", "kd", "+", "ki"}], ")"}], "2"]}]]}], ")"}]}], 
     ",", 
     RowBox[{"t", "\[Rule]", "Infinity"}]}], "]"}], ",", 
   RowBox[{
    RowBox[{"ka", ">", "0"}], "&&", 
    RowBox[{"kd", ">", "0"}], "&&", 
    RowBox[{"ki", ">", "0"}], "&&", 
    RowBox[{"cAo", ">", "0"}], "&&", 
    RowBox[{"cEo", ">", "0"}]}]}], "]"}]], "Input",
 CellChangeTimes->{{3.8755369191548023`*^9, 3.8755370162294054`*^9}, {
  3.8755370575200315`*^9, 3.8755370613413105`*^9}},
 CellLabel->"In[25]:=",ExpressionUUID->"fb6769a2-8bd3-46d3-ad11-a0e3f89de74b"],

Cell[BoxData[
 FractionBox[
  RowBox[{"cEo", " ", "ka"}], "ki"]], "Output",
 CellChangeTimes->{
  3.875536975832594*^9, {3.875537012920275*^9, 3.8755370206520476`*^9}, 
   3.8755370654592404`*^9},
 CellLabel->"Out[25]=",ExpressionUUID->"297ca8de-6746-468a-8fa9-ca73c4dced93"]
}, Open  ]],

Cell[CellGroupData[{

Cell[BoxData[
 RowBox[{"Simplify", "[", 
  RowBox[{"Factor", "[", 
   RowBox[{"DSolve", "[", 
    RowBox[{
     RowBox[{"{", 
      RowBox[{
       RowBox[{
        RowBox[{
         RowBox[{
          SuperscriptBox["cQ", "\[Prime]",
           MultilineFunction->None], "[", "t", "]"}], "\[Equal]", 
         RowBox[{"cAo", " ", "kd", " ", 
          RowBox[{"cF", "[", "t", "]"}]}]}], "/.", 
        RowBox[{
         RowBox[{"cF", "[", "t", "]"}], "\[Rule]", 
         FractionBox[
          RowBox[{"cEo", " ", 
           SuperscriptBox["\[ExponentialE]", 
            RowBox[{
             RowBox[{"-", 
              FractionBox["1", "2"]}], " ", "cAo", " ", 
             RowBox[{"(", 
              RowBox[{"ka", "+", "kd", "+", "ki", "+", 
               SqrtBox[
                RowBox[{
                 RowBox[{
                  RowBox[{"-", "4"}], " ", "kd", " ", "ki"}], "+", 
                 SuperscriptBox[
                  RowBox[{"(", 
                   RowBox[{"ka", "+", "kd", "+", "ki"}], ")"}], "2"]}]]}], 
              ")"}], " ", "t"}]], " ", 
           RowBox[{"(", 
            RowBox[{
             RowBox[{"-", "1"}], "+", 
             SuperscriptBox["\[ExponentialE]", 
              RowBox[{"cAo", " ", 
               SqrtBox[
                RowBox[{
                 RowBox[{
                  RowBox[{"-", "4"}], " ", "kd", " ", "ki"}], "+", 
                 SuperscriptBox[
                  RowBox[{"(", 
                   RowBox[{"ka", "+", "kd", "+", "ki"}], ")"}], "2"]}]], " ", 
               "t"}]]}], ")"}], " ", "ka"}], 
          SqrtBox[
           RowBox[{
            RowBox[{
             RowBox[{"-", "4"}], " ", "kd", " ", "ki"}], "+", 
            SuperscriptBox[
             RowBox[{"(", 
              RowBox[{"ka", "+", "kd", "+", "ki"}], ")"}], "2"]}]]]}]}], ",", 
       RowBox[{
        RowBox[{"cQ", "[", "0", "]"}], "\[Equal]", "0"}]}], "}"}], ",", 
     RowBox[{"cQ", "[", "t", "]"}], ",", "t"}], "]"}], "]"}], "]"}]], "Input",
 CellChangeTimes->{{3.8755364315150537`*^9, 3.87553650284496*^9}},
 CellLabel->"In[18]:=",ExpressionUUID->"3b490e6f-f520-4cdf-998d-65ceebc73a2a"],

Cell[BoxData[
 RowBox[{"{", 
  RowBox[{"{", 
   RowBox[{
    RowBox[{"cQ", "[", "t", "]"}], "\[Rule]", 
    RowBox[{
     RowBox[{"(", 
      RowBox[{"cEo", " ", 
       SuperscriptBox["\[ExponentialE]", 
        RowBox[{
         RowBox[{"-", 
          FractionBox["1", "2"]}], " ", "cAo", " ", 
         RowBox[{"(", 
          RowBox[{"ka", "+", "kd", "+", "ki", "+", 
           SqrtBox[
            RowBox[{
             RowBox[{
              RowBox[{"-", "4"}], " ", "kd", " ", "ki"}], "+", 
             SuperscriptBox[
              RowBox[{"(", 
               RowBox[{"ka", "+", "kd", "+", "ki"}], ")"}], "2"]}]]}], ")"}], 
         " ", "t"}]], " ", "ka", " ", 
       RowBox[{"(", 
        RowBox[{"ka", "-", 
         RowBox[{
          SuperscriptBox["\[ExponentialE]", 
           RowBox[{"cAo", " ", 
            SqrtBox[
             RowBox[{
              RowBox[{
               RowBox[{"-", "4"}], " ", "kd", " ", "ki"}], "+", 
              SuperscriptBox[
               RowBox[{"(", 
                RowBox[{"ka", "+", "kd", "+", "ki"}], ")"}], "2"]}]], " ", 
            "t"}]], " ", "ka"}], "+", "kd", "-", 
         RowBox[{
          SuperscriptBox["\[ExponentialE]", 
           RowBox[{"cAo", " ", 
            SqrtBox[
             RowBox[{
              RowBox[{
               RowBox[{"-", "4"}], " ", "kd", " ", "ki"}], "+", 
              SuperscriptBox[
               RowBox[{"(", 
                RowBox[{"ka", "+", "kd", "+", "ki"}], ")"}], "2"]}]], " ", 
            "t"}]], " ", "kd"}], "+", "ki", "-", 
         RowBox[{
          SuperscriptBox["\[ExponentialE]", 
           RowBox[{"cAo", " ", 
            SqrtBox[
             RowBox[{
              RowBox[{
               RowBox[{"-", "4"}], " ", "kd", " ", "ki"}], "+", 
              SuperscriptBox[
               RowBox[{"(", 
                RowBox[{"ka", "+", "kd", "+", "ki"}], ")"}], "2"]}]], " ", 
            "t"}]], " ", "ki"}], "-", 
         SqrtBox[
          RowBox[{
           RowBox[{
            RowBox[{"-", "4"}], " ", "kd", " ", "ki"}], "+", 
           SuperscriptBox[
            RowBox[{"(", 
             RowBox[{"ka", "+", "kd", "+", "ki"}], ")"}], "2"]}]], "-", 
         RowBox[{
          SuperscriptBox["\[ExponentialE]", 
           RowBox[{"cAo", " ", 
            SqrtBox[
             RowBox[{
              RowBox[{
               RowBox[{"-", "4"}], " ", "kd", " ", "ki"}], "+", 
              SuperscriptBox[
               RowBox[{"(", 
                RowBox[{"ka", "+", "kd", "+", "ki"}], ")"}], "2"]}]], " ", 
            "t"}]], " ", 
          SqrtBox[
           RowBox[{
            RowBox[{
             RowBox[{"-", "4"}], " ", "kd", " ", "ki"}], "+", 
            SuperscriptBox[
             RowBox[{"(", 
              RowBox[{"ka", "+", "kd", "+", "ki"}], ")"}], "2"]}]]}], "+", 
         RowBox[{"2", " ", 
          SuperscriptBox["\[ExponentialE]", 
           RowBox[{
            FractionBox["1", "2"], " ", "cAo", " ", 
            RowBox[{"(", 
             RowBox[{"ka", "+", "kd", "+", "ki", "+", 
              SqrtBox[
               RowBox[{
                RowBox[{
                 RowBox[{"-", "4"}], " ", "kd", " ", "ki"}], "+", 
                SuperscriptBox[
                 RowBox[{"(", 
                  RowBox[{"ka", "+", "kd", "+", "ki"}], ")"}], "2"]}]]}], 
             ")"}], " ", "t"}]], " ", 
          SqrtBox[
           RowBox[{
            RowBox[{
             RowBox[{"-", "4"}], " ", "kd", " ", "ki"}], "+", 
            SuperscriptBox[
             RowBox[{"(", 
              RowBox[{"ka", "+", "kd", "+", "ki"}], ")"}], "2"]}]]}]}], 
        ")"}]}], ")"}], "/", 
     RowBox[{"(", 
      RowBox[{"2", " ", "ki", " ", 
       SqrtBox[
        RowBox[{
         RowBox[{
          RowBox[{"-", "4"}], " ", "kd", " ", "ki"}], "+", 
         SuperscriptBox[
          RowBox[{"(", 
           RowBox[{"ka", "+", "kd", "+", "ki"}], ")"}], "2"]}]]}], ")"}]}]}], 
   "}"}], "}"}]], "Output",
 CellChangeTimes->{3.8755364734154496`*^9, 3.875536504973222*^9},
 CellLabel->"Out[18]=",ExpressionUUID->"da2da597-ac43-44de-bc29-b74990fba69e"]
}, Open  ]],

Cell[CellGroupData[{

Cell[BoxData[
 RowBox[{"Simplify", "[", 
  RowBox[{
   RowBox[{"Limit", "[", 
    RowBox[{
     RowBox[{
      RowBox[{"(", 
       RowBox[{"cEo", " ", 
        SuperscriptBox["\[ExponentialE]", 
         RowBox[{
          RowBox[{"-", 
           FractionBox["1", "2"]}], " ", "cAo", " ", 
          RowBox[{"(", 
           RowBox[{"ka", "+", "kd", "+", "ki", "+", 
            SqrtBox[
             RowBox[{
              RowBox[{
               RowBox[{"-", "4"}], " ", "kd", " ", "ki"}], "+", 
              SuperscriptBox[
               RowBox[{"(", 
                RowBox[{"ka", "+", "kd", "+", "ki"}], ")"}], "2"]}]]}], ")"}],
           " ", "t"}]], " ", "ka", " ", 
        RowBox[{"(", 
         RowBox[{"ka", "-", 
          RowBox[{
           SuperscriptBox["\[ExponentialE]", 
            RowBox[{"cAo", " ", 
             SqrtBox[
              RowBox[{
               RowBox[{
                RowBox[{"-", "4"}], " ", "kd", " ", "ki"}], "+", 
               SuperscriptBox[
                RowBox[{"(", 
                 RowBox[{"ka", "+", "kd", "+", "ki"}], ")"}], "2"]}]], " ", 
             "t"}]], " ", "ka"}], "+", "kd", "-", 
          RowBox[{
           SuperscriptBox["\[ExponentialE]", 
            RowBox[{"cAo", " ", 
             SqrtBox[
              RowBox[{
               RowBox[{
                RowBox[{"-", "4"}], " ", "kd", " ", "ki"}], "+", 
               SuperscriptBox[
                RowBox[{"(", 
                 RowBox[{"ka", "+", "kd", "+", "ki"}], ")"}], "2"]}]], " ", 
             "t"}]], " ", "kd"}], "+", "ki", "-", 
          RowBox[{
           SuperscriptBox["\[ExponentialE]", 
            RowBox[{"cAo", " ", 
             SqrtBox[
              RowBox[{
               RowBox[{
                RowBox[{"-", "4"}], " ", "kd", " ", "ki"}], "+", 
               SuperscriptBox[
                RowBox[{"(", 
                 RowBox[{"ka", "+", "kd", "+", "ki"}], ")"}], "2"]}]], " ", 
             "t"}]], " ", "ki"}], "-", 
          SqrtBox[
           RowBox[{
            RowBox[{
             RowBox[{"-", "4"}], " ", "kd", " ", "ki"}], "+", 
            SuperscriptBox[
             RowBox[{"(", 
              RowBox[{"ka", "+", "kd", "+", "ki"}], ")"}], "2"]}]], "-", 
          RowBox[{
           SuperscriptBox["\[ExponentialE]", 
            RowBox[{"cAo", " ", 
             SqrtBox[
              RowBox[{
               RowBox[{
                RowBox[{"-", "4"}], " ", "kd", " ", "ki"}], "+", 
               SuperscriptBox[
                RowBox[{"(", 
                 RowBox[{"ka", "+", "kd", "+", "ki"}], ")"}], "2"]}]], " ", 
             "t"}]], " ", 
           SqrtBox[
            RowBox[{
             RowBox[{
              RowBox[{"-", "4"}], " ", "kd", " ", "ki"}], "+", 
             SuperscriptBox[
              RowBox[{"(", 
               RowBox[{"ka", "+", "kd", "+", "ki"}], ")"}], "2"]}]]}], "+", 
          RowBox[{"2", " ", 
           SuperscriptBox["\[ExponentialE]", 
            RowBox[{
             FractionBox["1", "2"], " ", "cAo", " ", 
             RowBox[{"(", 
              RowBox[{"ka", "+", "kd", "+", "ki", "+", 
               SqrtBox[
                RowBox[{
                 RowBox[{
                  RowBox[{"-", "4"}], " ", "kd", " ", "ki"}], "+", 
                 SuperscriptBox[
                  RowBox[{"(", 
                   RowBox[{"ka", "+", "kd", "+", "ki"}], ")"}], "2"]}]]}], 
              ")"}], " ", "t"}]], " ", 
           SqrtBox[
            RowBox[{
             RowBox[{
              RowBox[{"-", "4"}], " ", "kd", " ", "ki"}], "+", 
             SuperscriptBox[
              RowBox[{"(", 
               RowBox[{"ka", "+", "kd", "+", "ki"}], ")"}], "2"]}]]}]}], 
         ")"}]}], ")"}], "/", 
      RowBox[{"(", 
       RowBox[{"2", " ", "ki", " ", 
        SqrtBox[
         RowBox[{
          RowBox[{
           RowBox[{"-", "4"}], " ", "kd", " ", "ki"}], "+", 
          SuperscriptBox[
           RowBox[{"(", 
            RowBox[{"ka", "+", "kd", "+", "ki"}], ")"}], "2"]}]]}], ")"}]}], 
     ",", 
     RowBox[{"t", "\[Rule]", "Infinity"}]}], "]"}], ",", 
   RowBox[{
    RowBox[{"ka", ">", "0"}], "&&", 
    RowBox[{"kd", ">", "0"}], "&&", 
    RowBox[{"ki", ">", "0"}], "&&", 
    RowBox[{"cAo", ">", "0"}], "&&", 
    RowBox[{"cEo", ">", "0"}]}]}], "]"}]], "Input",
 CellChangeTimes->{3.8755371059755073`*^9},
 CellLabel->"In[26]:=",ExpressionUUID->"49a76b22-456c-4ade-8e18-547c09107950"],

Cell[BoxData[
 FractionBox[
  RowBox[{"cEo", " ", "ka"}], "ki"]], "Output",
 CellChangeTimes->{3.87553711768506*^9},
 CellLabel->"Out[26]=",ExpressionUUID->"7989240b-0c3b-4a73-b60a-19556a8418de"]
}, Open  ]],

Cell[CellGroupData[{

Cell[BoxData[
 RowBox[{"Factor", "[", 
  RowBox[{"DSolve", "[", 
   RowBox[{
    RowBox[{"{", 
     RowBox[{
      RowBox[{
       RowBox[{
        RowBox[{
         SuperscriptBox["cI", "\[Prime]",
          MultilineFunction->None], "[", "t", "]"}], "\[Equal]", 
        RowBox[{"cAo", " ", "ki", " ", 
         RowBox[{"cE", "[", "t", "]"}]}]}], "/.", 
       RowBox[{
        RowBox[{"cE", "[", "t", "]"}], "\[Rule]", 
        RowBox[{
         FractionBox["1", 
          RowBox[{"2", " ", 
           SqrtBox[
            RowBox[{
             RowBox[{
              RowBox[{"-", "4"}], " ", "kd", " ", "ki"}], "+", 
             SuperscriptBox[
              RowBox[{"(", 
               RowBox[{"ka", "+", "kd", "+", "ki"}], ")"}], "2"]}]]}]], "cEo",
          " ", 
         SuperscriptBox["\[ExponentialE]", 
          RowBox[{
           RowBox[{"-", 
            FractionBox["1", "2"]}], " ", "cAo", " ", 
           RowBox[{"(", 
            RowBox[{"ka", "+", "kd", "+", "ki", "+", 
             SqrtBox[
              RowBox[{
               RowBox[{
                RowBox[{"-", "4"}], " ", "kd", " ", "ki"}], "+", 
               SuperscriptBox[
                RowBox[{"(", 
                 RowBox[{"ka", "+", "kd", "+", "ki"}], ")"}], "2"]}]]}], 
            ")"}], " ", "t"}]], " ", 
         RowBox[{"(", 
          RowBox[{"ka", "-", 
           RowBox[{
            SuperscriptBox["\[ExponentialE]", 
             RowBox[{"cAo", " ", 
              SqrtBox[
               RowBox[{
                RowBox[{
                 RowBox[{"-", "4"}], " ", "kd", " ", "ki"}], "+", 
                SuperscriptBox[
                 RowBox[{"(", 
                  RowBox[{"ka", "+", "kd", "+", "ki"}], ")"}], "2"]}]], " ", 
              "t"}]], " ", "ka"}], "-", "kd", "+", 
           RowBox[{
            SuperscriptBox["\[ExponentialE]", 
             RowBox[{"cAo", " ", 
              SqrtBox[
               RowBox[{
                RowBox[{
                 RowBox[{"-", "4"}], " ", "kd", " ", "ki"}], "+", 
                SuperscriptBox[
                 RowBox[{"(", 
                  RowBox[{"ka", "+", "kd", "+", "ki"}], ")"}], "2"]}]], " ", 
              "t"}]], " ", "kd"}], "+", "ki", "-", 
           RowBox[{
            SuperscriptBox["\[ExponentialE]", 
             RowBox[{"cAo", " ", 
              SqrtBox[
               RowBox[{
                RowBox[{
                 RowBox[{"-", "4"}], " ", "kd", " ", "ki"}], "+", 
                SuperscriptBox[
                 RowBox[{"(", 
                  RowBox[{"ka", "+", "kd", "+", "ki"}], ")"}], "2"]}]], " ", 
              "t"}]], " ", "ki"}], "+", 
           SqrtBox[
            RowBox[{
             RowBox[{
              RowBox[{"-", "4"}], " ", "kd", " ", "ki"}], "+", 
             SuperscriptBox[
              RowBox[{"(", 
               RowBox[{"ka", "+", "kd", "+", "ki"}], ")"}], "2"]}]], "+", 
           RowBox[{
            SuperscriptBox["\[ExponentialE]", 
             RowBox[{"cAo", " ", 
              SqrtBox[
               RowBox[{
                RowBox[{
                 RowBox[{"-", "4"}], " ", "kd", " ", "ki"}], "+", 
                SuperscriptBox[
                 RowBox[{"(", 
                  RowBox[{"ka", "+", "kd", "+", "ki"}], ")"}], "2"]}]], " ", 
              "t"}]], " ", 
            SqrtBox[
             RowBox[{
              RowBox[{
               RowBox[{"-", "4"}], " ", "kd", " ", "ki"}], "+", 
              SuperscriptBox[
               RowBox[{"(", 
                RowBox[{"ka", "+", "kd", "+", "ki"}], ")"}], "2"]}]]}]}], 
          ")"}]}]}]}], ",", 
      RowBox[{
       RowBox[{"cI", "[", "0", "]"}], "\[Equal]", "0"}]}], "}"}], ",", 
    RowBox[{"cI", "[", "t", "]"}], ",", "t"}], "]"}], "]"}]], "Input",
 CellChangeTimes->{{3.8755374706970406`*^9, 3.8755374873614335`*^9}},
 CellLabel->"In[33]:=",ExpressionUUID->"05161130-059c-4652-a48c-3e63063f8cee"],

Cell[BoxData[
 RowBox[{"{", 
  RowBox[{"{", 
   RowBox[{
    RowBox[{"cI", "[", "t", "]"}], "\[Rule]", 
    RowBox[{
     FractionBox["1", 
      RowBox[{"2", " ", 
       SqrtBox[
        RowBox[{
         RowBox[{
          RowBox[{"-", "4"}], " ", "kd", " ", "ki"}], "+", 
         SuperscriptBox[
          RowBox[{"(", 
           RowBox[{"ka", "+", "kd", "+", "ki"}], ")"}], "2"]}]]}]], 
     RowBox[{"cEo", " ", 
      SuperscriptBox["\[ExponentialE]", 
       RowBox[{
        RowBox[{"-", 
         FractionBox["1", "2"]}], " ", "cAo", " ", 
        RowBox[{"(", 
         RowBox[{"ka", "+", "kd", "+", "ki", "+", 
          SqrtBox[
           RowBox[{
            RowBox[{
             RowBox[{"-", "4"}], " ", "kd", " ", "ki"}], "+", 
            SuperscriptBox[
             RowBox[{"(", 
              RowBox[{"ka", "+", "kd", "+", "ki"}], ")"}], "2"]}]]}], ")"}], 
        " ", "t"}]], " ", 
      RowBox[{"(", 
       RowBox[{"ka", "-", 
        RowBox[{
         SuperscriptBox["\[ExponentialE]", 
          RowBox[{"cAo", " ", 
           SqrtBox[
            RowBox[{
             RowBox[{
              RowBox[{"-", "4"}], " ", "kd", " ", "ki"}], "+", 
             SuperscriptBox[
              RowBox[{"(", 
               RowBox[{"ka", "+", "kd", "+", "ki"}], ")"}], "2"]}]], " ", 
           "t"}]], " ", "ka"}], "+", "kd", "-", 
        RowBox[{
         SuperscriptBox["\[ExponentialE]", 
          RowBox[{"cAo", " ", 
           SqrtBox[
            RowBox[{
             RowBox[{
              RowBox[{"-", "4"}], " ", "kd", " ", "ki"}], "+", 
             SuperscriptBox[
              RowBox[{"(", 
               RowBox[{"ka", "+", "kd", "+", "ki"}], ")"}], "2"]}]], " ", 
           "t"}]], " ", "kd"}], "-", "ki", "+", 
        RowBox[{
         SuperscriptBox["\[ExponentialE]", 
          RowBox[{"cAo", " ", 
           SqrtBox[
            RowBox[{
             RowBox[{
              RowBox[{"-", "4"}], " ", "kd", " ", "ki"}], "+", 
             SuperscriptBox[
              RowBox[{"(", 
               RowBox[{"ka", "+", "kd", "+", "ki"}], ")"}], "2"]}]], " ", 
           "t"}]], " ", "ki"}], "-", 
        SqrtBox[
         RowBox[{
          RowBox[{
           RowBox[{"-", "4"}], " ", "kd", " ", "ki"}], "+", 
          SuperscriptBox[
           RowBox[{"(", 
            RowBox[{"ka", "+", "kd", "+", "ki"}], ")"}], "2"]}]], "-", 
        RowBox[{
         SuperscriptBox["\[ExponentialE]", 
          RowBox[{"cAo", " ", 
           SqrtBox[
            RowBox[{
             RowBox[{
              RowBox[{"-", "4"}], " ", "kd", " ", "ki"}], "+", 
             SuperscriptBox[
              RowBox[{"(", 
               RowBox[{"ka", "+", "kd", "+", "ki"}], ")"}], "2"]}]], " ", 
           "t"}]], " ", 
         SqrtBox[
          RowBox[{
           RowBox[{
            RowBox[{"-", "4"}], " ", "kd", " ", "ki"}], "+", 
           SuperscriptBox[
            RowBox[{"(", 
             RowBox[{"ka", "+", "kd", "+", "ki"}], ")"}], "2"]}]]}], "+", 
        RowBox[{"2", " ", 
         SuperscriptBox["\[ExponentialE]", 
          RowBox[{
           FractionBox["1", "2"], " ", "cAo", " ", 
           RowBox[{"(", 
            RowBox[{"ka", "+", "kd", "+", "ki", "+", 
             SqrtBox[
              RowBox[{
               RowBox[{
                RowBox[{"-", "4"}], " ", "kd", " ", "ki"}], "+", 
               SuperscriptBox[
                RowBox[{"(", 
                 RowBox[{"ka", "+", "kd", "+", "ki"}], ")"}], "2"]}]]}], 
            ")"}], " ", "t"}]], " ", 
         SqrtBox[
          RowBox[{
           RowBox[{
            RowBox[{"-", "4"}], " ", "kd", " ", "ki"}], "+", 
           SuperscriptBox[
            RowBox[{"(", 
             RowBox[{"ka", "+", "kd", "+", "ki"}], ")"}], "2"]}]]}]}], 
       ")"}]}]}]}], "}"}], "}"}]], "Output",
 CellChangeTimes->{3.875537493541662*^9},
 CellLabel->"Out[33]=",ExpressionUUID->"e2949cce-e2c3-4d5e-88a2-dab0ba392486"]
}, Open  ]],

Cell[CellGroupData[{

Cell[BoxData[
 RowBox[{"Simplify", "[", 
  RowBox[{
   RowBox[{"Limit", "[", 
    RowBox[{
     RowBox[{
      FractionBox["1", 
       RowBox[{"2", " ", 
        SqrtBox[
         RowBox[{
          RowBox[{
           RowBox[{"-", "4"}], " ", "kd", " ", "ki"}], "+", 
          SuperscriptBox[
           RowBox[{"(", 
            RowBox[{"ka", "+", "kd", "+", "ki"}], ")"}], "2"]}]]}]], "cEo", 
      " ", 
      SuperscriptBox["\[ExponentialE]", 
       RowBox[{
        RowBox[{"-", 
         FractionBox["1", "2"]}], " ", "cAo", " ", 
        RowBox[{"(", 
         RowBox[{"ka", "+", "kd", "+", "ki", "+", 
          SqrtBox[
           RowBox[{
            RowBox[{
             RowBox[{"-", "4"}], " ", "kd", " ", "ki"}], "+", 
            SuperscriptBox[
             RowBox[{"(", 
              RowBox[{"ka", "+", "kd", "+", "ki"}], ")"}], "2"]}]]}], ")"}], 
        " ", "t"}]], " ", 
      RowBox[{"(", 
       RowBox[{"ka", "-", 
        RowBox[{
         SuperscriptBox["\[ExponentialE]", 
          RowBox[{"cAo", " ", 
           SqrtBox[
            RowBox[{
             RowBox[{
              RowBox[{"-", "4"}], " ", "kd", " ", "ki"}], "+", 
             SuperscriptBox[
              RowBox[{"(", 
               RowBox[{"ka", "+", "kd", "+", "ki"}], ")"}], "2"]}]], " ", 
           "t"}]], " ", "ka"}], "+", "kd", "-", 
        RowBox[{
         SuperscriptBox["\[ExponentialE]", 
          RowBox[{"cAo", " ", 
           SqrtBox[
            RowBox[{
             RowBox[{
              RowBox[{"-", "4"}], " ", "kd", " ", "ki"}], "+", 
             SuperscriptBox[
              RowBox[{"(", 
               RowBox[{"ka", "+", "kd", "+", "ki"}], ")"}], "2"]}]], " ", 
           "t"}]], " ", "kd"}], "-", "ki", "+", 
        RowBox[{
         SuperscriptBox["\[ExponentialE]", 
          RowBox[{"cAo", " ", 
           SqrtBox[
            RowBox[{
             RowBox[{
              RowBox[{"-", "4"}], " ", "kd", " ", "ki"}], "+", 
             SuperscriptBox[
              RowBox[{"(", 
               RowBox[{"ka", "+", "kd", "+", "ki"}], ")"}], "2"]}]], " ", 
           "t"}]], " ", "ki"}], "-", 
        SqrtBox[
         RowBox[{
          RowBox[{
           RowBox[{"-", "4"}], " ", "kd", " ", "ki"}], "+", 
          SuperscriptBox[
           RowBox[{"(", 
            RowBox[{"ka", "+", "kd", "+", "ki"}], ")"}], "2"]}]], "-", 
        RowBox[{
         SuperscriptBox["\[ExponentialE]", 
          RowBox[{"cAo", " ", 
           SqrtBox[
            RowBox[{
             RowBox[{
              RowBox[{"-", "4"}], " ", "kd", " ", "ki"}], "+", 
             SuperscriptBox[
              RowBox[{"(", 
               RowBox[{"ka", "+", "kd", "+", "ki"}], ")"}], "2"]}]], " ", 
           "t"}]], " ", 
         SqrtBox[
          RowBox[{
           RowBox[{
            RowBox[{"-", "4"}], " ", "kd", " ", "ki"}], "+", 
           SuperscriptBox[
            RowBox[{"(", 
             RowBox[{"ka", "+", "kd", "+", "ki"}], ")"}], "2"]}]]}], "+", 
        RowBox[{"2", " ", 
         SuperscriptBox["\[ExponentialE]", 
          RowBox[{
           FractionBox["1", "2"], " ", "cAo", " ", 
           RowBox[{"(", 
            RowBox[{"ka", "+", "kd", "+", "ki", "+", 
             SqrtBox[
              RowBox[{
               RowBox[{
                RowBox[{"-", "4"}], " ", "kd", " ", "ki"}], "+", 
               SuperscriptBox[
                RowBox[{"(", 
                 RowBox[{"ka", "+", "kd", "+", "ki"}], ")"}], "2"]}]]}], 
            ")"}], " ", "t"}]], " ", 
         SqrtBox[
          RowBox[{
           RowBox[{
            RowBox[{"-", "4"}], " ", "kd", " ", "ki"}], "+", 
           SuperscriptBox[
            RowBox[{"(", 
             RowBox[{"ka", "+", "kd", "+", "ki"}], ")"}], "2"]}]]}]}], 
       ")"}]}], ",", 
     RowBox[{"t", "\[Rule]", "Infinity"}]}], "]"}], ",", 
   RowBox[{
    RowBox[{"ka", ">", "0"}], "&&", 
    RowBox[{"kd", ">", "0"}], "&&", 
    RowBox[{"ki", ">", "0"}], "&&", 
    RowBox[{"cAo", ">", "0"}], "&&", 
    RowBox[{"cEo", ">", "0"}]}]}], "]"}]], "Input",
 CellChangeTimes->{3.8755375222880273`*^9},
 CellLabel->"In[34]:=",ExpressionUUID->"02741836-0f29-42b6-99fd-5b52317a0cea"],

Cell[BoxData["cEo"], "Output",
 CellChangeTimes->{3.8755375351779757`*^9},
 CellLabel->"Out[34]=",ExpressionUUID->"011dba62-5e35-406a-9b20-517cd3eefeac"]
}, Open  ]],

Cell[CellGroupData[{

Cell[BoxData[
 RowBox[{
  RowBox[{"Manipulate", "[", 
   RowBox[{
    RowBox[{"Module", "[", 
     RowBox[{
      RowBox[{"{", 
       RowBox[{
       "PingPongModel1", ",", "eqPe", ",", "eqPeL", ",", "eqQe", ",", "eqQeL",
         ",", "eqEe", ",", "eqFe", ",", "eqIe", ",", "eqIeL", ",", "soln", 
        ",", " ", "plot1", ",", "plot2"}], "}"}], ",", "\[IndentingNewLine]", 
      RowBox[{
       RowBox[{"PingPongModel1", "=", 
        RowBox[{"Sequence", "[", "\[IndentingNewLine]", 
         RowBox[{
          RowBox[{"PlotRange", "\[Rule]", "Full"}], ",", 
          "\[IndentingNewLine]", 
          RowBox[{"PlotLabel", "\[Rule]", 
           RowBox[{"Style", "[", 
            RowBox[{
            "\"\<Ping-Pong Reaction with One Substrate Undergoing \
Disproportionation\nin the Presence of Suicide Substrate Inactivation ([A] \
remains contant, \!\(\*SubscriptBox[StyleBox[\"k\",FontSlant->\"Italic\"], \
\"c\"]\) \[RightArrow] \[Infinity] and \
\!\(\*SubscriptBox[StyleBox[\"k\",FontSlant->\"Italic\"], \"f\"]\) \
\[RightArrow] \[Infinity]):\nA + E \[LongRightArrow] P + F\nA + F \
\[LongRightArrow] Q + E\nA + E \[LongRightArrow] I\>\"", ",", 
             RowBox[{"FontSize", "\[Rule]", "14"}]}], "]"}]}], ",", 
          "\[IndentingNewLine]", 
          RowBox[{"Frame", "\[Rule]", "True"}], ",", "\[IndentingNewLine]", 
          RowBox[{"FrameLabel", "\[Rule]", 
           RowBox[{"{", 
            RowBox[{
            "\"\<Time, s\>\"", ",", 
             "\"\<[ ], \!\(\*FormBox[RowBox[{\"mol\", \" \", \
SuperscriptBox[RowBox[{StyleBox[\"m\",FontSlant->\"Plain\"], \" \"}], \
RowBox[{\"\[Dash]\", \"3\"}]]}],TraditionalForm]\)\>\""}], "}"}]}], ",", 
          "\[IndentingNewLine]", 
          RowBox[{"LabelStyle", "\[Rule]", 
           RowBox[{"{", 
            RowBox[{"FontSize", "\[Rule]", "14"}], "}"}]}], ",", 
          "\[IndentingNewLine]", 
          RowBox[{"ImageSize", "\[Rule]", 
           RowBox[{"1.2", 
            RowBox[{"{", 
             RowBox[{"480", ",", "310"}], "}"}]}]}]}], "]"}]}], ";", 
       "\[IndentingNewLine]", 
       RowBox[{"eqPe", "=", 
        RowBox[{
         RowBox[{"(", 
          RowBox[{"cEo", " ", 
           SuperscriptBox["\[ExponentialE]", 
            RowBox[{
             RowBox[{"-", 
              FractionBox["1", "2"]}], " ", "cAo", " ", 
             RowBox[{"(", 
              RowBox[{"ka", "+", "kd", "+", "ki", "+", 
               SqrtBox[
                RowBox[{
                 RowBox[{
                  RowBox[{"-", "4"}], " ", "kd", " ", "ki"}], "+", 
                 SuperscriptBox[
                  RowBox[{"(", 
                   RowBox[{"ka", "+", "kd", "+", "ki"}], ")"}], "2"]}]]}], 
              ")"}], " ", "t"}]], " ", "ka", " ", 
           RowBox[{"(", 
            RowBox[{"ka", "-", 
             RowBox[{
              SuperscriptBox["\[ExponentialE]", 
               RowBox[{"cAo", " ", 
                SqrtBox[
                 RowBox[{
                  RowBox[{
                   RowBox[{"-", "4"}], " ", "kd", " ", "ki"}], "+", 
                  SuperscriptBox[
                   RowBox[{"(", 
                    RowBox[{"ka", "+", "kd", "+", "ki"}], ")"}], "2"]}]], " ",
                 "t"}]], " ", "ka"}], "+", "kd", "-", 
             RowBox[{
              SuperscriptBox["\[ExponentialE]", 
               RowBox[{"cAo", " ", 
                SqrtBox[
                 RowBox[{
                  RowBox[{
                   RowBox[{"-", "4"}], " ", "kd", " ", "ki"}], "+", 
                  SuperscriptBox[
                   RowBox[{"(", 
                    RowBox[{"ka", "+", "kd", "+", "ki"}], ")"}], "2"]}]], " ",
                 "t"}]], " ", "kd"}], "-", "ki", "+", 
             RowBox[{
              SuperscriptBox["\[ExponentialE]", 
               RowBox[{"cAo", " ", 
                SqrtBox[
                 RowBox[{
                  RowBox[{
                   RowBox[{"-", "4"}], " ", "kd", " ", "ki"}], "+", 
                  SuperscriptBox[
                   RowBox[{"(", 
                    RowBox[{"ka", "+", "kd", "+", "ki"}], ")"}], "2"]}]], " ",
                 "t"}]], " ", "ki"}], "-", 
             SqrtBox[
              RowBox[{
               RowBox[{
                RowBox[{"-", "4"}], " ", "kd", " ", "ki"}], "+", 
               SuperscriptBox[
                RowBox[{"(", 
                 RowBox[{"ka", "+", "kd", "+", "ki"}], ")"}], "2"]}]], "-", 
             RowBox[{
              SuperscriptBox["\[ExponentialE]", 
               RowBox[{"cAo", " ", 
                SqrtBox[
                 RowBox[{
                  RowBox[{
                   RowBox[{"-", "4"}], " ", "kd", " ", "ki"}], "+", 
                  SuperscriptBox[
                   RowBox[{"(", 
                    RowBox[{"ka", "+", "kd", "+", "ki"}], ")"}], "2"]}]], " ",
                 "t"}]], " ", 
              SqrtBox[
               RowBox[{
                RowBox[{
                 RowBox[{"-", "4"}], " ", "kd", " ", "ki"}], "+", 
                SuperscriptBox[
                 RowBox[{"(", 
                  RowBox[{"ka", "+", "kd", "+", "ki"}], ")"}], "2"]}]]}], "+", 
             RowBox[{"2", " ", 
              SuperscriptBox["\[ExponentialE]", 
               RowBox[{
                FractionBox["1", "2"], " ", "cAo", " ", 
                RowBox[{"(", 
                 RowBox[{"ka", "+", "kd", "+", "ki", "+", 
                  SqrtBox[
                   RowBox[{
                    RowBox[{
                    RowBox[{"-", "4"}], " ", "kd", " ", "ki"}], "+", 
                    SuperscriptBox[
                    RowBox[{"(", 
                    RowBox[{"ka", "+", "kd", "+", "ki"}], ")"}], "2"]}]]}], 
                 ")"}], " ", "t"}]], " ", 
              SqrtBox[
               RowBox[{
                RowBox[{
                 RowBox[{"-", "4"}], " ", "kd", " ", "ki"}], "+", 
                SuperscriptBox[
                 RowBox[{"(", 
                  RowBox[{"ka", "+", "kd", "+", "ki"}], ")"}], "2"]}]]}]}], 
            ")"}]}], ")"}], "/", 
         RowBox[{"(", 
          RowBox[{"2", " ", "ki", " ", 
           SqrtBox[
            RowBox[{
             RowBox[{
              RowBox[{"-", "4"}], " ", "kd", " ", "ki"}], "+", 
             SuperscriptBox[
              RowBox[{"(", 
               RowBox[{"ka", "+", "kd", "+", "ki"}], ")"}], "2"]}]]}], 
          ")"}]}]}], ";", "\[IndentingNewLine]", 
       RowBox[{"eqPeL", "=", 
        RowBox[{"Limit", "[", 
         RowBox[{"eqPe", ",", 
          RowBox[{"t", "\[Rule]", "Infinity"}]}], "]"}]}], ";", 
       "\[IndentingNewLine]", 
       RowBox[{"eqQe", "=", 
        RowBox[{
         RowBox[{"(", 
          RowBox[{"cEo", " ", 
           SuperscriptBox["\[ExponentialE]", 
            RowBox[{
             RowBox[{"-", 
              FractionBox["1", "2"]}], " ", "cAo", " ", 
             RowBox[{"(", 
              RowBox[{"ka", "+", "kd", "+", "ki", "+", 
               SqrtBox[
                RowBox[{
                 RowBox[{
                  RowBox[{"-", "4"}], " ", "kd", " ", "ki"}], "+", 
                 SuperscriptBox[
                  RowBox[{"(", 
                   RowBox[{"ka", "+", "kd", "+", "ki"}], ")"}], "2"]}]]}], 
              ")"}], " ", "t"}]], " ", "ka", " ", 
           RowBox[{"(", 
            RowBox[{"ka", "-", 
             RowBox[{
              SuperscriptBox["\[ExponentialE]", 
               RowBox[{"cAo", " ", 
                SqrtBox[
                 RowBox[{
                  RowBox[{
                   RowBox[{"-", "4"}], " ", "kd", " ", "ki"}], "+", 
                  SuperscriptBox[
                   RowBox[{"(", 
                    RowBox[{"ka", "+", "kd", "+", "ki"}], ")"}], "2"]}]], " ",
                 "t"}]], " ", "ka"}], "+", "kd", "-", 
             RowBox[{
              SuperscriptBox["\[ExponentialE]", 
               RowBox[{"cAo", " ", 
                SqrtBox[
                 RowBox[{
                  RowBox[{
                   RowBox[{"-", "4"}], " ", "kd", " ", "ki"}], "+", 
                  SuperscriptBox[
                   RowBox[{"(", 
                    RowBox[{"ka", "+", "kd", "+", "ki"}], ")"}], "2"]}]], " ",
                 "t"}]], " ", "kd"}], "+", "ki", "-", 
             RowBox[{
              SuperscriptBox["\[ExponentialE]", 
               RowBox[{"cAo", " ", 
                SqrtBox[
                 RowBox[{
                  RowBox[{
                   RowBox[{"-", "4"}], " ", "kd", " ", "ki"}], "+", 
                  SuperscriptBox[
                   RowBox[{"(", 
                    RowBox[{"ka", "+", "kd", "+", "ki"}], ")"}], "2"]}]], " ",
                 "t"}]], " ", "ki"}], "-", 
             SqrtBox[
              RowBox[{
               RowBox[{
                RowBox[{"-", "4"}], " ", "kd", " ", "ki"}], "+", 
               SuperscriptBox[
                RowBox[{"(", 
                 RowBox[{"ka", "+", "kd", "+", "ki"}], ")"}], "2"]}]], "-", 
             RowBox[{
              SuperscriptBox["\[ExponentialE]", 
               RowBox[{"cAo", " ", 
                SqrtBox[
                 RowBox[{
                  RowBox[{
                   RowBox[{"-", "4"}], " ", "kd", " ", "ki"}], "+", 
                  SuperscriptBox[
                   RowBox[{"(", 
                    RowBox[{"ka", "+", "kd", "+", "ki"}], ")"}], "2"]}]], " ",
                 "t"}]], " ", 
              SqrtBox[
               RowBox[{
                RowBox[{
                 RowBox[{"-", "4"}], " ", "kd", " ", "ki"}], "+", 
                SuperscriptBox[
                 RowBox[{"(", 
                  RowBox[{"ka", "+", "kd", "+", "ki"}], ")"}], "2"]}]]}], "+", 
             RowBox[{"2", " ", 
              SuperscriptBox["\[ExponentialE]", 
               RowBox[{
                FractionBox["1", "2"], " ", "cAo", " ", 
                RowBox[{"(", 
                 RowBox[{"ka", "+", "kd", "+", "ki", "+", 
                  SqrtBox[
                   RowBox[{
                    RowBox[{
                    RowBox[{"-", "4"}], " ", "kd", " ", "ki"}], "+", 
                    SuperscriptBox[
                    RowBox[{"(", 
                    RowBox[{"ka", "+", "kd", "+", "ki"}], ")"}], "2"]}]]}], 
                 ")"}], " ", "t"}]], " ", 
              SqrtBox[
               RowBox[{
                RowBox[{
                 RowBox[{"-", "4"}], " ", "kd", " ", "ki"}], "+", 
                SuperscriptBox[
                 RowBox[{"(", 
                  RowBox[{"ka", "+", "kd", "+", "ki"}], ")"}], "2"]}]]}]}], 
            ")"}]}], ")"}], "/", 
         RowBox[{"(", 
          RowBox[{"2", " ", "ki", " ", 
           SqrtBox[
            RowBox[{
             RowBox[{
              RowBox[{"-", "4"}], " ", "kd", " ", "ki"}], "+", 
             SuperscriptBox[
              RowBox[{"(", 
               RowBox[{"ka", "+", "kd", "+", "ki"}], ")"}], "2"]}]]}], 
          ")"}]}]}], ";", 
       RowBox[{"eqQeL", "=", 
        RowBox[{"Limit", "[", 
         RowBox[{"eqQe", ",", 
          RowBox[{"t", "\[Rule]", "Infinity"}]}], "]"}]}], ";", 
       "\[IndentingNewLine]", 
       RowBox[{"eqIe", "=", 
        RowBox[{
         RowBox[{"-", 
          FractionBox["1", 
           RowBox[{"2", " ", 
            SqrtBox[
             RowBox[{
              RowBox[{
               RowBox[{"-", "4"}], " ", "kd", " ", "ki"}], "+", 
              SuperscriptBox[
               RowBox[{"(", 
                RowBox[{"ka", "+", "kd", "+", "ki"}], ")"}], "2"]}]]}]]}], 
         "cEo", " ", 
         SuperscriptBox["\[ExponentialE]", 
          RowBox[{
           RowBox[{"-", 
            FractionBox["1", "2"]}], " ", "cAo", " ", 
           RowBox[{"(", 
            RowBox[{"ka", "+", "kd", "+", "ki", "+", 
             SqrtBox[
              RowBox[{
               RowBox[{
                RowBox[{"-", "4"}], " ", "kd", " ", "ki"}], "+", 
               SuperscriptBox[
                RowBox[{"(", 
                 RowBox[{"ka", "+", "kd", "+", "ki"}], ")"}], "2"]}]]}], 
            ")"}], " ", "t"}]], " ", 
         RowBox[{"(", 
          RowBox[{
           RowBox[{"-", "ka"}], "+", 
           RowBox[{
            SuperscriptBox["\[ExponentialE]", 
             RowBox[{"cAo", " ", 
              SqrtBox[
               RowBox[{
                RowBox[{
                 RowBox[{"-", "4"}], " ", "kd", " ", "ki"}], "+", 
                SuperscriptBox[
                 RowBox[{"(", 
                  RowBox[{"ka", "+", "kd", "+", "ki"}], ")"}], "2"]}]], " ", 
              "t"}]], " ", "ka"}], "-", "kd", "+", 
           RowBox[{
            SuperscriptBox["\[ExponentialE]", 
             RowBox[{"cAo", " ", 
              SqrtBox[
               RowBox[{
                RowBox[{
                 RowBox[{"-", "4"}], " ", "kd", " ", "ki"}], "+", 
                SuperscriptBox[
                 RowBox[{"(", 
                  RowBox[{"ka", "+", "kd", "+", "ki"}], ")"}], "2"]}]], " ", 
              "t"}]], " ", "kd"}], "+", "ki", "-", 
           RowBox[{
            SuperscriptBox["\[ExponentialE]", 
             RowBox[{"cAo", " ", 
              SqrtBox[
               RowBox[{
                RowBox[{
                 RowBox[{"-", "4"}], " ", "kd", " ", "ki"}], "+", 
                SuperscriptBox[
                 RowBox[{"(", 
                  RowBox[{"ka", "+", "kd", "+", "ki"}], ")"}], "2"]}]], " ", 
              "t"}]], " ", "ki"}], "+", 
           SqrtBox[
            RowBox[{
             RowBox[{
              RowBox[{"-", "4"}], " ", "kd", " ", "ki"}], "+", 
             SuperscriptBox[
              RowBox[{"(", 
               RowBox[{"ka", "+", "kd", "+", "ki"}], ")"}], "2"]}]], "+", 
           RowBox[{
            SuperscriptBox["\[ExponentialE]", 
             RowBox[{"cAo", " ", 
              SqrtBox[
               RowBox[{
                RowBox[{
                 RowBox[{"-", "4"}], " ", "kd", " ", "ki"}], "+", 
                SuperscriptBox[
                 RowBox[{"(", 
                  RowBox[{"ka", "+", "kd", "+", "ki"}], ")"}], "2"]}]], " ", 
              "t"}]], " ", 
            SqrtBox[
             RowBox[{
              RowBox[{
               RowBox[{"-", "4"}], " ", "kd", " ", "ki"}], "+", 
              SuperscriptBox[
               RowBox[{"(", 
                RowBox[{"ka", "+", "kd", "+", "ki"}], ")"}], "2"]}]]}], "-", 
           RowBox[{"2", " ", 
            SuperscriptBox["\[ExponentialE]", 
             RowBox[{
              FractionBox["1", "2"], " ", "cAo", " ", 
              RowBox[{"(", 
               RowBox[{"ka", "+", "kd", "+", "ki", "+", 
                SqrtBox[
                 RowBox[{
                  RowBox[{
                   RowBox[{"-", "4"}], " ", "kd", " ", "ki"}], "+", 
                  SuperscriptBox[
                   RowBox[{"(", 
                    RowBox[{"ka", "+", "kd", "+", "ki"}], ")"}], "2"]}]]}], 
               ")"}], " ", "t"}]], " ", 
            SqrtBox[
             RowBox[{
              RowBox[{
               RowBox[{"-", "4"}], " ", "kd", " ", "ki"}], "+", 
              SuperscriptBox[
               RowBox[{"(", 
                RowBox[{"ka", "+", "kd", "+", "ki"}], ")"}], "2"]}]]}]}], ")"}
          ]}]}], ";", "\[IndentingNewLine]", 
       RowBox[{"eqIeL", "=", 
        RowBox[{"Limit", "[", 
         RowBox[{"eqIe", ",", 
          RowBox[{"t", "\[Rule]", "Infinity"}]}], "]"}]}], ";", 
       "\[IndentingNewLine]", 
       RowBox[{"eqEe", "=", 
        RowBox[{
         FractionBox["1", 
          RowBox[{"2", " ", 
           SqrtBox[
            RowBox[{
             RowBox[{
              RowBox[{"-", "4"}], " ", "kd", " ", "ki"}], "+", 
             SuperscriptBox[
              RowBox[{"(", 
               RowBox[{"ka", "+", "kd", "+", "ki"}], ")"}], "2"]}]]}]], "cEo",
          " ", 
         SuperscriptBox["\[ExponentialE]", 
          RowBox[{
           RowBox[{"-", 
            FractionBox["1", "2"]}], " ", "cAo", " ", 
           RowBox[{"(", 
            RowBox[{"ka", "+", "kd", "+", "ki", "+", 
             SqrtBox[
              RowBox[{
               RowBox[{
                RowBox[{"-", "4"}], " ", "kd", " ", "ki"}], "+", 
               SuperscriptBox[
                RowBox[{"(", 
                 RowBox[{"ka", "+", "kd", "+", "ki"}], ")"}], "2"]}]]}], 
            ")"}], " ", "t"}]], " ", 
         RowBox[{"(", 
          RowBox[{"ka", "-", 
           RowBox[{
            SuperscriptBox["\[ExponentialE]", 
             RowBox[{"cAo", " ", 
              SqrtBox[
               RowBox[{
                RowBox[{
                 RowBox[{"-", "4"}], " ", "kd", " ", "ki"}], "+", 
                SuperscriptBox[
                 RowBox[{"(", 
                  RowBox[{"ka", "+", "kd", "+", "ki"}], ")"}], "2"]}]], " ", 
              "t"}]], " ", "ka"}], "-", "kd", "+", 
           RowBox[{
            SuperscriptBox["\[ExponentialE]", 
             RowBox[{"cAo", " ", 
              SqrtBox[
               RowBox[{
                RowBox[{
                 RowBox[{"-", "4"}], " ", "kd", " ", "ki"}], "+", 
                SuperscriptBox[
                 RowBox[{"(", 
                  RowBox[{"ka", "+", "kd", "+", "ki"}], ")"}], "2"]}]], " ", 
              "t"}]], " ", "kd"}], "+", "ki", "-", 
           RowBox[{
            SuperscriptBox["\[ExponentialE]", 
             RowBox[{"cAo", " ", 
              SqrtBox[
               RowBox[{
                RowBox[{
                 RowBox[{"-", "4"}], " ", "kd", " ", "ki"}], "+", 
                SuperscriptBox[
                 RowBox[{"(", 
                  RowBox[{"ka", "+", "kd", "+", "ki"}], ")"}], "2"]}]], " ", 
              "t"}]], " ", "ki"}], "+", 
           SqrtBox[
            RowBox[{
             RowBox[{
              RowBox[{"-", "4"}], " ", "kd", " ", "ki"}], "+", 
             SuperscriptBox[
              RowBox[{"(", 
               RowBox[{"ka", "+", "kd", "+", "ki"}], ")"}], "2"]}]], "+", 
           RowBox[{
            SuperscriptBox["\[ExponentialE]", 
             RowBox[{"cAo", " ", 
              SqrtBox[
               RowBox[{
                RowBox[{
                 RowBox[{"-", "4"}], " ", "kd", " ", "ki"}], "+", 
                SuperscriptBox[
                 RowBox[{"(", 
                  RowBox[{"ka", "+", "kd", "+", "ki"}], ")"}], "2"]}]], " ", 
              "t"}]], " ", 
            SqrtBox[
             RowBox[{
              RowBox[{
               RowBox[{"-", "4"}], " ", "kd", " ", "ki"}], "+", 
              SuperscriptBox[
               RowBox[{"(", 
                RowBox[{"ka", "+", "kd", "+", "ki"}], ")"}], "2"]}]]}]}], 
          ")"}]}]}], ";", "\[IndentingNewLine]", 
       RowBox[{"eqFe", "=", 
        FractionBox[
         RowBox[{"cEo", " ", 
          SuperscriptBox["\[ExponentialE]", 
           RowBox[{
            RowBox[{"-", 
             FractionBox["1", "2"]}], " ", "cAo", " ", 
            RowBox[{"(", 
             RowBox[{"ka", "+", "kd", "+", "ki", "+", 
              SqrtBox[
               RowBox[{
                RowBox[{
                 RowBox[{"-", "4"}], " ", "kd", " ", "ki"}], "+", 
                SuperscriptBox[
                 RowBox[{"(", 
                  RowBox[{"ka", "+", "kd", "+", "ki"}], ")"}], "2"]}]]}], 
             ")"}], " ", "t"}]], " ", 
          RowBox[{"(", 
           RowBox[{
            RowBox[{"-", "1"}], "+", 
            SuperscriptBox["\[ExponentialE]", 
             RowBox[{"cAo", " ", 
              SqrtBox[
               RowBox[{
                RowBox[{
                 RowBox[{"-", "4"}], " ", "kd", " ", "ki"}], "+", 
                SuperscriptBox[
                 RowBox[{"(", 
                  RowBox[{"ka", "+", "kd", "+", "ki"}], ")"}], "2"]}]], " ", 
              "t"}]]}], ")"}], " ", "ka"}], 
         SqrtBox[
          RowBox[{
           RowBox[{
            RowBox[{"-", "4"}], " ", "kd", " ", "ki"}], "+", 
           SuperscriptBox[
            RowBox[{"(", 
             RowBox[{"ka", "+", "kd", "+", "ki"}], ")"}], "2"]}]]]}], ";", 
       "\[IndentingNewLine]", 
       RowBox[{"plot1", "=", 
        RowBox[{"Plot", "[", 
         RowBox[{
          RowBox[{"{", 
           RowBox[{"eqPe", ",", 
            RowBox[{"eqPeL", ";", "eqQe"}], ",", "eqQeL"}], "}"}], ",", 
          RowBox[{"{", 
           RowBox[{"t", ",", "0.0", ",", "250"}], "}"}], ",", 
          "\[IndentingNewLine]", 
          RowBox[{"Evaluate", "@", "PingPongModel1"}], ",", 
          "\[IndentingNewLine]", 
          RowBox[{"PlotStyle", "\[Rule]", 
           RowBox[{"{", 
            RowBox[{
             RowBox[{"{", 
              RowBox[{"Thick", ",", 
               RowBox[{"Darker", "[", "Green", "]"}]}], "}"}], ",", 
             RowBox[{"{", 
              RowBox[{"Thick", ",", "Pink"}], "}"}], ",", 
             RowBox[{"{", 
              RowBox[{"Black", ",", "Dashed"}], "}"}]}], "}"}]}], ",", 
          "\[IndentingNewLine]", 
          RowBox[{"Epilog", "\[Rule]", 
           RowBox[{"{", 
            RowBox[{
             RowBox[{"Inset", "[", 
              RowBox[{
               RowBox[{"Style", "[", 
                RowBox[{
                "\"\<[P\!\(\*SubscriptBox[\(]\), \(E\)]\)\>\"", ",", "12", 
                 ",", 
                 RowBox[{"Background", "\[Rule]", "White"}]}], "]"}], ",", 
               RowBox[{"{", 
                RowBox[{"100", ",", 
                 RowBox[{
                  RowBox[{"0.3", "+", "eqPe"}], "/.", 
                  RowBox[{"t", "\[Rule]", "100"}]}]}], "}"}]}], "]"}], ",", 
             "\[IndentingNewLine]", 
             RowBox[{"Inset", "[", 
              RowBox[{
               RowBox[{"Style", "[", 
                RowBox[{
                "\"\<[Q\!\(\*SubscriptBox[\(]\), \(E\)]\)\>\"", ",", "12", 
                 ",", 
                 RowBox[{"Background", "\[Rule]", "White"}]}], "]"}], ",", 
               RowBox[{"{", 
                RowBox[{"50", ",", 
                 RowBox[{
                  RowBox[{
                   RowBox[{"-", "0.5"}], "+", "eqQe"}], "/.", 
                  RowBox[{"t", "\[Rule]", "50"}]}]}], "}"}]}], "]"}]}], 
            "\[IndentingNewLine]", "}"}]}]}], "]"}]}], ";", 
       "\[IndentingNewLine]", 
       RowBox[{"plot2", "=", 
        RowBox[{"Plot", "[", 
         RowBox[{
          RowBox[{"{", 
           RowBox[{"eqEe", ",", "eqFe", ",", "eqIe", ",", "eqIeL"}], "}"}], 
          ",", 
          RowBox[{"{", 
           RowBox[{"t", ",", "0", ",", "250"}], "}"}], ",", 
          "\[IndentingNewLine]", 
          RowBox[{"Evaluate", "@", "PingPongModel1"}], ",", 
          "\[IndentingNewLine]", 
          RowBox[{"PlotStyle", "\[Rule]", 
           RowBox[{"{", 
            RowBox[{
             RowBox[{"{", 
              RowBox[{"Thick", ",", "Blue"}], "}"}], ",", 
             RowBox[{"{", 
              RowBox[{"Thick", ",", "Brown"}], "}"}], ",", 
             RowBox[{"{", 
              RowBox[{"Thick", ",", "Green"}], "}"}], ",", 
             RowBox[{"{", 
              RowBox[{"Thick", ",", "Black", ",", "Dashed"}], "}"}]}], 
            "}"}]}], ",", "\[IndentingNewLine]", 
          RowBox[{"Epilog", "\[Rule]", 
           RowBox[{"{", 
            RowBox[{
             RowBox[{"Inset", "[", 
              RowBox[{
               RowBox[{"Style", "[", 
                RowBox[{
                "\"\<[E\!\(\*SubscriptBox[\(]\), \(E\)]\)\>\"", ",", "12", 
                 ",", 
                 RowBox[{"Background", "\[Rule]", "White"}]}], "]"}], ",", 
               RowBox[{"{", 
                RowBox[{"20", ",", 
                 RowBox[{"eqEe", "/.", 
                  RowBox[{"t", "\[Rule]", "3"}]}]}], "}"}]}], "]"}], ",", 
             "\[IndentingNewLine]", 
             RowBox[{"Inset", "[", 
              RowBox[{
               RowBox[{"Style", "[", 
                RowBox[{
                "\"\<[F\!\(\*SubscriptBox[\(]\), \(E\)]\)\>\"", ",", "12", 
                 ",", 
                 RowBox[{"Background", "\[Rule]", "White"}]}], "]"}], ",", 
               RowBox[{"{", 
                RowBox[{"100", ",", 
                 RowBox[{
                  RowBox[{"0.1", "+", "eqFe"}], "/.", 
                  RowBox[{"t", "\[Rule]", "100"}]}]}], "}"}]}], "]"}], ",", 
             "\[IndentingNewLine]", 
             RowBox[{"Inset", "[", 
              RowBox[{
               RowBox[{"Style", "[", 
                RowBox[{
                "\"\<[I\!\(\*SubscriptBox[\(]\), \(E\)]\)\>\"", ",", "12", 
                 ",", 
                 RowBox[{"Background", "\[Rule]", "White"}]}], "]"}], ",", 
               RowBox[{"{", 
                RowBox[{"150", ",", 
                 RowBox[{
                  RowBox[{"0.08", "+", "eqIe"}], "/.", 
                  RowBox[{"t", "\[Rule]", "150"}]}]}], "}"}]}], "]"}]}], 
            "\[IndentingNewLine]", "}"}]}]}], "]"}]}], ";", 
       "\[IndentingNewLine]", 
       RowBox[{"Pane", "[", "\[IndentingNewLine]", 
        RowBox[{
         RowBox[{"Switch", "[", 
          RowBox[{"PingPong", ",", "\[IndentingNewLine]", "1", ",", 
           RowBox[{"Show", "[", "plot1", "]"}], ",", "\[IndentingNewLine]", 
           "2", ",", 
           RowBox[{"Show", "[", "plot2", "]"}]}], "\[IndentingNewLine]", 
          "]"}], ",", 
         RowBox[{"ImageSize", "\[Rule]", 
          RowBox[{"1.2", 
           RowBox[{"{", 
            RowBox[{"480", ",", "310"}], "}"}]}]}]}], "]"}]}]}], "]"}], ",", 
    "\[IndentingNewLine]", 
    RowBox[{"Row", "[", 
     RowBox[{"{", "\[IndentingNewLine]", 
      RowBox[{
       RowBox[{"Column", "[", 
        RowBox[{"{", "\[IndentingNewLine]", "\[IndentingNewLine]", 
         RowBox[{
          RowBox[{"Style", "[", 
           RowBox[{"\"\<REACTANTS CONCENTRATIONS:\>\"", ",", "Bold"}], "]"}], 
          ",", "\[IndentingNewLine]", 
          RowBox[{"Control", "@", 
           RowBox[{"{", 
            RowBox[{
             RowBox[{"{", 
              RowBox[{
              "cAo", ",", "5", ",", 
               "\"\<[A\!\(\*SubscriptBox[\(]\), \
\(0\)]\),\!\(\*FormBox[RowBox[{\" \", RowBox[{\"mol\", \" \", \
SuperscriptBox[RowBox[{StyleBox[\"m\",FontSlant->\"Plain\"], \" \"}], \
RowBox[{\"\[Dash]\", \"3\"}]]}]}],TraditionalForm]\)\>\""}], "}"}], ",", 
             "0.1", ",", "10", ",", 
             RowBox[{"Appearance", "\[Rule]", "\"\<Labeled\>\""}]}], "}"}]}], 
          ",", "\[IndentingNewLine]", 
          RowBox[{"Control", "@", 
           RowBox[{"{", 
            RowBox[{
             RowBox[{"{", 
              RowBox[{
              "cEo", ",", "1", ",", 
               "\"\<[E\!\(\*SubscriptBox[\(]\), \
\(0\)]\),\!\(\*FormBox[RowBox[{\" \", RowBox[{\"mol\", \" \", \
SuperscriptBox[RowBox[{StyleBox[\"m\",FontSlant->\"Plain\"], \" \"}], \
RowBox[{\"\[Dash]\", \"3\"}]]}]}],TraditionalForm]\)\>\""}], "}"}], ",", 
             "0.1", ",", "2", ",", 
             RowBox[{"Appearance", "\[Rule]", "\"\<Labeled\>\""}]}], "}"}]}], 
          ",", "\[IndentingNewLine]", 
          RowBox[{"Control", "@", 
           RowBox[{"{", 
            RowBox[{
             RowBox[{"{", 
              RowBox[{
              "cFo", ",", "0", ",", 
               "\"\<[F\!\(\*SubscriptBox[\(]\), \
\(0\)]\),\!\(\*FormBox[RowBox[{\" \", RowBox[{\"mol\", \" \", \
SuperscriptBox[RowBox[{StyleBox[\"m\",FontSlant->\"Plain\"], \" \"}], \
RowBox[{\"\[Dash]\", \"3\"}]]}]}],TraditionalForm]\)\>\""}], "}"}], ",", "0", 
             ",", "0", ",", 
             RowBox[{"Appearance", "\[Rule]", "\"\<Labeled\>\""}]}], "}"}]}], 
          ",", "\[IndentingNewLine]", 
          RowBox[{"Control", "@", 
           RowBox[{"{", 
            RowBox[{
             RowBox[{"{", 
              RowBox[{
              "cPo", ",", "0", ",", 
               "\"\<[P\!\(\*SubscriptBox[\(]\), \
\(0\)]\),\!\(\*FormBox[RowBox[{\" \", RowBox[{\"mol\", \" \", \
SuperscriptBox[RowBox[{StyleBox[\"m\",FontSlant->\"Plain\"], \" \"}], \
RowBox[{\"\[Dash]\", \"3\"}]]}]}],TraditionalForm]\)\>\""}], "}"}], ",", "0", 
             ",", "0", ",", 
             RowBox[{"Appearance", "\[Rule]", "\"\<Labeled\>\""}]}], "}"}]}], 
          ",", "\[IndentingNewLine]", 
          RowBox[{"Control", "@", 
           RowBox[{"{", 
            RowBox[{
             RowBox[{"{", 
              RowBox[{
              "cQo", ",", "0", ",", 
               "\"\<[Q\!\(\*SubscriptBox[\(]\), \
\(0\)]\),\!\(\*FormBox[RowBox[{\" \", RowBox[{\"mol\", \" \", \
SuperscriptBox[RowBox[{StyleBox[\"m\",FontSlant->\"Plain\"], \" \"}], \
RowBox[{\"\[Dash]\", \"3\"}]]}]}],TraditionalForm]\)\>\""}], "}"}], ",", "0", 
             ",", "0", ",", 
             RowBox[{"Appearance", "\[Rule]", "\"\<Labeled\>\""}]}], "}"}]}], 
          ",", "\[IndentingNewLine]", 
          RowBox[{"Control", "@", 
           RowBox[{"{", 
            RowBox[{
             RowBox[{"{", 
              RowBox[{
              "cIo", ",", "0", ",", 
               "\"\<[I\!\(\*SubscriptBox[\(]\), \
\(0\)]\),\!\(\*FormBox[RowBox[{\" \", RowBox[{\"mol\", \" \", \
SuperscriptBox[RowBox[{StyleBox[\"m\",FontSlant->\"Plain\"], \" \"}], \
RowBox[{\"\[Dash]\", \"3\"}]]}]}],TraditionalForm]\)\>\""}], "}"}], ",", "0", 
             ",", "0", ",", 
             RowBox[{"Appearance", "\[Rule]", "\"\<Labeled\>\""}]}], 
            "}"}]}]}], "\[IndentingNewLine]", "}"}], "]"}], ",", 
       "\[IndentingNewLine]", 
       RowBox[{"Column", "[", 
        RowBox[{"{", "\[IndentingNewLine]", "\[IndentingNewLine]", 
         RowBox[{
          RowBox[{"Style", "[", 
           RowBox[{"\"\<RATE CONSTANTS:\>\"", ",", "Bold"}], "]"}], ",", 
          "\[IndentingNewLine]", 
          RowBox[{"Control", "@", 
           RowBox[{"{", 
            RowBox[{
             RowBox[{"{", 
              RowBox[{
              "ka", ",", "0.02", ",", 
               "\"\<\!\(\*SubscriptBox[StyleBox[\"k\",FontSlant->\"Italic\"], \
\"a\"]\), \
\!\(\*FormBox[RowBox[{SuperscriptBox[StyleBox[\"s\",FontSlant->\"Plain\"], \
RowBox[{\"\[Dash]\", \"1\"}]], \" \", SuperscriptBox[\"mol\", RowBox[{\"\
\[Dash]\", \"1\"}]], \" \", \
SuperscriptBox[StyleBox[\"m\",FontSlant->\"Plain\"], \
\"3\"]}],TraditionalForm]\)\>\""}], "}"}], ",", "0.001", ",", "0.04", ",", 
             RowBox[{"Appearance", "\[Rule]", "\"\<Labeled\>\""}]}], "}"}]}], 
          ",", "\[IndentingNewLine]", 
          RowBox[{"Control", "@", 
           RowBox[{"{", 
            RowBox[{
             RowBox[{"{", 
              RowBox[{
              "kd", ",", "0.015", ",", 
               "\"\<\!\(\*SubscriptBox[StyleBox[\"k\",FontSlant->\"Italic\"], \
\"d\"]\), \
\!\(\*FormBox[RowBox[{SuperscriptBox[StyleBox[\"s\",FontSlant->\"Plain\"], \
RowBox[{\"\[Dash]\", \"1\"}]], \" \", SuperscriptBox[\"mol\", RowBox[{\"\
\[Dash]\", \"1\"}]], \" \", \
SuperscriptBox[StyleBox[\"m\",FontSlant->\"Plain\"], \
\"3\"]}],TraditionalForm]\)\>\""}], "}"}], ",", "0.001", ",", "0.03", ",", 
             RowBox[{"Appearance", "\[Rule]", "\"\<Labeled\>\""}]}], "}"}]}], 
          ",", "\[IndentingNewLine]", 
          RowBox[{"Control", "@", 
           RowBox[{"{", 
            RowBox[{
             RowBox[{"{", 
              RowBox[{
              "ki", ",", "0.005", ",", 
               "\"\<\!\(\*SubscriptBox[StyleBox[\"k\",FontSlant->\"Italic\"], \
\"i\"]\), \
\!\(\*FormBox[RowBox[{SuperscriptBox[StyleBox[\"s\",FontSlant->\"Plain\"], \
RowBox[{\"\[Dash]\", \"1\"}]], \" \", SuperscriptBox[\"mol\", RowBox[{\"\
\[Dash]\", \"1\"}]], \" \", \
SuperscriptBox[StyleBox[\"m\",FontSlant->\"Plain\"], \
\"3\"]}],TraditionalForm]\)\>\""}], "}"}], ",", "0.001", ",", "0.01", ",", 
             RowBox[{"Appearance", "\[Rule]", "\"\<Labeled\>\""}]}], 
            "}"}]}]}], "\[IndentingNewLine]", "}"}], "]"}], ",", 
       "\[IndentingNewLine]", 
       RowBox[{"Control", "@", 
        RowBox[{"{", 
         RowBox[{
          RowBox[{"{", 
           RowBox[{"PingPong", ",", "1", ",", "\"\<Panel\>\""}], "}"}], ",", 
          RowBox[{"{", "\[IndentingNewLine]", 
           RowBox[{
            RowBox[{"1", "\[Rule]", "\"\<A\>\""}], ",", "\[IndentingNewLine]", 
            RowBox[{"2", "\[Rule]", "\"\<C\>\""}]}], "\[IndentingNewLine]", 
           "}"}], ",", 
          RowBox[{"ControlType", "\[Rule]", "Setter"}]}], "}"}]}]}], "}"}], 
     "]"}]}], "\[IndentingNewLine]", "]"}], "\[IndentingNewLine]"}]], "Input",
 CellChangeTimes->{{3.841749732856798*^9, 3.841749906918338*^9}, {
   3.841750053788534*^9, 3.8417500568715334`*^9}, {3.8418036925935926`*^9, 
   3.841803706752474*^9}, {3.8418037607203846`*^9, 3.841803774188929*^9}, {
   3.8418038073567395`*^9, 3.8418038499275484`*^9}, 3.841803904405038*^9, {
   3.8418053228201857`*^9, 3.841805323938447*^9}, {3.841805430221315*^9, 
   3.841805430784861*^9}, {3.8418056712220964`*^9, 3.8418056725014286`*^9}, {
   3.841836424378595*^9, 3.8418364269817724`*^9}, {3.8418867914336452`*^9, 
   3.841886853106645*^9}, {3.841886891238326*^9, 3.8418869414298725`*^9}, {
   3.8418871779836135`*^9, 3.8418871986816463`*^9}, {3.8418872411875305`*^9, 
   3.841887251013095*^9}, {3.84188731368587*^9, 3.8418873297914915`*^9}, {
   3.8418874752412233`*^9, 3.8418874765690117`*^9}, 3.8418875913857713`*^9, {
   3.841887944680502*^9, 3.841888206986114*^9}, {3.8418882799062786`*^9, 
   3.8418882862487326`*^9}, {3.8418883519361906`*^9, 3.841888407829341*^9}, {
   3.8418884538187127`*^9, 3.8418884964492006`*^9}, {3.8420104553380365`*^9, 
   3.842010456105392*^9}, {3.842010501475397*^9, 3.8420105017222424`*^9}, 
   3.8420105393949304`*^9, {3.8466571293324575`*^9, 3.8466571443435946`*^9}, {
   3.846657370778998*^9, 3.8466574869332204`*^9}, {3.846657601401836*^9, 
   3.846657689884245*^9}, 3.846658199217289*^9, {3.8466582422685738`*^9, 
   3.8466583553051624`*^9}, {3.8466583890306325`*^9, 3.846658445869364*^9}, {
   3.8466587017050686`*^9, 3.846658727875573*^9}, {3.8466589044445233`*^9, 
   3.846658923562812*^9}, {3.8466590107398157`*^9, 3.846659080311597*^9}, {
   3.846659127976855*^9, 3.846659128101828*^9}, {3.8466591912168427`*^9, 
   3.8466592481487646`*^9}, {3.8466594766550484`*^9, 3.846659533599231*^9}, {
   3.84665958437168*^9, 3.846659863675767*^9}, {3.8466598938799286`*^9, 
   3.846660059514933*^9}, {3.846669158921476*^9, 3.846669160540101*^9}, {
   3.846669210254387*^9, 3.8466695226397595`*^9}, {3.8466696739300594`*^9, 
   3.846669700555784*^9}, {3.846669733667065*^9, 3.846669830943153*^9}, {
   3.846669942941931*^9, 3.846669970183852*^9}, {3.8466700023530407`*^9, 
   3.846670003337158*^9}, {3.846670285534099*^9, 3.8466702962801914`*^9}, 
   3.846670457513308*^9, {3.846670500562671*^9, 3.8466705275347214`*^9}, {
   3.8466707719949465`*^9, 3.8466708730671043`*^9}, {3.8466709531558485`*^9, 
   3.8466710349452095`*^9}, {3.8466710720817604`*^9, 3.84667111103518*^9}, {
   3.8466711412342763`*^9, 3.8466712050839252`*^9}, {3.846671240711611*^9, 
   3.846671300266326*^9}, {3.846671342372938*^9, 3.8466714524283266`*^9}, {
   3.8466715047371726`*^9, 3.846671713659568*^9}, {3.8466722931171083`*^9, 
   3.8466723395722675`*^9}, 3.846672384048112*^9, {3.846739969188094*^9, 
   3.846739972171768*^9}, 3.846745658041407*^9, 3.846746398433676*^9, {
   3.846764496223112*^9, 3.846764552952351*^9}, {3.8472766347056165`*^9, 
   3.847276669849394*^9}, {3.847276713138187*^9, 3.847276721757236*^9}, {
   3.8472770823160067`*^9, 3.8472771436873293`*^9}, {3.847277313528089*^9, 
   3.8472773203345337`*^9}, {3.847277416301323*^9, 3.8472774310812693`*^9}, {
   3.8472774750157623`*^9, 3.847277479177511*^9}, {3.8472775316318893`*^9, 
   3.8472775758940177`*^9}, {3.8472776543078303`*^9, 
   3.8472776815826125`*^9}, {3.8472820829125304`*^9, 3.847282101713642*^9}, {
   3.847282202644628*^9, 3.8472822104353604`*^9}, {3.847282267459462*^9, 
   3.847282310564173*^9}, {3.8472823596584167`*^9, 3.847282370012159*^9}, {
   3.84728242923578*^9, 3.847282460379707*^9}, 3.8472825661218014`*^9, {
   3.847282602620706*^9, 3.847282614768936*^9}, {3.847335149022919*^9, 
   3.8473351951998057`*^9}, {3.847335255588388*^9, 3.8473352622853622`*^9}, 
   3.847335299620603*^9, {3.847335579443143*^9, 3.847335608350524*^9}, {
   3.8473356424322844`*^9, 3.84733571358677*^9}, {3.8473357501219473`*^9, 
   3.8473359066759663`*^9}, {3.847336046522848*^9, 3.847336053503533*^9}, {
   3.8473361964772964`*^9, 3.847336200021795*^9}, {3.8473362736531377`*^9, 
   3.847336288747509*^9}, {3.8473481034081535`*^9, 3.8473481111240797`*^9}, {
   3.848382018287554*^9, 3.8483820505924406`*^9}, {3.8483820856130686`*^9, 
   3.8483821106696844`*^9}, {3.848382145520816*^9, 3.8483821466143074`*^9}, 
   3.848382193853175*^9, {3.8483823158244123`*^9, 3.8483823864694166`*^9}, {
   3.8483824661294794`*^9, 3.848382489858067*^9}, {3.848382561091242*^9, 
   3.848382564293646*^9}, {3.851685314669648*^9, 3.8516853345712028`*^9}, {
   3.851685467649209*^9, 3.8516855020422287`*^9}, {3.8516869238465166`*^9, 
   3.85168695982136*^9}, {3.8516872104938073`*^9, 3.8516872120405083`*^9}, {
   3.851687248756606*^9, 3.8516872707514334`*^9}, {3.8516878641505013`*^9, 
   3.8516880498282366`*^9}, {3.8516882835180893`*^9, 3.851688291032139*^9}, {
   3.851688381385642*^9, 3.85168840174336*^9}, {3.851688516903908*^9, 
   3.8516885512922974`*^9}, 3.8516888509872847`*^9, {3.8516890734305644`*^9, 
   3.8516890753207664`*^9}, 3.8517484648140383`*^9, {3.8517485281857347`*^9, 
   3.8517485619332514`*^9}, 3.8517486580512123`*^9, {3.8517513588686676`*^9, 
   3.8517514073309526`*^9}, {3.851751441541626*^9, 3.851751533068022*^9}, {
   3.851751605597808*^9, 3.851751650071472*^9}, {3.851751914649771*^9, 
   3.8517519306772113`*^9}, {3.8517539209566264`*^9, 3.851753921518944*^9}, {
   3.8517540049156313`*^9, 3.851754040623369*^9}, {3.8517541342577877`*^9, 
   3.851754134913883*^9}, {3.851755580791625*^9, 3.851755632282189*^9}, {
   3.85175566732077*^9, 3.85175576897163*^9}, {3.8517559092694125`*^9, 
   3.8517560125106993`*^9}, {3.851756148759842*^9, 3.8517561999442496`*^9}, {
   3.8517562786755133`*^9, 3.85175632121237*^9}, {3.85175638008928*^9, 
   3.8517564265781727`*^9}, {3.851756473982087*^9, 3.851756555509982*^9}, {
   3.8517565928446894`*^9, 3.851756625102707*^9}, {3.8517567124475203`*^9, 
   3.8517567340361834`*^9}, {3.851756821984413*^9, 3.8517568226248865`*^9}, {
   3.851756969730645*^9, 3.851757070910103*^9}, {3.851757110244399*^9, 
   3.851757111275406*^9}, {3.851757569353534*^9, 3.851757600992166*^9}, {
   3.851757676019738*^9, 3.85175767789157*^9}, {3.8517588302002554`*^9, 
   3.8517588878013997`*^9}, {3.851759072157569*^9, 3.85175907351406*^9}, {
   3.8517591552706633`*^9, 3.851759156705036*^9}, {3.851773137829807*^9, 
   3.851773169748623*^9}, {3.851773221229227*^9, 3.851773236357489*^9}, {
   3.8517733236279716`*^9, 3.8517733853129454`*^9}, {3.8517736188601284`*^9, 
   3.8517736258686404`*^9}, {3.8517737335668736`*^9, 3.851773738860039*^9}, 
   3.85177424731844*^9, {3.8517744746512675`*^9, 3.8517745447581444`*^9}, {
   3.851774585179755*^9, 3.851774618308499*^9}, {3.8517746807891307`*^9, 
   3.851774793080097*^9}, {3.851774873581607*^9, 3.8517749417219224`*^9}, {
   3.8517749856665754`*^9, 3.851775069507588*^9}, {3.8517774656545877`*^9, 
   3.851777466404437*^9}, {3.851777829092969*^9, 3.851777904166011*^9}, {
   3.8517781493109093`*^9, 3.8517782678252363`*^9}, {3.8517783179878016`*^9, 
   3.8517783821043415`*^9}, {3.85177841694917*^9, 3.851778454471308*^9}, {
   3.8517786093640203`*^9, 3.851778649402458*^9}, {3.851778683091739*^9, 
   3.851778693952546*^9}, 3.8517787333336506`*^9, {3.851778860073439*^9, 
   3.8517789122839394`*^9}, 3.851778952979082*^9, {3.8517791570067186`*^9, 
   3.8517791968098183`*^9}, {3.8517792312940693`*^9, 3.851779232715418*^9}, {
   3.8517792716194496`*^9, 3.851779379340855*^9}, {3.851779414021425*^9, 
   3.851779437226183*^9}, {3.8517794772943573`*^9, 3.8517795285549793`*^9}, 
   3.851779599409135*^9, {3.851947825131568*^9, 3.8519478397101264`*^9}, {
   3.8519479427752776`*^9, 3.851948080565038*^9}, {3.85194815725144*^9, 
   3.8519482112936525`*^9}, {3.8519482513071823`*^9, 3.851948300685818*^9}, {
   3.8519483467633505`*^9, 3.851948421926777*^9}, {3.854599917707138*^9, 
   3.854600013569354*^9}, {3.854712805139721*^9, 3.854712813811827*^9}, 
   3.85471512724292*^9, 3.8547154313136697`*^9, 3.854715541926668*^9, 
   3.854715944297141*^9, 3.8547754142715487`*^9, {3.8547755264962225`*^9, 
   3.8547755281675076`*^9}, {3.8547757270426426`*^9, 3.854775759334991*^9}, {
   3.8547757926492653`*^9, 3.85477579305542*^9}, {3.8547768647573757`*^9, 
   3.854776888796584*^9}, {3.8547769897774916`*^9, 3.854777019479389*^9}, {
   3.8547782128710985`*^9, 3.854778230252418*^9}, {3.8551982248697605`*^9, 
   3.855198277906287*^9}, {3.8551983360656457`*^9, 3.855198378165367*^9}, {
   3.855198503562776*^9, 3.855198531540599*^9}, {3.8551986228954463`*^9, 
   3.855198632533785*^9}, {3.8551987815217276`*^9, 3.855198791160095*^9}, {
   3.8552109863220525`*^9, 3.855210987618623*^9}, 3.855214762411118*^9, {
   3.856011846562994*^9, 3.856011846734826*^9}, 3.8560878091302457`*^9, 
   3.856087843090822*^9, {3.8560879184455433`*^9, 3.856087963059487*^9}, {
   3.8560880649683847`*^9, 3.856088202612194*^9}, 3.856088353238575*^9, {
   3.8560883909865675`*^9, 3.8560884115561733`*^9}, {3.8560884566794767`*^9, 
   3.856088466752247*^9}, {3.8560892251039495`*^9, 3.856089228351763*^9}, 
   3.8560897910955305`*^9, 3.856090309417139*^9, {3.8560904253453856`*^9, 
   3.8560904291870055`*^9}, {3.856091411499737*^9, 3.8560914171155396`*^9}, 
   3.8560914677276793`*^9, {3.8560929829811707`*^9, 3.8560930025763435`*^9}, {
   3.856093034916766*^9, 3.856093040136408*^9}, 3.8560936656415873`*^9, {
   3.8560946746845627`*^9, 3.8560947386523623`*^9}, 3.8560948723914704`*^9, {
   3.8560949180506277`*^9, 3.8560949209652853`*^9}, {3.8560949813293114`*^9, 
   3.8560949895195255`*^9}, {3.856096770884041*^9, 3.8560967982143965`*^9}, {
   3.8562662119601536`*^9, 3.8562662387117453`*^9}, {3.8562662738353577`*^9, 
   3.85626634798162*^9}, {3.8562664068280306`*^9, 3.8562664493400946`*^9}, {
   3.856266491656769*^9, 3.8562665542320075`*^9}, {3.8562666093858414`*^9, 
   3.856266616914109*^9}, 3.8562666503855114`*^9, 3.856266731222801*^9, {
   3.8562667623716664`*^9, 3.856266763340187*^9}, {3.856266817889781*^9, 
   3.8562669903836803`*^9}, {3.856267028970646*^9, 3.8562674280048995`*^9}, {
   3.856267489320221*^9, 3.8562675036762*^9}, {3.8562675747686973`*^9, 
   3.85626772736058*^9}, {3.856268275993417*^9, 3.856268308782513*^9}, {
   3.8562683880938034`*^9, 3.8562684345515585`*^9}, {3.856268464669392*^9, 
   3.856268483055673*^9}, {3.856268600184104*^9, 3.8562686093384027`*^9}, {
   3.8562686627942486`*^9, 3.8562686713562837`*^9}, {3.856268715189642*^9, 
   3.85626872318774*^9}, {3.8562688858849354`*^9, 3.8562689033964076`*^9}, {
   3.8562689706460557`*^9, 3.8562689783161087`*^9}, {3.8562690119511585`*^9, 
   3.856269027838032*^9}, {3.8562692047059155`*^9, 3.8562692060962067`*^9}, {
   3.8562692889079857`*^9, 3.8562692982027073`*^9}, {3.856269339677191*^9, 
   3.856269382573267*^9}, {3.856269415565442*^9, 3.856269435654676*^9}, {
   3.8562694723563094`*^9, 3.856269557617446*^9}, {3.856269592702757*^9, 
   3.8562695966393237`*^9}, {3.8562697389401054`*^9, 3.856269757199979*^9}, {
   3.8562698668960752`*^9, 3.8562698804551315`*^9}, 3.8562699452694855`*^9, {
   3.8562700055975056`*^9, 3.856270024858776*^9}, 3.856270062059145*^9, {
   3.8562701015654116`*^9, 3.856270107938883*^9}, {3.8562708100480924`*^9, 
   3.856270885842801*^9}, 3.856270961293467*^9, {3.8562711191233764`*^9, 
   3.8562711470871487`*^9}, {3.8562711940291367`*^9, 
   3.8562712004963613`*^9}, {3.8562712551100063`*^9, 
   3.8562712731059637`*^9}, {3.856271326739816*^9, 3.856271327005192*^9}, 
   3.8562715582179365`*^9, {3.85635050737883*^9, 3.8563505384237394`*^9}, {
   3.8563507814405966`*^9, 3.8563508153988123`*^9}, {3.856403365288825*^9, 
   3.8564033725059032`*^9}, 3.8564034328061533`*^9, {3.856403677833009*^9, 
   3.8564036865653663`*^9}, 3.856403890866742*^9, {3.8564041266115713`*^9, 
   3.8564041422014694`*^9}, 3.8564041731184883`*^9, {3.856416050425877*^9, 
   3.8564160637664623`*^9}, {3.856416280935495*^9, 3.856416287355866*^9}, {
   3.856416959202245*^9, 3.8564169628422403`*^9}, {3.8564170881878357`*^9, 
   3.8564170929365063`*^9}, {3.8564211371406746`*^9, 
   3.8564211381260867`*^9}, {3.8564928014670725`*^9, 3.856492889496597*^9}, {
   3.856524095346117*^9, 3.8565240968541727`*^9}, {3.856526117783168*^9, 
   3.8565261788118153`*^9}, {3.85652621576435*^9, 3.8565265851951265`*^9}, 
   3.856526620070896*^9, {3.856526784526054*^9, 3.8565268213945723`*^9}, {
   3.8565269261532445`*^9, 3.8565269428849173`*^9}, {3.856526976979076*^9, 
   3.8565270081579266`*^9}, {3.8565274901002035`*^9, 3.856527631927746*^9}, {
   3.856527863516915*^9, 3.8565279115252895`*^9}, {3.8565280059731197`*^9, 
   3.8565280360566626`*^9}, {3.856578441658614*^9, 3.856578534551834*^9}, {
   3.856578585867895*^9, 3.856578587367775*^9}, {3.856585965683324*^9, 
   3.8565860105322256`*^9}, {3.856586057710473*^9, 3.8565860875324173`*^9}, {
   3.8565861214307117`*^9, 3.8565861223055086`*^9}, {3.856586338754282*^9, 
   3.856586349314308*^9}, 3.8565863915700674`*^9, {3.8565864277972946`*^9, 
   3.856586432374343*^9}, {3.856586513006154*^9, 3.8565865462172213`*^9}, {
   3.856586596418406*^9, 3.8565865981225424`*^9}, {3.8565866327363014`*^9, 
   3.8565866953932867`*^9}, {3.856586749038932*^9, 3.8565867794206934`*^9}, {
   3.85658688255177*^9, 3.856587028079939*^9}, {3.8565871766644897`*^9, 
   3.8565872513246145`*^9}, {3.8565873136227427`*^9, 
   3.8565873291670866`*^9}, {3.8565887309515133`*^9, 3.856588756211442*^9}, {
   3.8565892154901934`*^9, 3.8565892174582577`*^9}, {3.8565892810851035`*^9, 
   3.856589283897182*^9}, {3.856589347928996*^9, 3.8565893769690905`*^9}, 
   3.856589426035511*^9, {3.8565894767330036`*^9, 3.8565894772485204`*^9}, {
   3.8565895348756146`*^9, 3.8565896370237446`*^9}, {3.856589689214632*^9, 
   3.856589701524059*^9}, {3.856589736890732*^9, 3.856589777513848*^9}, {
   3.8565898367499847`*^9, 3.8565898451230025`*^9}, 3.8565898894731035`*^9, 
   3.856590002805897*^9, {3.856592017735877*^9, 3.85659204763494*^9}, {
   3.8565921813769894`*^9, 3.8565922127916822`*^9}, {3.8565924177302074`*^9, 
   3.8565924678590455`*^9}, {3.856592652712386*^9, 3.8565926988109183`*^9}, {
   3.856592740863589*^9, 3.8565928621163926`*^9}, {3.8565928927810936`*^9, 
   3.856592991790041*^9}, {3.8565930288594637`*^9, 3.856593136661091*^9}, {
   3.856593175542596*^9, 3.856593200177582*^9}, {3.859442264177102*^9, 
   3.8594422655830455`*^9}, {3.859443283339403*^9, 3.8594432839486427`*^9}, {
   3.8595121493486705`*^9, 3.8595122032737083`*^9}, {3.8595123800832744`*^9, 
   3.859512381020519*^9}, {3.8595136832040634`*^9, 3.859513686656341*^9}, {
   3.859513731817624*^9, 3.859513775316301*^9}, {3.8595141104660487`*^9, 
   3.8595141203855877`*^9}, {3.859514164172135*^9, 3.8595141694209075`*^9}, {
   3.859514243050852*^9, 3.859514299396969*^9}, {3.8595143390907536`*^9, 
   3.8595143605874643`*^9}, {3.8625384755068703`*^9, 3.862538536724008*^9}, {
   3.8625386094660425`*^9, 3.862538617167386*^9}, {3.8625388421972065`*^9, 
   3.8625388824582276`*^9}, {3.862538961990213*^9, 3.8625390043737755`*^9}, {
   3.8625402542485604`*^9, 3.862540355121268*^9}, {3.86254038874047*^9, 
   3.8625405025421114`*^9}, {3.8625407842918663`*^9, 3.862540839394108*^9}, {
   3.862540881263324*^9, 3.862540893073165*^9}, {3.862540927072388*^9, 
   3.862540930727806*^9}, {3.862540968641368*^9, 3.862541039169713*^9}, {
   3.862541070337467*^9, 3.86254107308657*^9}, {3.8625411099326673`*^9, 
   3.8625411176963825`*^9}, {3.862542143627994*^9, 3.862542183308839*^9}, {
   3.8625422216633053`*^9, 3.862542297426545*^9}, {3.862542359566764*^9, 
   3.862542371454609*^9}, {3.8625424037534523`*^9, 3.862542406940213*^9}, {
   3.862542447000838*^9, 3.8625424796164*^9}, {3.8625425248786645`*^9, 
   3.862542531439411*^9}, {3.8625425627610855`*^9, 3.862542630851483*^9}, {
   3.862542665382303*^9, 3.86254270147784*^9}, {3.862542907144378*^9, 
   3.8625429127680635`*^9}, {3.8625429806914854`*^9, 
   3.8625429835501738`*^9}, {3.8625430696038723`*^9, 3.862543074758877*^9}, {
   3.8625431349380713`*^9, 3.862543170624033*^9}, {3.8625433043267984`*^9, 
   3.8625433721544313`*^9}, {3.8625462380859747`*^9, 
   3.8625462804766073`*^9}, {3.862546326902441*^9, 3.8625463519134946`*^9}, {
   3.862546387874991*^9, 3.8625464523033905`*^9}, {3.862546499916296*^9, 
   3.862546522812574*^9}, {3.862546565250599*^9, 3.862546576473459*^9}, {
   3.8625467141487494`*^9, 3.8625467297162733`*^9}, {3.862546759778901*^9, 
   3.862546760528902*^9}, {3.8625467918728175`*^9, 3.86254681377852*^9}, {
   3.862553312744037*^9, 3.862553313746666*^9}, {3.8625533549420877`*^9, 
   3.862553528945428*^9}, {3.8625539208002663`*^9, 3.8625540266363297`*^9}, 
   3.8625540714383073`*^9, {3.862554141651801*^9, 3.8625541649511375`*^9}, {
   3.8625542162144737`*^9, 3.8625542217790756`*^9}, {3.8625551645103245`*^9, 
   3.862555169946577*^9}, {3.8625552043128624`*^9, 3.86255520790518*^9}, {
   3.862555248115341*^9, 3.8625553038327913`*^9}, {3.8625555098346963`*^9, 
   3.862555510787594*^9}, {3.8625555490660896`*^9, 3.8625555711352673`*^9}, {
   3.8625557100715747`*^9, 3.862555732791067*^9}, {3.8625558938568363`*^9, 
   3.862555924485589*^9}, {3.86255606456581*^9, 3.8625560653156333`*^9}, {
   3.8625560958071027`*^9, 3.862556136342362*^9}, {3.8625561798617125`*^9, 
   3.8625561902428446`*^9}, {3.862556227911791*^9, 3.862556228489964*^9}, {
   3.862556260998291*^9, 3.862556261591903*^9}, {3.862556303627578*^9, 
   3.862556344911972*^9}, {3.8625563851927443`*^9, 3.862556406789442*^9}, {
   3.862564604930318*^9, 3.8625646111400957`*^9}, {3.8625646789992914`*^9, 
   3.8625647344469767`*^9}, {3.8625647702213507`*^9, 3.86256487720207*^9}, {
   3.8625649540259953`*^9, 3.862564963201209*^9}, {3.862565071521447*^9, 
   3.8625650775029535`*^9}, {3.8625651122344875`*^9, 
   3.8625651662166953`*^9}, {3.8625653088757715`*^9, 3.86256542968497*^9}, 
   3.8625657267274914`*^9, {3.8625665446554937`*^9, 3.8625666329827547`*^9}, 
   3.8625667125267243`*^9, {3.8625667581511793`*^9, 3.8625667874239864`*^9}, {
   3.862566832990642*^9, 3.8625669941478405`*^9}, {3.862567090538236*^9, 
   3.862567173928689*^9}, {3.862621425226452*^9, 3.8626214285715895`*^9}, {
   3.8626214612548943`*^9, 3.8626215368023434`*^9}, {3.862626017743286*^9, 
   3.8626260221172576`*^9}, {3.862626058108754*^9, 3.862626109471696*^9}, {
   3.862626201778087*^9, 3.8626262124630747`*^9}, {3.862626243004836*^9, 
   3.8626262856367955`*^9}, {3.862626317972968*^9, 3.862626325033801*^9}, 
   3.8626267050549016`*^9, 3.862627030860738*^9, {3.8626270996414213`*^9, 
   3.8626271044059258`*^9}, 3.862627150645014*^9, {3.8626271825750275`*^9, 
   3.8626272081783743`*^9}, {3.862627244794756*^9, 3.8626272706949096`*^9}, {
   3.8626273413464003`*^9, 3.8626273459442034`*^9}, {3.8626276310034323`*^9, 
   3.8626276341423635`*^9}, {3.862627676216652*^9, 3.862627680994155*^9}, {
   3.862627716784389*^9, 3.8626277320978537`*^9}, {3.8626279014517064`*^9, 
   3.86262801412446*^9}, {3.8626280506302385`*^9, 3.862628081105587*^9}, {
   3.862628138042556*^9, 3.8626281439863443`*^9}, 3.8626284430349245`*^9, {
   3.862628533070938*^9, 3.8626286716581426`*^9}, {3.862628721389906*^9, 
   3.862628732110755*^9}, {3.8626287667487636`*^9, 3.8626287771538982`*^9}, {
   3.862970902307664*^9, 3.862970908062416*^9}, {3.8629709833221073`*^9, 
   3.8629709846889577`*^9}, {3.875241638665234*^9, 3.8752417732649417`*^9}, {
   3.8752418450611753`*^9, 3.875241845761073*^9}, 3.8752418854853067`*^9, {
   3.875241933083778*^9, 3.8752419474110684`*^9}, {3.8752419844972787`*^9, 
   3.875242074814973*^9}, {3.8752421246354876`*^9, 3.8752421372902536`*^9}, {
   3.8752422505327044`*^9, 3.8752422966846075`*^9}, {3.8752423584097476`*^9, 
   3.875242400769598*^9}, {3.8752424390717816`*^9, 3.8752424479933076`*^9}, {
   3.875242729698488*^9, 3.875242878907241*^9}, {3.875243069492738*^9, 
   3.8752432985073013`*^9}, 3.8752433733781867`*^9, {3.875243405616886*^9, 
   3.8752434079262877`*^9}, {3.8752434642003756`*^9, 
   3.8752435215426273`*^9}, {3.875244076159387*^9, 3.8752442140197053`*^9}, {
   3.8752442664952407`*^9, 3.8752443422180076`*^9}, {3.875244383276721*^9, 
   3.87524440618211*^9}, {3.875244450958171*^9, 3.8752444515828347`*^9}, {
   3.875244490584245*^9, 3.8752445531918497`*^9}, {3.875244597896147*^9, 
   3.8752446019484024`*^9}, {3.875244771290536*^9, 3.8752447937719975`*^9}, {
   3.875244937030329*^9, 3.87524495192118*^9}, {3.8752449958521852`*^9, 
   3.8752450029053507`*^9}, {3.8752450425340075`*^9, 3.8752450667333393`*^9}, 
   3.875245097699538*^9, {3.8752451494252396`*^9, 3.875245181051627*^9}, {
   3.8752452164863806`*^9, 3.8752453380978546`*^9}, {3.875245373796278*^9, 
   3.8752454154861565`*^9}, {3.8752461352233067`*^9, 3.875246141426769*^9}, {
   3.8752462107362185`*^9, 3.8752462576314955`*^9}, {3.8752462971008973`*^9, 
   3.8752463282431965`*^9}, {3.87524636279326*^9, 3.875246398518362*^9}, {
   3.875407957584838*^9, 3.8754079653609133`*^9}, 3.875407998326603*^9, {
   3.8754081600243683`*^9, 3.875408274268155*^9}, {3.875408388030863*^9, 
   3.8754084201667147`*^9}, {3.87540846417231*^9, 3.8754085218891563`*^9}, {
   3.8754085885729756`*^9, 3.8754086414892645`*^9}, 3.8755363624146605`*^9, {
   3.8755365721727934`*^9, 3.8755366891452813`*^9}, 3.8755367954307566`*^9, 
   3.8755389027017665`*^9, {3.8755390042902203`*^9, 3.875539042568532*^9}},
 CellLabel->"In[5]:=",ExpressionUUID->"fcf08fdf-8ce7-405e-b8ba-c7eb263bf932"],

Cell[BoxData[
 TagBox[
  StyleBox[
   DynamicModuleBox[{$CellContext`cAo$$ = 5, $CellContext`cEo$$ = 
    1, $CellContext`cFo$$ = 0, $CellContext`cIo$$ = 0, $CellContext`cPo$$ = 
    0, $CellContext`cQo$$ = 0, $CellContext`ka$$ = 0.02, $CellContext`kd$$ = 
    0.015, $CellContext`ki$$ = 0.005, $CellContext`PingPong$$ = 1, 
    Typeset`show$$ = True, Typeset`bookmarkList$$ = {}, 
    Typeset`bookmarkMode$$ = "Menu", Typeset`animator$$, Typeset`animvar$$ = 
    1, Typeset`name$$ = "\"untitled\"", Typeset`specs$$ = {{{
       Hold[$CellContext`cAo$$], 5, 
       "[A\!\(\*SubscriptBox[\(]\), \(0\)]\),\!\(\*FormBox[RowBox[{\" \", \
RowBox[{\"mol\", \" \", \
SuperscriptBox[RowBox[{StyleBox[\"m\",FontSlant->\"Plain\"], \" \"}], \
RowBox[{\"\[Dash]\", \"3\"}]]}]}],TraditionalForm]\)"}, 0.1, 10}, {{
       Hold[$CellContext`cEo$$], 1, 
       "[E\!\(\*SubscriptBox[\(]\), \(0\)]\),\!\(\*FormBox[RowBox[{\" \", \
RowBox[{\"mol\", \" \", \
SuperscriptBox[RowBox[{StyleBox[\"m\",FontSlant->\"Plain\"], \" \"}], \
RowBox[{\"\[Dash]\", \"3\"}]]}]}],TraditionalForm]\)"}, 0.1, 2}, {{
       Hold[$CellContext`cFo$$], 0, 
       "[F\!\(\*SubscriptBox[\(]\), \(0\)]\),\!\(\*FormBox[RowBox[{\" \", \
RowBox[{\"mol\", \" \", \
SuperscriptBox[RowBox[{StyleBox[\"m\",FontSlant->\"Plain\"], \" \"}], \
RowBox[{\"\[Dash]\", \"3\"}]]}]}],TraditionalForm]\)"}, 0, 0}, {{
       Hold[$CellContext`cPo$$], 0, 
       "[P\!\(\*SubscriptBox[\(]\), \(0\)]\),\!\(\*FormBox[RowBox[{\" \", \
RowBox[{\"mol\", \" \", \
SuperscriptBox[RowBox[{StyleBox[\"m\",FontSlant->\"Plain\"], \" \"}], \
RowBox[{\"\[Dash]\", \"3\"}]]}]}],TraditionalForm]\)"}, 0, 0}, {{
       Hold[$CellContext`cQo$$], 0, 
       "[Q\!\(\*SubscriptBox[\(]\), \(0\)]\),\!\(\*FormBox[RowBox[{\" \", \
RowBox[{\"mol\", \" \", \
SuperscriptBox[RowBox[{StyleBox[\"m\",FontSlant->\"Plain\"], \" \"}], \
RowBox[{\"\[Dash]\", \"3\"}]]}]}],TraditionalForm]\)"}, 0, 0}, {{
       Hold[$CellContext`cIo$$], 0, 
       "[I\!\(\*SubscriptBox[\(]\), \(0\)]\),\!\(\*FormBox[RowBox[{\" \", \
RowBox[{\"mol\", \" \", \
SuperscriptBox[RowBox[{StyleBox[\"m\",FontSlant->\"Plain\"], \" \"}], \
RowBox[{\"\[Dash]\", \"3\"}]]}]}],TraditionalForm]\)"}, 0, 0}, {{
       Hold[$CellContext`ka$$], 0.02, 
       "\!\(\*SubscriptBox[StyleBox[\"k\",FontSlant->\"Italic\"], \"a\"]\), \
\!\(\*FormBox[RowBox[{SuperscriptBox[StyleBox[\"s\",FontSlant->\"Plain\"], \
RowBox[{\"\[Dash]\", \"1\"}]], \" \", SuperscriptBox[\"mol\", RowBox[{\"\
\[Dash]\", \"1\"}]], \" \", \
SuperscriptBox[StyleBox[\"m\",FontSlant->\"Plain\"], \
\"3\"]}],TraditionalForm]\)"}, 0.001, 0.04}, {{
       Hold[$CellContext`kd$$], 0.015, 
       "\!\(\*SubscriptBox[StyleBox[\"k\",FontSlant->\"Italic\"], \"d\"]\), \
\!\(\*FormBox[RowBox[{SuperscriptBox[StyleBox[\"s\",FontSlant->\"Plain\"], \
RowBox[{\"\[Dash]\", \"1\"}]], \" \", SuperscriptBox[\"mol\", RowBox[{\"\
\[Dash]\", \"1\"}]], \" \", \
SuperscriptBox[StyleBox[\"m\",FontSlant->\"Plain\"], \
\"3\"]}],TraditionalForm]\)"}, 0.001, 0.03}, {{
       Hold[$CellContext`ki$$], 0.005, 
       "\!\(\*SubscriptBox[StyleBox[\"k\",FontSlant->\"Italic\"], \"i\"]\), \
\!\(\*FormBox[RowBox[{SuperscriptBox[StyleBox[\"s\",FontSlant->\"Plain\"], \
RowBox[{\"\[Dash]\", \"1\"}]], \" \", SuperscriptBox[\"mol\", RowBox[{\"\
\[Dash]\", \"1\"}]], \" \", \
SuperscriptBox[StyleBox[\"m\",FontSlant->\"Plain\"], \
\"3\"]}],TraditionalForm]\)"}, 0.001, 0.01}, {{
       Hold[$CellContext`PingPong$$], 1, "Panel"}, {1 -> "A", 2 -> "C"}}, {
      Hold[
       Row[{
         Column[{
           Style["REACTANTS CONCENTRATIONS:", Bold], 
           Manipulate`Place[1], 
           Manipulate`Place[2], 
           Manipulate`Place[3], 
           Manipulate`Place[4], 
           Manipulate`Place[5], 
           Manipulate`Place[6]}], 
         Column[{
           Style["RATE CONSTANTS:", Bold], 
           Manipulate`Place[7], 
           Manipulate`Place[8], 
           Manipulate`Place[9]}], 
         Manipulate`Place[10]}]], Manipulate`Dump`ThisIsNotAControl}}, 
    Typeset`size$$ = {576., {183., 189.}}, Typeset`update$$ = 0, 
    Typeset`initDone$$, Typeset`skipInitDone$$ = True}, 
    DynamicBox[Manipulate`ManipulateBoxes[
     2, StandardForm, 
      "Variables" :> {$CellContext`cAo$$ = 5, $CellContext`cEo$$ = 
        1, $CellContext`cFo$$ = 0, $CellContext`cIo$$ = 0, $CellContext`cPo$$ = 
        0, $CellContext`cQo$$ = 0, $CellContext`ka$$ = 
        0.02, $CellContext`kd$$ = 0.015, $CellContext`ki$$ = 
        0.005, $CellContext`PingPong$$ = 1}, "ControllerVariables" :> {}, 
      "OtherVariables" :> {
       Typeset`show$$, Typeset`bookmarkList$$, Typeset`bookmarkMode$$, 
        Typeset`animator$$, Typeset`animvar$$, Typeset`name$$, 
        Typeset`specs$$, Typeset`size$$, Typeset`update$$, Typeset`initDone$$,
         Typeset`skipInitDone$$}, "Body" :> 
      Module[{$CellContext`PingPongModel1$, $CellContext`eqPe$, \
$CellContext`eqPeL$, $CellContext`eqQe$, $CellContext`eqQeL$, \
$CellContext`eqEe$, $CellContext`eqFe$, $CellContext`eqIe$, \
$CellContext`eqIeL$, $CellContext`soln$, $CellContext`plot1$, \
$CellContext`plot2$}, $CellContext`PingPongModel1$ = 
         Sequence[
          PlotRange -> Full, PlotLabel -> 
           Style["Ping-Pong Reaction with One Substrate Undergoing \
Disproportionation\nin the Presence of Suicide Substrate Inactivation ([A] \
remains contant, \!\(\*SubscriptBox[StyleBox[\"k\",FontSlant->\"Italic\"], \
\"c\"]\) \[RightArrow] \[Infinity] and \
\!\(\*SubscriptBox[StyleBox[\"k\",FontSlant->\"Italic\"], \"f\"]\) \
\[RightArrow] \[Infinity]):\nA + E \[LongRightArrow] P + F\nA + F \
\[LongRightArrow] Q + E\nA + E \[LongRightArrow] I", FontSize -> 14], Frame -> 
           True, FrameLabel -> {
            "Time, s", 
             "[ ], \!\(\*FormBox[RowBox[{\"mol\", \" \", \
SuperscriptBox[RowBox[{StyleBox[\"m\",FontSlant->\"Plain\"], \" \"}], \
RowBox[{\"\[Dash]\", \"3\"}]]}],TraditionalForm]\)"}, 
           LabelStyle -> {FontSize -> 14}, ImageSize -> 
           1.2 {480, 310}]; $CellContext`eqPe$ = ($CellContext`cEo$$ 
           E^((-(1/2)) $CellContext`cAo$$ ($CellContext`ka$$ + \
$CellContext`kd$$ + $CellContext`ki$$ + 
              Sqrt[(-4) $CellContext`kd$$ $CellContext`ki$$ + \
($CellContext`ka$$ + $CellContext`kd$$ + $CellContext`ki$$)^2]) \
$CellContext`t) $CellContext`ka$$ ($CellContext`ka$$ - 
            E^($CellContext`cAo$$ 
              Sqrt[(-4) $CellContext`kd$$ $CellContext`ki$$ + \
($CellContext`ka$$ + $CellContext`kd$$ + $CellContext`ki$$)^2] \
$CellContext`t) $CellContext`ka$$ + $CellContext`kd$$ - 
            E^($CellContext`cAo$$ 
              Sqrt[(-4) $CellContext`kd$$ $CellContext`ki$$ + \
($CellContext`ka$$ + $CellContext`kd$$ + $CellContext`ki$$)^2] \
$CellContext`t) $CellContext`kd$$ - $CellContext`ki$$ + 
            E^($CellContext`cAo$$ 
               Sqrt[(-4) $CellContext`kd$$ $CellContext`ki$$ + \
($CellContext`ka$$ + $CellContext`kd$$ + $CellContext`ki$$)^2] \
$CellContext`t) $CellContext`ki$$ - 
            Sqrt[(-4) $CellContext`kd$$ $CellContext`ki$$ + \
($CellContext`ka$$ + $CellContext`kd$$ + $CellContext`ki$$)^2] - 
            E^($CellContext`cAo$$ 
              Sqrt[(-4) $CellContext`kd$$ $CellContext`ki$$ + \
($CellContext`ka$$ + $CellContext`kd$$ + $CellContext`ki$$)^2] $CellContext`t)
               Sqrt[(-4) $CellContext`kd$$ $CellContext`ki$$ + \
($CellContext`ka$$ + $CellContext`kd$$ + $CellContext`ki$$)^2] + 
            2 E^((1/2) $CellContext`cAo$$ ($CellContext`ka$$ + \
$CellContext`kd$$ + $CellContext`ki$$ + 
                Sqrt[(-4) $CellContext`kd$$ $CellContext`ki$$ + \
($CellContext`ka$$ + $CellContext`kd$$ + $CellContext`ki$$)^2]) \
$CellContext`t) 
             Sqrt[(-4) $CellContext`kd$$ $CellContext`ki$$ + \
($CellContext`ka$$ + $CellContext`kd$$ + $CellContext`ki$$)^2]))/(
          2 $CellContext`ki$$ 
          Sqrt[(-4) $CellContext`kd$$ $CellContext`ki$$ + ($CellContext`ka$$ + \
$CellContext`kd$$ + $CellContext`ki$$)^2]); $CellContext`eqPeL$ = 
         Limit[$CellContext`eqPe$, $CellContext`t -> 
           Infinity]; $CellContext`eqQe$ = ($CellContext`cEo$$ 
           E^((-(1/2)) $CellContext`cAo$$ ($CellContext`ka$$ + \
$CellContext`kd$$ + $CellContext`ki$$ + 
              Sqrt[(-4) $CellContext`kd$$ $CellContext`ki$$ + \
($CellContext`ka$$ + $CellContext`kd$$ + $CellContext`ki$$)^2]) \
$CellContext`t) $CellContext`ka$$ ($CellContext`ka$$ - 
            E^($CellContext`cAo$$ 
              Sqrt[(-4) $CellContext`kd$$ $CellContext`ki$$ + \
($CellContext`ka$$ + $CellContext`kd$$ + $CellContext`ki$$)^2] \
$CellContext`t) $CellContext`ka$$ + $CellContext`kd$$ - 
            E^($CellContext`cAo$$ 
              Sqrt[(-4) $CellContext`kd$$ $CellContext`ki$$ + \
($CellContext`ka$$ + $CellContext`kd$$ + $CellContext`ki$$)^2] \
$CellContext`t) $CellContext`kd$$ + $CellContext`ki$$ - 
            E^($CellContext`cAo$$ 
              Sqrt[(-4) $CellContext`kd$$ $CellContext`ki$$ + \
($CellContext`ka$$ + $CellContext`kd$$ + $CellContext`ki$$)^2] \
$CellContext`t) $CellContext`ki$$ - 
            Sqrt[(-4) $CellContext`kd$$ $CellContext`ki$$ + \
($CellContext`ka$$ + $CellContext`kd$$ + $CellContext`ki$$)^2] - 
            E^($CellContext`cAo$$ 
              Sqrt[(-4) $CellContext`kd$$ $CellContext`ki$$ + \
($CellContext`ka$$ + $CellContext`kd$$ + $CellContext`ki$$)^2] $CellContext`t)
               Sqrt[(-4) $CellContext`kd$$ $CellContext`ki$$ + \
($CellContext`ka$$ + $CellContext`kd$$ + $CellContext`ki$$)^2] + 
            2 E^((1/2) $CellContext`cAo$$ ($CellContext`ka$$ + \
$CellContext`kd$$ + $CellContext`ki$$ + 
                Sqrt[(-4) $CellContext`kd$$ $CellContext`ki$$ + \
($CellContext`ka$$ + $CellContext`kd$$ + $CellContext`ki$$)^2]) \
$CellContext`t) 
             Sqrt[(-4) $CellContext`kd$$ $CellContext`ki$$ + \
($CellContext`ka$$ + $CellContext`kd$$ + $CellContext`ki$$)^2]))/(
          2 $CellContext`ki$$ 
          Sqrt[(-4) $CellContext`kd$$ $CellContext`ki$$ + ($CellContext`ka$$ + \
$CellContext`kd$$ + $CellContext`ki$$)^2]); $CellContext`eqQeL$ = 
         Limit[$CellContext`eqQe$, $CellContext`t -> 
           Infinity]; $CellContext`eqIe$ = (-(1/(2 
            Sqrt[(-4) $CellContext`kd$$ $CellContext`ki$$ + \
($CellContext`ka$$ + $CellContext`kd$$ + $CellContext`ki$$)^2]))) \
$CellContext`cEo$$ 
          E^((-(1/2)) $CellContext`cAo$$ ($CellContext`ka$$ + \
$CellContext`kd$$ + $CellContext`ki$$ + 
             Sqrt[(-4) $CellContext`kd$$ $CellContext`ki$$ + \
($CellContext`ka$$ + $CellContext`kd$$ + $CellContext`ki$$)^2]) \
$CellContext`t) (-$CellContext`ka$$ + 
           E^($CellContext`cAo$$ 
              Sqrt[(-4) $CellContext`kd$$ $CellContext`ki$$ + \
($CellContext`ka$$ + $CellContext`kd$$ + $CellContext`ki$$)^2] \
$CellContext`t) $CellContext`ka$$ - $CellContext`kd$$ + 
           E^($CellContext`cAo$$ 
              Sqrt[(-4) $CellContext`kd$$ $CellContext`ki$$ + \
($CellContext`ka$$ + $CellContext`kd$$ + $CellContext`ki$$)^2] \
$CellContext`t) $CellContext`kd$$ + $CellContext`ki$$ - 
           E^($CellContext`cAo$$ 
             Sqrt[(-4) $CellContext`kd$$ $CellContext`ki$$ + \
($CellContext`ka$$ + $CellContext`kd$$ + $CellContext`ki$$)^2] \
$CellContext`t) $CellContext`ki$$ + 
           Sqrt[(-4) $CellContext`kd$$ $CellContext`ki$$ + ($CellContext`ka$$ + \
$CellContext`kd$$ + $CellContext`ki$$)^2] + 
           E^($CellContext`cAo$$ 
              Sqrt[(-4) $CellContext`kd$$ $CellContext`ki$$ + \
($CellContext`ka$$ + $CellContext`kd$$ + $CellContext`ki$$)^2] $CellContext`t)
               Sqrt[(-4) $CellContext`kd$$ $CellContext`ki$$ + \
($CellContext`ka$$ + $CellContext`kd$$ + $CellContext`ki$$)^2] - 2 
           E^((1/2) $CellContext`cAo$$ ($CellContext`ka$$ + $CellContext`kd$$ + \
$CellContext`ki$$ + 
              Sqrt[(-4) $CellContext`kd$$ $CellContext`ki$$ + \
($CellContext`ka$$ + $CellContext`kd$$ + $CellContext`ki$$)^2]) \
$CellContext`t) 
           Sqrt[(-4) $CellContext`kd$$ $CellContext`ki$$ + ($CellContext`ka$$ + \
$CellContext`kd$$ + $CellContext`ki$$)^2]); $CellContext`eqIeL$ = 
         Limit[$CellContext`eqIe$, $CellContext`t -> 
           Infinity]; $CellContext`eqEe$ = (1/(2 
           Sqrt[(-4) $CellContext`kd$$ $CellContext`ki$$ + ($CellContext`ka$$ + \
$CellContext`kd$$ + $CellContext`ki$$)^2])) $CellContext`cEo$$ 
          E^((-(1/2)) $CellContext`cAo$$ ($CellContext`ka$$ + \
$CellContext`kd$$ + $CellContext`ki$$ + 
             Sqrt[(-4) $CellContext`kd$$ $CellContext`ki$$ + \
($CellContext`ka$$ + $CellContext`kd$$ + $CellContext`ki$$)^2]) \
$CellContext`t) ($CellContext`ka$$ - 
           E^($CellContext`cAo$$ 
             Sqrt[(-4) $CellContext`kd$$ $CellContext`ki$$ + \
($CellContext`ka$$ + $CellContext`kd$$ + $CellContext`ki$$)^2] \
$CellContext`t) $CellContext`ka$$ - $CellContext`kd$$ + 
           E^($CellContext`cAo$$ 
              Sqrt[(-4) $CellContext`kd$$ $CellContext`ki$$ + \
($CellContext`ka$$ + $CellContext`kd$$ + $CellContext`ki$$)^2] \
$CellContext`t) $CellContext`kd$$ + $CellContext`ki$$ - 
           E^($CellContext`cAo$$ 
             Sqrt[(-4) $CellContext`kd$$ $CellContext`ki$$ + \
($CellContext`ka$$ + $CellContext`kd$$ + $CellContext`ki$$)^2] \
$CellContext`t) $CellContext`ki$$ + 
           Sqrt[(-4) $CellContext`kd$$ $CellContext`ki$$ + ($CellContext`ka$$ + \
$CellContext`kd$$ + $CellContext`ki$$)^2] + 
           E^($CellContext`cAo$$ 
              Sqrt[(-4) $CellContext`kd$$ $CellContext`ki$$ + \
($CellContext`ka$$ + $CellContext`kd$$ + $CellContext`ki$$)^2] $CellContext`t)
               Sqrt[(-4) $CellContext`kd$$ $CellContext`ki$$ + \
($CellContext`ka$$ + $CellContext`kd$$ + $CellContext`ki$$)^2]); \
$CellContext`eqFe$ = $CellContext`cEo$$ 
          E^((-(1/2)) $CellContext`cAo$$ ($CellContext`ka$$ + \
$CellContext`kd$$ + $CellContext`ki$$ + 
             Sqrt[(-4) $CellContext`kd$$ $CellContext`ki$$ + \
($CellContext`ka$$ + $CellContext`kd$$ + $CellContext`ki$$)^2]) \
$CellContext`t) (-1 + 
           E^($CellContext`cAo$$ 
             Sqrt[(-4) $CellContext`kd$$ $CellContext`ki$$ + \
($CellContext`ka$$ + $CellContext`kd$$ + $CellContext`ki$$)^2] \
$CellContext`t)) $CellContext`ka$$/
          Sqrt[(-4) $CellContext`kd$$ $CellContext`ki$$ + ($CellContext`ka$$ + \
$CellContext`kd$$ + $CellContext`ki$$)^2]; $CellContext`plot1$ = 
         Plot[{$CellContext`eqPe$, $CellContext`eqPeL$; $CellContext`eqQe$, \
$CellContext`eqQeL$}, {$CellContext`t, 0., 250}, 
           Evaluate[$CellContext`PingPongModel1$], PlotStyle -> {{Thick, 
              Darker[Green]}, {Thick, Pink}, {Black, Dashed}}, Epilog -> {
             Inset[
              Style[
              "[P\!\(\*SubscriptBox[\(]\), \(E\)]\)", 12, Background -> 
               White], {100, 
               ReplaceAll[0.3 + $CellContext`eqPe$, $CellContext`t -> 100]}], 
             Inset[
              Style[
              "[Q\!\(\*SubscriptBox[\(]\), \(E\)]\)", 12, Background -> 
               White], {50, 
               
               ReplaceAll[-0.5 + $CellContext`eqQe$, $CellContext`t -> 
                50]}]}]; $CellContext`plot2$ = 
         Plot[{$CellContext`eqEe$, $CellContext`eqFe$, $CellContext`eqIe$, \
$CellContext`eqIeL$}, {$CellContext`t, 0, 250}, 
           Evaluate[$CellContext`PingPongModel1$], 
           PlotStyle -> {{Thick, Blue}, {Thick, Brown}, {Thick, Green}, {
             Thick, Black, Dashed}}, Epilog -> {
             Inset[
              Style[
              "[E\!\(\*SubscriptBox[\(]\), \(E\)]\)", 12, Background -> 
               White], {20, 
               ReplaceAll[$CellContext`eqEe$, $CellContext`t -> 3]}], 
             Inset[
              Style[
              "[F\!\(\*SubscriptBox[\(]\), \(E\)]\)", 12, Background -> 
               White], {100, 
               ReplaceAll[0.1 + $CellContext`eqFe$, $CellContext`t -> 100]}], 
             Inset[
              Style[
              "[I\!\(\*SubscriptBox[\(]\), \(E\)]\)", 12, Background -> 
               White], {150, 
               ReplaceAll[
               0.08 + $CellContext`eqIe$, $CellContext`t -> 150]}]}]; Pane[
          Switch[$CellContext`PingPong$$, 1, 
           Show[$CellContext`plot1$], 2, 
           Show[$CellContext`plot2$]], ImageSize -> 1.2 {480, 310}]], 
      "Specifications" :> {{{$CellContext`cAo$$, 5, 
          "[A\!\(\*SubscriptBox[\(]\), \(0\)]\),\!\(\*FormBox[RowBox[{\" \", \
RowBox[{\"mol\", \" \", \
SuperscriptBox[RowBox[{StyleBox[\"m\",FontSlant->\"Plain\"], \" \"}], \
RowBox[{\"\[Dash]\", \"3\"}]]}]}],TraditionalForm]\)"}, 0.1, 10, Appearance -> 
         "Labeled", ControlPlacement -> 
         1}, {{$CellContext`cEo$$, 1, 
          "[E\!\(\*SubscriptBox[\(]\), \(0\)]\),\!\(\*FormBox[RowBox[{\" \", \
RowBox[{\"mol\", \" \", \
SuperscriptBox[RowBox[{StyleBox[\"m\",FontSlant->\"Plain\"], \" \"}], \
RowBox[{\"\[Dash]\", \"3\"}]]}]}],TraditionalForm]\)"}, 0.1, 2, Appearance -> 
         "Labeled", ControlPlacement -> 
         2}, {{$CellContext`cFo$$, 0, 
          "[F\!\(\*SubscriptBox[\(]\), \(0\)]\),\!\(\*FormBox[RowBox[{\" \", \
RowBox[{\"mol\", \" \", \
SuperscriptBox[RowBox[{StyleBox[\"m\",FontSlant->\"Plain\"], \" \"}], \
RowBox[{\"\[Dash]\", \"3\"}]]}]}],TraditionalForm]\)"}, 0, 0, Appearance -> 
         "Labeled", ControlPlacement -> 
         3}, {{$CellContext`cPo$$, 0, 
          "[P\!\(\*SubscriptBox[\(]\), \(0\)]\),\!\(\*FormBox[RowBox[{\" \", \
RowBox[{\"mol\", \" \", \
SuperscriptBox[RowBox[{StyleBox[\"m\",FontSlant->\"Plain\"], \" \"}], \
RowBox[{\"\[Dash]\", \"3\"}]]}]}],TraditionalForm]\)"}, 0, 0, Appearance -> 
         "Labeled", ControlPlacement -> 
         4}, {{$CellContext`cQo$$, 0, 
          "[Q\!\(\*SubscriptBox[\(]\), \(0\)]\),\!\(\*FormBox[RowBox[{\" \", \
RowBox[{\"mol\", \" \", \
SuperscriptBox[RowBox[{StyleBox[\"m\",FontSlant->\"Plain\"], \" \"}], \
RowBox[{\"\[Dash]\", \"3\"}]]}]}],TraditionalForm]\)"}, 0, 0, Appearance -> 
         "Labeled", ControlPlacement -> 
         5}, {{$CellContext`cIo$$, 0, 
          "[I\!\(\*SubscriptBox[\(]\), \(0\)]\),\!\(\*FormBox[RowBox[{\" \", \
RowBox[{\"mol\", \" \", \
SuperscriptBox[RowBox[{StyleBox[\"m\",FontSlant->\"Plain\"], \" \"}], \
RowBox[{\"\[Dash]\", \"3\"}]]}]}],TraditionalForm]\)"}, 0, 0, Appearance -> 
         "Labeled", ControlPlacement -> 
         6}, {{$CellContext`ka$$, 0.02, 
          "\!\(\*SubscriptBox[StyleBox[\"k\",FontSlant->\"Italic\"], \
\"a\"]\), \
\!\(\*FormBox[RowBox[{SuperscriptBox[StyleBox[\"s\",FontSlant->\"Plain\"], \
RowBox[{\"\[Dash]\", \"1\"}]], \" \", SuperscriptBox[\"mol\", RowBox[{\"\
\[Dash]\", \"1\"}]], \" \", \
SuperscriptBox[StyleBox[\"m\",FontSlant->\"Plain\"], \
\"3\"]}],TraditionalForm]\)"}, 0.001, 0.04, Appearance -> "Labeled", 
         ControlPlacement -> 
         7}, {{$CellContext`kd$$, 0.015, 
          "\!\(\*SubscriptBox[StyleBox[\"k\",FontSlant->\"Italic\"], \
\"d\"]\), \
\!\(\*FormBox[RowBox[{SuperscriptBox[StyleBox[\"s\",FontSlant->\"Plain\"], \
RowBox[{\"\[Dash]\", \"1\"}]], \" \", SuperscriptBox[\"mol\", RowBox[{\"\
\[Dash]\", \"1\"}]], \" \", \
SuperscriptBox[StyleBox[\"m\",FontSlant->\"Plain\"], \
\"3\"]}],TraditionalForm]\)"}, 0.001, 0.03, Appearance -> "Labeled", 
         ControlPlacement -> 
         8}, {{$CellContext`ki$$, 0.005, 
          "\!\(\*SubscriptBox[StyleBox[\"k\",FontSlant->\"Italic\"], \
\"i\"]\), \
\!\(\*FormBox[RowBox[{SuperscriptBox[StyleBox[\"s\",FontSlant->\"Plain\"], \
RowBox[{\"\[Dash]\", \"1\"}]], \" \", SuperscriptBox[\"mol\", RowBox[{\"\
\[Dash]\", \"1\"}]], \" \", \
SuperscriptBox[StyleBox[\"m\",FontSlant->\"Plain\"], \
\"3\"]}],TraditionalForm]\)"}, 0.001, 0.01, Appearance -> "Labeled", 
         ControlPlacement -> 9}, {{$CellContext`PingPong$$, 1, "Panel"}, {
         1 -> "A", 2 -> "C"}, ControlType -> Setter, ControlPlacement -> 10}, 
        Row[{
          Column[{
            Style["REACTANTS CONCENTRATIONS:", Bold], 
            Manipulate`Place[1], 
            Manipulate`Place[2], 
            Manipulate`Place[3], 
            Manipulate`Place[4], 
            Manipulate`Place[5], 
            Manipulate`Place[6]}], 
          Column[{
            Style["RATE CONSTANTS:", Bold], 
            Manipulate`Place[7], 
            Manipulate`Place[8], 
            Manipulate`Place[9]}], 
          Manipulate`Place[10]}]}, "Options" :> {}, "DefaultOptions" :> {}],
     ImageSizeCache->{763., {367., 373.}},
     SingleEvaluation->True],
    Deinitialization:>None,
    DynamicModuleValues:>{},
    SynchronousInitialization->True,
    UndoTrackedVariables:>{Typeset`show$$, Typeset`bookmarkMode$$},
    UnsavedVariables:>{Typeset`initDone$$},
    UntrackedVariables:>{Typeset`size$$}], "Manipulate",
   Deployed->True,
   StripOnInput->False],
  Manipulate`InterpretManipulate[1]]], "Output",
 CellChangeTimes->{
  3.856526643694892*^9, 3.856526881300912*^9, 3.8565270205664315`*^9, 
   3.8565270640817413`*^9, 3.8565276424992237`*^9, 3.8565277278585863`*^9, {
   3.8565279184238615`*^9, 3.856527946862521*^9}, {3.856528040260747*^9, 
   3.8565280441165576`*^9}, 3.8565779293699164`*^9, 3.8565780979130845`*^9, 
   3.856578215663393*^9, 3.8565785450181284`*^9, 3.8565785901950035`*^9, {
   3.8565859708384004`*^9, 3.8565859913960714`*^9}, 3.856586027746921*^9, 
   3.8565860645523863`*^9, 3.8565861299912014`*^9, 3.856586356281415*^9, 
   3.8565863969124804`*^9, 3.856586442616291*^9, 3.8565865588702726`*^9, 
   3.8565866081012564`*^9, {3.85658664098417*^9, 3.856586700517085*^9}, 
   3.8565870509752164`*^9, 3.8565872604474683`*^9, 3.856587333244245*^9, 
   3.8565887698955307`*^9, 3.8565889216581616`*^9, 3.856592054805133*^9, 
   3.856592219821121*^9, 3.856592311316618*^9, {3.85659236616438*^9, 
   3.856592388877569*^9}, 3.8565924753729067`*^9, 3.856592706543508*^9, 
   3.85659274818999*^9, {3.8565927864153976`*^9, 3.8565928233598614`*^9}, 
   3.8565928733949957`*^9, 3.856592935536644*^9, 3.856593015456356*^9, {
   3.856593068300485*^9, 3.8565930932633533`*^9}, 3.8565931421285233`*^9, 
   3.8565932121433783`*^9, 3.856593294233471*^9, 3.856593462709584*^9, 
   3.85659805067476*^9, 3.8565981233069386`*^9, 3.8583138531440463`*^9, 
   3.859442275496838*^9, 3.8594433223872833`*^9, {3.8594433576575537`*^9, 
   3.859443359733989*^9}, 3.8595122264711523`*^9, 3.8595123899247017`*^9, 
   3.8595136409327593`*^9, 3.8595137005124903`*^9, 3.8595137852670603`*^9, 
   3.85951404025685*^9, 3.859514127290185*^9, 3.859514209871159*^9, 
   3.859514253642109*^9, 3.8595143070514402`*^9, 3.8595143845818167`*^9, 
   3.8595144795306053`*^9, 3.8625433903415728`*^9, 3.862543468497164*^9, 
   3.8625462903688965`*^9, {3.8625463345940833`*^9, 3.86254635857908*^9}, {
   3.8625464414884357`*^9, 3.862546457559992*^9}, {3.8625465337318573`*^9, 
   3.86254653421612*^9}, 3.862546737233865*^9, 3.8625533228654585`*^9, 
   3.8625535366091785`*^9, {3.8625539813867197`*^9, 3.8625540072097096`*^9}, 
   3.8625541799446297`*^9, 3.862554244904978*^9, 3.862555176069815*^9, 
   3.8625552152865157`*^9, {3.862555313449843*^9, 3.8625553185267467`*^9}, 
   3.862555459905966*^9, {3.8625555909555783`*^9, 3.8625556138314667`*^9}, 
   3.862555740139844*^9, 3.862555937417839*^9, 3.8625559898408003`*^9, 
   3.8625560385963383`*^9, {3.8625560736429377`*^9, 3.8625561031259856`*^9}, 
   3.8625561510814247`*^9, 3.8625561963774433`*^9, 3.862556233848853*^9, 
   3.8625562686837864`*^9, {3.862556327373604*^9, 3.8625563517593136`*^9}, {
   3.862556391909941*^9, 3.8625564124829917`*^9}, {3.8625644018286314`*^9, 
   3.862564413388619*^9}, 3.862564512748014*^9, 3.8625646144285746`*^9, 
   3.862564890473421*^9, 3.8625649909296746`*^9, 3.8625651715889254`*^9, 
   3.8625654402012253`*^9, 3.862565731888188*^9, 3.862566154588475*^9, 
   3.86256699920183*^9, 3.8625671838496847`*^9, 3.862626118016555*^9, 
   3.8626262196332293`*^9, 3.8626262570497713`*^9, 3.862626331750939*^9, 
   3.8626267235661383`*^9, 3.8626270498250203`*^9, 3.8626271170279555`*^9, 
   3.8626272209722404`*^9, 3.862627255385985*^9, 3.8626276103436565`*^9, 
   3.862627641297164*^9, 3.862627688324753*^9, 3.8626280957983427`*^9, 
   3.86262815125504*^9, 3.8626284533579216`*^9, 3.8626286026879206`*^9, 
   3.862628677538403*^9, {3.862628738696551*^9, 3.86262874181067*^9}, 
   3.862628785287989*^9, 3.8629728378965836`*^9, {3.8629729246129007`*^9, 
   3.862972942577518*^9}, 3.8752417781861763`*^9, 3.875241889794859*^9, 
   3.8752424536453896`*^9, 3.8752428832225704`*^9, 3.875243305671942*^9, 
   3.875243529236599*^9, {3.875244195080408*^9, 3.875244218147596*^9}, 
   3.875244345236273*^9, 3.8752444110248537`*^9, 3.875244456484705*^9, {
   3.8752448037069707`*^9, 3.8752448143936925`*^9}, 3.87524519276725*^9, {
   3.875245223909638*^9, 3.875245245147093*^9}, 3.8752454217372036`*^9, 
   3.8752461446036425`*^9, 3.8752461753095675`*^9, 3.8752462704439545`*^9, 
   3.875246333188609*^9, {3.875246367339385*^9, 3.8752464016542654`*^9}, 
   3.8754082842499003`*^9, {3.875408408989957*^9, 3.8754084239949827`*^9}, {
   3.8754084980263877`*^9, 3.8754085266234245`*^9}, {3.8754085929096317`*^9, 
   3.8754086444676027`*^9}, 3.8755363698139763`*^9, 3.87553680084005*^9, 
   3.8755375836998167`*^9, 3.875538209284398*^9, 3.8755390123821306`*^9, 
   3.8757671245678425`*^9, 3.8765643868796735`*^9, 3.876564504885866*^9},
 CellLabel->"Out[5]=",ExpressionUUID->"c0acdb4e-a656-41e2-827d-91fd27e48faf"]
}, Open  ]]
}, Open  ]]
}, Open  ]]
}, Open  ]]
},
WindowSize->{906, 961},
WindowMargins->{{Automatic, 111}, {-7, Automatic}},
FrontEndVersion->"12.2 for Microsoft Windows (64-bit) (December 12, 2020)",
StyleDefinitions->"Default.nb",
ExpressionUUID->"280bd18d-c55c-49d7-b77c-a61ede6cd555"
]
(* End of Notebook Content *)

(* Internal cache information *)
(*CellTagsOutline
CellTagsIndex->{}
*)
(*CellTagsIndex
CellTagsIndex->{}
*)
(*NotebookFileOutline
Notebook[{
Cell[CellGroupData[{
Cell[580, 22, 300, 7, 105, "Section",ExpressionUUID->"b08373cd-4c62-48f4-8269-92751363fe0b"],
Cell[CellGroupData[{
Cell[905, 33, 20679, 312, 182, "Subsection",ExpressionUUID->"dd6a3105-053c-494d-a465-1e1f78b1aa76"],
Cell[CellGroupData[{
Cell[21609, 349, 970, 17, 144, "Subsubsection",ExpressionUUID->"66e2a5d3-add2-4c96-860e-914ca1f8aea1"],
Cell[CellGroupData[{
Cell[22604, 370, 2617, 80, 124, "Input",ExpressionUUID->"910dc5d2-9285-4e3d-9be8-1f58cb582a25"],
Cell[25224, 452, 549, 15, 32, "Output",ExpressionUUID->"cb3a2a11-0755-4c54-b260-f1a7ef26456c"],
Cell[25776, 469, 515, 14, 32, "Output",ExpressionUUID->"cb740433-aaf3-48f9-b974-bfddbbe21196"],
Cell[26294, 485, 549, 15, 32, "Output",ExpressionUUID->"05559a3c-047e-4134-b7f3-ecf7fae34deb"],
Cell[26846, 502, 381, 9, 32, "Output",ExpressionUUID->"6b3e3c2b-af56-43e4-b625-4893fbf776e7"],
Cell[27230, 513, 383, 9, 32, "Output",ExpressionUUID->"2892a288-0fc7-49f2-9af2-396a15cfd0b0"],
Cell[27616, 524, 383, 9, 32, "Output",ExpressionUUID->"9053c907-0908-4647-8ce0-823bf147b1c9"]
}, Open  ]],
Cell[CellGroupData[{
Cell[28036, 538, 1912, 55, 87, "Input",ExpressionUUID->"fcce5c0e-7894-4154-8204-55235632b70a"],
Cell[29951, 595, 4553, 132, 188, "Output",ExpressionUUID->"6bd209c0-8d66-4aec-949d-627525f2a16f"]
}, Open  ]],
Cell[CellGroupData[{
Cell[34541, 732, 4057, 107, 221, "Input",ExpressionUUID->"1e4d02ff-1234-4597-8cf8-4f1aaf047563"],
Cell[38601, 841, 4169, 116, 114, "Output",ExpressionUUID->"9886b9f3-39ac-4706-9a84-0737d5ae2d9b"]
}, Open  ]],
Cell[CellGroupData[{
Cell[42807, 962, 4526, 123, 264, "Input",ExpressionUUID->"fb6769a2-8bd3-46d3-ad11-a0e3f89de74b"],
Cell[47336, 1087, 275, 6, 50, "Output",ExpressionUUID->"297ca8de-6746-468a-8fa9-ca73c4dced93"]
}, Open  ]],
Cell[CellGroupData[{
Cell[47648, 1098, 2146, 56, 170, "Input",ExpressionUUID->"3b490e6f-f520-4cdf-998d-65ceebc73a2a"],
Cell[49797, 1156, 4122, 115, 114, "Output",ExpressionUUID->"da2da597-ac43-44de-bc29-b74990fba69e"]
}, Open  ]],
Cell[CellGroupData[{
Cell[53956, 1276, 4447, 122, 264, "Input",ExpressionUUID->"49a76b22-456c-4ade-8e18-547c09107950"],
Cell[58406, 1400, 195, 4, 50, "Output",ExpressionUUID->"7989240b-0c3b-4a73-b60a-19556a8418de"]
}, Open  ]],
Cell[CellGroupData[{
Cell[58638, 1409, 3914, 105, 221, "Input",ExpressionUUID->"05161130-059c-4652-a48c-3e63063f8cee"],
Cell[62555, 1516, 3942, 113, 159, "Output",ExpressionUUID->"e2949cce-e2c3-4d5e-88a2-dab0ba392486"]
}, Open  ]],
Cell[CellGroupData[{
Cell[66534, 1634, 4182, 120, 241, "Input",ExpressionUUID->"02741836-0f29-42b6-99fd-5b52317a0cea"],
Cell[70719, 1756, 153, 2, 32, "Output",ExpressionUUID->"011dba62-5e35-406a-9b20-517cd3eefeac"]
}, Open  ]],
Cell[CellGroupData[{
Cell[70909, 1763, 53532, 1082, 1950, "Input",ExpressionUUID->"fcf08fdf-8ce7-405e-b8ba-c7eb263bf932"],
Cell[124444, 2847, 25242, 450, 780, "Output",ExpressionUUID->"c0acdb4e-a656-41e2-827d-91fd27e48faf"]
}, Open  ]]
}, Open  ]]
}, Open  ]]
}, Open  ]]
}
]
*)
