# Supplementary material
Source: MDPI journal article supplement (https://www.mdpi.com/2227-7390/10/22/4240)
Supplement: s1 [file s1 › Figure S1ACE_Mathematics-1964681.nb]

(* Content-type: application/vnd.wolfram.mathematica *)

(*** Wolfram Notebook File ***)
(* http://www.wolfram.com/nb *)

(* CreatedBy='Mathematica 12.2' *)

(*CacheID: 234*)
(* Internal cache information:
NotebookFileLineBreakTest
NotebookFileLineBreakTest
NotebookDataPosition[       158,          7]
NotebookDataLength[    131786,       2540]
NotebookOptionsPosition[    129353,       2488]
NotebookOutlinePosition[    129754,       2504]
CellTagsIndexPosition[    129711,       2501]
WindowFrame->Normal*)

(* Beginning of Notebook Content *)
Notebook[{

Cell[CellGroupData[{
Cell["\<\
Ping-Pong Reaction with One Substrate Undergoing Disproportionation in the \
Absence of Suicide Substrate Inactivation\
\>", "Section",
 CellChangeTimes->{
  3.8753669257107997`*^9, {3.8753669685163937`*^9, 3.875367018214018*^9}, {
   3.8755891156462336`*^9, 3.875589117650921*^9}, {3.8765645311634684`*^9, 
   3.8765645316614857`*^9}},ExpressionUUID->"fcdc43a0-651d-4e85-be85-\
b20ade3d5410"],

Cell[CellGroupData[{

Cell[TextData[{
 StyleBox[Cell[BoxData[
  FormBox[GridBox[{
     {
      RowBox[{
       RowBox[{
       Cell["A", "Text",ExpressionUUID->
         "2a9103e5-dcbc-4435-9b4d-f82408b25403"], "+", Cell[
        "E\[NonBreakingSpace]", "Text",ExpressionUUID->
         "b0c1b436-6aa8-4a34-b8d4-e8dfd3baebde"]}], 
       OverscriptBox["\[RightArrow]", 
        SubscriptBox["k", "a"]], 
       RowBox[{
       Cell["F", "Text",ExpressionUUID->
         "fa3ab7f0-a460-46fb-8c9f-e66a31baa1b9"], "+", Cell[
        "P", "Text",ExpressionUUID->
         "268a3ea5-0689-45cc-96a5-ab685129b1d9"]}]}]},
     {
      RowBox[{
       RowBox[{
       Cell["A", "Text",ExpressionUUID->
         "b01cad7d-710b-42ef-a17c-7224bd8259b0"], "+", Cell[
        "F\[NonBreakingSpace]", "Text",ExpressionUUID->
         "ac9013b2-9218-4110-925e-a1c216e57452"]}], 
       OverscriptBox["\[RightArrow]", 
        SubscriptBox["k", "d"]], 
       RowBox[{
       Cell["E", "Text",ExpressionUUID->
         "948d7352-1690-43aa-90ec-1a5265b22be6"], "+", Cell[
        "Q", "Text",ExpressionUUID->
         "2ec8a62f-1217-4bc2-912e-f5e90c373e69"]}]}]}
    },
    GridBoxAlignment->{"Columns" -> {{Left}}, "Rows" -> {{Baseline}}}], 
   TraditionalForm]], "Subsection",ExpressionUUID->
  "6d367272-09f7-4372-81a1-a0fc40f49df4"], "Subsection"],
 StyleBox["\n\n", "Subsection"],
 Cell[BoxData[
  RowBox[{
   RowBox[{
    SubscriptBox[
     StyleBox["k",
      FontSlant->"Italic"], "a"], "<", 
    SubscriptBox[
     StyleBox["k",
      FontSlant->"Italic"], "d"]}], ","}]],
  CellChangeTimes->{{3.841749732856798*^9, 3.841749906918338*^9}, {
    3.841750053788534*^9, 3.8417500568715334`*^9}, {3.8418036925935926`*^9, 
    3.841803706752474*^9}, {3.8418037607203846`*^9, 3.841803774188929*^9}, {
    3.8418038073567395`*^9, 3.8418038499275484`*^9}, 3.841803904405038*^9, {
    3.8418053228201857`*^9, 3.841805323938447*^9}, {3.841805430221315*^9, 
    3.841805430784861*^9}, {3.8418056712220964`*^9, 3.8418056725014286`*^9}, {
    3.841836424378595*^9, 3.8418364269817724`*^9}, {3.8418867914336452`*^9, 
    3.841886853106645*^9}, {3.841886891238326*^9, 3.8418869414298725`*^9}, {
    3.8418871779836135`*^9, 3.8418871986816463`*^9}, {3.8418872411875305`*^9, 
    3.841887251013095*^9}, {3.84188731368587*^9, 3.8418873297914915`*^9}, {
    3.8418874752412233`*^9, 3.8418874765690117`*^9}, 3.8418875913857713`*^9, {
    3.841887944680502*^9, 3.841888206986114*^9}, {3.8418882799062786`*^9, 
    3.8418882862487326`*^9}, {3.8418883519361906`*^9, 3.841888407829341*^9}, {
    3.8418884538187127`*^9, 3.8418884964492006`*^9}, {3.8420104553380365`*^9, 
    3.842010456105392*^9}, {3.842010501475397*^9, 3.8420105017222424`*^9}, 
    3.8420105393949304`*^9, {3.8466571293324575`*^9, 
    3.8466571443435946`*^9}, {3.846657370778998*^9, 3.8466574869332204`*^9}, {
    3.846657601401836*^9, 3.846657689884245*^9}, 3.846658199217289*^9, {
    3.8466582422685738`*^9, 3.8466583553051624`*^9}, {3.8466583890306325`*^9, 
    3.846658445869364*^9}, {3.8466587017050686`*^9, 3.846658727875573*^9}, {
    3.8466589044445233`*^9, 3.846658923562812*^9}, {3.8466590107398157`*^9, 
    3.846659080311597*^9}, {3.846659127976855*^9, 3.846659128101828*^9}, {
    3.8466591912168427`*^9, 3.8466592481487646`*^9}, {3.8466594766550484`*^9, 
    3.846659533599231*^9}, {3.84665958437168*^9, 3.846659863675767*^9}, {
    3.8466598938799286`*^9, 3.846660059514933*^9}, {3.846669158921476*^9, 
    3.846669160540101*^9}, {3.846669210254387*^9, 3.8466695226397595`*^9}, {
    3.8466696739300594`*^9, 3.846669700555784*^9}, {3.846669733667065*^9, 
    3.846669830943153*^9}, {3.846669942941931*^9, 3.846669970183852*^9}, {
    3.8466700023530407`*^9, 3.846670003337158*^9}, {3.846670285534099*^9, 
    3.8466702962801914`*^9}, 3.846670457513308*^9, {3.846670500562671*^9, 
    3.8466705275347214`*^9}, {3.8466707719949465`*^9, 
    3.8466708730671043`*^9}, {3.8466709531558485`*^9, 
    3.8466710349452095`*^9}, {3.8466710720817604`*^9, 3.84667111103518*^9}, {
    3.8466711412342763`*^9, 3.8466712050839252`*^9}, {3.846671240711611*^9, 
    3.846671300266326*^9}, {3.846671342372938*^9, 3.8466714524283266`*^9}, {
    3.8466715047371726`*^9, 3.846671713659568*^9}, {3.8466722931171083`*^9, 
    3.8466723395722675`*^9}, 3.846672384048112*^9, {3.846739969188094*^9, 
    3.846739972171768*^9}, 3.846745658041407*^9, 3.846746398433676*^9, {
    3.846764496223112*^9, 3.846764552952351*^9}, {3.8472766347056165`*^9, 
    3.847276669849394*^9}, {3.847276713138187*^9, 3.847276721757236*^9}, {
    3.8472770823160067`*^9, 3.8472771436873293`*^9}, {3.847277313528089*^9, 
    3.8472773203345337`*^9}, {3.847277416301323*^9, 3.8472774310812693`*^9}, {
    3.8472774750157623`*^9, 3.847277479177511*^9}, {3.8472775316318893`*^9, 
    3.8472775758940177`*^9}, {3.8472776543078303`*^9, 
    3.8472776815826125`*^9}, {3.8472820829125304`*^9, 3.847282101713642*^9}, {
    3.847282202644628*^9, 3.8472822104353604`*^9}, {3.847282267459462*^9, 
    3.847282310564173*^9}, {3.8472823596584167`*^9, 3.847282370012159*^9}, {
    3.84728242923578*^9, 3.847282460379707*^9}, 3.8472825661218014`*^9, {
    3.847282602620706*^9, 3.847282614768936*^9}, {3.847335149022919*^9, 
    3.8473351951998057`*^9}, {3.847335255588388*^9, 3.8473352622853622`*^9}, 
    3.847335299620603*^9, {3.847335579443143*^9, 3.847335608350524*^9}, {
    3.8473356424322844`*^9, 3.84733571358677*^9}, {3.8473357501219473`*^9, 
    3.8473359066759663`*^9}, {3.847336046522848*^9, 3.847336053503533*^9}, {
    3.8473361964772964`*^9, 3.847336200021795*^9}, {3.8473362736531377`*^9, 
    3.847336288747509*^9}, {3.8473481034081535`*^9, 3.8473481111240797`*^9}, {
    3.848382018287554*^9, 3.8483820505924406`*^9}, {3.8483820856130686`*^9, 
    3.8483821106696844`*^9}, {3.848382145520816*^9, 3.8483821466143074`*^9}, 
    3.848382193853175*^9, {3.8483823158244123`*^9, 3.8483823864694166`*^9}, {
    3.8483824661294794`*^9, 3.848382489858067*^9}, {3.848382561091242*^9, 
    3.848382564293646*^9}, {3.851685314669648*^9, 3.8516853345712028`*^9}, {
    3.851685467649209*^9, 3.8516855020422287`*^9}, {3.8516869238465166`*^9, 
    3.85168695982136*^9}, {3.8516872104938073`*^9, 3.8516872120405083`*^9}, {
    3.851687248756606*^9, 3.8516872707514334`*^9}, {3.8516878641505013`*^9, 
    3.8516880498282366`*^9}, {3.8516882835180893`*^9, 3.851688291032139*^9}, {
    3.851688381385642*^9, 3.85168840174336*^9}, {3.851688516903908*^9, 
    3.8516885512922974`*^9}, 3.8516888509872847`*^9, {3.8516890734305644`*^9, 
    3.8516890753207664`*^9}, 3.8517484648140383`*^9, {3.8517485281857347`*^9, 
    3.8517485619332514`*^9}, 3.8517486580512123`*^9, {3.8517513588686676`*^9, 
    3.8517514073309526`*^9}, {3.851751441541626*^9, 3.851751533068022*^9}, {
    3.851751605597808*^9, 3.851751650071472*^9}, {3.851751914649771*^9, 
    3.8517519306772113`*^9}, {3.8517539209566264`*^9, 3.851753921518944*^9}, {
    3.8517540049156313`*^9, 3.851754040623369*^9}, {3.8517541342577877`*^9, 
    3.851754134913883*^9}, {3.851755580791625*^9, 3.851755632282189*^9}, {
    3.85175566732077*^9, 3.85175576897163*^9}, {3.8517559092694125`*^9, 
    3.8517560125106993`*^9}, {3.851756148759842*^9, 3.8517561999442496`*^9}, {
    3.8517562786755133`*^9, 3.85175632121237*^9}, {3.85175638008928*^9, 
    3.8517564265781727`*^9}, {3.851756473982087*^9, 3.851756555509982*^9}, {
    3.8517565928446894`*^9, 3.851756625102707*^9}, {3.8517567124475203`*^9, 
    3.8517567340361834`*^9}, {3.851756821984413*^9, 3.8517568226248865`*^9}, {
    3.851756969730645*^9, 3.851757070910103*^9}, {3.851757110244399*^9, 
    3.851757111275406*^9}, {3.851757569353534*^9, 3.851757600992166*^9}, {
    3.851757676019738*^9, 3.85175767789157*^9}, {3.8517588302002554`*^9, 
    3.8517588878013997`*^9}, {3.851759072157569*^9, 3.85175907351406*^9}, {
    3.8517591552706633`*^9, 3.851759156705036*^9}, {3.851773137829807*^9, 
    3.851773169748623*^9}, {3.851773221229227*^9, 3.851773236357489*^9}, {
    3.8517733236279716`*^9, 3.8517733853129454`*^9}, {3.8517736188601284`*^9, 
    3.8517736258686404`*^9}, {3.8517737335668736`*^9, 3.851773738860039*^9}, 
    3.85177424731844*^9, {3.8517744746512675`*^9, 3.8517745447581444`*^9}, {
    3.851774585179755*^9, 3.851774618308499*^9}, {3.8517746807891307`*^9, 
    3.851774793080097*^9}, {3.851774873581607*^9, 3.8517749417219224`*^9}, {
    3.8517749856665754`*^9, 3.851775069507588*^9}, {3.8517774656545877`*^9, 
    3.851777466404437*^9}, {3.851777829092969*^9, 3.851777904166011*^9}, {
    3.8517781493109093`*^9, 3.8517782678252363`*^9}, {3.8517783179878016`*^9, 
    3.8517783821043415`*^9}, {3.85177841694917*^9, 3.851778454471308*^9}, {
    3.8517786093640203`*^9, 3.851778649402458*^9}, {3.851778683091739*^9, 
    3.851778693952546*^9}, 3.8517787333336506`*^9, {3.851778860073439*^9, 
    3.8517789122839394`*^9}, 3.851778952979082*^9, {3.8517791570067186`*^9, 
    3.8517791968098183`*^9}, {3.8517792312940693`*^9, 3.851779232715418*^9}, {
    3.8517792716194496`*^9, 3.851779379340855*^9}, {3.851779414021425*^9, 
    3.851779437226183*^9}, {3.8517794772943573`*^9, 3.8517795285549793`*^9}, 
    3.851779599409135*^9, {3.851947825131568*^9, 3.8519478397101264`*^9}, {
    3.8519479427752776`*^9, 3.851948080565038*^9}, {3.85194815725144*^9, 
    3.8519482112936525`*^9}, {3.8519482513071823`*^9, 3.851948300685818*^9}, {
    3.8519483467633505`*^9, 3.851948421926777*^9}, {3.854599917707138*^9, 
    3.854600013569354*^9}, {3.854712805139721*^9, 3.854712813811827*^9}, 
    3.85471512724292*^9, 3.8547154313136697`*^9, 3.854715541926668*^9, 
    3.854715944297141*^9, 3.8547754142715487`*^9, {3.8547755264962225`*^9, 
    3.8547755281675076`*^9}, {3.8547757270426426`*^9, 3.854775759334991*^9}, {
    3.8547757926492653`*^9, 3.85477579305542*^9}, {3.8547768647573757`*^9, 
    3.854776888796584*^9}, {3.8547769897774916`*^9, 3.854777019479389*^9}, {
    3.8547782128710985`*^9, 3.854778230252418*^9}, {3.8551982248697605`*^9, 
    3.855198277906287*^9}, {3.8551983360656457`*^9, 3.855198378165367*^9}, {
    3.855198503562776*^9, 3.855198531540599*^9}, {3.8551986228954463`*^9, 
    3.855198632533785*^9}, {3.8551987815217276`*^9, 3.855198791160095*^9}, {
    3.8552109863220525`*^9, 3.855210987618623*^9}, 3.855214762411118*^9, {
    3.856011846562994*^9, 3.856011846734826*^9}, 3.8560878091302457`*^9, 
    3.856087843090822*^9, {3.8560879184455433`*^9, 3.856087963059487*^9}, {
    3.8560880649683847`*^9, 3.856088202612194*^9}, 3.856088353238575*^9, {
    3.8560883909865675`*^9, 3.8560884115561733`*^9}, {3.8560884566794767`*^9, 
    3.856088466752247*^9}, {3.8560892251039495`*^9, 3.856089228351763*^9}, 
    3.8560897910955305`*^9, 3.856090309417139*^9, {3.8560904253453856`*^9, 
    3.8560904291870055`*^9}, {3.856091411499737*^9, 3.8560914171155396`*^9}, 
    3.8560914677276793`*^9, {3.8560929829811707`*^9, 
    3.8560930025763435`*^9}, {3.856093034916766*^9, 3.856093040136408*^9}, 
    3.8560936656415873`*^9, {3.8560946746845627`*^9, 3.8560947386523623`*^9}, 
    3.8560948723914704`*^9, {3.8560949180506277`*^9, 
    3.8560949209652853`*^9}, {3.8560949813293114`*^9, 
    3.8560949895195255`*^9}, {3.856096770884041*^9, 3.8560967982143965`*^9}, {
    3.8562662119601536`*^9, 3.8562662387117453`*^9}, {3.8562662738353577`*^9, 
    3.85626634798162*^9}, {3.8562664068280306`*^9, 3.8562664493400946`*^9}, {
    3.856266491656769*^9, 3.8562665542320075`*^9}, {3.8562666093858414`*^9, 
    3.856266616914109*^9}, 3.8562666503855114`*^9, 3.856266731222801*^9, {
    3.8562667623716664`*^9, 3.856266763340187*^9}, {3.856266817889781*^9, 
    3.8562669903836803`*^9}, {3.856267028970646*^9, 3.8562674280048995`*^9}, {
    3.856267489320221*^9, 3.8562675036762*^9}, {3.8562675747686973`*^9, 
    3.85626772736058*^9}, {3.856268275993417*^9, 3.856268308782513*^9}, {
    3.8562683880938034`*^9, 3.8562684345515585`*^9}, {3.856268464669392*^9, 
    3.856268483055673*^9}, {3.856268600184104*^9, 3.8562686093384027`*^9}, {
    3.8562686627942486`*^9, 3.8562686713562837`*^9}, {3.856268715189642*^9, 
    3.85626872318774*^9}, {3.8562688858849354`*^9, 3.8562689033964076`*^9}, {
    3.8562689706460557`*^9, 3.8562689783161087`*^9}, {3.8562690119511585`*^9, 
    3.856269027838032*^9}, {3.8562692047059155`*^9, 3.8562692060962067`*^9}, {
    3.8562692889079857`*^9, 3.8562692982027073`*^9}, {3.856269339677191*^9, 
    3.856269382573267*^9}, {3.856269415565442*^9, 3.856269435654676*^9}, {
    3.8562694723563094`*^9, 3.856269557617446*^9}, {3.856269592702757*^9, 
    3.8562695966393237`*^9}, {3.8562697389401054`*^9, 3.856269757199979*^9}, {
    3.8562698668960752`*^9, 3.8562698804551315`*^9}, 3.8562699452694855`*^9, {
    3.8562700055975056`*^9, 3.856270024858776*^9}, 3.856270062059145*^9, {
    3.8562701015654116`*^9, 3.856270107938883*^9}, {3.8562708100480924`*^9, 
    3.856270885842801*^9}, 3.856270961293467*^9, {3.8562711191233764`*^9, 
    3.8562711470871487`*^9}, {3.8562711940291367`*^9, 
    3.8562712004963613`*^9}, {3.8562712551100063`*^9, 
    3.8562712731059637`*^9}, {3.856271326739816*^9, 3.856271327005192*^9}, 
    3.8562715582179365`*^9, {3.85635050737883*^9, 3.8563505384237394`*^9}, {
    3.8563507814405966`*^9, 3.8563508153988123`*^9}, {3.856403365288825*^9, 
    3.8564033725059032`*^9}, 3.8564034328061533`*^9, {3.856403677833009*^9, 
    3.8564036865653663`*^9}, 3.856403890866742*^9, {3.8564041266115713`*^9, 
    3.8564041422014694`*^9}, 3.8564041731184883`*^9, {3.856416050425877*^9, 
    3.8564160637664623`*^9}, {3.856416280935495*^9, 3.856416287355866*^9}, {
    3.856416959202245*^9, 3.8564169628422403`*^9}, {3.8564170881878357`*^9, 
    3.8564170929365063`*^9}, {3.8564211371406746`*^9, 
    3.8564211381260867`*^9}, {3.8584271961336045`*^9, 3.858427205893742*^9}, 
    3.858429013129891*^9, {3.8584294949592237`*^9, 3.8584294959118695`*^9}, {
    3.858429584832994*^9, 3.8584295943151016`*^9}, 3.8584301369616175`*^9, {
    3.858430339552408*^9, 3.85843034217698*^9}, 3.8584315237909*^9, {
    3.8584315538161883`*^9, 3.858431583077695*^9}, {3.8586481763032894`*^9, 
    3.8586482132321167`*^9}, {3.8586482662196245`*^9, 
    3.8586482788262625`*^9}, {3.8586520958274355`*^9, 
    3.8586520974052067`*^9}, {3.8586521767410717`*^9, 
    3.8586522948195953`*^9}, {3.858652332447443*^9, 3.8586523344626207`*^9}, {
    3.8586524266083574`*^9, 3.858652428795418*^9}, {3.858652466641944*^9, 
    3.8586524687664547`*^9}, 3.858652635278686*^9, 3.8586526698572216`*^9, {
    3.8586527015549583`*^9, 3.8586527915947876`*^9}, {3.8586528245985355`*^9, 
    3.858652908923914*^9}, {3.8586530994435596`*^9, 3.858653197242655*^9}, {
    3.8586532352464437`*^9, 3.8586532454784384`*^9}, {3.8586534506699677`*^9, 
    3.8586535085142584`*^9}, {3.858653623629122*^9, 3.8586536312142105`*^9}, {
    3.8586545877607684`*^9, 3.858654593790846*^9}, {3.858654662936039*^9, 
    3.8586546703699636`*^9}, {3.8586551608986635`*^9, 3.858655207035569*^9}, {
    3.8586552560515184`*^9, 3.858655256691988*^9}, {3.858655294051999*^9, 
    3.8586552945676804`*^9}, {3.8586553251959395`*^9, 3.858655329055599*^9}, {
    3.8586554034905972`*^9, 3.8586554039594183`*^9}, {3.8586562167494545`*^9, 
    3.8586562419891367`*^9}, {3.858656345853464*^9, 3.8586563472281446`*^9}, {
    3.85865642554783*^9, 3.8586564274223795`*^9}, 3.858656609260376*^9, {
    3.8586567791800585`*^9, 3.8586567938415623`*^9}, {3.858656843604476*^9, 
    3.8586568448541813`*^9}, 3.858657264350212*^9, 3.8586578643727827`*^9, {
    3.8586603501435423`*^9, 3.8586603610776873`*^9}, {3.858665299710614*^9, 
    3.858665304568842*^9}, {3.85866660066634*^9, 3.858666631320428*^9}, 
    3.8588324708255205`*^9, 3.858834680023713*^9, {3.858834816319806*^9, 
    3.8588348245678115`*^9}, {3.859371068746986*^9, 3.859371071760897*^9}, {
    3.859371119092376*^9, 3.859371120263667*^9}, {3.86058476409734*^9, 
    3.860584765722186*^9}, {3.860584841536561*^9, 3.8605848473633127`*^9}, {
    3.860584881556029*^9, 3.8605849345190516`*^9}, {3.8605849810705805`*^9, 
    3.860585005457756*^9}, {3.8605850393795395`*^9, 3.8605850418789215`*^9}, {
    3.8605851656060953`*^9, 3.860585194270255*^9}, 3.86063381286031*^9, {
    3.860633853041381*^9, 3.8606338605381393`*^9}, {3.86063401668987*^9, 
    3.8606340194591556`*^9}, {3.8606344973969564`*^9, 
    3.8606345323857527`*^9}, {3.8606351162938786`*^9, 
    3.8606351169534793`*^9}, {3.860635337183052*^9, 3.860635337760549*^9}, {
    3.8606415668765078`*^9, 3.860641595432556*^9}, {3.8606478264186707`*^9, 
    3.860647827262169*^9}, {3.860652123064255*^9, 3.8606521235797577`*^9}, {
    3.860652155786443*^9, 3.8606521736104174`*^9}, 3.8606522667603283`*^9, {
    3.8606696247237062`*^9, 3.8606696733079042`*^9}, {3.860669722427417*^9, 
    3.860669749858634*^9}, {3.8606698523428307`*^9, 3.8606698539051495`*^9}, {
    3.860670121437567*^9, 3.860670162149023*^9}, {3.860670218651143*^9, 
    3.8606702191509986`*^9}, {3.860670257720063*^9, 3.8606702608755703`*^9}, 
    3.860670357321578*^9, {3.8608393202951083`*^9, 3.860839327144682*^9}, {
    3.8608395360225525`*^9, 3.860839568560756*^9}, {3.860839626109659*^9, 
    3.8608396316532125`*^9}, {3.860839972322068*^9, 3.8608399940349*^9}, {
    3.8608404196123*^9, 3.860840428309719*^9}, {3.860840480919987*^9, 
    3.860840481588693*^9}, {3.860840536412998*^9, 3.8608405379998827`*^9}, {
    3.860840633619918*^9, 3.8608406562135906`*^9}, {3.8608407583448086`*^9, 
    3.86084082336386*^9}, {3.8608409345127068`*^9, 3.8608409351678333`*^9}, {
    3.86084105988897*^9, 3.8608410940155354`*^9}, {3.8608413360670547`*^9, 
    3.8608413526004543`*^9}, {3.860841580986247*^9, 3.8608416011112056`*^9}, {
    3.8608422038020997`*^9, 3.860842221049014*^9}, {3.861189494194888*^9, 
    3.861189496865979*^9}, {3.86119056512847*^9, 3.8611905745824733`*^9}, {
    3.8623951441743917`*^9, 3.862395332697236*^9}, 3.8623954053114996`*^9, {
    3.8623954515841923`*^9, 3.862395460222004*^9}, {3.8623954945791407`*^9, 
    3.8623955137183037`*^9}, {3.8752349401678534`*^9, 3.875234961536339*^9}, 
    3.875235172904148*^9, {3.8752352398820295`*^9, 3.875235316197029*^9}, {
    3.8752353506019335`*^9, 3.8752353807075663`*^9}, {3.875235414389227*^9, 
    3.8752354566803694`*^9}, {3.875235529313761*^9, 3.8752355300012703`*^9}, {
    3.87523563456826*^9, 3.8752356645246763`*^9}, {3.875235707223446*^9, 
    3.8752359593024373`*^9}, {3.8752359934424667`*^9, 3.875236049310521*^9}, {
    3.875236294987774*^9, 3.8752363050000896`*^9}, {3.875236383458136*^9, 
    3.8752364461073356`*^9}, {3.8752364788558893`*^9, 
    3.8752365706212935`*^9}, {3.875236707214814*^9, 3.875236709583338*^9}, {
    3.8752367641977963`*^9, 3.875236843994796*^9}, {3.875236896011919*^9, 
    3.875237166046666*^9}, {3.875237235531037*^9, 3.875237251461103*^9}, {
    3.8752372851071124`*^9, 3.875237299220729*^9}, {3.8752373346031885`*^9, 
    3.875237339867747*^9}, {3.875237376370146*^9, 3.875237532572172*^9}, {
    3.8752376224386363`*^9, 3.875237718894716*^9}, {3.875237760346624*^9, 
    3.875237774849938*^9}, {3.8752378624652424`*^9, 3.875237867705207*^9}, {
    3.8752380915617523`*^9, 3.8752380974494762`*^9}, {3.8752381451223817`*^9, 
    3.8752382219509845`*^9}, {3.8752384878004336`*^9, 3.875238517872681*^9}, 
    3.875238560792837*^9, {3.875238604702647*^9, 3.875238617957013*^9}, {
    3.875238737909627*^9, 3.875238748027789*^9}, {3.8753544661404305`*^9, 
    3.8753546174521494`*^9}, {3.875354653831521*^9, 3.8753546885927687`*^9}, {
    3.875365200482809*^9, 3.8753653714892845`*^9}, {3.8753654565315585`*^9, 
    3.8753655107946672`*^9}},ExpressionUUID->
  "39506507-ed93-47ae-abf9-daa388ea9329"],
 Cell[BoxData[
  RowBox[{
   SubscriptBox[
    StyleBox["k",
     FontSlant->"Italic"], "c"], " ", "\[RightArrow]", " ", 
   RowBox[{"\[Infinity]", " ", "and", " ", 
    SubscriptBox[
     StyleBox["k",
      FontSlant->"Italic"], "f"]}], " ", "\[RightArrow]", " ", 
   RowBox[{"\[Infinity]", "."}]}]],
  CellChangeTimes->{{3.841749732856798*^9, 3.841749906918338*^9}, {
    3.841750053788534*^9, 3.8417500568715334`*^9}, {3.8418036925935926`*^9, 
    3.841803706752474*^9}, {3.8418037607203846`*^9, 3.841803774188929*^9}, {
    3.8418038073567395`*^9, 3.8418038499275484`*^9}, 3.841803904405038*^9, {
    3.8418053228201857`*^9, 3.841805323938447*^9}, {3.841805430221315*^9, 
    3.841805430784861*^9}, {3.8418056712220964`*^9, 3.8418056725014286`*^9}, {
    3.841836424378595*^9, 3.8418364269817724`*^9}, {3.8418867914336452`*^9, 
    3.841886853106645*^9}, {3.841886891238326*^9, 3.8418869414298725`*^9}, {
    3.8418871779836135`*^9, 3.8418871986816463`*^9}, {3.8418872411875305`*^9, 
    3.841887251013095*^9}, {3.84188731368587*^9, 3.8418873297914915`*^9}, {
    3.8418874752412233`*^9, 3.8418874765690117`*^9}, 3.8418875913857713`*^9, {
    3.841887944680502*^9, 3.841888206986114*^9}, {3.8418882799062786`*^9, 
    3.8418882862487326`*^9}, {3.8418883519361906`*^9, 3.841888407829341*^9}, {
    3.8418884538187127`*^9, 3.8418884964492006`*^9}, {3.8420104553380365`*^9, 
    3.842010456105392*^9}, {3.842010501475397*^9, 3.8420105017222424`*^9}, 
    3.8420105393949304`*^9, {3.8466571293324575`*^9, 
    3.8466571443435946`*^9}, {3.846657370778998*^9, 3.8466574869332204`*^9}, {
    3.846657601401836*^9, 3.846657689884245*^9}, 3.846658199217289*^9, {
    3.8466582422685738`*^9, 3.8466583553051624`*^9}, {3.8466583890306325`*^9, 
    3.846658445869364*^9}, {3.8466587017050686`*^9, 3.846658727875573*^9}, {
    3.8466589044445233`*^9, 3.846658923562812*^9}, {3.8466590107398157`*^9, 
    3.846659080311597*^9}, {3.846659127976855*^9, 3.846659128101828*^9}, {
    3.8466591912168427`*^9, 3.8466592481487646`*^9}, {3.8466594766550484`*^9, 
    3.846659533599231*^9}, {3.84665958437168*^9, 3.846659863675767*^9}, {
    3.8466598938799286`*^9, 3.846660059514933*^9}, {3.846669158921476*^9, 
    3.846669160540101*^9}, {3.846669210254387*^9, 3.8466695226397595`*^9}, {
    3.8466696739300594`*^9, 3.846669700555784*^9}, {3.846669733667065*^9, 
    3.846669830943153*^9}, {3.846669942941931*^9, 3.846669970183852*^9}, {
    3.8466700023530407`*^9, 3.846670003337158*^9}, {3.846670285534099*^9, 
    3.8466702962801914`*^9}, 3.846670457513308*^9, {3.846670500562671*^9, 
    3.8466705275347214`*^9}, {3.8466707719949465`*^9, 
    3.8466708730671043`*^9}, {3.8466709531558485`*^9, 
    3.8466710349452095`*^9}, {3.8466710720817604`*^9, 3.84667111103518*^9}, {
    3.8466711412342763`*^9, 3.8466712050839252`*^9}, {3.846671240711611*^9, 
    3.846671300266326*^9}, {3.846671342372938*^9, 3.8466714524283266`*^9}, {
    3.8466715047371726`*^9, 3.846671713659568*^9}, {3.8466722931171083`*^9, 
    3.8466723395722675`*^9}, 3.846672384048112*^9, {3.846739969188094*^9, 
    3.846739972171768*^9}, 3.846745658041407*^9, 3.846746398433676*^9, {
    3.846764496223112*^9, 3.846764552952351*^9}, {3.8472766347056165`*^9, 
    3.847276669849394*^9}, {3.847276713138187*^9, 3.847276721757236*^9}, {
    3.8472770823160067`*^9, 3.8472771436873293`*^9}, {3.847277313528089*^9, 
    3.8472773203345337`*^9}, {3.847277416301323*^9, 3.8472774310812693`*^9}, {
    3.8472774750157623`*^9, 3.847277479177511*^9}, {3.8472775316318893`*^9, 
    3.8472775758940177`*^9}, {3.8472776543078303`*^9, 
    3.8472776815826125`*^9}, {3.8472820829125304`*^9, 3.847282101713642*^9}, {
    3.847282202644628*^9, 3.8472822104353604`*^9}, {3.847282267459462*^9, 
    3.847282310564173*^9}, {3.8472823596584167`*^9, 3.847282370012159*^9}, {
    3.84728242923578*^9, 3.847282460379707*^9}, 3.8472825661218014`*^9, {
    3.847282602620706*^9, 3.847282614768936*^9}, {3.847335149022919*^9, 
    3.8473351951998057`*^9}, {3.847335255588388*^9, 3.8473352622853622`*^9}, 
    3.847335299620603*^9, {3.847335579443143*^9, 3.847335608350524*^9}, {
    3.8473356424322844`*^9, 3.84733571358677*^9}, {3.8473357501219473`*^9, 
    3.8473359066759663`*^9}, {3.847336046522848*^9, 3.847336053503533*^9}, {
    3.8473361964772964`*^9, 3.847336200021795*^9}, {3.8473362736531377`*^9, 
    3.847336288747509*^9}, {3.8473481034081535`*^9, 3.8473481111240797`*^9}, {
    3.848382018287554*^9, 3.8483820505924406`*^9}, {3.8483820856130686`*^9, 
    3.8483821106696844`*^9}, {3.848382145520816*^9, 3.8483821466143074`*^9}, 
    3.848382193853175*^9, {3.8483823158244123`*^9, 3.8483823864694166`*^9}, {
    3.8483824661294794`*^9, 3.848382489858067*^9}, {3.848382561091242*^9, 
    3.848382564293646*^9}, {3.851685314669648*^9, 3.8516853345712028`*^9}, {
    3.851685467649209*^9, 3.8516855020422287`*^9}, {3.8516869238465166`*^9, 
    3.85168695982136*^9}, {3.8516872104938073`*^9, 3.8516872120405083`*^9}, {
    3.851687248756606*^9, 3.8516872707514334`*^9}, {3.8516878641505013`*^9, 
    3.8516880498282366`*^9}, {3.8516882835180893`*^9, 3.851688291032139*^9}, {
    3.851688381385642*^9, 3.85168840174336*^9}, {3.851688516903908*^9, 
    3.8516885512922974`*^9}, 3.8516888509872847`*^9, {3.8516890734305644`*^9, 
    3.8516890753207664`*^9}, 3.8517484648140383`*^9, {3.8517485281857347`*^9, 
    3.8517485619332514`*^9}, 3.8517486580512123`*^9, {3.8517513588686676`*^9, 
    3.8517514073309526`*^9}, {3.851751441541626*^9, 3.851751533068022*^9}, {
    3.851751605597808*^9, 3.851751650071472*^9}, {3.851751914649771*^9, 
    3.8517519306772113`*^9}, {3.8517539209566264`*^9, 3.851753921518944*^9}, {
    3.8517540049156313`*^9, 3.851754040623369*^9}, {3.8517541342577877`*^9, 
    3.851754134913883*^9}, {3.851755580791625*^9, 3.851755632282189*^9}, {
    3.85175566732077*^9, 3.85175576897163*^9}, {3.8517559092694125`*^9, 
    3.8517560125106993`*^9}, {3.851756148759842*^9, 3.8517561999442496`*^9}, {
    3.8517562786755133`*^9, 3.85175632121237*^9}, {3.85175638008928*^9, 
    3.8517564265781727`*^9}, {3.851756473982087*^9, 3.851756555509982*^9}, {
    3.8517565928446894`*^9, 3.851756625102707*^9}, {3.8517567124475203`*^9, 
    3.8517567340361834`*^9}, {3.851756821984413*^9, 3.8517568226248865`*^9}, {
    3.851756969730645*^9, 3.851757070910103*^9}, {3.851757110244399*^9, 
    3.851757111275406*^9}, {3.851757569353534*^9, 3.851757600992166*^9}, {
    3.851757676019738*^9, 3.85175767789157*^9}, {3.8517588302002554`*^9, 
    3.8517588878013997`*^9}, {3.851759072157569*^9, 3.85175907351406*^9}, {
    3.8517591552706633`*^9, 3.851759156705036*^9}, {3.851773137829807*^9, 
    3.851773169748623*^9}, {3.851773221229227*^9, 3.851773236357489*^9}, {
    3.8517733236279716`*^9, 3.8517733853129454`*^9}, {3.8517736188601284`*^9, 
    3.8517736258686404`*^9}, {3.8517737335668736`*^9, 3.851773738860039*^9}, 
    3.85177424731844*^9, {3.8517744746512675`*^9, 3.8517745447581444`*^9}, {
    3.851774585179755*^9, 3.851774618308499*^9}, {3.8517746807891307`*^9, 
    3.851774793080097*^9}, {3.851774873581607*^9, 3.8517749417219224`*^9}, {
    3.8517749856665754`*^9, 3.851775069507588*^9}, {3.8517774656545877`*^9, 
    3.851777466404437*^9}, {3.851777829092969*^9, 3.851777904166011*^9}, {
    3.8517781493109093`*^9, 3.8517782678252363`*^9}, {3.8517783179878016`*^9, 
    3.8517783821043415`*^9}, {3.85177841694917*^9, 3.851778454471308*^9}, {
    3.8517786093640203`*^9, 3.851778649402458*^9}, {3.851778683091739*^9, 
    3.851778693952546*^9}, 3.8517787333336506`*^9, {3.851778860073439*^9, 
    3.8517789122839394`*^9}, 3.851778952979082*^9, {3.8517791570067186`*^9, 
    3.8517791968098183`*^9}, {3.8517792312940693`*^9, 3.851779232715418*^9}, {
    3.8517792716194496`*^9, 3.851779379340855*^9}, {3.851779414021425*^9, 
    3.851779437226183*^9}, {3.8517794772943573`*^9, 3.8517795285549793`*^9}, 
    3.851779599409135*^9, {3.851947825131568*^9, 3.8519478397101264`*^9}, {
    3.8519479427752776`*^9, 3.851948080565038*^9}, {3.85194815725144*^9, 
    3.8519482112936525`*^9}, {3.8519482513071823`*^9, 3.851948300685818*^9}, {
    3.8519483467633505`*^9, 3.851948421926777*^9}, {3.854599917707138*^9, 
    3.854600013569354*^9}, {3.854712805139721*^9, 3.854712813811827*^9}, 
    3.85471512724292*^9, 3.8547154313136697`*^9, 3.854715541926668*^9, 
    3.854715944297141*^9, 3.8547754142715487`*^9, {3.8547755264962225`*^9, 
    3.8547755281675076`*^9}, {3.8547757270426426`*^9, 3.854775759334991*^9}, {
    3.8547757926492653`*^9, 3.85477579305542*^9}, {3.8547768647573757`*^9, 
    3.854776888796584*^9}, {3.8547769897774916`*^9, 3.854777019479389*^9}, {
    3.8547782128710985`*^9, 3.854778230252418*^9}, {3.8551982248697605`*^9, 
    3.855198277906287*^9}, {3.8551983360656457`*^9, 3.855198378165367*^9}, {
    3.855198503562776*^9, 3.855198531540599*^9}, {3.8551986228954463`*^9, 
    3.855198632533785*^9}, {3.8551987815217276`*^9, 3.855198791160095*^9}, {
    3.8552109863220525`*^9, 3.855210987618623*^9}, 3.855214762411118*^9, {
    3.856011846562994*^9, 3.856011846734826*^9}, 3.8560878091302457`*^9, 
    3.856087843090822*^9, {3.8560879184455433`*^9, 3.856087963059487*^9}, {
    3.8560880649683847`*^9, 3.856088202612194*^9}, 3.856088353238575*^9, {
    3.8560883909865675`*^9, 3.8560884115561733`*^9}, {3.8560884566794767`*^9, 
    3.856088466752247*^9}, {3.8560892251039495`*^9, 3.856089228351763*^9}, 
    3.8560897910955305`*^9, 3.856090309417139*^9, {3.8560904253453856`*^9, 
    3.8560904291870055`*^9}, {3.856091411499737*^9, 3.8560914171155396`*^9}, 
    3.8560914677276793`*^9, {3.8560929829811707`*^9, 
    3.8560930025763435`*^9}, {3.856093034916766*^9, 3.856093040136408*^9}, 
    3.8560936656415873`*^9, {3.8560946746845627`*^9, 3.8560947386523623`*^9}, 
    3.8560948723914704`*^9, {3.8560949180506277`*^9, 
    3.8560949209652853`*^9}, {3.8560949813293114`*^9, 
    3.8560949895195255`*^9}, {3.856096770884041*^9, 3.8560967982143965`*^9}, {
    3.8562662119601536`*^9, 3.8562662387117453`*^9}, {3.8562662738353577`*^9, 
    3.85626634798162*^9}, {3.8562664068280306`*^9, 3.8562664493400946`*^9}, {
    3.856266491656769*^9, 3.8562665542320075`*^9}, {3.8562666093858414`*^9, 
    3.856266616914109*^9}, 3.8562666503855114`*^9, 3.856266731222801*^9, {
    3.8562667623716664`*^9, 3.856266763340187*^9}, {3.856266817889781*^9, 
    3.8562669903836803`*^9}, {3.856267028970646*^9, 3.8562674280048995`*^9}, {
    3.856267489320221*^9, 3.8562675036762*^9}, {3.8562675747686973`*^9, 
    3.85626772736058*^9}, {3.856268275993417*^9, 3.856268308782513*^9}, {
    3.8562683880938034`*^9, 3.8562684345515585`*^9}, {3.856268464669392*^9, 
    3.856268483055673*^9}, {3.856268600184104*^9, 3.8562686093384027`*^9}, {
    3.8562686627942486`*^9, 3.8562686713562837`*^9}, {3.856268715189642*^9, 
    3.85626872318774*^9}, {3.8562688858849354`*^9, 3.8562689033964076`*^9}, {
    3.8562689706460557`*^9, 3.8562689783161087`*^9}, {3.8562690119511585`*^9, 
    3.856269027838032*^9}, {3.8562692047059155`*^9, 3.8562692060962067`*^9}, {
    3.8562692889079857`*^9, 3.8562692982027073`*^9}, {3.856269339677191*^9, 
    3.856269382573267*^9}, {3.856269415565442*^9, 3.856269435654676*^9}, {
    3.8562694723563094`*^9, 3.856269557617446*^9}, {3.856269592702757*^9, 
    3.8562695966393237`*^9}, {3.8562697389401054`*^9, 3.856269757199979*^9}, {
    3.8562698668960752`*^9, 3.8562698804551315`*^9}, 3.8562699452694855`*^9, {
    3.8562700055975056`*^9, 3.856270024858776*^9}, 3.856270062059145*^9, {
    3.8562701015654116`*^9, 3.856270107938883*^9}, {3.8562708100480924`*^9, 
    3.856270885842801*^9}, 3.856270961293467*^9, {3.8562711191233764`*^9, 
    3.8562711470871487`*^9}, {3.8562711940291367`*^9, 
    3.8562712004963613`*^9}, {3.8562712551100063`*^9, 
    3.8562712731059637`*^9}, {3.856271326739816*^9, 3.856271327005192*^9}, 
    3.8562715582179365`*^9, {3.85635050737883*^9, 3.8563505384237394`*^9}, {
    3.8563507814405966`*^9, 3.8563508153988123`*^9}, {3.856403365288825*^9, 
    3.8564033725059032`*^9}, 3.8564034328061533`*^9, {3.856403677833009*^9, 
    3.8564036865653663`*^9}, 3.856403890866742*^9, {3.8564041266115713`*^9, 
    3.8564041422014694`*^9}, 3.8564041731184883`*^9, {3.856416050425877*^9, 
    3.8564160637664623`*^9}, {3.856416280935495*^9, 3.856416287355866*^9}, {
    3.856416959202245*^9, 3.8564169628422403`*^9}, {3.8564170881878357`*^9, 
    3.8564170929365063`*^9}, {3.8564211371406746`*^9, 
    3.8564211381260867`*^9}, {3.8584271961336045`*^9, 3.858427205893742*^9}, 
    3.858429013129891*^9, {3.8584294949592237`*^9, 3.8584294959118695`*^9}, {
    3.858429584832994*^9, 3.8584295943151016`*^9}, 3.8584301369616175`*^9, {
    3.858430339552408*^9, 3.85843034217698*^9}, 3.8584315237909*^9, {
    3.8584315538161883`*^9, 3.858431583077695*^9}, {3.8586481763032894`*^9, 
    3.8586482132321167`*^9}, {3.8586482662196245`*^9, 
    3.8586482788262625`*^9}, {3.8586520958274355`*^9, 
    3.8586520974052067`*^9}, {3.8586521767410717`*^9, 
    3.8586522948195953`*^9}, {3.858652332447443*^9, 3.8586523344626207`*^9}, {
    3.8586524266083574`*^9, 3.858652428795418*^9}, {3.858652466641944*^9, 
    3.8586524687664547`*^9}, 3.858652635278686*^9, 3.8586526698572216`*^9, {
    3.8586527015549583`*^9, 3.8586527915947876`*^9}, {3.8586528245985355`*^9, 
    3.858652908923914*^9}, {3.8586530994435596`*^9, 3.858653197242655*^9}, {
    3.8586532352464437`*^9, 3.8586532454784384`*^9}, {3.8586534506699677`*^9, 
    3.8586535085142584`*^9}, {3.858653623629122*^9, 3.8586536312142105`*^9}, {
    3.8586545877607684`*^9, 3.858654593790846*^9}, {3.858654662936039*^9, 
    3.8586546703699636`*^9}, {3.8586551608986635`*^9, 3.858655207035569*^9}, {
    3.8586552560515184`*^9, 3.858655256691988*^9}, {3.858655294051999*^9, 
    3.8586552945676804`*^9}, {3.8586553251959395`*^9, 3.858655329055599*^9}, {
    3.8586554034905972`*^9, 3.8586554039594183`*^9}, {3.8586562167494545`*^9, 
    3.8586562419891367`*^9}, {3.858656345853464*^9, 3.8586563472281446`*^9}, {
    3.85865642554783*^9, 3.8586564274223795`*^9}, 3.858656609260376*^9, {
    3.8586567791800585`*^9, 3.8586567938415623`*^9}, {3.858656843604476*^9, 
    3.8586568448541813`*^9}, 3.858657264350212*^9, 3.8586578643727827`*^9, {
    3.8586603501435423`*^9, 3.8586603610776873`*^9}, {3.858665299710614*^9, 
    3.858665304568842*^9}, {3.85866660066634*^9, 3.858666631320428*^9}, 
    3.8588324708255205`*^9, 3.858834680023713*^9, {3.858834816319806*^9, 
    3.8588348245678115`*^9}, {3.859371068746986*^9, 3.859371071760897*^9}, {
    3.859371119092376*^9, 3.859371120263667*^9}, {3.86058476409734*^9, 
    3.860584765722186*^9}, {3.860584841536561*^9, 3.8605848473633127`*^9}, {
    3.860584881556029*^9, 3.8605849345190516`*^9}, {3.8605849810705805`*^9, 
    3.860585005457756*^9}, {3.8605850393795395`*^9, 3.8605850418789215`*^9}, {
    3.8605851656060953`*^9, 3.860585194270255*^9}, 3.86063381286031*^9, {
    3.860633853041381*^9, 3.8606338605381393`*^9}, {3.86063401668987*^9, 
    3.8606340194591556`*^9}, {3.8606344973969564`*^9, 
    3.8606345323857527`*^9}, {3.8606351162938786`*^9, 
    3.8606351169534793`*^9}, {3.860635337183052*^9, 3.860635337760549*^9}, {
    3.8606415668765078`*^9, 3.860641595432556*^9}, {3.8606478264186707`*^9, 
    3.860647827262169*^9}, {3.860652123064255*^9, 3.8606521235797577`*^9}, {
    3.860652155786443*^9, 3.8606521736104174`*^9}, 3.8606522667603283`*^9, {
    3.8606696247237062`*^9, 3.8606696733079042`*^9}, {3.860669722427417*^9, 
    3.860669749858634*^9}, {3.8606698523428307`*^9, 3.8606698539051495`*^9}, {
    3.860670121437567*^9, 3.860670162149023*^9}, {3.860670218651143*^9, 
    3.8606702191509986`*^9}, {3.860670257720063*^9, 3.8606702608755703`*^9}, 
    3.860670357321578*^9, {3.8608393202951083`*^9, 3.860839327144682*^9}, {
    3.8608395360225525`*^9, 3.860839568560756*^9}, {3.860839626109659*^9, 
    3.8608396316532125`*^9}, {3.860839972322068*^9, 3.8608399940349*^9}, {
    3.8608404196123*^9, 3.860840428309719*^9}, {3.860840480919987*^9, 
    3.860840481588693*^9}, {3.860840536412998*^9, 3.8608405379998827`*^9}, {
    3.860840633619918*^9, 3.8608406562135906`*^9}, {3.8608407583448086`*^9, 
    3.86084082336386*^9}, {3.8608409345127068`*^9, 3.8608409351678333`*^9}, {
    3.86084105988897*^9, 3.8608410940155354`*^9}, {3.8608413360670547`*^9, 
    3.8608413526004543`*^9}, {3.860841580986247*^9, 3.8608416011112056`*^9}, {
    3.8608422038020997`*^9, 3.860842221049014*^9}, {3.861189494194888*^9, 
    3.861189496865979*^9}, {3.86119056512847*^9, 3.8611905745824733`*^9}, {
    3.8623951441743917`*^9, 3.862395332697236*^9}, 3.8623954053114996`*^9, {
    3.8623954515841923`*^9, 3.862395460222004*^9}, {3.8623954945791407`*^9, 
    3.8623955137183037`*^9}, {3.8752349401678534`*^9, 3.875234961536339*^9}, 
    3.875235172904148*^9, {3.8752352398820295`*^9, 3.875235316197029*^9}, {
    3.8752353506019335`*^9, 3.8752353807075663`*^9}, {3.875235414389227*^9, 
    3.8752354566803694`*^9}, {3.875235529313761*^9, 3.8752355300012703`*^9}, {
    3.87523563456826*^9, 3.8752356645246763`*^9}, {3.875235707223446*^9, 
    3.8752359593024373`*^9}, {3.8752359934424667`*^9, 3.875236049310521*^9}, {
    3.875236294987774*^9, 3.8752363050000896`*^9}, {3.875236383458136*^9, 
    3.8752364461073356`*^9}, {3.8752364788558893`*^9, 
    3.8752365706212935`*^9}, {3.875236707214814*^9, 3.875236709583338*^9}, {
    3.8752367641977963`*^9, 3.875236843994796*^9}, {3.875236896011919*^9, 
    3.875237166046666*^9}, {3.875237235531037*^9, 3.875237251461103*^9}, {
    3.8752372851071124`*^9, 3.875237299220729*^9}, {3.8752373346031885`*^9, 
    3.875237339867747*^9}, {3.875237376370146*^9, 3.875237532572172*^9}, {
    3.8752376224386363`*^9, 3.875237718894716*^9}, {3.875237760346624*^9, 
    3.875237774849938*^9}, {3.8752378624652424`*^9, 3.875237867705207*^9}, {
    3.8752380915617523`*^9, 3.8752380974494762`*^9}, {3.8752381451223817`*^9, 
    3.8752382219509845`*^9}, {3.8752384878004336`*^9, 3.875238517872681*^9}, 
    3.875238560792837*^9, {3.875238604702647*^9, 3.875238617957013*^9}, {
    3.875238737909627*^9, 3.875238748027789*^9}, {3.8753544661404305`*^9, 
    3.8753546174521494`*^9}, {3.875354653831521*^9, 3.8753546885927687`*^9}, {
    3.875365200482809*^9, 3.8753653714892845`*^9}, {3.8753654565315585`*^9, 
    3.8753655107946672`*^9}},ExpressionUUID->
  "7026f9e9-cc5d-4172-b4d5-6ce33958e5e3"]
}], "Subsection",
 CellChangeTimes->{
  3.8753669644399815`*^9, {3.8753670335400515`*^9, 3.875367090589787*^9}, {
   3.875407932627271*^9, 3.8754079471538987`*^9}, {3.8754083426137085`*^9, 
   3.8754083455977287`*^9}, {3.8755353546700697`*^9, 
   3.8755353546700697`*^9}, {3.875537637552716*^9, 3.875537685945177*^9}, {
   3.8755394347274957`*^9, 3.8755394354159236`*^9}, {3.8755881451020203`*^9, 
   3.875588197564426*^9}, {3.8755882350758295`*^9, 3.8755882504316945`*^9}, {
   3.8755886429242334`*^9, 
   3.875588773993381*^9}},ExpressionUUID->"95d97992-9729-40f2-bb00-\
494dbb07bca4"],

Cell[CellGroupData[{

Cell[TextData[{
 StyleBox["Figure S1A, C & E (Mathematics-1964681)",
  FontWeight->"Bold"],
 ". Representative numerical (dashed lines, subscript ns) and analytical \
(solid lines, subscript ss) solutions of the time-dependent variation of (A & \
C) the concentration for the substrate A, the products P and Q, and the two \
active enzyme states E and F and (E) the reaction rate for A, P and Q of an \
enzyme-catalyzed ping-pong reaction. The substrate A follows \
disproportionation and the accumulation of the intermediate substrate-enzyme \
complexes EA and FA is negligible. For the analytical solution, E and F were \
assumed to be in steady-state.\n"
}], "Subsubsection",
 CellChangeTimes->{
  3.8753669850694046`*^9, {3.875367125478444*^9, 3.875367178332805*^9}, 
   3.8754080311904435`*^9, {3.8754080620089025`*^9, 3.875408115512653*^9}, {
   3.875538196584683*^9, 3.875538197888897*^9}, {3.875588017343777*^9, 
   3.8755880260938425`*^9}, 3.875588092128742*^9, {3.875588131356024*^9, 
   3.875588132780794*^9}, {3.875767539049509*^9, 3.875767548191929*^9}, {
   3.875767663011945*^9, 3.8757677554663982`*^9}, {3.8764973093439684`*^9, 
   3.8764973344639206`*^9}},ExpressionUUID->"ff8420d5-4d48-4eff-aeb3-\
feed7e6e1f08"],

Cell[CellGroupData[{

Cell[BoxData[{
 RowBox[{
  RowBox[{
   RowBox[{"-", 
    RowBox[{
     RowBox[{"cA", "'"}], "[", "t", "]"}]}], "\[Equal]", 
   RowBox[{
    RowBox[{"ka", "*", 
     RowBox[{"cA", "[", "t", "]"}], "*", 
     RowBox[{"cE", "[", "t", "]"}]}], "+", 
    RowBox[{"kd", "*", 
     RowBox[{"cA", "[", "t", "]"}], "*", 
     RowBox[{"cF", "[", "t", "]"}]}]}]}], "/.", 
  RowBox[{
   RowBox[{"cF", "[", "t", "]"}], "\[Rule]", 
   RowBox[{"cEo", "-", 
    RowBox[{"cE", "[", "t", "]"}]}]}]}], "\[IndentingNewLine]", 
 RowBox[{
  RowBox[{
   RowBox[{"-", 
    RowBox[{
     RowBox[{"cE", "'"}], "[", "t", "]"}]}], "\[Equal]", 
   RowBox[{
    RowBox[{"ka", "*", 
     RowBox[{"cA", "[", "t", "]"}], "*", 
     RowBox[{"cE", "[", "t", "]"}]}], "-", 
    RowBox[{"kd", "*", 
     RowBox[{"cA", "[", "t", "]"}], "*", 
     RowBox[{"cF", "[", "t", "]"}]}]}]}], "/.", 
  RowBox[{
   RowBox[{"cF", "[", "t", "]"}], "\[Rule]", 
   RowBox[{"cEo", "-", 
    RowBox[{"cE", "[", "t", "]"}]}]}]}], "\[IndentingNewLine]", 
 RowBox[{
  RowBox[{
   RowBox[{
    RowBox[{"cF", "'"}], "[", "t", "]"}], "\[Equal]", 
   RowBox[{
    RowBox[{"ka", "*", 
     RowBox[{"cA", "[", "t", "]"}], "*", 
     RowBox[{"cE", "[", "t", "]"}]}], "-", 
    RowBox[{"kd", "*", 
     RowBox[{"cA", "[", "t", "]"}], "*", 
     RowBox[{"cF", "[", "t", "]"}]}]}]}], "/.", 
  RowBox[{"{", 
   RowBox[{
    RowBox[{
     RowBox[{
      RowBox[{"cF", "'"}], "[", "t", "]"}], "\[Rule]", 
     RowBox[{"-", 
      RowBox[{
       RowBox[{"cE", "'"}], "[", "t", "]"}]}]}], ",", 
    RowBox[{
     RowBox[{"cF", "[", "t", "]"}], "\[Rule]", 
     RowBox[{"cEo", "-", 
      RowBox[{"cE", "[", "t", "]"}]}]}]}], "}"}]}]}], "Input",
 CellChangeTimes->{3.875588974954579*^9},
 CellLabel->"In[3]:=",ExpressionUUID->"d3847125-987d-4ae0-b46a-22b4f3b7d64c"],

Cell[BoxData[
 RowBox[{
  RowBox[{"-", 
   RowBox[{
    SuperscriptBox["cA", "\[Prime]",
     MultilineFunction->None], "[", "t", "]"}]}], "\[Equal]", 
  RowBox[{
   RowBox[{"kd", " ", 
    RowBox[{"cA", "[", "t", "]"}], " ", 
    RowBox[{"(", 
     RowBox[{"cEo", "-", 
      RowBox[{"cE", "[", "t", "]"}]}], ")"}]}], "+", 
   RowBox[{"ka", " ", 
    RowBox[{"cA", "[", "t", "]"}], " ", 
    RowBox[{"cE", "[", "t", "]"}]}]}]}]], "Output",
 CellChangeTimes->{3.8755889799694138`*^9},
 CellLabel->"Out[3]=",ExpressionUUID->"33e86af6-ad6b-4eb0-a47b-9d6266ae0357"],

Cell[BoxData[
 RowBox[{
  RowBox[{"-", 
   RowBox[{
    SuperscriptBox["cE", "\[Prime]",
     MultilineFunction->None], "[", "t", "]"}]}], "\[Equal]", 
  RowBox[{
   RowBox[{
    RowBox[{"-", "kd"}], " ", 
    RowBox[{"cA", "[", "t", "]"}], " ", 
    RowBox[{"(", 
     RowBox[{"cEo", "-", 
      RowBox[{"cE", "[", "t", "]"}]}], ")"}]}], "+", 
   RowBox[{"ka", " ", 
    RowBox[{"cA", "[", "t", "]"}], " ", 
    RowBox[{"cE", "[", "t", "]"}]}]}]}]], "Output",
 CellChangeTimes->{3.875588979985036*^9},
 CellLabel->"Out[4]=",ExpressionUUID->"06c9d548-f62e-45dd-897c-5fc2aa471317"],

Cell[BoxData[
 RowBox[{
  RowBox[{"-", 
   RowBox[{
    SuperscriptBox["cE", "\[Prime]",
     MultilineFunction->None], "[", "t", "]"}]}], "\[Equal]", 
  RowBox[{
   RowBox[{
    RowBox[{"-", "kd"}], " ", 
    RowBox[{"cA", "[", "t", "]"}], " ", 
    RowBox[{"(", 
     RowBox[{"cEo", "-", 
      RowBox[{"cE", "[", "t", "]"}]}], ")"}]}], "+", 
   RowBox[{"ka", " ", 
    RowBox[{"cA", "[", "t", "]"}], " ", 
    RowBox[{"cE", "[", "t", "]"}]}]}]}]], "Output",
 CellChangeTimes->{3.875588979985036*^9},
 CellLabel->"Out[5]=",ExpressionUUID->"c538a857-b5cc-4e5e-8896-f9058d265800"]
}, Open  ]],

Cell[CellGroupData[{

Cell[BoxData[
 RowBox[{"Solve", "[", 
  RowBox[{
   RowBox[{
    RowBox[{
     RowBox[{
      RowBox[{"-", "kd"}], " ", 
      RowBox[{"cA", "[", "t", "]"}], " ", 
      RowBox[{"(", 
       RowBox[{"cEo", "-", 
        RowBox[{"cE", "[", "t", "]"}]}], ")"}]}], "+", 
     RowBox[{"ka", " ", 
      RowBox[{"cA", "[", "t", "]"}], " ", 
      RowBox[{"cE", "[", "t", "]"}]}]}], "\[Equal]", "0"}], ",", 
   RowBox[{"cE", "[", "t", "]"}]}], "]"}]], "Input",
 CellLabel->"In[6]:=",ExpressionUUID->"d59bf8d1-34f8-4a18-bcb1-1d90c9470af5"],

Cell[BoxData[
 RowBox[{"{", 
  RowBox[{"{", 
   RowBox[{
    RowBox[{"cE", "[", "t", "]"}], "\[Rule]", 
    FractionBox[
     RowBox[{"cEo", " ", "kd"}], 
     RowBox[{"ka", "+", "kd"}]]}], "}"}], "}"}]], "Output",
 CellChangeTimes->{3.875588997105113*^9},
 CellLabel->"Out[6]=",ExpressionUUID->"9b5106f9-fe6d-4ae3-8bf1-b606da87cb3b"]
}, Open  ]],

Cell[CellGroupData[{

Cell[BoxData[
 RowBox[{"DSolve", "[", 
  RowBox[{
   RowBox[{"{", 
    RowBox[{
     RowBox[{
      RowBox[{
       RowBox[{"-", 
        RowBox[{
         SuperscriptBox["cA", "\[Prime]",
          MultilineFunction->None], "[", "t", "]"}]}], "\[Equal]", 
       RowBox[{
        RowBox[{"kd", " ", 
         RowBox[{"cA", "[", "t", "]"}], " ", 
         RowBox[{"(", 
          RowBox[{"cEo", "-", 
           RowBox[{"cE", "[", "t", "]"}]}], ")"}]}], "+", 
        RowBox[{"ka", " ", 
         RowBox[{"cA", "[", "t", "]"}], " ", 
         RowBox[{"cE", "[", "t", "]"}]}]}]}], "/.", 
      RowBox[{
       RowBox[{"cE", "[", "t", "]"}], "\[Rule]", 
       FractionBox[
        RowBox[{"cEo", " ", "kd"}], 
        RowBox[{"ka", "+", "kd"}]]}]}], ",", 
     RowBox[{
      RowBox[{"cA", "[", "0", "]"}], "\[Equal]", "cAo"}]}], "}"}], ",", 
   RowBox[{"cA", "[", "t", "]"}], ",", "t"}], "]"}]], "Input",
 CellLabel->"In[7]:=",ExpressionUUID->"3d9954ac-c4b1-4437-b27a-bd50260bc13a"],

Cell[BoxData[
 RowBox[{"{", 
  RowBox[{"{", 
   RowBox[{
    RowBox[{"cA", "[", "t", "]"}], "\[Rule]", 
    RowBox[{"cAo", " ", 
     SuperscriptBox["\[ExponentialE]", 
      RowBox[{"-", 
       FractionBox[
        RowBox[{"2", " ", "cEo", " ", "ka", " ", "kd", " ", "t"}], 
        RowBox[{"ka", "+", "kd"}]]}]]}]}], "}"}], "}"}]], "Output",
 CellChangeTimes->{3.8755890140432034`*^9},
 CellLabel->"Out[7]=",ExpressionUUID->"fd33eafe-6471-4ede-9529-71539d10321b"]
}, Open  ]],

Cell[CellGroupData[{

Cell[BoxData[
 RowBox[{"Simplify", "[", 
  RowBox[{"DSolve", "[", 
   RowBox[{
    RowBox[{"{", 
     RowBox[{
      RowBox[{
       RowBox[{
        RowBox[{
         RowBox[{
          RowBox[{"cP", "'"}], "[", "t", "]"}], "\[Equal]", 
         RowBox[{"ka", "*", 
          RowBox[{"cA", "[", "t", "]"}], "*", 
          RowBox[{"cE", "[", "t", "]"}]}]}], "/.", 
        RowBox[{
         RowBox[{"cE", "[", "t", "]"}], "\[Rule]", 
         FractionBox[
          RowBox[{"cEo", " ", "kd"}], 
          RowBox[{"ka", "+", "kd"}]]}]}], "/.", 
       RowBox[{
        RowBox[{"cA", "[", "t", "]"}], "\[Rule]", 
        RowBox[{"cAo", " ", 
         SuperscriptBox["\[ExponentialE]", 
          RowBox[{"-", 
           FractionBox[
            RowBox[{"2", " ", "cEo", " ", "ka", " ", "kd", " ", "t"}], 
            RowBox[{"ka", "+", "kd"}]]}]]}]}]}], ",", 
      RowBox[{
       RowBox[{"cP", "[", "0", "]"}], "\[Equal]", "0"}]}], "}"}], ",", 
    RowBox[{"cP", "[", "t", "]"}], ",", "t"}], "]"}], "]"}]], "Input",
 CellLabel->"In[8]:=",ExpressionUUID->"08e092cb-fe79-4de0-b4ae-1faec59893f9"],

Cell[BoxData[
 RowBox[{"{", 
  RowBox[{"{", 
   RowBox[{
    RowBox[{"cP", "[", "t", "]"}], "\[Rule]", 
    RowBox[{
     FractionBox["1", "2"], " ", "cAo", " ", 
     RowBox[{"(", 
      RowBox[{"1", "-", 
       SuperscriptBox["\[ExponentialE]", 
        RowBox[{"-", 
         FractionBox[
          RowBox[{"2", " ", "cEo", " ", "ka", " ", "kd", " ", "t"}], 
          RowBox[{"ka", "+", "kd"}]]}]]}], ")"}]}]}], "}"}], "}"}]], "Output",
 CellChangeTimes->{3.8755890421643553`*^9},
 CellLabel->"Out[8]=",ExpressionUUID->"c468621a-4f4c-448c-abf6-5731c0aa8248"]
}, Open  ]],

Cell[CellGroupData[{

Cell[BoxData[
 RowBox[{"Solve", "[", 
  RowBox[{
   RowBox[{
    RowBox[{"cEo", "\[Equal]", 
     RowBox[{
      RowBox[{"cE", "[", "t", "]"}], "+", 
      RowBox[{"cF", "[", "t", "]"}]}]}], "/.", 
    RowBox[{
     RowBox[{"cE", "[", "t", "]"}], "\[Rule]", 
     FractionBox[
      RowBox[{"cEo", " ", "kd"}], 
      RowBox[{"ka", "+", "kd"}]]}]}], ",", 
   RowBox[{"cF", "[", "t", " ", "]"}]}], "]"}]], "Input",
 CellLabel->"In[9]:=",ExpressionUUID->"9f671859-dfa7-45d5-9fbc-f8692c541b68"],

Cell[BoxData[
 RowBox[{"{", 
  RowBox[{"{", 
   RowBox[{
    RowBox[{"cF", "[", "t", "]"}], "\[Rule]", 
    FractionBox[
     RowBox[{"cEo", " ", "ka"}], 
     RowBox[{"ka", "+", "kd"}]]}], "}"}], "}"}]], "Output",
 CellChangeTimes->{3.875589069389722*^9},
 CellLabel->"Out[9]=",ExpressionUUID->"a6180a92-0a10-4ade-99ea-cd275431c67f"]
}, Open  ]],

Cell[CellGroupData[{

Cell[BoxData[
 RowBox[{"Simplify", "[", 
  RowBox[{"DSolve", "[", 
   RowBox[{
    RowBox[{"{", 
     RowBox[{
      RowBox[{
       RowBox[{
        RowBox[{
         RowBox[{
          RowBox[{"cQ", "'"}], "[", "t", "]"}], "\[Equal]", 
         RowBox[{"kd", "*", 
          RowBox[{"cA", "[", "t", "]"}], "*", 
          RowBox[{"cF", "[", "t", "]"}]}]}], "/.", 
        RowBox[{
         RowBox[{"cF", "[", "t", "]"}], "\[Rule]", 
         FractionBox[
          RowBox[{"cEo", " ", "ka"}], 
          RowBox[{"ka", "+", "kd"}]]}]}], "/.", 
       RowBox[{
        RowBox[{"cA", "[", "t", "]"}], "\[Rule]", 
        RowBox[{"cAo", " ", 
         SuperscriptBox["\[ExponentialE]", 
          RowBox[{"-", 
           FractionBox[
            RowBox[{"2", " ", "cEo", " ", "ka", " ", "kd", " ", "t"}], 
            RowBox[{"ka", "+", "kd"}]]}]]}]}]}], ",", 
      RowBox[{
       RowBox[{"cQ", "[", "0", "]"}], "\[Equal]", "0"}]}], "}"}], ",", 
    RowBox[{"cQ", "[", "t", "]"}], ",", "t"}], "]"}], "]"}]], "Input",
 CellLabel->"In[11]:=",ExpressionUUID->"762803ec-4930-4880-801c-e92b9d351174"],

Cell[BoxData[
 RowBox[{"{", 
  RowBox[{"{", 
   RowBox[{
    RowBox[{"cQ", "[", "t", "]"}], "\[Rule]", 
    RowBox[{
     FractionBox["1", "2"], " ", "cAo", " ", 
     RowBox[{"(", 
      RowBox[{"1", "-", 
       SuperscriptBox["\[ExponentialE]", 
        RowBox[{"-", 
         FractionBox[
          RowBox[{"2", " ", "cEo", " ", "ka", " ", "kd", " ", "t"}], 
          RowBox[{"ka", "+", "kd"}]]}]]}], ")"}]}]}], "}"}], "}"}]], "Output",
 CellChangeTimes->{3.875589093571725*^9},
 CellLabel->"Out[11]=",ExpressionUUID->"3b525afa-92c6-47cb-9ea6-2023cd5be344"]
}, Open  ]],

Cell[CellGroupData[{

Cell[BoxData[
 RowBox[{
  RowBox[{"Manipulate", "[", 
   RowBox[{
    RowBox[{"Module", "[", 
     RowBox[{
      RowBox[{"{", 
       RowBox[{
       "PingPongModel1", ",", "PingPongModel2", ",", "PingPongModel3", ",", 
        "soln", ",", "eqAns", ",", "eqAss", ",", "eqPns", ",", "eqPss", ",", 
        "eqQns", ",", "eqQss", ",", "eqPQns", ",", "eqPQss", ",", "eqEns", 
        ",", "eqEss", ",", "eqFns", ",", "eqFss", ",", "eqAnsD", ",", 
        "eqAssD", ",", "eqPnsD", ",", "eqPssD", ",", "eqQnsD", ",", "eqQssD", 
        ",", "plot1", ",", " ", "plot2", ",", " ", "plot3"}], "}"}], ",", 
      "\[IndentingNewLine]", 
      RowBox[{
       RowBox[{"PingPongModel1", "=", 
        RowBox[{"Sequence", "[", "\[IndentingNewLine]", 
         RowBox[{
          RowBox[{"PlotRange", "\[Rule]", "Full"}], ",", 
          "\[IndentingNewLine]", 
          RowBox[{"PlotLabel", "\[Rule]", 
           RowBox[{"Style", "[", 
            RowBox[{
            "\"\<Ping-Pong Reaction with One Substrate Undergoing \
Disproportionation\nin the Absence of Suicide Substrate Inactivation \
(\!\(\*SubscriptBox[StyleBox[\"k\",FontSlant->\"Italic\"], \"c\"]\) \
\[RightArrow] \[Infinity] and \
\!\(\*SubscriptBox[StyleBox[\"k\",FontSlant->\"Italic\"], \"f\"]\) \
\[RightArrow] \[Infinity]):\nA + E \[LongRightArrow] P + F\nA + F \
\[LongRightArrow] Q + E\n\>\"", ",", 
             RowBox[{"FontSize", "\[Rule]", "14"}]}], "]"}]}], ",", 
          "\[IndentingNewLine]", 
          RowBox[{"Frame", "\[Rule]", "True"}], ",", "\[IndentingNewLine]", 
          RowBox[{"FrameLabel", "\[Rule]", 
           RowBox[{"{", 
            RowBox[{
            "\"\<Time, s\>\"", ",", 
             "\"\<[ ], \!\(\*FormBox[RowBox[{\"mol\", \" \", \
SuperscriptBox[RowBox[{StyleBox[\"m\",FontSlant->\"Plain\"], \" \"}], \
RowBox[{\"\[Dash]\", \"3\"}]]}],TraditionalForm]\)\>\""}], "}"}]}], ",", 
          "\[IndentingNewLine]", 
          RowBox[{"LabelStyle", "\[Rule]", 
           RowBox[{"{", 
            RowBox[{"FontSize", "\[Rule]", "14"}], "}"}]}], ",", 
          "\[IndentingNewLine]", 
          RowBox[{"ImageSize", "\[Rule]", 
           RowBox[{"1.2", 
            RowBox[{"{", 
             RowBox[{"480", ",", "310"}], "}"}]}]}]}], "]"}]}], ";", 
       "\[IndentingNewLine]", 
       RowBox[{"PingPongModel2", "=", 
        RowBox[{"Sequence", "[", "\[IndentingNewLine]", 
         RowBox[{
          RowBox[{"PlotRange", "\[Rule]", 
           RowBox[{"{", 
            RowBox[{
             RowBox[{"{", 
              RowBox[{"0", ",", "50"}], "}"}], ",", 
             RowBox[{"{", 
              RowBox[{"0", ",", "0.069"}], "}"}]}], "}"}]}], ",", 
          "\[IndentingNewLine]", 
          RowBox[{"PlotLabel", "\[Rule]", 
           RowBox[{"Style", "[", 
            RowBox[{
            "\"\<Ping-Pong Reaction with One Substrate Undergoing \
Disproportionation\nin the Absence of Suicide Substrate Inactivation \
(\!\(\*SubscriptBox[StyleBox[\"k\",FontSlant->\"Italic\"], \"c\"]\) \
\[RightArrow] \[Infinity] and \
\!\(\*SubscriptBox[StyleBox[\"k\",FontSlant->\"Italic\"], \"f\"]\) \
\[RightArrow] \[Infinity]):\nA + E \[LongRightArrow] P + F\nA + F \
\[LongRightArrow] Q + E\>\"", ",", 
             RowBox[{"FontSize", "\[Rule]", "14"}]}], "]"}]}], ",", 
          "\[IndentingNewLine]", 
          RowBox[{"Frame", "\[Rule]", "True"}], ",", "\[IndentingNewLine]", 
          RowBox[{"FrameLabel", "\[Rule]", 
           RowBox[{"{", 
            RowBox[{
            "\"\<Time, s\>\"", ",", 
             "\"\<[ ], \!\(\*FormBox[RowBox[{\"mol\", \" \", \
SuperscriptBox[RowBox[{StyleBox[\"m\",FontSlant->\"Plain\"], \" \"}], \
RowBox[{\"\[Dash]\", \"3\"}]], \
SuperscriptBox[RowBox[{StyleBox[\"s\",FontSlant->\"Plain\"], \" \"}], \
RowBox[{\"\[Dash]\", \"1\"}]]}],TraditionalForm]\)\>\""}], "}"}]}], ",", 
          "\[IndentingNewLine]", 
          RowBox[{"LabelStyle", "\[Rule]", 
           RowBox[{"{", 
            RowBox[{"FontSize", "\[Rule]", "14"}], "}"}]}], ",", 
          "\[IndentingNewLine]", 
          RowBox[{"ImageSize", "\[Rule]", 
           RowBox[{"1.2", 
            RowBox[{"{", 
             RowBox[{"480", ",", "310"}], "}"}]}]}]}], "]"}]}], ";", 
       "\[IndentingNewLine]", 
       RowBox[{"PingPongModel3", "=", 
        RowBox[{"Sequence", "[", "\[IndentingNewLine]", 
         RowBox[{
          RowBox[{"PlotRange", "\[Rule]", 
           RowBox[{"{", 
            RowBox[{
             RowBox[{"{", 
              RowBox[{"0", ",", "50"}], "}"}], ",", 
             RowBox[{"{", 
              RowBox[{
               RowBox[{"-", "0.05"}], ",", "1.05"}], "}"}]}], "}"}]}], ",", 
          "\[IndentingNewLine]", 
          RowBox[{"PlotLabel", "\[Rule]", 
           RowBox[{"Style", "[", 
            RowBox[{
            "\"\<Ping-Pong Reaction with One Substrate Undergoing \
Disproportionation\nin the Absence of Suicide Substrate Inactivation \
(\!\(\*SubscriptBox[StyleBox[\"k\",FontSlant->\"Italic\"], \"c\"]\) \
\[RightArrow] \[Infinity] and \
\!\(\*SubscriptBox[StyleBox[\"k\",FontSlant->\"Italic\"], \"f\"]\) \
\[RightArrow] \[Infinity]):\nA + E \[LongRightArrow] P + F\nA + F \
\[LongRightArrow] Q + E\n\>\"", ",", 
             RowBox[{"FontSize", "\[Rule]", "14"}]}], "]"}]}], ",", 
          "\[IndentingNewLine]", 
          RowBox[{"Frame", "\[Rule]", "True"}], ",", "\[IndentingNewLine]", 
          RowBox[{"FrameLabel", "\[Rule]", 
           RowBox[{"{", 
            RowBox[{
            "\"\<Time, s\>\"", ",", 
             "\"\<[ ], \!\(\*FormBox[RowBox[{\"mol\", \" \", \
SuperscriptBox[RowBox[{StyleBox[\"m\",FontSlant->\"Plain\"], \" \"}], \
RowBox[{\"\[Dash]\", \"3\"}]]}],TraditionalForm]\)\>\""}], "}"}]}], ",", 
          "\[IndentingNewLine]", 
          RowBox[{"LabelStyle", "\[Rule]", 
           RowBox[{"{", 
            RowBox[{"FontSize", "\[Rule]", "14"}], "}"}]}], ",", 
          "\[IndentingNewLine]", 
          RowBox[{"ImageSize", "\[Rule]", 
           RowBox[{"1.2", 
            RowBox[{"{", 
             RowBox[{"480", ",", "310"}], "}"}]}]}]}], "]"}]}], ";", 
       "\[IndentingNewLine]", 
       RowBox[{"soln", "=", 
        RowBox[{"NDSolve", "[", 
         RowBox[{
          RowBox[{"{", 
           RowBox[{
            RowBox[{
             RowBox[{"-", 
              RowBox[{
               RowBox[{"cA", "'"}], "[", "t", "]"}]}], "\[Equal]", 
             RowBox[{
              RowBox[{"ka", "*", 
               RowBox[{"cA", "[", "t", "]"}], "*", 
               RowBox[{"cE", "[", "t", "]"}]}], "+", 
              RowBox[{"kd", "*", 
               RowBox[{"cA", "[", "t", "]"}], "*", 
               RowBox[{"cF", "[", "t", "]"}]}]}]}], ",", 
            RowBox[{
             RowBox[{"-", 
              RowBox[{
               RowBox[{"cE", "'"}], "[", "t", "]"}]}], "\[Equal]", 
             RowBox[{
              RowBox[{"ka", "*", 
               RowBox[{"cA", "[", "t", "]"}], "*", 
               RowBox[{"cE", "[", "t", "]"}]}], "-", 
              RowBox[{"kd", "*", 
               RowBox[{"cA", "[", "t", "]"}], "*", 
               RowBox[{"cF", "[", "t", "]"}]}]}]}], ",", 
            "\[IndentingNewLine]", 
            RowBox[{
             RowBox[{
              RowBox[{"cF", "'"}], "[", "t", "]"}], "\[Equal]", 
             RowBox[{
              RowBox[{"ka", "*", 
               RowBox[{"cA", "[", "t", "]"}], "*", 
               RowBox[{"cE", "[", "t", "]"}]}], "-", 
              RowBox[{"kd", "*", 
               RowBox[{"cA", "[", "t", "]"}], "*", 
               RowBox[{"cF", "[", "t", "]"}]}]}]}], ",", 
            RowBox[{
             RowBox[{
              RowBox[{"cP", "'"}], "[", "t", "]"}], "\[Equal]", 
             RowBox[{"ka", "*", 
              RowBox[{"cA", "[", "t", "]"}], "*", 
              RowBox[{"cE", "[", "t", "]"}]}]}], ",", 
            RowBox[{
             RowBox[{
              RowBox[{"cQ", "'"}], "[", "t", "]"}], "\[Equal]", 
             RowBox[{"kd", "*", 
              RowBox[{"cA", "[", "t", "]"}], "*", 
              RowBox[{"cF", "[", "t", "]"}]}]}], ",", 
            RowBox[{
             RowBox[{"cA", "[", "0", "]"}], "\[Equal]", "cAo"}], ",", 
            RowBox[{
             RowBox[{"cE", "[", "0", "]"}], "\[Equal]", "cEo"}], ",", 
            RowBox[{
             RowBox[{"cF", "[", "0", "]"}], "\[Equal]", "cFo"}], ",", 
            RowBox[{
             RowBox[{"cP", "[", "0", "]"}], "\[Equal]", "cPo"}], ",", 
            RowBox[{
             RowBox[{"cQ", "[", "0", "]"}], "\[Equal]", "cQo"}]}], "}"}], ",", 
          RowBox[{"{", 
           RowBox[{"cA", ",", "cE", ",", "cF", ",", "cP", ",", "cQ"}], "}"}], 
          ",", 
          RowBox[{"{", 
           RowBox[{"t", ",", "0.0", ",", "250"}], "}"}]}], "]"}]}], ";", 
       "\[IndentingNewLine]", 
       RowBox[{"eqAns", "=", 
        RowBox[{
         RowBox[{"cA", "[", "t", "]"}], "/.", "soln"}]}], ";", 
       "\[IndentingNewLine]", 
       RowBox[{"eqAss", "=", 
        RowBox[{"cAo", " ", 
         SuperscriptBox["\[ExponentialE]", 
          RowBox[{"-", 
           FractionBox[
            RowBox[{"2", " ", "cEo", " ", "ka", " ", "kd", " ", "t"}], 
            RowBox[{"ka", "+", "kd"}]]}]]}]}], ";", "\[IndentingNewLine]", 
       RowBox[{"eqPns", "=", 
        RowBox[{
         RowBox[{"cP", "[", "t", "]"}], "/.", "soln"}]}], ";", 
       "\[IndentingNewLine]", 
       RowBox[{"eqPss", "=", 
        RowBox[{
         FractionBox["1", "2"], " ", "cAo", " ", 
         RowBox[{"(", 
          RowBox[{"1", "-", 
           SuperscriptBox["\[ExponentialE]", 
            RowBox[{"-", 
             FractionBox[
              RowBox[{"2", " ", "cEo", " ", "ka", " ", "kd", " ", "t"}], 
              RowBox[{"ka", "+", "kd"}]]}]]}], ")"}]}]}], ";", 
       "\[IndentingNewLine]", 
       RowBox[{"eqQns", "=", 
        RowBox[{
         RowBox[{"cQ", "[", "t", "]"}], "/.", "soln"}]}], ";", 
       "\[IndentingNewLine]", 
       RowBox[{"eqQss", "=", 
        RowBox[{
         FractionBox["1", "2"], " ", "cAo", " ", 
         RowBox[{"(", 
          RowBox[{"1", "-", 
           SuperscriptBox["\[ExponentialE]", 
            RowBox[{"-", 
             FractionBox[
              RowBox[{"2", " ", "cEo", " ", "ka", " ", "kd", " ", "t"}], 
              RowBox[{"ka", "+", "kd"}]]}]]}], ")"}]}]}], ";", 
       "\[IndentingNewLine]", 
       RowBox[{"eqPQns", "=", 
        RowBox[{
         RowBox[{
          RowBox[{"cP", "[", "t", "]"}], "+", 
          RowBox[{"cQ", "[", "t", "]"}]}], "/.", "soln"}]}], ";", 
       "\[IndentingNewLine]", 
       RowBox[{"eqPQss", "=", 
        RowBox[{"cAo", " ", 
         RowBox[{"(", 
          RowBox[{"1", "-", 
           SuperscriptBox["\[ExponentialE]", 
            RowBox[{"-", 
             FractionBox[
              RowBox[{"2", " ", "cEo", " ", "ka", " ", "kd", " ", "t"}], 
              RowBox[{"ka", "+", "kd"}]]}]]}], ")"}]}]}], ";", 
       "\[IndentingNewLine]", 
       RowBox[{"eqEns", "=", 
        RowBox[{
         RowBox[{"cE", "[", "t", "]"}], "/.", "soln"}]}], ";", 
       "\[IndentingNewLine]", 
       RowBox[{"eqEss", "=", 
        FractionBox[
         RowBox[{"cEo", " ", "kd"}], 
         RowBox[{"ka", "+", "kd"}]]}], ";", "\[IndentingNewLine]", 
       RowBox[{"eqFns", "=", 
        RowBox[{
         RowBox[{"cF", "[", "t", "]"}], "/.", "soln"}]}], ";", 
       "\[IndentingNewLine]", 
       RowBox[{"eqFss", "=", 
        FractionBox[
         RowBox[{"cEo", " ", "ka"}], 
         RowBox[{"ka", "+", "kd"}]]}], ";", "\[IndentingNewLine]", 
       RowBox[{"eqAnsD", "=", 
        RowBox[{
         RowBox[{"-", 
          RowBox[{
           RowBox[{"cA", "'"}], "[", "t", "]"}]}], "/.", "soln"}]}], ";", 
       "\[IndentingNewLine]", 
       RowBox[{"eqAssD", "=", 
        RowBox[{"-", 
         RowBox[{"D", "[", 
          RowBox[{
           RowBox[{"cAo", " ", 
            SuperscriptBox["\[ExponentialE]", 
             RowBox[{"-", 
              FractionBox[
               RowBox[{"2", " ", "cEo", " ", "ka", " ", "kd", " ", "t"}], 
               RowBox[{"ka", "+", "kd"}]]}]]}], ",", "t"}], "]"}]}]}], ";", 
       "\[IndentingNewLine]", 
       RowBox[{"eqPnsD", "=", 
        RowBox[{
         RowBox[{
          RowBox[{"cP", "'"}], "[", "t", "]"}], "/.", "soln"}]}], ";", 
       "\[IndentingNewLine]", 
       RowBox[{"eqPssD", "=", 
        RowBox[{"D", "[", 
         RowBox[{
          RowBox[{
           FractionBox["1", "2"], " ", "cAo", " ", 
           RowBox[{"(", 
            RowBox[{"1", "-", 
             SuperscriptBox["\[ExponentialE]", 
              RowBox[{"-", 
               FractionBox[
                RowBox[{"2", " ", "cEo", " ", "ka", " ", "kd", " ", "t"}], 
                RowBox[{"ka", "+", "kd"}]]}]]}], ")"}]}], ",", "t"}], "]"}]}],
        ";", "\[IndentingNewLine]", 
       RowBox[{"eqQnsD", "=", 
        RowBox[{
         RowBox[{
          RowBox[{"cQ", "'"}], "[", "t", "]"}], "/.", "soln"}]}], ";", 
       "\[IndentingNewLine]", 
       RowBox[{"eqQssD", "=", 
        RowBox[{"D", "[", 
         RowBox[{
          RowBox[{
           FractionBox["1", "2"], " ", "cAo", " ", 
           RowBox[{"(", 
            RowBox[{"1", "-", 
             SuperscriptBox["\[ExponentialE]", 
              RowBox[{"-", 
               FractionBox[
                RowBox[{"2", " ", "cEo", " ", "ka", " ", "kd", " ", "t"}], 
                RowBox[{"ka", "+", "kd"}]]}]]}], ")"}]}], ",", "t"}], "]"}]}],
        ";", "\[IndentingNewLine]", 
       RowBox[{"plot1", "=", 
        RowBox[{"Plot", "[", 
         RowBox[{
          RowBox[{"{", 
           RowBox[{
           "eqAns", ",", "eqAss", ",", "eqPns", ",", "eqPss", ",", "eqQns", 
            ",", 
            RowBox[{"eqQss", ";", "eqPQns"}], ",", "eqPQss"}], "}"}], ",", 
          RowBox[{"{", 
           RowBox[{"t", ",", "0.0", ",", "250"}], "}"}], ",", 
          "\[IndentingNewLine]", 
          RowBox[{"Evaluate", "@", "PingPongModel1"}], ",", 
          "\[IndentingNewLine]", 
          RowBox[{"PlotStyle", "\[Rule]", 
           RowBox[{"{", 
            RowBox[{
             RowBox[{"{", 
              RowBox[{"Thick", ",", "Pink"}], "}"}], ",", 
             RowBox[{"{", 
              RowBox[{"Thick", ",", 
               RowBox[{"Darker", "[", "Blue", "]"}], ",", "Dashed"}], "}"}], 
             ",", 
             RowBox[{"{", 
              RowBox[{"Thick", ",", "Brown"}], "}"}], ",", 
             RowBox[{"{", 
              RowBox[{"Thick", ",", "Dashed", ",", "Red"}], "}"}], ",", 
             RowBox[{"{", 
              RowBox[{"Thick", ",", 
               RowBox[{"Darker", "[", "Green", "]"}]}], "}"}], ",", 
             RowBox[{"{", 
              RowBox[{"Thick", ",", "Blue"}], "}"}], ",", 
             RowBox[{"{", 
              RowBox[{"Thick", ",", "Green", ",", "Dashed"}], "}"}]}], 
            "}"}]}], ",", "\[IndentingNewLine]", 
          RowBox[{"Epilog", "\[Rule]", 
           RowBox[{"{", 
            RowBox[{
             RowBox[{"Inset", "[", 
              RowBox[{
               RowBox[{"Style", "[", 
                RowBox[{
                "\"\<[A\!\(\*SubscriptBox[\(]\), \(ns\)]\)\>\"", ",", "12", 
                 ",", 
                 RowBox[{"Background", "\[Rule]", "White"}]}], "]"}], ",", 
               RowBox[{"{", 
                RowBox[{"50", ",", 
                 RowBox[{
                  RowBox[{"0.5", "+", 
                   RowBox[{"cA", "[", "50", "]"}]}], "/.", 
                  RowBox[{"soln", "[", 
                   RowBox[{"[", "1", "]"}], "]"}]}]}], "}"}]}], "]"}], ",", 
             "\[IndentingNewLine]", 
             RowBox[{"Inset", "[", 
              RowBox[{
               RowBox[{"Style", "[", 
                RowBox[{
                "\"\<[A\!\(\*SubscriptBox[\(]\), \(ss\)]\)\>\"", ",", "12", 
                 ",", 
                 RowBox[{"Background", "\[Rule]", "White"}]}], "]"}], ",", 
               RowBox[{"{", 
                RowBox[{"25", ",", 
                 RowBox[{
                  RowBox[{
                   RowBox[{"-", "0.5"}], "+", "eqAss"}], "/.", 
                  RowBox[{"t", "\[Rule]", "25"}]}]}], "}"}]}], "]"}], ",", 
             "\[IndentingNewLine]", 
             RowBox[{"Inset", "[", 
              RowBox[{
               RowBox[{"Style", "[", 
                RowBox[{
                "\"\<[P\!\(\*SubscriptBox[\(]\), \(ns\)]\)\>\"", ",", "12", 
                 ",", 
                 RowBox[{"Background", "\[Rule]", "White"}]}], "]"}], ",", 
               RowBox[{"{", 
                RowBox[{"75", ",", 
                 RowBox[{
                  RowBox[{"0.4", "+", 
                   RowBox[{"cP", "[", "75", "]"}]}], "/.", 
                  RowBox[{"soln", "[", 
                   RowBox[{"[", "1", "]"}], "]"}]}]}], "}"}]}], "]"}], ",", 
             "\[IndentingNewLine]", 
             RowBox[{"Inset", "[", 
              RowBox[{
               RowBox[{"Style", "[", 
                RowBox[{
                "\"\<[P\!\(\*SubscriptBox[\(]\), \(ss\)]\) or \
[Q\!\(\*SubscriptBox[\(]\), \(ss\)]\)\>\"", ",", "12", ",", 
                 RowBox[{"Background", "\[Rule]", "White"}]}], "]"}], ",", 
               RowBox[{"{", 
                RowBox[{"200", ",", 
                 RowBox[{
                  RowBox[{"0.5", "+", "eqPss"}], "/.", 
                  RowBox[{"t", "\[Rule]", "200"}]}]}], "}"}]}], "]"}], ",", 
             RowBox[{"Inset", "[", 
              RowBox[{
               RowBox[{"Style", "[", 
                RowBox[{
                "\"\<[Q\!\(\*SubscriptBox[\(]\), \(ns\)]\)\>\"", ",", "12", 
                 ",", 
                 RowBox[{"Background", "\[Rule]", "White"}]}], "]"}], ",", 
               RowBox[{"{", 
                RowBox[{"110", ",", 
                 RowBox[{
                  RowBox[{
                   RowBox[{"-", "0.5"}], "+", 
                   RowBox[{"cQ", "[", "110", "]"}]}], "/.", 
                  RowBox[{"soln", "[", 
                   RowBox[{"[", "1", "]"}], "]"}]}]}], "}"}]}], "]"}], ",", 
             RowBox[{"Inset", "[", 
              RowBox[{
               RowBox[{"Style", "[", 
                RowBox[{
                "\"\<([P]+[Q]\!\(\*SubscriptBox[\()\), \(ns\)]\)\>\"", ",", 
                 "12", ",", 
                 RowBox[{"Background", "\[Rule]", "White"}]}], "]"}], ",", 
               RowBox[{"{", 
                RowBox[{"225", ",", 
                 RowBox[{
                  RowBox[{
                   RowBox[{"-", "0.5"}], "+", 
                   RowBox[{"cP", "[", "225", "]"}], "+", 
                   RowBox[{"cQ", "[", "225", "]"}]}], "/.", 
                  RowBox[{"soln", "[", 
                   RowBox[{"[", "1", "]"}], "]"}]}]}], "}"}]}], "]"}], ",", 
             "\[IndentingNewLine]", 
             RowBox[{"Inset", "[", 
              RowBox[{
               RowBox[{"Style", "[", 
                RowBox[{
                "\"\<([P]+[Q]\!\(\*SubscriptBox[\()\), \(ss\)]\)\>\"", ",", 
                 "12", ",", 
                 RowBox[{"Background", "\[Rule]", "White"}]}], "]"}], ",", 
               RowBox[{"{", 
                RowBox[{"125", ",", 
                 RowBox[{
                  RowBox[{"0.5", "+", "eqPQss"}], "/.", 
                  RowBox[{"t", "\[Rule]", "125"}]}]}], "}"}]}], "]"}]}], 
            "\[IndentingNewLine]", "}"}]}]}], "]"}]}], ";", 
       "\[IndentingNewLine]", 
       RowBox[{"plot2", "=", 
        RowBox[{"Plot", "[", 
         RowBox[{
          RowBox[{"{", 
           RowBox[{
           "eqAnsD", ",", "eqAssD", ",", "eqPnsD", ",", "eqPssD", ",", 
            "eqQnsD", ",", 
            RowBox[{"eqQssD", ";"}]}], "}"}], ",", 
          RowBox[{"{", 
           RowBox[{"t", ",", "0", ",", "250"}], "}"}], ",", 
          "\[IndentingNewLine]", 
          RowBox[{"Evaluate", "@", "PingPongModel2"}], ",", 
          "\[IndentingNewLine]", 
          RowBox[{"PlotStyle", "\[Rule]", 
           RowBox[{"{", 
            RowBox[{
             RowBox[{"{", 
              RowBox[{"Thick", ",", "Pink"}], "}"}], ",", 
             RowBox[{"{", 
              RowBox[{"Thick", ",", 
               RowBox[{"Darker", "[", "Cyan", "]"}], ",", " ", "Dashed"}], 
              "}"}], ",", 
             RowBox[{"{", 
              RowBox[{"Thick", ",", "Brown"}], "}"}], ",", 
             RowBox[{"{", 
              RowBox[{"Thick", ",", "Dashed", ",", "Red"}], "}"}], ",", 
             RowBox[{"{", 
              RowBox[{"Thick", ",", 
               RowBox[{"Darker", "[", "Green", "]"}]}], "}"}]}], "}"}]}], ",",
           "\[IndentingNewLine]", 
          RowBox[{"Epilog", "\[Rule]", 
           RowBox[{"{", 
            RowBox[{
             RowBox[{"Inset", "[", 
              RowBox[{
               RowBox[{"Style", "[", 
                RowBox[{
                "\"\<[A]\!\(\*SubscriptBox[\('\), \(ns\)]\)\>\"", ",", "12", 
                 ",", 
                 RowBox[{"Background", "\[Rule]", "White"}]}], "]"}], ",", 
               RowBox[{"{", 
                RowBox[{"5", ",", 
                 RowBox[{
                  RowBox[{
                   RowBox[{"-", "0.005"}], "-", 
                   RowBox[{
                    RowBox[{"cA", "'"}], "[", "5", "]"}]}], "/.", 
                  RowBox[{"soln", "[", 
                   RowBox[{"[", "1", "]"}], "]"}]}]}], "}"}]}], "]"}], ",", 
             "\[IndentingNewLine]", 
             RowBox[{"Inset", "[", 
              RowBox[{
               RowBox[{"Style", "[", 
                RowBox[{
                "\"\<[A]\!\(\*SubscriptBox[\('\), \(ss\)]\)\>\"", ",", "12", 
                 ",", 
                 RowBox[{"Background", "\[Rule]", "White"}]}], "]"}], ",", 
               RowBox[{"{", 
                RowBox[{"5", ",", 
                 RowBox[{
                  RowBox[{"0.005", "+", "eqAssD"}], "/.", 
                  RowBox[{"t", "\[Rule]", "5"}]}]}], "}"}]}], "]"}], ",", 
             "\[IndentingNewLine]", 
             RowBox[{"Inset", "[", 
              RowBox[{
               RowBox[{"Style", "[", 
                RowBox[{
                "\"\<[P]\!\(\*SubscriptBox[\('\), \(ns\)]\)\>\"", ",", "12", 
                 ",", 
                 RowBox[{"Background", "\[Rule]", "White"}]}], "]"}], ",", 
               RowBox[{"{", 
                RowBox[{"7", ",", 
                 RowBox[{
                  RowBox[{"0.005", "+", 
                   RowBox[{
                    RowBox[{"cP", "'"}], "[", "7", "]"}]}], "/.", 
                  RowBox[{"soln", "[", 
                   RowBox[{"[", "1", "]"}], "]"}]}]}], "}"}]}], "]"}], ",", 
             "\[IndentingNewLine]", 
             RowBox[{"Inset", "[", 
              RowBox[{
               RowBox[{"Style", "[", 
                RowBox[{
                "\"\<[P]\!\(\*SubscriptBox[\('\), \(ss\)]\) or \
[Q]\!\(\*SubscriptBox[\('\), \(ss\)]\)\>\"", ",", "12", ",", 
                 RowBox[{"Background", "\[Rule]", "White"}]}], "]"}], ",", 
               RowBox[{"{", 
                RowBox[{"40", ",", 
                 RowBox[{
                  RowBox[{
                   RowBox[{"-", "0.01"}], "+", "eqPssD"}], "/.", 
                  RowBox[{"t", "\[Rule]", "40"}]}]}], "}"}]}], "]"}], ",", 
             RowBox[{"Inset", "[", 
              RowBox[{
               RowBox[{"Style", "[", 
                RowBox[{
                "\"\<[Q]\!\(\*SubscriptBox[\('\), \(ns\)]\)\>\"", ",", "12", 
                 ",", 
                 RowBox[{"Background", "\[Rule]", "White"}]}], "]"}], ",", 
               RowBox[{"{", 
                RowBox[{"5", ",", 
                 RowBox[{
                  RowBox[{
                   RowBox[{"-", "0.01"}], "+", 
                   RowBox[{
                    RowBox[{"cQ", "'"}], "[", "5", "]"}]}], "/.", 
                  RowBox[{"soln", "[", 
                   RowBox[{"[", "1", "]"}], "]"}]}]}], "}"}]}], "]"}]}], 
            "}"}]}]}], "]"}]}], ";", "\[IndentingNewLine]", 
       RowBox[{"plot3", "=", 
        RowBox[{"Plot", "[", 
         RowBox[{
          RowBox[{"{", 
           RowBox[{"eqEns", ",", "eqEss", ",", "eqFns", ",", "eqFss"}], "}"}],
           ",", 
          RowBox[{"{", 
           RowBox[{"t", ",", "0.02", ",", "250"}], "}"}], ",", 
          "\[IndentingNewLine]", 
          RowBox[{"Evaluate", "@", "PingPongModel3"}], ",", 
          "\[IndentingNewLine]", 
          RowBox[{"PlotStyle", "\[Rule]", 
           RowBox[{"{", 
            RowBox[{
             RowBox[{"{", 
              RowBox[{"Thick", ",", "Pink"}], "}"}], ",", 
             RowBox[{"{", 
              RowBox[{"Thick", ",", 
               RowBox[{"Darker", "[", "Blue", "]"}], ",", "Dashed"}], "}"}], 
             ",", 
             RowBox[{"{", 
              RowBox[{"Thick", ",", 
               RowBox[{"Darker", "[", "Green", "]"}]}], "}"}], ",", 
             RowBox[{"{", 
              RowBox[{"Thick", ",", "Dashed", ",", 
               RowBox[{"Darker", "[", "Cyan", "]"}]}], "}"}]}], "}"}]}], ",", 
          "\[IndentingNewLine]", 
          RowBox[{"Epilog", "\[Rule]", 
           RowBox[{"{", 
            RowBox[{
             RowBox[{"Inset", "[", 
              RowBox[{
               RowBox[{"Style", "[", 
                RowBox[{
                "\"\<[E\!\(\*SubscriptBox[\(]\), \(ns\)]\)\>\"", ",", "12", 
                 ",", 
                 RowBox[{"Background", "\[Rule]", "White"}]}], "]"}], ",", 
               RowBox[{"{", 
                RowBox[{"5", ",", 
                 RowBox[{
                  RowBox[{"0.05", "+", 
                   RowBox[{"cE", "[", "5", "]"}]}], "/.", 
                  RowBox[{"soln", "[", 
                   RowBox[{"[", "1", "]"}], "]"}]}]}], "}"}]}], "]"}], ",", 
             "\[IndentingNewLine]", 
             RowBox[{"Inset", "[", 
              RowBox[{
               RowBox[{"Style", "[", 
                RowBox[{
                "\"\<[E\!\(\*SubscriptBox[\(]\), \(ss\)]\)\>\"", ",", "12", 
                 ",", 
                 RowBox[{"Background", "\[Rule]", "White"}]}], "]"}], ",", 
               RowBox[{"{", 
                RowBox[{"3", ",", 
                 RowBox[{
                  RowBox[{
                   RowBox[{"-", "0.05"}], "+", "eqEss"}], "/.", 
                  RowBox[{"t", "\[Rule]", "3"}]}]}], "}"}]}], "]"}], ",", 
             "\[IndentingNewLine]", 
             RowBox[{"Inset", "[", 
              RowBox[{
               RowBox[{"Style", "[", 
                RowBox[{
                "\"\<[F\!\(\*SubscriptBox[\(]\), \(ns\)]\)\>\"", ",", "12", 
                 ",", 
                 RowBox[{"Background", "\[Rule]", "White"}]}], "]"}], ",", 
               RowBox[{"{", 
                RowBox[{"5", ",", 
                 RowBox[{
                  RowBox[{
                   RowBox[{"-", "0.05"}], "+", 
                   RowBox[{"cF", "[", "5", "]"}]}], "/.", 
                  RowBox[{"soln", "[", 
                   RowBox[{"[", "1", "]"}], "]"}]}]}], "}"}]}], "]"}], ",", 
             "\[IndentingNewLine]", 
             RowBox[{"Inset", "[", 
              RowBox[{
               RowBox[{"Style", "[", 
                RowBox[{
                "\"\<[F\!\(\*SubscriptBox[\(]\), \(ss\)]\)\>\"", ",", "12", 
                 ",", 
                 RowBox[{"Background", "\[Rule]", "White"}]}], "]"}], ",", 
               RowBox[{"{", 
                RowBox[{"3", ",", 
                 RowBox[{
                  RowBox[{"0.05", "+", "eqFss"}], "/.", 
                  RowBox[{"t", "\[Rule]", "3"}]}]}], "}"}]}], "]"}]}], 
            "}"}]}]}], "]"}]}], ";", "\[IndentingNewLine]", 
       RowBox[{"Pane", "[", "\[IndentingNewLine]", 
        RowBox[{
         RowBox[{"Switch", "[", 
          RowBox[{"PingPong", ",", "\[IndentingNewLine]", "1", ",", 
           RowBox[{"Show", "[", "plot1", "]"}], ",", "\[IndentingNewLine]", 
           "2", ",", 
           RowBox[{"Show", "[", "plot2", "]"}], ",", "\[IndentingNewLine]", 
           "3", ",", 
           RowBox[{"Show", "[", "plot3", "]"}]}], "\[IndentingNewLine]", 
          "]"}], ",", 
         RowBox[{"ImageSize", "\[Rule]", 
          RowBox[{"1.2", 
           RowBox[{"{", 
            RowBox[{"480", ",", "310"}], "}"}]}]}]}], "]"}]}]}], "]"}], ",", 
    "\[IndentingNewLine]", 
    RowBox[{"Row", "[", 
     RowBox[{"{", "\[IndentingNewLine]", 
      RowBox[{
       RowBox[{"Column", "[", 
        RowBox[{"{", "\[IndentingNewLine]", "\[IndentingNewLine]", 
         RowBox[{
          RowBox[{"Style", "[", 
           RowBox[{"\"\<REACTANTS CONCENTRATIONS:\>\"", ",", "Bold"}], "]"}], 
          ",", "\[IndentingNewLine]", 
          RowBox[{"Control", "@", 
           RowBox[{"{", 
            RowBox[{
             RowBox[{"{", 
              RowBox[{
              "cAo", ",", "5", ",", 
               "\"\<[A\!\(\*SubscriptBox[\(]\), \
\(0\)]\),\!\(\*FormBox[RowBox[{\" \", RowBox[{\"mol\", \" \", \
SuperscriptBox[RowBox[{StyleBox[\"m\",FontSlant->\"Plain\"], \" \"}], \
RowBox[{\"\[Dash]\", \"3\"}]]}]}],TraditionalForm]\)\>\""}], "}"}], ",", 
             "0.1", ",", "10", ",", 
             RowBox[{"Appearance", "\[Rule]", "\"\<Labeled\>\""}]}], "}"}]}], 
          ",", "\[IndentingNewLine]", 
          RowBox[{"Control", "@", 
           RowBox[{"{", 
            RowBox[{
             RowBox[{"{", 
              RowBox[{
              "cEo", ",", "1", ",", 
               "\"\<[E\!\(\*SubscriptBox[\(]\), \
\(0\)]\),\!\(\*FormBox[RowBox[{\" \", RowBox[{\"mol\", \" \", \
SuperscriptBox[RowBox[{StyleBox[\"m\",FontSlant->\"Plain\"], \" \"}], \
RowBox[{\"\[Dash]\", \"3\"}]]}]}],TraditionalForm]\)\>\""}], "}"}], ",", 
             "0.1", ",", "2", ",", 
             RowBox[{"Appearance", "\[Rule]", "\"\<Labeled\>\""}]}], "}"}]}], 
          ",", "\[IndentingNewLine]", 
          RowBox[{"Control", "@", 
           RowBox[{"{", 
            RowBox[{
             RowBox[{"{", 
              RowBox[{
              "cFo", ",", "0", ",", 
               "\"\<[F\!\(\*SubscriptBox[\(]\), \
\(0\)]\),\!\(\*FormBox[RowBox[{\" \", RowBox[{\"mol\", \" \", \
SuperscriptBox[RowBox[{StyleBox[\"m\",FontSlant->\"Plain\"], \" \"}], \
RowBox[{\"\[Dash]\", \"3\"}]]}]}],TraditionalForm]\)\>\""}], "}"}], ",", "0", 
             ",", "0", ",", 
             RowBox[{"Appearance", "\[Rule]", "\"\<Labeled\>\""}]}], "}"}]}], 
          ",", "\[IndentingNewLine]", 
          RowBox[{"Control", "@", 
           RowBox[{"{", 
            RowBox[{
             RowBox[{"{", 
              RowBox[{
              "cPo", ",", "0", ",", 
               "\"\<[P\!\(\*SubscriptBox[\(]\), \
\(0\)]\),\!\(\*FormBox[RowBox[{\" \", RowBox[{\"mol\", \" \", \
SuperscriptBox[RowBox[{StyleBox[\"m\",FontSlant->\"Plain\"], \" \"}], \
RowBox[{\"\[Dash]\", \"3\"}]]}]}],TraditionalForm]\)\>\""}], "}"}], ",", "0", 
             ",", "0", ",", 
             RowBox[{"Appearance", "\[Rule]", "\"\<Labeled\>\""}]}], "}"}]}], 
          ",", "\[IndentingNewLine]", 
          RowBox[{"Control", "@", 
           RowBox[{"{", 
            RowBox[{
             RowBox[{"{", 
              RowBox[{
              "cQo", ",", "0", ",", 
               "\"\<[Q\!\(\*SubscriptBox[\(]\), \
\(0\)]\),\!\(\*FormBox[RowBox[{\" \", RowBox[{\"mol\", \" \", \
SuperscriptBox[RowBox[{StyleBox[\"m\",FontSlant->\"Plain\"], \" \"}], \
RowBox[{\"\[Dash]\", \"3\"}]]}]}],TraditionalForm]\)\>\""}], "}"}], ",", "0", 
             ",", "0", ",", 
             RowBox[{"Appearance", "\[Rule]", "\"\<Labeled\>\""}]}], "}"}]}], 
          ",", "\[IndentingNewLine]", 
          RowBox[{"Control", "@", 
           RowBox[{"{", 
            RowBox[{
             RowBox[{"{", 
              RowBox[{
              "cIo", ",", "0", ",", 
               "\"\<[I\!\(\*SubscriptBox[\(]\), \
\(0\)]\),\!\(\*FormBox[RowBox[{\" \", RowBox[{\"mol\", \" \", \
SuperscriptBox[RowBox[{StyleBox[\"m\",FontSlant->\"Plain\"], \" \"}], \
RowBox[{\"\[Dash]\", \"3\"}]]}]}],TraditionalForm]\)\>\""}], "}"}], ",", "0", 
             ",", "0", ",", 
             RowBox[{"Appearance", "\[Rule]", "\"\<Labeled\>\""}]}], 
            "}"}]}]}], "\[IndentingNewLine]", "}"}], "]"}], ",", 
       "\[IndentingNewLine]", 
       RowBox[{"Column", "[", 
        RowBox[{"{", "\[IndentingNewLine]", "\[IndentingNewLine]", 
         RowBox[{
          RowBox[{"Style", "[", 
           RowBox[{"\"\<RATE CONSTANTS:\>\"", ",", "Bold"}], "]"}], ",", 
          "\[IndentingNewLine]", 
          RowBox[{"Control", "@", 
           RowBox[{"{", 
            RowBox[{
             RowBox[{"{", 
              RowBox[{
              "ka", ",", "0.005", ",", 
               "\"\<\!\(\*SubscriptBox[StyleBox[\"k\",FontSlant->\"Italic\"], \
\"a\"]\), \
\!\(\*FormBox[RowBox[{SuperscriptBox[StyleBox[\"s\",FontSlant->\"Plain\"], \
RowBox[{\"\[Dash]\", \"1\"}]], \" \", SuperscriptBox[\"mol\", RowBox[{\"\
\[Dash]\", \"1\"}]], \" \", \
SuperscriptBox[StyleBox[\"m\",FontSlant->\"Plain\"], \
\"3\"]}],TraditionalForm]\)\>\""}], "}"}], ",", "0.001", ",", "0.01", ",", 
             RowBox[{"Appearance", "\[Rule]", "\"\<Labeled\>\""}]}], "}"}]}], 
          ",", "\[IndentingNewLine]", 
          RowBox[{"Control", "@", 
           RowBox[{"{", 
            RowBox[{
             RowBox[{"{", 
              RowBox[{
              "kd", ",", "0.05", ",", 
               "\"\<\!\(\*SubscriptBox[StyleBox[\"k\",FontSlant->\"Italic\"], \
\"d\"]\), \
\!\(\*FormBox[RowBox[{SuperscriptBox[StyleBox[\"s\",FontSlant->\"Plain\"], \
RowBox[{\"\[Dash]\", \"1\"}]], \" \", SuperscriptBox[\"mol\", RowBox[{\"\
\[Dash]\", \"1\"}]], \" \", \
SuperscriptBox[StyleBox[\"m\",FontSlant->\"Plain\"], \
\"3\"]}],TraditionalForm]\)\>\""}], "}"}], ",", "0.001", ",", "0.1", ",", 
             RowBox[{"Appearance", "\[Rule]", "\"\<Labeled\>\""}]}], 
            "}"}]}]}], "\[IndentingNewLine]", "}"}], "]"}], ",", 
       "\[IndentingNewLine]", 
       RowBox[{"Control", "@", 
        RowBox[{"{", 
         RowBox[{
          RowBox[{"{", 
           RowBox[{"PingPong", ",", "1", ",", "\"\<Panels\>\""}], "}"}], ",", 
          RowBox[{"{", "\[IndentingNewLine]", 
           RowBox[{
            RowBox[{"1", "\[Rule]", "\"\<A\>\""}], ",", "\[IndentingNewLine]", 
            RowBox[{"2", "\[Rule]", "\"\<B\>\""}], ",", "\[IndentingNewLine]", 
            RowBox[{"3", "\[Rule]", "\"\<C\>\""}]}], "\[IndentingNewLine]", 
           "}"}], ",", 
          RowBox[{"ControlType", "\[Rule]", "Setter"}]}], "}"}]}]}], "}"}], 
     "]"}]}], "\[IndentingNewLine]", "]"}], "\[IndentingNewLine]"}]], "Input",
 CellChangeTimes->{{3.841749732856798*^9, 3.841749906918338*^9}, {
   3.841750053788534*^9, 3.8417500568715334`*^9}, {3.8418036925935926`*^9, 
   3.841803706752474*^9}, {3.8418037607203846`*^9, 3.841803774188929*^9}, {
   3.8418038073567395`*^9, 3.8418038499275484`*^9}, 3.841803904405038*^9, {
   3.8418053228201857`*^9, 3.841805323938447*^9}, {3.841805430221315*^9, 
   3.841805430784861*^9}, {3.8418056712220964`*^9, 3.8418056725014286`*^9}, {
   3.841836424378595*^9, 3.8418364269817724`*^9}, {3.8418867914336452`*^9, 
   3.841886853106645*^9}, {3.841886891238326*^9, 3.8418869414298725`*^9}, {
   3.8418871779836135`*^9, 3.8418871986816463`*^9}, {3.8418872411875305`*^9, 
   3.841887251013095*^9}, {3.84188731368587*^9, 3.8418873297914915`*^9}, {
   3.8418874752412233`*^9, 3.8418874765690117`*^9}, 3.8418875913857713`*^9, {
   3.841887944680502*^9, 3.841888206986114*^9}, {3.8418882799062786`*^9, 
   3.8418882862487326`*^9}, {3.8418883519361906`*^9, 3.841888407829341*^9}, {
   3.8418884538187127`*^9, 3.8418884964492006`*^9}, {3.8420104553380365`*^9, 
   3.842010456105392*^9}, {3.842010501475397*^9, 3.8420105017222424`*^9}, 
   3.8420105393949304`*^9, {3.8466571293324575`*^9, 3.8466571443435946`*^9}, {
   3.846657370778998*^9, 3.8466574869332204`*^9}, {3.846657601401836*^9, 
   3.846657689884245*^9}, 3.846658199217289*^9, {3.8466582422685738`*^9, 
   3.8466583553051624`*^9}, {3.8466583890306325`*^9, 3.846658445869364*^9}, {
   3.8466587017050686`*^9, 3.846658727875573*^9}, {3.8466589044445233`*^9, 
   3.846658923562812*^9}, {3.8466590107398157`*^9, 3.846659080311597*^9}, {
   3.846659127976855*^9, 3.846659128101828*^9}, {3.8466591912168427`*^9, 
   3.8466592481487646`*^9}, {3.8466594766550484`*^9, 3.846659533599231*^9}, {
   3.84665958437168*^9, 3.846659863675767*^9}, {3.8466598938799286`*^9, 
   3.846660059514933*^9}, {3.846669158921476*^9, 3.846669160540101*^9}, {
   3.846669210254387*^9, 3.8466695226397595`*^9}, {3.8466696739300594`*^9, 
   3.846669700555784*^9}, {3.846669733667065*^9, 3.846669830943153*^9}, {
   3.846669942941931*^9, 3.846669970183852*^9}, {3.8466700023530407`*^9, 
   3.846670003337158*^9}, {3.846670285534099*^9, 3.8466702962801914`*^9}, 
   3.846670457513308*^9, {3.846670500562671*^9, 3.8466705275347214`*^9}, {
   3.8466707719949465`*^9, 3.8466708730671043`*^9}, {3.8466709531558485`*^9, 
   3.8466710349452095`*^9}, {3.8466710720817604`*^9, 3.84667111103518*^9}, {
   3.8466711412342763`*^9, 3.8466712050839252`*^9}, {3.846671240711611*^9, 
   3.846671300266326*^9}, {3.846671342372938*^9, 3.8466714524283266`*^9}, {
   3.8466715047371726`*^9, 3.846671713659568*^9}, {3.8466722931171083`*^9, 
   3.8466723395722675`*^9}, 3.846672384048112*^9, {3.846739969188094*^9, 
   3.846739972171768*^9}, 3.846745658041407*^9, 3.846746398433676*^9, {
   3.846764496223112*^9, 3.846764552952351*^9}, {3.8472766347056165`*^9, 
   3.847276669849394*^9}, {3.847276713138187*^9, 3.847276721757236*^9}, {
   3.8472770823160067`*^9, 3.8472771436873293`*^9}, {3.847277313528089*^9, 
   3.8472773203345337`*^9}, {3.847277416301323*^9, 3.8472774310812693`*^9}, {
   3.8472774750157623`*^9, 3.847277479177511*^9}, {3.8472775316318893`*^9, 
   3.8472775758940177`*^9}, {3.8472776543078303`*^9, 
   3.8472776815826125`*^9}, {3.8472820829125304`*^9, 3.847282101713642*^9}, {
   3.847282202644628*^9, 3.8472822104353604`*^9}, {3.847282267459462*^9, 
   3.847282310564173*^9}, {3.8472823596584167`*^9, 3.847282370012159*^9}, {
   3.84728242923578*^9, 3.847282460379707*^9}, 3.8472825661218014`*^9, {
   3.847282602620706*^9, 3.847282614768936*^9}, {3.847335149022919*^9, 
   3.8473351951998057`*^9}, {3.847335255588388*^9, 3.8473352622853622`*^9}, 
   3.847335299620603*^9, {3.847335579443143*^9, 3.847335608350524*^9}, {
   3.8473356424322844`*^9, 3.84733571358677*^9}, {3.8473357501219473`*^9, 
   3.8473359066759663`*^9}, {3.847336046522848*^9, 3.847336053503533*^9}, {
   3.8473361964772964`*^9, 3.847336200021795*^9}, {3.8473362736531377`*^9, 
   3.847336288747509*^9}, {3.8473481034081535`*^9, 3.8473481111240797`*^9}, {
   3.848382018287554*^9, 3.8483820505924406`*^9}, {3.8483820856130686`*^9, 
   3.8483821106696844`*^9}, {3.848382145520816*^9, 3.8483821466143074`*^9}, 
   3.848382193853175*^9, {3.8483823158244123`*^9, 3.8483823864694166`*^9}, {
   3.8483824661294794`*^9, 3.848382489858067*^9}, {3.848382561091242*^9, 
   3.848382564293646*^9}, {3.851685314669648*^9, 3.8516853345712028`*^9}, {
   3.851685467649209*^9, 3.8516855020422287`*^9}, {3.8516869238465166`*^9, 
   3.85168695982136*^9}, {3.8516872104938073`*^9, 3.8516872120405083`*^9}, {
   3.851687248756606*^9, 3.8516872707514334`*^9}, {3.8516878641505013`*^9, 
   3.8516880498282366`*^9}, {3.8516882835180893`*^9, 3.851688291032139*^9}, {
   3.851688381385642*^9, 3.85168840174336*^9}, {3.851688516903908*^9, 
   3.8516885512922974`*^9}, 3.8516888509872847`*^9, {3.8516890734305644`*^9, 
   3.8516890753207664`*^9}, 3.8517484648140383`*^9, {3.8517485281857347`*^9, 
   3.8517485619332514`*^9}, 3.8517486580512123`*^9, {3.8517513588686676`*^9, 
   3.8517514073309526`*^9}, {3.851751441541626*^9, 3.851751533068022*^9}, {
   3.851751605597808*^9, 3.851751650071472*^9}, {3.851751914649771*^9, 
   3.8517519306772113`*^9}, {3.8517539209566264`*^9, 3.851753921518944*^9}, {
   3.8517540049156313`*^9, 3.851754040623369*^9}, {3.8517541342577877`*^9, 
   3.851754134913883*^9}, {3.851755580791625*^9, 3.851755632282189*^9}, {
   3.85175566732077*^9, 3.85175576897163*^9}, {3.8517559092694125`*^9, 
   3.8517560125106993`*^9}, {3.851756148759842*^9, 3.8517561999442496`*^9}, {
   3.8517562786755133`*^9, 3.85175632121237*^9}, {3.85175638008928*^9, 
   3.8517564265781727`*^9}, {3.851756473982087*^9, 3.851756555509982*^9}, {
   3.8517565928446894`*^9, 3.851756625102707*^9}, {3.8517567124475203`*^9, 
   3.8517567340361834`*^9}, {3.851756821984413*^9, 3.8517568226248865`*^9}, {
   3.851756969730645*^9, 3.851757070910103*^9}, {3.851757110244399*^9, 
   3.851757111275406*^9}, {3.851757569353534*^9, 3.851757600992166*^9}, {
   3.851757676019738*^9, 3.85175767789157*^9}, {3.8517588302002554`*^9, 
   3.8517588878013997`*^9}, {3.851759072157569*^9, 3.85175907351406*^9}, {
   3.8517591552706633`*^9, 3.851759156705036*^9}, {3.851773137829807*^9, 
   3.851773169748623*^9}, {3.851773221229227*^9, 3.851773236357489*^9}, {
   3.8517733236279716`*^9, 3.8517733853129454`*^9}, {3.8517736188601284`*^9, 
   3.8517736258686404`*^9}, {3.8517737335668736`*^9, 3.851773738860039*^9}, 
   3.85177424731844*^9, {3.8517744746512675`*^9, 3.8517745447581444`*^9}, {
   3.851774585179755*^9, 3.851774618308499*^9}, {3.8517746807891307`*^9, 
   3.851774793080097*^9}, {3.851774873581607*^9, 3.8517749417219224`*^9}, {
   3.8517749856665754`*^9, 3.851775069507588*^9}, {3.8517774656545877`*^9, 
   3.851777466404437*^9}, {3.851777829092969*^9, 3.851777904166011*^9}, {
   3.8517781493109093`*^9, 3.8517782678252363`*^9}, {3.8517783179878016`*^9, 
   3.8517783821043415`*^9}, {3.85177841694917*^9, 3.851778454471308*^9}, {
   3.8517786093640203`*^9, 3.851778649402458*^9}, {3.851778683091739*^9, 
   3.851778693952546*^9}, 3.8517787333336506`*^9, {3.851778860073439*^9, 
   3.8517789122839394`*^9}, 3.851778952979082*^9, {3.8517791570067186`*^9, 
   3.8517791968098183`*^9}, {3.8517792312940693`*^9, 3.851779232715418*^9}, {
   3.8517792716194496`*^9, 3.851779379340855*^9}, {3.851779414021425*^9, 
   3.851779437226183*^9}, {3.8517794772943573`*^9, 3.8517795285549793`*^9}, 
   3.851779599409135*^9, {3.851947825131568*^9, 3.8519478397101264`*^9}, {
   3.8519479427752776`*^9, 3.851948080565038*^9}, {3.85194815725144*^9, 
   3.8519482112936525`*^9}, {3.8519482513071823`*^9, 3.851948300685818*^9}, {
   3.8519483467633505`*^9, 3.851948421926777*^9}, {3.854599917707138*^9, 
   3.854600013569354*^9}, {3.854712805139721*^9, 3.854712813811827*^9}, 
   3.85471512724292*^9, 3.8547154313136697`*^9, 3.854715541926668*^9, 
   3.854715944297141*^9, 3.8547754142715487`*^9, {3.8547755264962225`*^9, 
   3.8547755281675076`*^9}, {3.8547757270426426`*^9, 3.854775759334991*^9}, {
   3.8547757926492653`*^9, 3.85477579305542*^9}, {3.8547768647573757`*^9, 
   3.854776888796584*^9}, {3.8547769897774916`*^9, 3.854777019479389*^9}, {
   3.8547782128710985`*^9, 3.854778230252418*^9}, {3.8551982248697605`*^9, 
   3.855198277906287*^9}, {3.8551983360656457`*^9, 3.855198378165367*^9}, {
   3.855198503562776*^9, 3.855198531540599*^9}, {3.8551986228954463`*^9, 
   3.855198632533785*^9}, {3.8551987815217276`*^9, 3.855198791160095*^9}, {
   3.8552109863220525`*^9, 3.855210987618623*^9}, 3.855214762411118*^9, {
   3.856011846562994*^9, 3.856011846734826*^9}, 3.8560878091302457`*^9, 
   3.856087843090822*^9, {3.8560879184455433`*^9, 3.856087963059487*^9}, {
   3.8560880649683847`*^9, 3.856088202612194*^9}, 3.856088353238575*^9, {
   3.8560883909865675`*^9, 3.8560884115561733`*^9}, {3.8560884566794767`*^9, 
   3.856088466752247*^9}, {3.8560892251039495`*^9, 3.856089228351763*^9}, 
   3.8560897910955305`*^9, 3.856090309417139*^9, {3.8560904253453856`*^9, 
   3.8560904291870055`*^9}, {3.856091411499737*^9, 3.8560914171155396`*^9}, 
   3.8560914677276793`*^9, {3.8560929829811707`*^9, 3.8560930025763435`*^9}, {
   3.856093034916766*^9, 3.856093040136408*^9}, 3.8560936656415873`*^9, {
   3.8560946746845627`*^9, 3.8560947386523623`*^9}, 3.8560948723914704`*^9, {
   3.8560949180506277`*^9, 3.8560949209652853`*^9}, {3.8560949813293114`*^9, 
   3.8560949895195255`*^9}, {3.856096770884041*^9, 3.8560967982143965`*^9}, {
   3.8562662119601536`*^9, 3.8562662387117453`*^9}, {3.8562662738353577`*^9, 
   3.85626634798162*^9}, {3.8562664068280306`*^9, 3.8562664493400946`*^9}, {
   3.856266491656769*^9, 3.8562665542320075`*^9}, {3.8562666093858414`*^9, 
   3.856266616914109*^9}, 3.8562666503855114`*^9, 3.856266731222801*^9, {
   3.8562667623716664`*^9, 3.856266763340187*^9}, {3.856266817889781*^9, 
   3.8562669903836803`*^9}, {3.856267028970646*^9, 3.8562674280048995`*^9}, {
   3.856267489320221*^9, 3.8562675036762*^9}, {3.8562675747686973`*^9, 
   3.85626772736058*^9}, {3.856268275993417*^9, 3.856268308782513*^9}, {
   3.8562683880938034`*^9, 3.8562684345515585`*^9}, {3.856268464669392*^9, 
   3.856268483055673*^9}, {3.856268600184104*^9, 3.8562686093384027`*^9}, {
   3.8562686627942486`*^9, 3.8562686713562837`*^9}, {3.856268715189642*^9, 
   3.85626872318774*^9}, {3.8562688858849354`*^9, 3.8562689033964076`*^9}, {
   3.8562689706460557`*^9, 3.8562689783161087`*^9}, {3.8562690119511585`*^9, 
   3.856269027838032*^9}, {3.8562692047059155`*^9, 3.8562692060962067`*^9}, {
   3.8562692889079857`*^9, 3.8562692982027073`*^9}, {3.856269339677191*^9, 
   3.856269382573267*^9}, {3.856269415565442*^9, 3.856269435654676*^9}, {
   3.8562694723563094`*^9, 3.856269557617446*^9}, {3.856269592702757*^9, 
   3.8562695966393237`*^9}, {3.8562697389401054`*^9, 3.856269757199979*^9}, {
   3.8562698668960752`*^9, 3.8562698804551315`*^9}, 3.8562699452694855`*^9, {
   3.8562700055975056`*^9, 3.856270024858776*^9}, 3.856270062059145*^9, {
   3.8562701015654116`*^9, 3.856270107938883*^9}, {3.8562708100480924`*^9, 
   3.856270885842801*^9}, 3.856270961293467*^9, {3.8562711191233764`*^9, 
   3.8562711470871487`*^9}, {3.8562711940291367`*^9, 
   3.8562712004963613`*^9}, {3.8562712551100063`*^9, 
   3.8562712731059637`*^9}, {3.856271326739816*^9, 3.856271327005192*^9}, 
   3.8562715582179365`*^9, {3.85635050737883*^9, 3.8563505384237394`*^9}, {
   3.8563507814405966`*^9, 3.8563508153988123`*^9}, {3.856403365288825*^9, 
   3.8564033725059032`*^9}, 3.8564034328061533`*^9, {3.856403677833009*^9, 
   3.8564036865653663`*^9}, 3.856403890866742*^9, {3.8564041266115713`*^9, 
   3.8564041422014694`*^9}, 3.8564041731184883`*^9, {3.856416050425877*^9, 
   3.8564160637664623`*^9}, {3.856416280935495*^9, 3.856416287355866*^9}, {
   3.856416959202245*^9, 3.8564169628422403`*^9}, {3.8564170881878357`*^9, 
   3.8564170929365063`*^9}, {3.8564211371406746`*^9, 
   3.8564211381260867`*^9}, {3.8584271961336045`*^9, 3.858427205893742*^9}, 
   3.858429013129891*^9, {3.8584294949592237`*^9, 3.8584294959118695`*^9}, {
   3.858429584832994*^9, 3.8584295943151016`*^9}, 3.8584301369616175`*^9, {
   3.858430339552408*^9, 3.85843034217698*^9}, 3.8584315237909*^9, {
   3.8584315538161883`*^9, 3.858431583077695*^9}, {3.8586481763032894`*^9, 
   3.8586482132321167`*^9}, {3.8586482662196245`*^9, 
   3.8586482788262625`*^9}, {3.8586520958274355`*^9, 
   3.8586520974052067`*^9}, {3.8586521767410717`*^9, 
   3.8586522948195953`*^9}, {3.858652332447443*^9, 3.8586523344626207`*^9}, {
   3.8586524266083574`*^9, 3.858652428795418*^9}, {3.858652466641944*^9, 
   3.8586524687664547`*^9}, 3.858652635278686*^9, 3.8586526698572216`*^9, {
   3.8586527015549583`*^9, 3.8586527915947876`*^9}, {3.8586528245985355`*^9, 
   3.858652908923914*^9}, {3.8586530994435596`*^9, 3.858653197242655*^9}, {
   3.8586532352464437`*^9, 3.8586532454784384`*^9}, {3.8586534506699677`*^9, 
   3.8586535085142584`*^9}, {3.858653623629122*^9, 3.8586536312142105`*^9}, {
   3.8586545877607684`*^9, 3.858654593790846*^9}, {3.858654662936039*^9, 
   3.8586546703699636`*^9}, {3.8586551608986635`*^9, 3.858655207035569*^9}, {
   3.8586552560515184`*^9, 3.858655256691988*^9}, {3.858655294051999*^9, 
   3.8586552945676804`*^9}, {3.8586553251959395`*^9, 3.858655329055599*^9}, {
   3.8586554034905972`*^9, 3.8586554039594183`*^9}, {3.8586562167494545`*^9, 
   3.8586562419891367`*^9}, {3.858656345853464*^9, 3.8586563472281446`*^9}, {
   3.85865642554783*^9, 3.8586564274223795`*^9}, 3.858656609260376*^9, {
   3.8586567791800585`*^9, 3.8586567938415623`*^9}, {3.858656843604476*^9, 
   3.8586568448541813`*^9}, 3.858657264350212*^9, 3.8586578643727827`*^9, {
   3.8586603501435423`*^9, 3.8586603610776873`*^9}, {3.858665299710614*^9, 
   3.858665304568842*^9}, {3.85866660066634*^9, 3.858666631320428*^9}, 
   3.8588324708255205`*^9, 3.858834680023713*^9, {3.858834816319806*^9, 
   3.8588348245678115`*^9}, {3.859371068746986*^9, 3.859371071760897*^9}, {
   3.859371119092376*^9, 3.859371120263667*^9}, {3.86058476409734*^9, 
   3.860584765722186*^9}, {3.860584841536561*^9, 3.8605848473633127`*^9}, {
   3.860584881556029*^9, 3.8605849345190516`*^9}, {3.8605849810705805`*^9, 
   3.860585005457756*^9}, {3.8605850393795395`*^9, 3.8605850418789215`*^9}, {
   3.8605851656060953`*^9, 3.860585194270255*^9}, 3.86063381286031*^9, {
   3.860633853041381*^9, 3.8606338605381393`*^9}, {3.86063401668987*^9, 
   3.8606340194591556`*^9}, {3.8606344973969564`*^9, 
   3.8606345323857527`*^9}, {3.8606351162938786`*^9, 
   3.8606351169534793`*^9}, {3.860635337183052*^9, 3.860635337760549*^9}, {
   3.8606415668765078`*^9, 3.860641595432556*^9}, {3.8606478264186707`*^9, 
   3.860647827262169*^9}, {3.860652123064255*^9, 3.8606521235797577`*^9}, {
   3.860652155786443*^9, 3.8606521736104174`*^9}, 3.8606522667603283`*^9, {
   3.8606696247237062`*^9, 3.8606696733079042`*^9}, {3.860669722427417*^9, 
   3.860669749858634*^9}, {3.8606698523428307`*^9, 3.8606698539051495`*^9}, {
   3.860670121437567*^9, 3.860670162149023*^9}, {3.860670218651143*^9, 
   3.8606702191509986`*^9}, {3.860670257720063*^9, 3.8606702608755703`*^9}, 
   3.860670357321578*^9, {3.8608393202951083`*^9, 3.860839327144682*^9}, {
   3.8608395360225525`*^9, 3.860839568560756*^9}, {3.860839626109659*^9, 
   3.8608396316532125`*^9}, {3.860839972322068*^9, 3.8608399940349*^9}, {
   3.8608404196123*^9, 3.860840428309719*^9}, {3.860840480919987*^9, 
   3.860840481588693*^9}, {3.860840536412998*^9, 3.8608405379998827`*^9}, {
   3.860840633619918*^9, 3.8608406562135906`*^9}, {3.8608407583448086`*^9, 
   3.86084082336386*^9}, {3.8608409345127068`*^9, 3.8608409351678333`*^9}, {
   3.86084105988897*^9, 3.8608410940155354`*^9}, {3.8608413360670547`*^9, 
   3.8608413526004543`*^9}, {3.860841580986247*^9, 3.8608416011112056`*^9}, {
   3.8608422038020997`*^9, 3.860842221049014*^9}, {3.861189494194888*^9, 
   3.861189496865979*^9}, {3.86119056512847*^9, 3.8611905745824733`*^9}, {
   3.8623951441743917`*^9, 3.862395332697236*^9}, 3.8623954053114996`*^9, {
   3.8623954515841923`*^9, 3.862395460222004*^9}, {3.8623954945791407`*^9, 
   3.8623955137183037`*^9}, {3.8660302713825264`*^9, 3.866030337362257*^9}, {
   3.866030384199373*^9, 3.866030387221998*^9}, {3.8660304455012183`*^9, 
   3.86603045174081*^9}, 3.8660304894842587`*^9, {3.866030521373296*^9, 
   3.8660305586282616`*^9}, {3.866030614763479*^9, 3.8660306659044685`*^9}, {
   3.8660307613617854`*^9, 3.866030762060894*^9}, {3.8660310546728954`*^9, 
   3.866031056175705*^9}, {3.8660310921140585`*^9, 3.866031146420473*^9}, {
   3.8660311791309633`*^9, 3.866031200311365*^9}, {3.8660312314096565`*^9, 
   3.866031241931346*^9}, {3.866031324694192*^9, 3.866031325350662*^9}, {
   3.866031457842277*^9, 3.866031507743291*^9}, {3.866031880228698*^9, 
   3.866031880492361*^9}, {3.8660324701975784`*^9, 3.8660324985124407`*^9}, 
   3.8660329083951635`*^9, {3.866032968792328*^9, 3.8660329840716352`*^9}, {
   3.8660330169777985`*^9, 3.8660330189062614`*^9}, {3.866033263425213*^9, 
   3.8660332645801954`*^9}, {3.866033330572257*^9, 3.866033338213289*^9}, {
   3.866033387401261*^9, 3.866033515161322*^9}, {3.8660335582511983`*^9, 
   3.866033699071883*^9}, {3.866034422386823*^9, 3.8660344250868125`*^9}, {
   3.866034715446395*^9, 3.866034741528534*^9}, {3.8660360006263256`*^9, 
   3.8660360258694735`*^9}, 3.866036152124239*^9, {3.8660361840113077`*^9, 
   3.86603620775145*^9}, 3.8661105600569468`*^9, {3.8661107034833593`*^9, 
   3.866110704373953*^9}, {3.875252039701647*^9, 3.8752521345374413`*^9}, {
   3.87525217036486*^9, 3.8752522042110543`*^9}, {3.875252266991767*^9, 
   3.8752522986748376`*^9}, {3.875252352438511*^9, 3.8752523593003225`*^9}, {
   3.8752525327379975`*^9, 3.87525278979325*^9}, {3.875252831443841*^9, 
   3.875252836821469*^9}, 3.8752528699366837`*^9, {3.875252908088583*^9, 
   3.87525300546593*^9}, 3.8752530424377193`*^9, {3.875255574419004*^9, 
   3.8752555750597043`*^9}, 3.8752569278819833`*^9, {3.875257063050617*^9, 
   3.8752570947295218`*^9}, {3.8752572043558784`*^9, 3.87525740828583*^9}, {
   3.875257459119563*^9, 3.8752575295557194`*^9}, {3.875257573175683*^9, 
   3.8752577386650667`*^9}, {3.8752652287783237`*^9, 3.875265241957513*^9}, 
   3.875265304424884*^9, {3.875265420233203*^9, 3.87526542108295*^9}, {
   3.8752654618834095`*^9, 3.875265489878763*^9}, {3.8752655471708193`*^9, 
   3.8752655751850033`*^9}, {3.875265636874062*^9, 3.8752656501038237`*^9}, {
   3.875265695612814*^9, 3.875265696380233*^9}, {3.8752657639813604`*^9, 
   3.8752657864548655`*^9}, {3.875265848705569*^9, 3.8752659216572237`*^9}, {
   3.875265965588888*^9, 3.8752660440579505`*^9}, {3.875266110072715*^9, 
   3.87526629386637*^9}, {3.8752663442753315`*^9, 3.875266371186722*^9}, 
   3.8752664039434166`*^9, {3.875266559879711*^9, 3.875266595178238*^9}, {
   3.8752666284623585`*^9, 3.875266738321266*^9}, {3.8752667772410216`*^9, 
   3.875266783869523*^9}, {3.8752668540128927`*^9, 3.8752669946998067`*^9}, {
   3.8752670274305353`*^9, 3.8752671075967836`*^9}, {3.8752671410618625`*^9, 
   3.875267394204073*^9}, {3.875267450946727*^9, 3.875267465039198*^9}, {
   3.8752675069617124`*^9, 3.8752675279270782`*^9}, {3.8752676117911987`*^9, 
   3.8752676239067087`*^9}, {3.8752677023281384`*^9, 3.875267718834984*^9}, {
   3.875268053109141*^9, 3.875268096754485*^9}, 3.875268161197198*^9, {
   3.875268240935447*^9, 3.8752682598389816`*^9}, {3.8752682931955576`*^9, 
   3.8752684604038105`*^9}, {3.8752685004645653`*^9, 3.8752685199947014`*^9}, 
   3.875268578300739*^9, {3.875268657515362*^9, 3.875268768149472*^9}, 
   3.8752688049354525`*^9, {3.875268877394225*^9, 3.8752689284114485`*^9}, {
   3.875269008423587*^9, 3.875269026791527*^9}, {3.8752690594474816`*^9, 
   3.875269094079098*^9}, {3.8752691505004444`*^9, 3.8752691803849936`*^9}, {
   3.87526921047479*^9, 3.8752692217078247`*^9}, {3.8752692661343746`*^9, 
   3.875269302784354*^9}, {3.875269359547612*^9, 3.8752693614263334`*^9}, 
   3.8752694069698844`*^9, 3.875269474303279*^9, {3.8752695132348776`*^9, 
   3.875269516391621*^9}, {3.8752695522416306`*^9, 3.8752695550855*^9}, {
   3.875269653938826*^9, 3.875269664187851*^9}, 3.8752697186167507`*^9, 
   3.8752697490714664`*^9, {3.875269782629108*^9, 3.875269823438157*^9}, {
   3.875269858543559*^9, 3.8752698599855175`*^9}, {3.875269892936139*^9, 
   3.875269896199344*^9}, {3.875269929073513*^9, 3.8752699345226865`*^9}, {
   3.87527001036625*^9, 3.8752701954378967`*^9}, {3.8752702279043903`*^9, 
   3.875270245796696*^9}, {3.875270293059309*^9, 3.8752702934158363`*^9}, {
   3.875270339112299*^9, 3.8752703536744113`*^9}, {3.875270388342248*^9, 
   3.875270415811427*^9}, {3.8752704485112715`*^9, 3.875270516287568*^9}, {
   3.875271183413558*^9, 3.875271213593345*^9}, {3.875271364066761*^9, 
   3.875271389132249*^9}, {3.875588360789626*^9, 3.8755884557527866`*^9}, {
   3.8755884939093447`*^9, 3.8755885669066896`*^9}, {3.8755886155787373`*^9, 
   3.875588631265973*^9}, 3.8755887904967356`*^9, 3.875590988573164*^9, {
   3.8755911414849854`*^9, 3.875591157128592*^9}, {3.87559121567149*^9, 
   3.8755912301480885`*^9}, {3.8755912942478013`*^9, 3.875591334287779*^9}, {
   3.8755913673558125`*^9, 3.8755913741471586`*^9}},
 CellLabel->"In[6]:=",ExpressionUUID->"9fd071ca-48b5-4a16-a731-add715db2899"],

Cell[BoxData[
 TagBox[
  StyleBox[
   DynamicModuleBox[{$CellContext`cAo$$ = 5, $CellContext`cEo$$ = 
    1, $CellContext`cFo$$ = 0, $CellContext`cIo$$ = 0, $CellContext`cPo$$ = 
    0, $CellContext`cQo$$ = 0, $CellContext`ka$$ = 0.005, $CellContext`kd$$ = 
    0.05, $CellContext`PingPong$$ = 1, Typeset`show$$ = True, 
    Typeset`bookmarkList$$ = {}, Typeset`bookmarkMode$$ = "Menu", 
    Typeset`animator$$, Typeset`animvar$$ = 1, Typeset`name$$ = 
    "\"untitled\"", Typeset`specs$$ = {{{
       Hold[$CellContext`cAo$$], 5, 
       "[A\!\(\*SubscriptBox[\(]\), \(0\)]\),\!\(\*FormBox[RowBox[{\" \", \
RowBox[{\"mol\", \" \", \
SuperscriptBox[RowBox[{StyleBox[\"m\",FontSlant->\"Plain\"], \" \"}], \
RowBox[{\"\[Dash]\", \"3\"}]]}]}],TraditionalForm]\)"}, 0.1, 10}, {{
       Hold[$CellContext`cEo$$], 1, 
       "[E\!\(\*SubscriptBox[\(]\), \(0\)]\),\!\(\*FormBox[RowBox[{\" \", \
RowBox[{\"mol\", \" \", \
SuperscriptBox[RowBox[{StyleBox[\"m\",FontSlant->\"Plain\"], \" \"}], \
RowBox[{\"\[Dash]\", \"3\"}]]}]}],TraditionalForm]\)"}, 0.1, 2}, {{
       Hold[$CellContext`cFo$$], 0, 
       "[F\!\(\*SubscriptBox[\(]\), \(0\)]\),\!\(\*FormBox[RowBox[{\" \", \
RowBox[{\"mol\", \" \", \
SuperscriptBox[RowBox[{StyleBox[\"m\",FontSlant->\"Plain\"], \" \"}], \
RowBox[{\"\[Dash]\", \"3\"}]]}]}],TraditionalForm]\)"}, 0, 0}, {{
       Hold[$CellContext`cPo$$], 0, 
       "[P\!\(\*SubscriptBox[\(]\), \(0\)]\),\!\(\*FormBox[RowBox[{\" \", \
RowBox[{\"mol\", \" \", \
SuperscriptBox[RowBox[{StyleBox[\"m\",FontSlant->\"Plain\"], \" \"}], \
RowBox[{\"\[Dash]\", \"3\"}]]}]}],TraditionalForm]\)"}, 0, 0}, {{
       Hold[$CellContext`cQo$$], 0, 
       "[Q\!\(\*SubscriptBox[\(]\), \(0\)]\),\!\(\*FormBox[RowBox[{\" \", \
RowBox[{\"mol\", \" \", \
SuperscriptBox[RowBox[{StyleBox[\"m\",FontSlant->\"Plain\"], \" \"}], \
RowBox[{\"\[Dash]\", \"3\"}]]}]}],TraditionalForm]\)"}, 0, 0}, {{
       Hold[$CellContext`cIo$$], 0, 
       "[I\!\(\*SubscriptBox[\(]\), \(0\)]\),\!\(\*FormBox[RowBox[{\" \", \
RowBox[{\"mol\", \" \", \
SuperscriptBox[RowBox[{StyleBox[\"m\",FontSlant->\"Plain\"], \" \"}], \
RowBox[{\"\[Dash]\", \"3\"}]]}]}],TraditionalForm]\)"}, 0, 0}, {{
       Hold[$CellContext`ka$$], 0.005, 
       "\!\(\*SubscriptBox[StyleBox[\"k\",FontSlant->\"Italic\"], \"a\"]\), \
\!\(\*FormBox[RowBox[{SuperscriptBox[StyleBox[\"s\",FontSlant->\"Plain\"], \
RowBox[{\"\[Dash]\", \"1\"}]], \" \", SuperscriptBox[\"mol\", RowBox[{\"\
\[Dash]\", \"1\"}]], \" \", \
SuperscriptBox[StyleBox[\"m\",FontSlant->\"Plain\"], \
\"3\"]}],TraditionalForm]\)"}, 0.001, 0.01}, {{
       Hold[$CellContext`kd$$], 0.05, 
       "\!\(\*SubscriptBox[StyleBox[\"k\",FontSlant->\"Italic\"], \"d\"]\), \
\!\(\*FormBox[RowBox[{SuperscriptBox[StyleBox[\"s\",FontSlant->\"Plain\"], \
RowBox[{\"\[Dash]\", \"1\"}]], \" \", SuperscriptBox[\"mol\", RowBox[{\"\
\[Dash]\", \"1\"}]], \" \", \
SuperscriptBox[StyleBox[\"m\",FontSlant->\"Plain\"], \
\"3\"]}],TraditionalForm]\)"}, 0.001, 0.1}, {{
       Hold[$CellContext`PingPong$$], 1, "Panels"}, {
      1 -> "A", 2 -> "B", 3 -> "C"}}, {
      Hold[
       Row[{
         Column[{
           Style["REACTANTS CONCENTRATIONS:", Bold], 
           Manipulate`Place[1], 
           Manipulate`Place[2], 
           Manipulate`Place[3], 
           Manipulate`Place[4], 
           Manipulate`Place[5], 
           Manipulate`Place[6]}], 
         Column[{
           Style["RATE CONSTANTS:", Bold], 
           Manipulate`Place[7], 
           Manipulate`Place[8]}], 
         Manipulate`Place[9]}]], Manipulate`Dump`ThisIsNotAControl}}, 
    Typeset`size$$ = {576., {183., 189.}}, Typeset`update$$ = 0, 
    Typeset`initDone$$, Typeset`skipInitDone$$ = True}, 
    DynamicBox[Manipulate`ManipulateBoxes[
     2, StandardForm, 
      "Variables" :> {$CellContext`cAo$$ = 5, $CellContext`cEo$$ = 
        1, $CellContext`cFo$$ = 0, $CellContext`cIo$$ = 0, $CellContext`cPo$$ = 
        0, $CellContext`cQo$$ = 0, $CellContext`ka$$ = 
        0.005, $CellContext`kd$$ = 0.05, $CellContext`PingPong$$ = 1}, 
      "ControllerVariables" :> {}, 
      "OtherVariables" :> {
       Typeset`show$$, Typeset`bookmarkList$$, Typeset`bookmarkMode$$, 
        Typeset`animator$$, Typeset`animvar$$, Typeset`name$$, 
        Typeset`specs$$, Typeset`size$$, Typeset`update$$, Typeset`initDone$$,
         Typeset`skipInitDone$$}, "Body" :> 
      Module[{$CellContext`PingPongModel1$, $CellContext`PingPongModel2$, \
$CellContext`PingPongModel3$, $CellContext`soln$, $CellContext`eqAns$, \
$CellContext`eqAss$, $CellContext`eqPns$, $CellContext`eqPss$, \
$CellContext`eqQns$, $CellContext`eqQss$, $CellContext`eqPQns$, \
$CellContext`eqPQss$, $CellContext`eqEns$, $CellContext`eqEss$, \
$CellContext`eqFns$, $CellContext`eqFss$, $CellContext`eqAnsD$, \
$CellContext`eqAssD$, $CellContext`eqPnsD$, $CellContext`eqPssD$, \
$CellContext`eqQnsD$, $CellContext`eqQssD$, $CellContext`plot1$, \
$CellContext`plot2$, $CellContext`plot3$}, $CellContext`PingPongModel1$ = 
         Sequence[
          PlotRange -> Full, PlotLabel -> 
           Style["Ping-Pong Reaction with One Substrate Undergoing \
Disproportionation\nin the Absence of Suicide Substrate Inactivation \
(\!\(\*SubscriptBox[StyleBox[\"k\",FontSlant->\"Italic\"], \"c\"]\) \
\[RightArrow] \[Infinity] and \
\!\(\*SubscriptBox[StyleBox[\"k\",FontSlant->\"Italic\"], \"f\"]\) \
\[RightArrow] \[Infinity]):\nA + E \[LongRightArrow] P + F\nA + F \
\[LongRightArrow] Q + E\n", FontSize -> 14], Frame -> True, 
           FrameLabel -> {
            "Time, s", 
             "[ ], \!\(\*FormBox[RowBox[{\"mol\", \" \", \
SuperscriptBox[RowBox[{StyleBox[\"m\",FontSlant->\"Plain\"], \" \"}], \
RowBox[{\"\[Dash]\", \"3\"}]]}],TraditionalForm]\)"}, 
           LabelStyle -> {FontSize -> 14}, ImageSize -> 
           1.2 {480, 310}]; $CellContext`PingPongModel2$ = 
         Sequence[
          PlotRange -> {{0, 50}, {0, 0.069}}, PlotLabel -> 
           Style["Ping-Pong Reaction with One Substrate Undergoing \
Disproportionation\nin the Absence of Suicide Substrate Inactivation \
(\!\(\*SubscriptBox[StyleBox[\"k\",FontSlant->\"Italic\"], \"c\"]\) \
\[RightArrow] \[Infinity] and \
\!\(\*SubscriptBox[StyleBox[\"k\",FontSlant->\"Italic\"], \"f\"]\) \
\[RightArrow] \[Infinity]):\nA + E \[LongRightArrow] P + F\nA + F \
\[LongRightArrow] Q + E", FontSize -> 14], Frame -> True, 
           FrameLabel -> {
            "Time, s", 
             "[ ], \!\(\*FormBox[RowBox[{\"mol\", \" \", \
SuperscriptBox[RowBox[{StyleBox[\"m\",FontSlant->\"Plain\"], \" \"}], \
RowBox[{\"\[Dash]\", \"3\"}]], \
SuperscriptBox[RowBox[{StyleBox[\"s\",FontSlant->\"Plain\"], \" \"}], \
RowBox[{\"\[Dash]\", \"1\"}]]}],TraditionalForm]\)"}, 
           LabelStyle -> {FontSize -> 14}, ImageSize -> 
           1.2 {480, 310}]; $CellContext`PingPongModel3$ = 
         Sequence[
          PlotRange -> {{0, 50}, {-0.05, 1.05}}, PlotLabel -> 
           Style["Ping-Pong Reaction with One Substrate Undergoing \
Disproportionation\nin the Absence of Suicide Substrate Inactivation \
(\!\(\*SubscriptBox[StyleBox[\"k\",FontSlant->\"Italic\"], \"c\"]\) \
\[RightArrow] \[Infinity] and \
\!\(\*SubscriptBox[StyleBox[\"k\",FontSlant->\"Italic\"], \"f\"]\) \
\[RightArrow] \[Infinity]):\nA + E \[LongRightArrow] P + F\nA + F \
\[LongRightArrow] Q + E\n", FontSize -> 14], Frame -> True, 
           FrameLabel -> {
            "Time, s", 
             "[ ], \!\(\*FormBox[RowBox[{\"mol\", \" \", \
SuperscriptBox[RowBox[{StyleBox[\"m\",FontSlant->\"Plain\"], \" \"}], \
RowBox[{\"\[Dash]\", \"3\"}]]}],TraditionalForm]\)"}, 
           LabelStyle -> {FontSize -> 14}, ImageSize -> 
           1.2 {480, 310}]; $CellContext`soln$ = 
         NDSolve[{-
             Derivative[
              1][$CellContext`cA][$CellContext`t] == $CellContext`ka$$ \
$CellContext`cA[$CellContext`t] $CellContext`cE[$CellContext`t] + \
$CellContext`kd$$ $CellContext`cA[$CellContext`t] \
$CellContext`cF[$CellContext`t], -
             Derivative[
              1][$CellContext`cE][$CellContext`t] == $CellContext`ka$$ \
$CellContext`cA[$CellContext`t] $CellContext`cE[$CellContext`t] - \
$CellContext`kd$$ $CellContext`cA[$CellContext`t] \
$CellContext`cF[$CellContext`t], 
            Derivative[
             1][$CellContext`cF][$CellContext`t] == $CellContext`ka$$ \
$CellContext`cA[$CellContext`t] $CellContext`cE[$CellContext`t] - \
$CellContext`kd$$ $CellContext`cA[$CellContext`t] \
$CellContext`cF[$CellContext`t], 
            Derivative[
             1][$CellContext`cP][$CellContext`t] == $CellContext`ka$$ \
$CellContext`cA[$CellContext`t] $CellContext`cE[$CellContext`t], 
            Derivative[
             1][$CellContext`cQ][$CellContext`t] == $CellContext`kd$$ \
$CellContext`cA[$CellContext`t] $CellContext`cF[$CellContext`t], \
$CellContext`cA[0] == $CellContext`cAo$$, $CellContext`cE[
             0] == $CellContext`cEo$$, $CellContext`cF[
             0] == $CellContext`cFo$$, $CellContext`cP[
             0] == $CellContext`cPo$$, $CellContext`cQ[
             0] == $CellContext`cQo$$}, {$CellContext`cA, $CellContext`cE, \
$CellContext`cF, $CellContext`cP, $CellContext`cQ}, {$CellContext`t, 0., 
            250}]; $CellContext`eqAns$ = ReplaceAll[
           $CellContext`cA[$CellContext`t], $CellContext`soln$]; \
$CellContext`eqAss$ = $CellContext`cAo$$ 
          E^(-(2 $CellContext`cEo$$ $CellContext`ka$$ $CellContext`kd$$ \
$CellContext`t/($CellContext`ka$$ + $CellContext`kd$$))); $CellContext`eqPns$ = 
         ReplaceAll[
           $CellContext`cP[$CellContext`t], $CellContext`soln$]; \
$CellContext`eqPss$ = (1/2) $CellContext`cAo$$ (1 - 
           E^(-(2 $CellContext`cEo$$ $CellContext`ka$$ $CellContext`kd$$ \
$CellContext`t/($CellContext`ka$$ + $CellContext`kd$$)))); \
$CellContext`eqQns$ = ReplaceAll[
           $CellContext`cQ[$CellContext`t], $CellContext`soln$]; \
$CellContext`eqQss$ = (1/2) $CellContext`cAo$$ (1 - 
           E^(-(2 $CellContext`cEo$$ $CellContext`ka$$ $CellContext`kd$$ \
$CellContext`t/($CellContext`ka$$ + $CellContext`kd$$)))); \
$CellContext`eqPQns$ = 
         ReplaceAll[$CellContext`cP[$CellContext`t] + \
$CellContext`cQ[$CellContext`t], $CellContext`soln$]; $CellContext`eqPQss$ = \
$CellContext`cAo$$ (1 - 
           E^(-(2 $CellContext`cEo$$ $CellContext`ka$$ $CellContext`kd$$ \
$CellContext`t/($CellContext`ka$$ + $CellContext`kd$$)))); \
$CellContext`eqEns$ = ReplaceAll[
           $CellContext`cE[$CellContext`t], $CellContext`soln$]; \
$CellContext`eqEss$ = $CellContext`cEo$$ $CellContext`kd$$/($CellContext`ka$$ + \
$CellContext`kd$$); $CellContext`eqFns$ = ReplaceAll[
           $CellContext`cF[$CellContext`t], $CellContext`soln$]; \
$CellContext`eqFss$ = $CellContext`cEo$$ $CellContext`ka$$/($CellContext`ka$$ + \
$CellContext`kd$$); $CellContext`eqAnsD$ = 
         ReplaceAll[-
           Derivative[
            1][$CellContext`cA][$CellContext`t], $CellContext`soln$]; \
$CellContext`eqAssD$ = -
          D[$CellContext`cAo$$ 
            E^(-(2 $CellContext`cEo$$ $CellContext`ka$$ $CellContext`kd$$ \
$CellContext`t/($CellContext`ka$$ + $CellContext`kd$$))), $CellContext`t]; \
$CellContext`eqPnsD$ = ReplaceAll[
           Derivative[
           1][$CellContext`cP][$CellContext`t], $CellContext`soln$]; \
$CellContext`eqPssD$ = 
         D[(1/2) $CellContext`cAo$$ (1 - 
            E^(-(2 $CellContext`cEo$$ $CellContext`ka$$ $CellContext`kd$$ \
$CellContext`t/($CellContext`ka$$ + $CellContext`kd$$)))), $CellContext`t]; \
$CellContext`eqQnsD$ = ReplaceAll[
           Derivative[
           1][$CellContext`cQ][$CellContext`t], $CellContext`soln$]; \
$CellContext`eqQssD$ = 
         D[(1/2) $CellContext`cAo$$ (1 - 
            E^(-(2 $CellContext`cEo$$ $CellContext`ka$$ $CellContext`kd$$ \
$CellContext`t/($CellContext`ka$$ + $CellContext`kd$$)))), $CellContext`t]; \
$CellContext`plot1$ = 
         Plot[{$CellContext`eqAns$, $CellContext`eqAss$, $CellContext`eqPns$, \
$CellContext`eqPss$, $CellContext`eqQns$, $CellContext`eqQss$; \
$CellContext`eqPQns$, $CellContext`eqPQss$}, {$CellContext`t, 0., 250}, 
           Evaluate[$CellContext`PingPongModel1$], 
           PlotStyle -> {{Thick, Pink}, {Thick, 
              Darker[Blue], Dashed}, {Thick, Brown}, {Thick, Dashed, Red}, {
             Thick, 
              Darker[Green]}, {Thick, Blue}, {Thick, Green, Dashed}}, Epilog -> {
             Inset[
              Style[
              "[A\!\(\*SubscriptBox[\(]\), \(ns\)]\)", 12, Background -> 
               White], {50, 
               ReplaceAll[0.5 + $CellContext`cA[50], 
                Part[$CellContext`soln$, 1]]}], 
             Inset[
              Style[
              "[A\!\(\*SubscriptBox[\(]\), \(ss\)]\)", 12, Background -> 
               White], {25, 
               ReplaceAll[-0.5 + $CellContext`eqAss$, $CellContext`t -> 25]}], 
             Inset[
              Style[
              "[P\!\(\*SubscriptBox[\(]\), \(ns\)]\)", 12, Background -> 
               White], {75, 
               ReplaceAll[0.4 + $CellContext`cP[75], 
                Part[$CellContext`soln$, 1]]}], 
             Inset[
              Style[
              "[P\!\(\*SubscriptBox[\(]\), \(ss\)]\) or [Q\!\(\*SubscriptBox[\
\(]\), \(ss\)]\)", 12, Background -> White], {200, 
               ReplaceAll[0.5 + $CellContext`eqPss$, $CellContext`t -> 200]}], 
             Inset[
              Style[
              "[Q\!\(\*SubscriptBox[\(]\), \(ns\)]\)", 12, Background -> 
               White], {110, 
               ReplaceAll[-0.5 + $CellContext`cQ[110], 
                Part[$CellContext`soln$, 1]]}], 
             Inset[
              Style[
              "([P]+[Q]\!\(\*SubscriptBox[\()\), \(ns\)]\)", 12, Background -> 
               White], {225, 
               ReplaceAll[-0.5 + $CellContext`cP[225] + $CellContext`cQ[225], 
                Part[$CellContext`soln$, 1]]}], 
             Inset[
              Style[
              "([P]+[Q]\!\(\*SubscriptBox[\()\), \(ss\)]\)", 12, Background -> 
               White], {125, 
               ReplaceAll[
               0.5 + $CellContext`eqPQss$, $CellContext`t -> 
                125]}]}]; $CellContext`plot2$ = 
         Plot[{$CellContext`eqAnsD$, $CellContext`eqAssD$, \
$CellContext`eqPnsD$, $CellContext`eqPssD$, $CellContext`eqQnsD$, \
$CellContext`eqQssD$; Null}, {$CellContext`t, 0, 250}, 
           Evaluate[$CellContext`PingPongModel2$], 
           PlotStyle -> {{Thick, Pink}, {Thick, 
              Darker[Cyan], Dashed}, {Thick, Brown}, {Thick, Dashed, Red}, {
             Thick, 
              Darker[Green]}}, Epilog -> {
             Inset[
              Style[
              "[A]\!\(\*SubscriptBox[\('\), \(ns\)]\)", 12, Background -> 
               White], {5, 
               ReplaceAll[-0.005 - Derivative[1][$CellContext`cA][5], 
                Part[$CellContext`soln$, 1]]}], 
             Inset[
              Style[
              "[A]\!\(\*SubscriptBox[\('\), \(ss\)]\)", 12, Background -> 
               White], {5, 
               ReplaceAll[
               0.005 + $CellContext`eqAssD$, $CellContext`t -> 5]}], 
             Inset[
              Style[
              "[P]\!\(\*SubscriptBox[\('\), \(ns\)]\)", 12, Background -> 
               White], {7, 
               ReplaceAll[0.005 + Derivative[1][$CellContext`cP][7], 
                Part[$CellContext`soln$, 1]]}], 
             Inset[
              Style[
              "[P]\!\(\*SubscriptBox[\('\), \(ss\)]\) or \
[Q]\!\(\*SubscriptBox[\('\), \(ss\)]\)", 12, Background -> White], {40, 
               
               ReplaceAll[-0.01 + $CellContext`eqPssD$, $CellContext`t -> 
                40]}], 
             Inset[
              Style[
              "[Q]\!\(\*SubscriptBox[\('\), \(ns\)]\)", 12, Background -> 
               White], {5, 
               ReplaceAll[-0.01 + Derivative[1][$CellContext`cQ][5], 
                Part[$CellContext`soln$, 1]]}]}]; $CellContext`plot3$ = 
         Plot[{$CellContext`eqEns$, $CellContext`eqEss$, $CellContext`eqFns$, \
$CellContext`eqFss$}, {$CellContext`t, 0.02, 250}, 
           Evaluate[$CellContext`PingPongModel3$], 
           PlotStyle -> {{Thick, Pink}, {Thick, 
              Darker[Blue], Dashed}, {Thick, 
              Darker[Green]}, {Thick, Dashed, 
              Darker[Cyan]}}, Epilog -> {
             Inset[
              Style[
              "[E\!\(\*SubscriptBox[\(]\), \(ns\)]\)", 12, Background -> 
               White], {5, 
               ReplaceAll[0.05 + $CellContext`cE[5], 
                Part[$CellContext`soln$, 1]]}], 
             Inset[
              Style[
              "[E\!\(\*SubscriptBox[\(]\), \(ss\)]\)", 12, Background -> 
               White], {3, 
               ReplaceAll[-0.05 + $CellContext`eqEss$, $CellContext`t -> 3]}], 
             Inset[
              Style[
              "[F\!\(\*SubscriptBox[\(]\), \(ns\)]\)", 12, Background -> 
               White], {5, 
               ReplaceAll[-0.05 + $CellContext`cF[5], 
                Part[$CellContext`soln$, 1]]}], 
             Inset[
              Style[
              "[F\!\(\*SubscriptBox[\(]\), \(ss\)]\)", 12, Background -> 
               White], {3, 
               ReplaceAll[
               0.05 + $CellContext`eqFss$, $CellContext`t -> 3]}]}]; Pane[
          Switch[$CellContext`PingPong$$, 1, 
           Show[$CellContext`plot1$], 2, 
           Show[$CellContext`plot2$], 3, 
           Show[$CellContext`plot3$]], ImageSize -> 1.2 {480, 310}]], 
      "Specifications" :> {{{$CellContext`cAo$$, 5, 
          "[A\!\(\*SubscriptBox[\(]\), \(0\)]\),\!\(\*FormBox[RowBox[{\" \", \
RowBox[{\"mol\", \" \", \
SuperscriptBox[RowBox[{StyleBox[\"m\",FontSlant->\"Plain\"], \" \"}], \
RowBox[{\"\[Dash]\", \"3\"}]]}]}],TraditionalForm]\)"}, 0.1, 10, Appearance -> 
         "Labeled", ControlPlacement -> 
         1}, {{$CellContext`cEo$$, 1, 
          "[E\!\(\*SubscriptBox[\(]\), \(0\)]\),\!\(\*FormBox[RowBox[{\" \", \
RowBox[{\"mol\", \" \", \
SuperscriptBox[RowBox[{StyleBox[\"m\",FontSlant->\"Plain\"], \" \"}], \
RowBox[{\"\[Dash]\", \"3\"}]]}]}],TraditionalForm]\)"}, 0.1, 2, Appearance -> 
         "Labeled", ControlPlacement -> 
         2}, {{$CellContext`cFo$$, 0, 
          "[F\!\(\*SubscriptBox[\(]\), \(0\)]\),\!\(\*FormBox[RowBox[{\" \", \
RowBox[{\"mol\", \" \", \
SuperscriptBox[RowBox[{StyleBox[\"m\",FontSlant->\"Plain\"], \" \"}], \
RowBox[{\"\[Dash]\", \"3\"}]]}]}],TraditionalForm]\)"}, 0, 0, Appearance -> 
         "Labeled", ControlPlacement -> 
         3}, {{$CellContext`cPo$$, 0, 
          "[P\!\(\*SubscriptBox[\(]\), \(0\)]\),\!\(\*FormBox[RowBox[{\" \", \
RowBox[{\"mol\", \" \", \
SuperscriptBox[RowBox[{StyleBox[\"m\",FontSlant->\"Plain\"], \" \"}], \
RowBox[{\"\[Dash]\", \"3\"}]]}]}],TraditionalForm]\)"}, 0, 0, Appearance -> 
         "Labeled", ControlPlacement -> 
         4}, {{$CellContext`cQo$$, 0, 
          "[Q\!\(\*SubscriptBox[\(]\), \(0\)]\),\!\(\*FormBox[RowBox[{\" \", \
RowBox[{\"mol\", \" \", \
SuperscriptBox[RowBox[{StyleBox[\"m\",FontSlant->\"Plain\"], \" \"}], \
RowBox[{\"\[Dash]\", \"3\"}]]}]}],TraditionalForm]\)"}, 0, 0, Appearance -> 
         "Labeled", ControlPlacement -> 
         5}, {{$CellContext`cIo$$, 0, 
          "[I\!\(\*SubscriptBox[\(]\), \(0\)]\),\!\(\*FormBox[RowBox[{\" \", \
RowBox[{\"mol\", \" \", \
SuperscriptBox[RowBox[{StyleBox[\"m\",FontSlant->\"Plain\"], \" \"}], \
RowBox[{\"\[Dash]\", \"3\"}]]}]}],TraditionalForm]\)"}, 0, 0, Appearance -> 
         "Labeled", ControlPlacement -> 
         6}, {{$CellContext`ka$$, 0.005, 
          "\!\(\*SubscriptBox[StyleBox[\"k\",FontSlant->\"Italic\"], \
\"a\"]\), \
\!\(\*FormBox[RowBox[{SuperscriptBox[StyleBox[\"s\",FontSlant->\"Plain\"], \
RowBox[{\"\[Dash]\", \"1\"}]], \" \", SuperscriptBox[\"mol\", RowBox[{\"\
\[Dash]\", \"1\"}]], \" \", \
SuperscriptBox[StyleBox[\"m\",FontSlant->\"Plain\"], \
\"3\"]}],TraditionalForm]\)"}, 0.001, 0.01, Appearance -> "Labeled", 
         ControlPlacement -> 
         7}, {{$CellContext`kd$$, 0.05, 
          "\!\(\*SubscriptBox[StyleBox[\"k\",FontSlant->\"Italic\"], \
\"d\"]\), \
\!\(\*FormBox[RowBox[{SuperscriptBox[StyleBox[\"s\",FontSlant->\"Plain\"], \
RowBox[{\"\[Dash]\", \"1\"}]], \" \", SuperscriptBox[\"mol\", RowBox[{\"\
\[Dash]\", \"1\"}]], \" \", \
SuperscriptBox[StyleBox[\"m\",FontSlant->\"Plain\"], \
\"3\"]}],TraditionalForm]\)"}, 0.001, 0.1, Appearance -> "Labeled", 
         ControlPlacement -> 8}, {{$CellContext`PingPong$$, 1, "Panels"}, {
         1 -> "A", 2 -> "B", 3 -> "C"}, ControlType -> Setter, 
         ControlPlacement -> 9}, 
        Row[{
          Column[{
            Style["REACTANTS CONCENTRATIONS:", Bold], 
            Manipulate`Place[1], 
            Manipulate`Place[2], 
            Manipulate`Place[3], 
            Manipulate`Place[4], 
            Manipulate`Place[5], 
            Manipulate`Place[6]}], 
          Column[{
            Style["RATE CONSTANTS:", Bold], 
            Manipulate`Place[7], 
            Manipulate`Place[8]}], 
          Manipulate`Place[9]}]}, "Options" :> {}, "DefaultOptions" :> {}],
     ImageSizeCache->{691., {351., 357.}},
     SingleEvaluation->True],
    Deinitialization:>None,
    DynamicModuleValues:>{},
    SynchronousInitialization->True,
    UndoTrackedVariables:>{Typeset`show$$, Typeset`bookmarkMode$$},
    UnsavedVariables:>{Typeset`initDone$$},
    UntrackedVariables:>{Typeset`size$$}], "Manipulate",
   Deployed->True,
   StripOnInput->False],
  Manipulate`InterpretManipulate[1]]], "Output",
 CellChangeTimes->{
  3.8752679854345903`*^9, 3.8752680686608367`*^9, 3.8752681029509134`*^9, 
   3.875268585292946*^9, 3.8752687404061594`*^9, 3.8752687719202986`*^9, 
   3.875268809057222*^9, 3.8752689368110657`*^9, 3.8752690313313265`*^9, 
   3.8752691843852673`*^9, 3.875269225994299*^9, 3.8752693081368275`*^9, 
   3.875269386138487*^9, 3.875269422106282*^9, 3.875269483682081*^9, 
   3.875269521124774*^9, 3.875269559560853*^9, 3.8752698294164443`*^9, {
   3.8752698711211843`*^9, 3.875269900155514*^9}, 3.8752699378063965`*^9, 
   3.87527020175226*^9, 3.8752702490638227`*^9, 3.87527029867201*^9, 
   3.8752703575125647`*^9, {3.875270398723383*^9, 3.8752704192369833`*^9}, 
   3.8752705208716736`*^9, {3.8752711915528936`*^9, 3.875271216645067*^9}, 
   3.875271394519219*^9, 3.875588572418377*^9, 3.875588794620318*^9, 
   3.8755891852492075`*^9, 3.875591081478214*^9, 3.875591239504055*^9, 
   3.8755913401008577`*^9, 3.8755913775688353`*^9, 3.8755916421825953`*^9, 
   3.875767800477245*^9, 3.876564557668177*^9},
 CellLabel->"Out[6]=",ExpressionUUID->"80ec07db-bd0a-4c40-bd13-a2282e849c04"]
}, Open  ]]
}, Open  ]]
}, Open  ]]
}, Open  ]]
},
WindowSize->{834, 981},
WindowMargins->{{Automatic, 31}, {Automatic, 3}},
FrontEndVersion->"12.2 for Microsoft Windows (64-bit) (December 12, 2020)",
StyleDefinitions->"Default.nb",
ExpressionUUID->"0d11f8fc-5e4f-434a-82b5-0d0a4b09446b"
]
(* End of Notebook Content *)

(* Internal cache information *)
(*CellTagsOutline
CellTagsIndex->{}
*)
(*CellTagsIndex
CellTagsIndex->{}
*)
(*NotebookFileOutline
Notebook[{
Cell[CellGroupData[{
Cell[580, 22, 403, 8, 143, "Section",ExpressionUUID->"fcdc43a0-651d-4e85-be85-b20ade3d5410"],
Cell[CellGroupData[{
Cell[1008, 34, 38477, 547, 147, "Subsection",ExpressionUUID->"95d97992-9729-40f2-bb00-494dbb07bca4"],
Cell[CellGroupData[{
Cell[39510, 585, 1230, 20, 219, "Subsubsection",ExpressionUUID->"ff8420d5-4d48-4eff-aeb3-feed7e6e1f08"],
Cell[CellGroupData[{
Cell[40765, 609, 1793, 57, 67, "Input",ExpressionUUID->"d3847125-987d-4ae0-b46a-22b4f3b7d64c"],
Cell[42561, 668, 562, 16, 32, "Output",ExpressionUUID->"33e86af6-ad6b-4eb0-a47b-9d6266ae0357"],
Cell[43126, 686, 580, 17, 32, "Output",ExpressionUUID->"06c9d548-f62e-45dd-897c-5fc2aa471317"],
Cell[43709, 705, 580, 17, 32, "Output",ExpressionUUID->"c538a857-b5cc-4e5e-8896-f9058d265800"]
}, Open  ]],
Cell[CellGroupData[{
Cell[44326, 727, 532, 15, 28, "Input",ExpressionUUID->"d59bf8d1-34f8-4a18-bcb1-1d90c9470af5"],
Cell[44861, 744, 334, 9, 50, "Output",ExpressionUUID->"9b5106f9-fe6d-4ae3-8bf1-b606da87cb3b"]
}, Open  ]],
Cell[CellGroupData[{
Cell[45232, 758, 982, 28, 76, "Input",ExpressionUUID->"3d9954ac-c4b1-4437-b27a-bd50260bc13a"],
Cell[46217, 788, 466, 12, 49, "Output",ExpressionUUID->"fd33eafe-6471-4ede-9529-71539d10321b"]
}, Open  ]],
Cell[CellGroupData[{
Cell[46720, 805, 1095, 30, 77, "Input",ExpressionUUID->"08e092cb-fe79-4de0-b4ae-1faec59893f9"],
Cell[47818, 837, 563, 15, 55, "Output",ExpressionUUID->"c468621a-4f4c-448c-abf6-5731c0aa8248"]
}, Open  ]],
Cell[CellGroupData[{
Cell[48418, 857, 491, 14, 46, "Input",ExpressionUUID->"9f671859-dfa7-45d5-9fbc-f8692c541b68"],
Cell[48912, 873, 334, 9, 50, "Output",ExpressionUUID->"a6180a92-0a10-4ade-99ea-cd275431c67f"]
}, Open  ]],
Cell[CellGroupData[{
Cell[49283, 887, 1096, 30, 77, "Input",ExpressionUUID->"762803ec-4930-4880-801c-e92b9d351174"],
Cell[50382, 919, 562, 15, 55, "Output",ExpressionUUID->"3b525afa-92c6-47cb-9ea6-2023cd5be344"]
}, Open  ]],
Cell[CellGroupData[{
Cell[50981, 939, 55784, 1101, 2636, "Input",ExpressionUUID->"9fd071ca-48b5-4a16-a731-add715db2899"],
Cell[106768, 2042, 22533, 440, 748, "Output",ExpressionUUID->"80ec07db-bd0a-4c40-bd13-a2282e849c04"]
}, Open  ]]
}, Open  ]]
}, Open  ]]
}, Open  ]]
}
]
*)
